# Supplementary material for: A global analysis of CNVs in Chinese indigenous fine-wool sheep populations using whole-genome resequencing
Source: PubMed Central journal article supplement (PMC7825165; doi:10.1186/s12864-021-07387-7), 2021-01-23

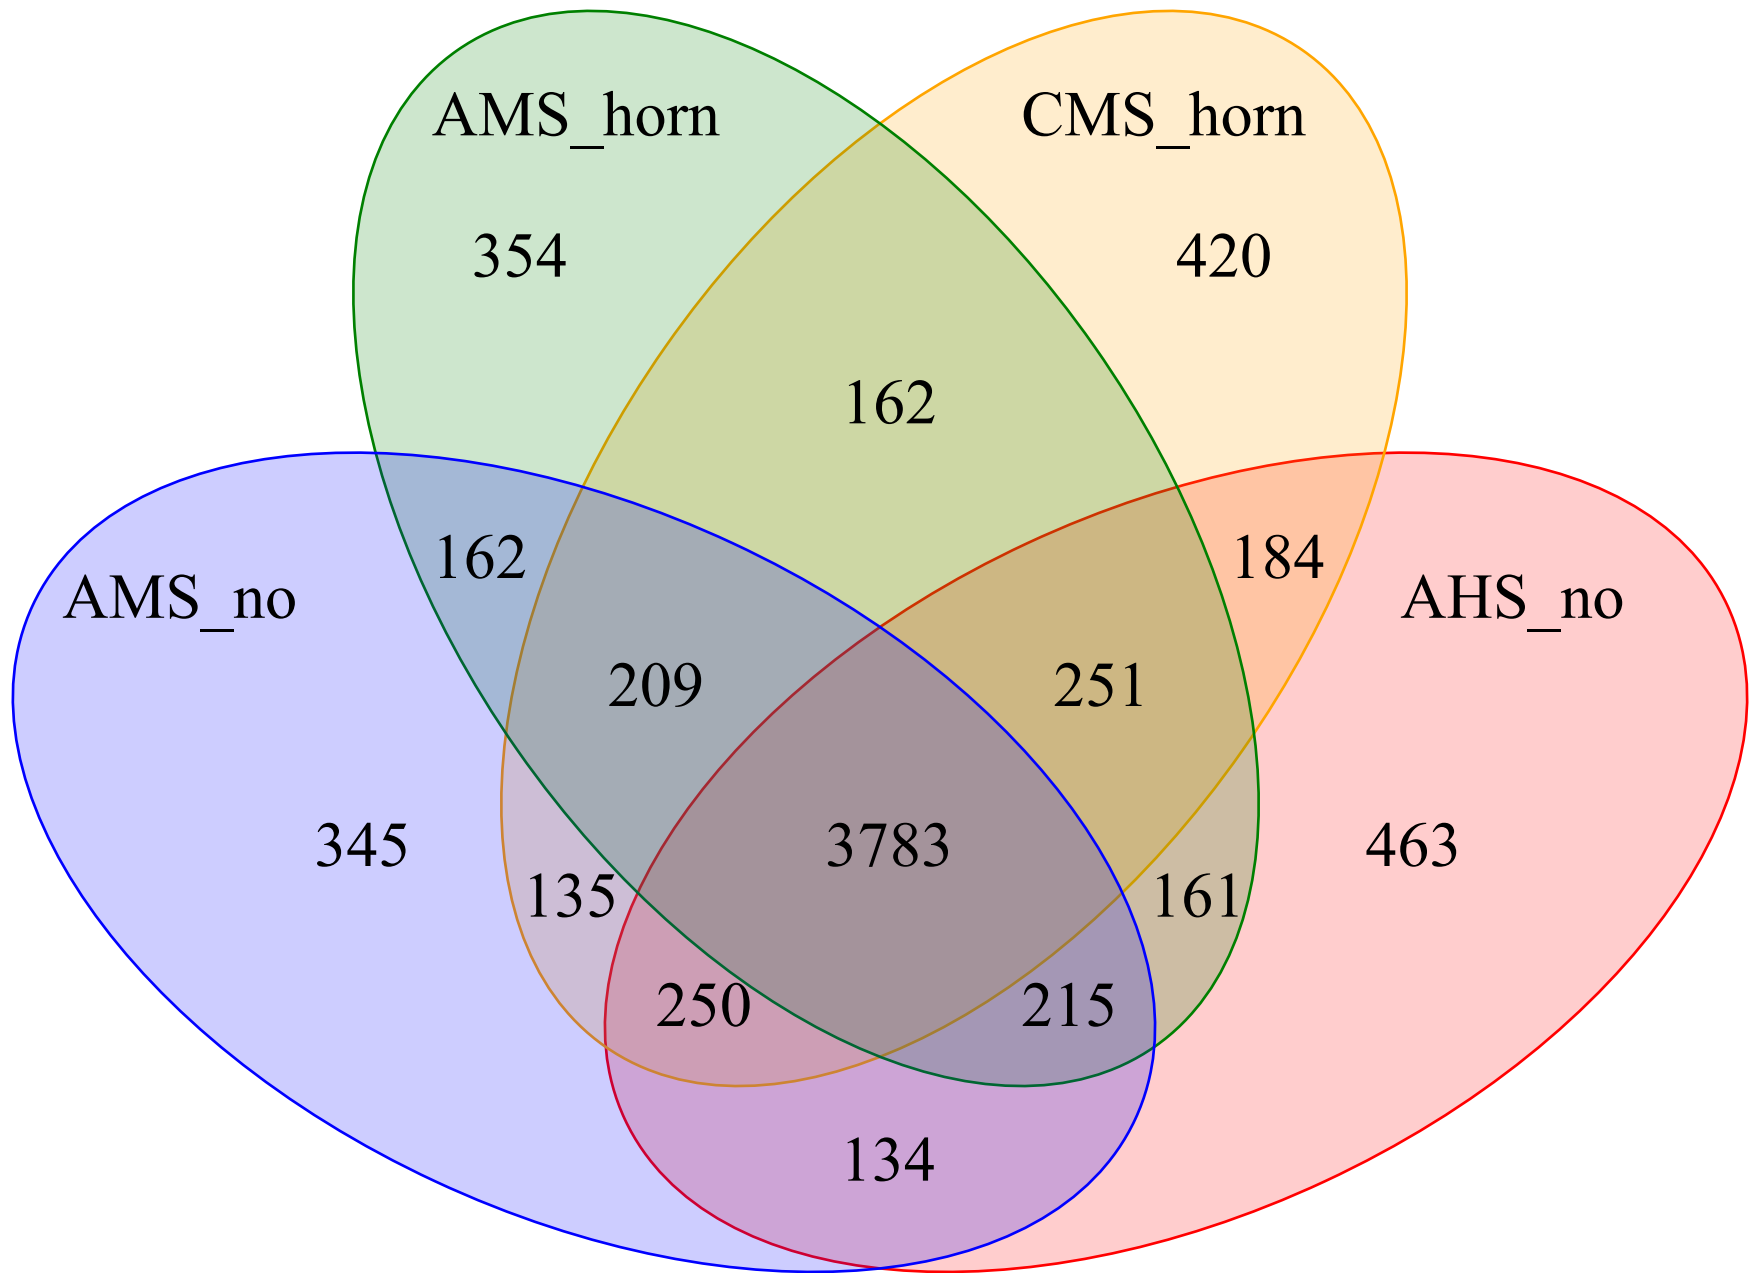

Supplement: 12864_2021_7387_MOESM5_ESM.pdf [file 12864_2021_7387_MOESM5_ESM.pdf]
