# Supplementary material for: A global analysis of CNVs in Chinese indigenous fine-wool sheep populations using whole-genome resequencing
Source: BMC Genomics. 2021 Jan 23;22:78. doi: 10.1186/s12864-021-07387-7 (PMC7825165; doi:10.1186/s12864-021-07387-7)
Supplement: Supplementary file 1 — Additional file 1: Table S1. Number of reads and bases in quality control. [file 12864_2021_7387_MOESM1_ESM.xlsx]

## Sheet: Table S1
Table S1. Number of reads and bases in quality control.
Breed	Sample	Sex	Raw reads	Raw bases	Clean reads	Clean bases	GC content (%)	Q20 (%)	Q30 (%)
Alpine Merino Sheep (AMS_no)	M373708	male	607121712	91068256800	606566962	90985044300	43.9	95.84	90.46
	M373649	male	775770374	116365556100	774862152	116229322800	43.89	95.82	90.37
	M345057	male	675427884	101314182600	674927382	101239107300	43.88	95.62	89.96
	M373690	male	658820154	98823023100	658171020	98725653000	44.14	96	90.69
	K428506	male	686355340	102953301000	685746548	102861982200	44.2	95.87	90.47
	K428518	male	663352166	99502824900	662750896	99412634400	43.81	95.77	90.35
	M373984	male	838704692	125805703800	837732432	125659864800	44.06	96.06	90.81
	M380230	male	771870174	115780526100	770970492	115645573800	44.07	94.36	87.97
Alpine Merino Sheep (AMS_horn)	K428271	male	763219468	114482920200	762246004	114336900600	43.92	96.14	91
	M373815	male	758461768	113769265200	757403146	113610471900	43.77	95.78	90.25
	M349671	male	699185414	104877812100	698690946	104803641900	44.72	96.89	92.76
	M373370	male	617195712	92579356800	616130488	92419573200	44.02	95.85	90.52
	M373788	male	690901846	103635276900	690053316	103507997400	43.95	96.15	90.99
	M373821	male	634264708	95139706200	633348992	95002348800	43.94	95.83	90.4
	K428330	male	721449572	108217435800	720374416	108056162400	43.95	95.96	90.64
	M373238	male	621026802	93154020300	620508218	93076232700	43.84	96.24	91.25
Chinese Merino Sheep (CMS_horn)	M345182	male	683012322	102451848300	682250702	102337605300	44.06	96.17	91.15
	M373950	male	703047208	105457081200	702137878	105320681700	44	95.69	90.34
	M373981	male	848821424	127323213600	847659464	127148919600	43.62	95.76	90.25
	K428302	male	793531078	119029661700	792443044	118866456600	44.44	96.66	91.94
	K428406	male	779198000	116879700000	778400434	116760065100	43.84	95.85	90.57
	M373382	male	681378042	102206706300	680344318	102051647700	44.03	95.81	90.4
	M345197	male	673903100	101085465000	673207920	100981188000	44.48	95.84	89.96
	K428334	male	640598216	96089732400	639841688	95976253200	43.95	96.19	91.22
Aohan Finewool Sheep (AHS_no)	M355686	male	657432518	98614877700	656913296	98536994400	43.96	95.91	90.55
	K422852	male	705057556	105758633400	704303786	105645567900	43.99	96.12	91.02
	K427086	male	647833736	97175060400	646648568	96997285200	44	96.16	91.1
	M374531	male	809137598	121370639700	808335772	121250365800	43.91	95.59	90.02
	K429524	male	792304310	118845646500	791287020	118693053000	44.11	95.88	90.49
	K420535	male	814559012	122183851800	812809982	121921497300	44.23	96.04	90.91
	K421177	male	635026292	95253943800	634249890	95137483500	43.88	94.62	87.64
	M374639	male	793447114	119017067100	792705652	118905847800	44.08	95.99	90.63
