# Supplementary material for: A global analysis of CNVs in Chinese indigenous fine-wool sheep populations using whole-genome resequencing
Source: BMC Genomics. 2021 Jan 23;22:78. doi: 10.1186/s12864-021-07387-7 (PMC7825165; doi:10.1186/s12864-021-07387-7)
Supplement: Supplementary file 8 — Additional file 8: Table S6. Functional enrichment of KEGG analysis of CNVR-harbored genes. [file 12864_2021_7387_MOESM8_ESM.xlsx]

## Sheet: Table S6
Table S6. Functional enrichment of KEGG analysis of CNVR-harbored genes
Group	ID	Description	Input number	Background number	pValue	Corrected pValue
AMS_no, AMS_horn, CMS_horn and AHS_no shared CNVRs	oas04630	Jak-STAT signaling pathway	22	167	0.000736	0.17664
	oas04970	Salivary secretion	13	90	0.00421843	0.358463
	oas04070	Phosphatidylinositol signaling system	12	80	0.00448079	0.358463
	oas04530	Tight junction	16	135	0.00901738	0.472485
	oas04724	Glutamatergic synapse	14	113	0.0100852	0.472485
	oas04730	Long-term depression	9	59	0.0118121	0.472485
	oas05162	Measles	15	136	0.0193023	0.572203
	oas04622	RIG-I-like receptor signaling pathway	10	76	0.0193929	0.572203
	oas00140	Steroid hormone biosynthesis	9	66	0.0214576	0.572203
	oas04723	Retrograde endocannabinoid signaling	12	104	0.0257839	0.603474
	oas04015	Rap1 signaling pathway	20	212	0.0314358	0.603474
	oas04020	Calcium signaling pathway	18	186	0.0326489	0.603474
	oas05212	Pancreatic cancer	8	64	0.0434376	0.603474
	oas04390	Hippo signaling pathway	15	153	0.0440451	0.603474
	oas04725	Cholinergic synapse	12	114	0.0446507	0.603474
	oas04915	Estrogen signaling pathway	11	102	0.0465032	0.603474
	oas04510	Focal adhesion	19	210	0.0487674	0.603474
	oas05223	Non-small cell lung cancer	7	54	0.0491292	0.603474
AMS_no group-specific CNVRs	oas02010	ABC transporters	3	55	0.00240629	0.178065
	oas00760	Nicotinate and nicotinamide metabolism	2	25	0.00677758	0.250771
	oas05203	Viral carcinogenesis	4	220	0.0197831	0.323069
	oas00500	Starch and sucrose metabolism	2	49	0.0229272	0.323069
	oas05332	Graft-versus-host disease	2	49	0.0229272	0.323069
	oas05330	Allograft rejection	2	54	0.0272868	0.323069
	oas04940	Type I diabetes mellitus	2	59	0.0319511	0.323069
	oas05320	Autoimmune thyroid disease	2	63	0.0358913	0.323069
	oas00750	Vitamin B6 metabolism	1	8	0.040495	0.323069
	oas05202	Transcriptional misregulation in cancer	3	168	0.044098	0.323069
	oas05416	Viral myocarditis	2	75	0.0487436	0.323069
AMS_horn group-specific CNVRs	oas02010	ABC transporters	5	55	1.61718e-05	0.00118054
	oas04976	Bile secretion	4	83	0.00116254	0.0283068
	oas04024	cAMP signaling pathway	6	216	0.00116329	0.0283068
	oas05031	Amphetamine addiction	3	67	0.00602706	0.105959
	oas00534	Glycosaminoglycan biosynthesis - heparan sulfate / heparin	2	24	0.0082203	0.105959
	oas00590	Arachidonic acid metabolism	3	77	0.00870892	0.105959
	oas04713	Circadian entrainment	3	96	0.0154723	0.161354
	oas05033	Nicotine addiction	2	42	0.0225012	0.205323
	oas04728	Dopaminergic synapse	3	131	0.0339099	0.264975
	oas04913	Ovarian steroidogenesis	2	56	0.0374946	0.264975
	oas04730	Long-term depression	2	59	0.0410908	0.264975
	oas00830	Retinol metabolism	2	61	0.0435576	0.264975
	oas00140	Steroid hormone biosynthesis	2	66	0.0499572	0.280529
CMS_horn group-specific CNVRs	oas02010	ABC transporters	6	55	2.38386e-07	1.81173e-05
	oas04976	Bile secretion	5	83	3.78124e-05	0.00143687
	oas04742	Taste transduction	2	36	0.0114449	0.289938
	oas00600	Sphingolipid metabolism	2	47	0.018574	0.352906
	oas05150	Staphylococcus aureus infection	2	65	0.0332399	0.427311
	oas05210	Colorectal cancer	2	70	0.0379055	0.427311
AHS_no group-specific CNVRs	oas04977	Vitamin digestion and absorption	2	22	0.0111726	0.70435
	oas04146	Peroxisome	3	84	0.0207572	0.70435
