# Supplementary material for: A global analysis of CNVs in Chinese indigenous fine-wool sheep populations using whole-genome resequencing
Source: BMC Genomics. 2021 Jan 23;22:78. doi: 10.1186/s12864-021-07387-7 (PMC7825165; doi:10.1186/s12864-021-07387-7)
Supplement: Supplementary file 9 — Additional file 9: Table S7. Information about QTLs overlapping with identified CNVRs. [file 12864_2021_7387_MOESM9_ESM.xlsx]

## Sheet: Table S7
Table S7.Information about QTLs overlapping with identified CNVRs.
Chr	CNVR_start	CNVR_end	QTL_start	QTL_end	QTL	Gene
1	14907201	14910400	14679846	14926261	Tail fat deposition QTL (126993)	COL9A2,LOC105605297,ZFP69B,RIMS3,LOC101122989,ZNF684,LOC101102188,EXO5,SMAP2,ZFP69
1	43671501	43672500	43364423	43824859	Hematocrit QTL (126070)	WLS,RPE65,DEPDC1
1	43673101	43675300	43364423	43824859	Hematocrit QTL (126070)	WLS,RPE65,DEPDC1
1	51213401	51217100	51044700	51363058	Milk protein percentage QTL (57735)	LOC105611835,MSH4,RABGGTB,SLC44A5
1	51217101	51218200	51044700	51363058	Milk protein percentage QTL (57735)	LOC105611835,MSH4,RABGGTB,SLC44A5
1	51218201	51223300	51044700	51363058	Milk protein percentage QTL (57735)	LOC105611835,MSH4,RABGGTB,SLC44A5
1	51227201	51228600	51044700	51363058	Milk protein percentage QTL (57735)	LOC105611835,MSH4,RABGGTB,SLC44A5
1	51291301	51296300	51044700	51363058	Milk protein percentage QTL (57735)	LOC105611835,MSH4,RABGGTB,SLC44A5
1	87310801	87311900	87265003	88007267	Fecal egg count QTL (125775)	LOC101106738,LOC101113807,LRIF1,LOC101114067,CHIA,LOC101106229,WDR77,LOC105615255,C1H1orf162,TMIGD3,LOC105609260,PIFO,CD53,LOC101106487,OVGP1,LOC106990799,DRAM2,ADORA3,ATP5F1,CEPT1,DENND2D,LOC105609261,LOC105609259
1	87360701	87362700	87265003	88007267	Fecal egg count QTL (125775)	LOC101106738,LOC101113807,LRIF1,LOC101114067,CHIA,LOC101106229,WDR77,LOC105615255,C1H1orf162,TMIGD3,LOC105609260,PIFO,CD53,LOC101106487,OVGP1,LOC106990799,DRAM2,ADORA3,ATP5F1,CEPT1,DENND2D,LOC105609261,LOC105609259
1	87411401	87412800	87265003	88007267	Fecal egg count QTL (125775)	LOC101106738,LOC101113807,LRIF1,LOC101114067,CHIA,LOC101106229,WDR77,LOC105615255,C1H1orf162,TMIGD3,LOC105609260,PIFO,CD53,LOC101106487,OVGP1,LOC106990799,DRAM2,ADORA3,ATP5F1,CEPT1,DENND2D,LOC105609261,LOC105609259
1	87454901	87457300	87265003	88007267	Fecal egg count QTL (125775)	LOC101106738,LOC101113807,LRIF1,LOC101114067,CHIA,LOC101106229,WDR77,LOC105615255,C1H1orf162,TMIGD3,LOC105609260,PIFO,CD53,LOC101106487,OVGP1,LOC106990799,DRAM2,ADORA3,ATP5F1,CEPT1,DENND2D,LOC105609261,LOC105609259
1	87663601	87664700	87265003	88007267	Fecal egg count QTL (125775)	LOC101106738,LOC101113807,LRIF1,LOC101114067,CHIA,LOC101106229,WDR77,LOC105615255,C1H1orf162,TMIGD3,LOC105609260,PIFO,CD53,LOC101106487,OVGP1,LOC106990799,DRAM2,ADORA3,ATP5F1,CEPT1,DENND2D,LOC105609261,LOC105609259
1	87760701	87761800	87265003	88007267	Fecal egg count QTL (125775)	LOC101106738,LOC101113807,LRIF1,LOC101114067,CHIA,LOC101106229,WDR77,LOC105615255,C1H1orf162,TMIGD3,LOC105609260,PIFO,CD53,LOC101106487,OVGP1,LOC106990799,DRAM2,ADORA3,ATP5F1,CEPT1,DENND2D,LOC105609261,LOC105609259
1	87985701	87987100	87265003	88007267	Fecal egg count QTL (125775)	LOC101106738,LOC101113807,LRIF1,LOC101114067,CHIA,LOC101106229,WDR77,LOC105615255,C1H1orf162,TMIGD3,LOC105609260,PIFO,CD53,LOC101106487,OVGP1,LOC106990799,DRAM2,ADORA3,ATP5F1,CEPT1,DENND2D,LOC105609261,LOC105609259
1	94975101	94976100	94703660	95129986	Tail fat deposition QTL (126994)	LOC105610669
1	95038701	95040200	94703660	95129986	Tail fat deposition QTL (126994)	LOC105610669
1	125264901	125266300	123828343	128567314	muscle weight in carcass QTL (95851)	LTN1,ADAMTS5,USP16,GRIK1,TRNAS-GGA,LOC105613472,APP,BACH1,MAP3K7CL,LOC105610400,LOC105611820,LOC101117388,CCT8,N6AMT1,LOC105610396,CYYR1,RWDD2B,TRNAR-CCU,ADAMTS1
1	125300801	125302000	123828343	128567314	muscle weight in carcass QTL (95851)	LTN1,ADAMTS5,USP16,GRIK1,TRNAS-GGA,LOC105613472,APP,BACH1,MAP3K7CL,LOC105610400,LOC105611820,LOC101117388,CCT8,N6AMT1,LOC105610396,CYYR1,RWDD2B,TRNAR-CCU,ADAMTS1
1	125468301	125491100	123828343	128567314	muscle weight in carcass QTL (95851)	LTN1,ADAMTS5,USP16,GRIK1,TRNAS-GGA,LOC105613472,APP,BACH1,MAP3K7CL,LOC105610400,LOC105611820,LOC101117388,CCT8,N6AMT1,LOC105610396,CYYR1,RWDD2B,TRNAR-CCU,ADAMTS1
1	125501101	125502300	123828343	128567314	muscle weight in carcass QTL (95851)	LTN1,ADAMTS5,USP16,GRIK1,TRNAS-GGA,LOC105613472,APP,BACH1,MAP3K7CL,LOC105610400,LOC105611820,LOC101117388,CCT8,N6AMT1,LOC105610396,CYYR1,RWDD2B,TRNAR-CCU,ADAMTS1
1	125908801	125910200	123828343	128567314	muscle weight in carcass QTL (95851)	LTN1,ADAMTS5,USP16,GRIK1,TRNAS-GGA,LOC105613472,APP,BACH1,MAP3K7CL,LOC105610400,LOC105611820,LOC101117388,CCT8,N6AMT1,LOC105610396,CYYR1,RWDD2B,TRNAR-CCU,ADAMTS1
1	125914601	125919300	123828343	128567314	muscle weight in carcass QTL (95851)	LTN1,ADAMTS5,USP16,GRIK1,TRNAS-GGA,LOC105613472,APP,BACH1,MAP3K7CL,LOC105610400,LOC105611820,LOC101117388,CCT8,N6AMT1,LOC105610396,CYYR1,RWDD2B,TRNAR-CCU,ADAMTS1
1	126157301	126158700	123828343	128567314	muscle weight in carcass QTL (95851)	LTN1,ADAMTS5,USP16,GRIK1,TRNAS-GGA,LOC105613472,APP,BACH1,MAP3K7CL,LOC105610400,LOC105611820,LOC101117388,CCT8,N6AMT1,LOC105610396,CYYR1,RWDD2B,TRNAR-CCU,ADAMTS1
1	126663701	126665500	123828343	128567314	muscle weight in carcass QTL (95851)	LTN1,ADAMTS5,USP16,GRIK1,TRNAS-GGA,LOC105613472,APP,BACH1,MAP3K7CL,LOC105610400,LOC105611820,LOC101117388,CCT8,N6AMT1,LOC105610396,CYYR1,RWDD2B,TRNAR-CCU,ADAMTS1
1	126702101	126703100	123828343	128567314	muscle weight in carcass QTL (95851)	LTN1,ADAMTS5,USP16,GRIK1,TRNAS-GGA,LOC105613472,APP,BACH1,MAP3K7CL,LOC105610400,LOC105611820,LOC101117388,CCT8,N6AMT1,LOC105610396,CYYR1,RWDD2B,TRNAR-CCU,ADAMTS1
1	126977401	126978600	123828343	128567314	muscle weight in carcass QTL (95851)	LTN1,ADAMTS5,USP16,GRIK1,TRNAS-GGA,LOC105613472,APP,BACH1,MAP3K7CL,LOC105610400,LOC105611820,LOC101117388,CCT8,N6AMT1,LOC105610396,CYYR1,RWDD2B,TRNAR-CCU,ADAMTS1
1	127004701	127005900	123828343	128567314	muscle weight in carcass QTL (95851)	LTN1,ADAMTS5,USP16,GRIK1,TRNAS-GGA,LOC105613472,APP,BACH1,MAP3K7CL,LOC105610400,LOC105611820,LOC101117388,CCT8,N6AMT1,LOC105610396,CYYR1,RWDD2B,TRNAR-CCU,ADAMTS1
1	127100001	127104700	123828343	128567314	muscle weight in carcass QTL (95851)	LTN1,ADAMTS5,USP16,GRIK1,TRNAS-GGA,LOC105613472,APP,BACH1,MAP3K7CL,LOC105610400,LOC105611820,LOC101117388,CCT8,N6AMT1,LOC105610396,CYYR1,RWDD2B,TRNAR-CCU,ADAMTS1
1	127239901	127242600	123828343	128567314	muscle weight in carcass QTL (95851)	LTN1,ADAMTS5,USP16,GRIK1,TRNAS-GGA,LOC105613472,APP,BACH1,MAP3K7CL,LOC105610400,LOC105611820,LOC101117388,CCT8,N6AMT1,LOC105610396,CYYR1,RWDD2B,TRNAR-CCU,ADAMTS1
1	127551401	127557100	123828343	128567314	muscle weight in carcass QTL (95851)	LTN1,ADAMTS5,USP16,GRIK1,TRNAS-GGA,LOC105613472,APP,BACH1,MAP3K7CL,LOC105610400,LOC105611820,LOC101117388,CCT8,N6AMT1,LOC105610396,CYYR1,RWDD2B,TRNAR-CCU,ADAMTS1
1	127760401	127761400	123828343	128567314	muscle weight in carcass QTL (95851)	LTN1,ADAMTS5,USP16,GRIK1,TRNAS-GGA,LOC105613472,APP,BACH1,MAP3K7CL,LOC105610400,LOC105611820,LOC101117388,CCT8,N6AMT1,LOC105610396,CYYR1,RWDD2B,TRNAR-CCU,ADAMTS1
1	128080001	128081000	123828343	128567314	muscle weight in carcass QTL (95851)	LTN1,ADAMTS5,USP16,GRIK1,TRNAS-GGA,LOC105613472,APP,BACH1,MAP3K7CL,LOC105610400,LOC105611820,LOC101117388,CCT8,N6AMT1,LOC105610396,CYYR1,RWDD2B,TRNAR-CCU,ADAMTS1
1	136822901	136838200	136699389	142804495	Fecal egg count QTL (95610)	RBM11,LOC101123264,TRNAS-GGA,LOC105616569,LOC101121485,LOC101123009,C1H21orf91,LOC105607356,ROBO2,TMPRSS15,NRIP1,LOC105607350,LOC105607351,MIRLET7C,CHODL,LOC106990867,USP25,LOC105616525,LOC105605735,LOC106990868,HSPA13,LOC106990870,MIR99A,LOC106990869,LOC106990866,BTG3,LOC101121232,SAMSN1,LIPI,LOC101122496,CXADR,LOC105607346
1	136838301	136843600	136699389	142804495	Fecal egg count QTL (95610)	RBM11,LOC101123264,TRNAS-GGA,LOC105616569,LOC101121485,LOC101123009,C1H21orf91,LOC105607356,ROBO2,TMPRSS15,NRIP1,LOC105607350,LOC105607351,MIRLET7C,CHODL,LOC106990867,USP25,LOC105616525,LOC105605735,LOC106990868,HSPA13,LOC106990870,MIR99A,LOC106990869,LOC106990866,BTG3,LOC101121232,SAMSN1,LIPI,LOC101122496,CXADR,LOC105607346
1	136913701	136915000	136699389	142804495	Fecal egg count QTL (95610)	RBM11,LOC101123264,TRNAS-GGA,LOC105616569,LOC101121485,LOC101123009,C1H21orf91,LOC105607356,ROBO2,TMPRSS15,NRIP1,LOC105607350,LOC105607351,MIRLET7C,CHODL,LOC106990867,USP25,LOC105616525,LOC105605735,LOC106990868,HSPA13,LOC106990870,MIR99A,LOC106990869,LOC106990866,BTG3,LOC101121232,SAMSN1,LIPI,LOC101122496,CXADR,LOC105607346
1	137576901	137578000	136699389	142804495	Fecal egg count QTL (95610)	RBM11,LOC101123264,TRNAS-GGA,LOC105616569,LOC101121485,LOC101123009,C1H21orf91,LOC105607356,ROBO2,TMPRSS15,NRIP1,LOC105607350,LOC105607351,MIRLET7C,CHODL,LOC106990867,USP25,LOC105616525,LOC105605735,LOC106990868,HSPA13,LOC106990870,MIR99A,LOC106990869,LOC106990866,BTG3,LOC101121232,SAMSN1,LIPI,LOC101122496,CXADR,LOC105607346
1	138146401	138148200	136699389	142804495	Fecal egg count QTL (95610)	RBM11,LOC101123264,TRNAS-GGA,LOC105616569,LOC101121485,LOC101123009,C1H21orf91,LOC105607356,ROBO2,TMPRSS15,NRIP1,LOC105607350,LOC105607351,MIRLET7C,CHODL,LOC106990867,USP25,LOC105616525,LOC105605735,LOC106990868,HSPA13,LOC106990870,MIR99A,LOC106990869,LOC106990866,BTG3,LOC101121232,SAMSN1,LIPI,LOC101122496,CXADR,LOC105607346
1	138178401	138180600	136699389	142804495	Fecal egg count QTL (95610)	RBM11,LOC101123264,TRNAS-GGA,LOC105616569,LOC101121485,LOC101123009,C1H21orf91,LOC105607356,ROBO2,TMPRSS15,NRIP1,LOC105607350,LOC105607351,MIRLET7C,CHODL,LOC106990867,USP25,LOC105616525,LOC105605735,LOC106990868,HSPA13,LOC106990870,MIR99A,LOC106990869,LOC106990866,BTG3,LOC101121232,SAMSN1,LIPI,LOC101122496,CXADR,LOC105607346
1	138819101	138820700	136699389	142804495	Fecal egg count QTL (95610)	RBM11,LOC101123264,TRNAS-GGA,LOC105616569,LOC101121485,LOC101123009,C1H21orf91,LOC105607356,ROBO2,TMPRSS15,NRIP1,LOC105607350,LOC105607351,MIRLET7C,CHODL,LOC106990867,USP25,LOC105616525,LOC105605735,LOC106990868,HSPA13,LOC106990870,MIR99A,LOC106990869,LOC106990866,BTG3,LOC101121232,SAMSN1,LIPI,LOC101122496,CXADR,LOC105607346
1	138893101	138894200	136699389	142804495	Fecal egg count QTL (95610)	RBM11,LOC101123264,TRNAS-GGA,LOC105616569,LOC101121485,LOC101123009,C1H21orf91,LOC105607356,ROBO2,TMPRSS15,NRIP1,LOC105607350,LOC105607351,MIRLET7C,CHODL,LOC106990867,USP25,LOC105616525,LOC105605735,LOC106990868,HSPA13,LOC106990870,MIR99A,LOC106990869,LOC106990866,BTG3,LOC101121232,SAMSN1,LIPI,LOC101122496,CXADR,LOC105607346
1	139587901	139591700	136699389	142804495	Fecal egg count QTL (95610)	RBM11,LOC101123264,TRNAS-GGA,LOC105616569,LOC101121485,LOC101123009,C1H21orf91,LOC105607356,ROBO2,TMPRSS15,NRIP1,LOC105607350,LOC105607351,MIRLET7C,CHODL,LOC106990867,USP25,LOC105616525,LOC105605735,LOC106990868,HSPA13,LOC106990870,MIR99A,LOC106990869,LOC106990866,BTG3,LOC101121232,SAMSN1,LIPI,LOC101122496,CXADR,LOC105607346
1	139635601	139637100	136699389	142804495	Fecal egg count QTL (95610)	RBM11,LOC101123264,TRNAS-GGA,LOC105616569,LOC101121485,LOC101123009,C1H21orf91,LOC105607356,ROBO2,TMPRSS15,NRIP1,LOC105607350,LOC105607351,MIRLET7C,CHODL,LOC106990867,USP25,LOC105616525,LOC105605735,LOC106990868,HSPA13,LOC106990870,MIR99A,LOC106990869,LOC106990866,BTG3,LOC101121232,SAMSN1,LIPI,LOC101122496,CXADR,LOC105607346
1	139769101	139770400	136699389	142804495	Fecal egg count QTL (95610)	RBM11,LOC101123264,TRNAS-GGA,LOC105616569,LOC101121485,LOC101123009,C1H21orf91,LOC105607356,ROBO2,TMPRSS15,NRIP1,LOC105607350,LOC105607351,MIRLET7C,CHODL,LOC106990867,USP25,LOC105616525,LOC105605735,LOC106990868,HSPA13,LOC106990870,MIR99A,LOC106990869,LOC106990866,BTG3,LOC101121232,SAMSN1,LIPI,LOC101122496,CXADR,LOC105607346
1	139830801	139833400	136699389	142804495	Fecal egg count QTL (95610)	RBM11,LOC101123264,TRNAS-GGA,LOC105616569,LOC101121485,LOC101123009,C1H21orf91,LOC105607356,ROBO2,TMPRSS15,NRIP1,LOC105607350,LOC105607351,MIRLET7C,CHODL,LOC106990867,USP25,LOC105616525,LOC105605735,LOC106990868,HSPA13,LOC106990870,MIR99A,LOC106990869,LOC106990866,BTG3,LOC101121232,SAMSN1,LIPI,LOC101122496,CXADR,LOC105607346
1	140591401	140596900	136699389	142804495	Fecal egg count QTL (95610)	RBM11,LOC101123264,TRNAS-GGA,LOC105616569,LOC101121485,LOC101123009,C1H21orf91,LOC105607356,ROBO2,TMPRSS15,NRIP1,LOC105607350,LOC105607351,MIRLET7C,CHODL,LOC106990867,USP25,LOC105616525,LOC105605735,LOC106990868,HSPA13,LOC106990870,MIR99A,LOC106990869,LOC106990866,BTG3,LOC101121232,SAMSN1,LIPI,LOC101122496,CXADR,LOC105607346
1	141091701	141093200	136699389	142804495	Fecal egg count QTL (95610)	RBM11,LOC101123264,TRNAS-GGA,LOC105616569,LOC101121485,LOC101123009,C1H21orf91,LOC105607356,ROBO2,TMPRSS15,NRIP1,LOC105607350,LOC105607351,MIRLET7C,CHODL,LOC106990867,USP25,LOC105616525,LOC105605735,LOC106990868,HSPA13,LOC106990870,MIR99A,LOC106990869,LOC106990866,BTG3,LOC101121232,SAMSN1,LIPI,LOC101122496,CXADR,LOC105607346
1	141648401	141650100	136699389	142804495	Fecal egg count QTL (95610)	RBM11,LOC101123264,TRNAS-GGA,LOC105616569,LOC101121485,LOC101123009,C1H21orf91,LOC105607356,ROBO2,TMPRSS15,NRIP1,LOC105607350,LOC105607351,MIRLET7C,CHODL,LOC106990867,USP25,LOC105616525,LOC105605735,LOC106990868,HSPA13,LOC106990870,MIR99A,LOC106990869,LOC106990866,BTG3,LOC101121232,SAMSN1,LIPI,LOC101122496,CXADR,LOC105607346
1	142266301	142267400	136699389	142804495	Fecal egg count QTL (95610)	RBM11,LOC101123264,TRNAS-GGA,LOC105616569,LOC101121485,LOC101123009,C1H21orf91,LOC105607356,ROBO2,TMPRSS15,NRIP1,LOC105607350,LOC105607351,MIRLET7C,CHODL,LOC106990867,USP25,LOC105616525,LOC105605735,LOC106990868,HSPA13,LOC106990870,MIR99A,LOC106990869,LOC106990866,BTG3,LOC101121232,SAMSN1,LIPI,LOC101122496,CXADR,LOC105607346
1	215069301	215072500	214896980	215193460	Tail fat deposition QTL (126995)	PHC3,TRNAG-CCC,PRKCI,SKIL,LOC105603381,LOC106990881,GPR160,CLDN11
1	215074501	215075600	214896980	215193460	Tail fat deposition QTL (126995)	PHC3,TRNAG-CCC,PRKCI,SKIL,LOC105603381,LOC106990881,GPR160,CLDN11
2	32153701	32154700	32052994	207432142	Milk protein percentage QTL (57738)	GORASP2,RASEF,LOC106990930,WDR33,NPM2,XPO7,PIP5K1B,LOC101112634,NMRK1,RAB3GAP1,CCAR2,LOC106990932,KIAA2012,LOC105611679,RHOBTB2,LOC101121497,CEP44,LOC105609145,LOC106990539,LOC105609818,LOC101109865,POLR2D,LOC101102375,LOC101111773,LOC105611746,CWC22,GNRH1,HNRNPK,LOC101123012,MSTN,LOC101115858,LOC101106395,LOC105607885,RIC1,PEBP4,HOXD1,POLR1E,CASP8,CCDC25,GLRA3,DLX2,RIF1,BAG1,LOC101114849,HR,LOC1…
2	33006101	33008500	32052994	207432142	Milk protein percentage QTL (57738)	GORASP2,RASEF,LOC106990930,WDR33,NPM2,XPO7,PIP5K1B,LOC101112634,NMRK1,RAB3GAP1,CCAR2,LOC106990932,KIAA2012,LOC105611679,RHOBTB2,LOC101121497,CEP44,LOC105609145,LOC106990539,LOC105609818,LOC101109865,POLR2D,LOC101102375,LOC101111773,LOC105611746,CWC22,GNRH1,HNRNPK,LOC101123012,MSTN,LOC101115858,LOC101106395,LOC105607885,RIC1,PEBP4,HOXD1,POLR1E,CASP8,CCDC25,GLRA3,DLX2,RIF1,BAG1,LOC101114849,HR,LOC1…
2	33909401	33914700	32052994	207432142	Milk protein percentage QTL (57738)	GORASP2,RASEF,LOC106990930,WDR33,NPM2,XPO7,PIP5K1B,LOC101112634,NMRK1,RAB3GAP1,CCAR2,LOC106990932,KIAA2012,LOC105611679,RHOBTB2,LOC101121497,CEP44,LOC105609145,LOC106990539,LOC105609818,LOC101109865,POLR2D,LOC101102375,LOC101111773,LOC105611746,CWC22,GNRH1,HNRNPK,LOC101123012,MSTN,LOC101115858,LOC101106395,LOC105607885,RIC1,PEBP4,HOXD1,POLR1E,CASP8,CCDC25,GLRA3,DLX2,RIF1,BAG1,LOC101114849,HR,LOC1…
2	34343001	34344300	32052994	207432142	Milk protein percentage QTL (57738)	GORASP2,RASEF,LOC106990930,WDR33,NPM2,XPO7,PIP5K1B,LOC101112634,NMRK1,RAB3GAP1,CCAR2,LOC106990932,KIAA2012,LOC105611679,RHOBTB2,LOC101121497,CEP44,LOC105609145,LOC106990539,LOC105609818,LOC101109865,POLR2D,LOC101102375,LOC101111773,LOC105611746,CWC22,GNRH1,HNRNPK,LOC101123012,MSTN,LOC101115858,LOC101106395,LOC105607885,RIC1,PEBP4,HOXD1,POLR1E,CASP8,CCDC25,GLRA3,DLX2,RIF1,BAG1,LOC101114849,HR,LOC1…
2	35369801	35382000	32052994	207432142	Milk protein percentage QTL (57738)	GORASP2,RASEF,LOC106990930,WDR33,NPM2,XPO7,PIP5K1B,LOC101112634,NMRK1,RAB3GAP1,CCAR2,LOC106990932,KIAA2012,LOC105611679,RHOBTB2,LOC101121497,CEP44,LOC105609145,LOC106990539,LOC105609818,LOC101109865,POLR2D,LOC101102375,LOC101111773,LOC105611746,CWC22,GNRH1,HNRNPK,LOC101123012,MSTN,LOC101115858,LOC101106395,LOC105607885,RIC1,PEBP4,HOXD1,POLR1E,CASP8,CCDC25,GLRA3,DLX2,RIF1,BAG1,LOC101114849,HR,LOC1…
2	35840801	35841800	32052994	207432142	Milk protein percentage QTL (57738)	GORASP2,RASEF,LOC106990930,WDR33,NPM2,XPO7,PIP5K1B,LOC101112634,NMRK1,RAB3GAP1,CCAR2,LOC106990932,KIAA2012,LOC105611679,RHOBTB2,LOC101121497,CEP44,LOC105609145,LOC106990539,LOC105609818,LOC101109865,POLR2D,LOC101102375,LOC101111773,LOC105611746,CWC22,GNRH1,HNRNPK,LOC101123012,MSTN,LOC101115858,LOC101106395,LOC105607885,RIC1,PEBP4,HOXD1,POLR1E,CASP8,CCDC25,GLRA3,DLX2,RIF1,BAG1,LOC101114849,HR,LOC1…
2	36662901	36664200	32052994	207432142	Milk protein percentage QTL (57738)	GORASP2,RASEF,LOC106990930,WDR33,NPM2,XPO7,PIP5K1B,LOC101112634,NMRK1,RAB3GAP1,CCAR2,LOC106990932,KIAA2012,LOC105611679,RHOBTB2,LOC101121497,CEP44,LOC105609145,LOC106990539,LOC105609818,LOC101109865,POLR2D,LOC101102375,LOC101111773,LOC105611746,CWC22,GNRH1,HNRNPK,LOC101123012,MSTN,LOC101115858,LOC101106395,LOC105607885,RIC1,PEBP4,HOXD1,POLR1E,CASP8,CCDC25,GLRA3,DLX2,RIF1,BAG1,LOC101114849,HR,LOC1…
2	38092301	38093300	32052994	207432142	Milk protein percentage QTL (57738)	GORASP2,RASEF,LOC106990930,WDR33,NPM2,XPO7,PIP5K1B,LOC101112634,NMRK1,RAB3GAP1,CCAR2,LOC106990932,KIAA2012,LOC105611679,RHOBTB2,LOC101121497,CEP44,LOC105609145,LOC106990539,LOC105609818,LOC101109865,POLR2D,LOC101102375,LOC101111773,LOC105611746,CWC22,GNRH1,HNRNPK,LOC101123012,MSTN,LOC101115858,LOC101106395,LOC105607885,RIC1,PEBP4,HOXD1,POLR1E,CASP8,CCDC25,GLRA3,DLX2,RIF1,BAG1,LOC101114849,HR,LOC1…
2	38118501	38120100	32052994	207432142	Milk protein percentage QTL (57738)	GORASP2,RASEF,LOC106990930,WDR33,NPM2,XPO7,PIP5K1B,LOC101112634,NMRK1,RAB3GAP1,CCAR2,LOC106990932,KIAA2012,LOC105611679,RHOBTB2,LOC101121497,CEP44,LOC105609145,LOC106990539,LOC105609818,LOC101109865,POLR2D,LOC101102375,LOC101111773,LOC105611746,CWC22,GNRH1,HNRNPK,LOC101123012,MSTN,LOC101115858,LOC101106395,LOC105607885,RIC1,PEBP4,HOXD1,POLR1E,CASP8,CCDC25,GLRA3,DLX2,RIF1,BAG1,LOC101114849,HR,LOC1…
2	38401701	38404000	32052994	207432142	Milk protein percentage QTL (57738)	GORASP2,RASEF,LOC106990930,WDR33,NPM2,XPO7,PIP5K1B,LOC101112634,NMRK1,RAB3GAP1,CCAR2,LOC106990932,KIAA2012,LOC105611679,RHOBTB2,LOC101121497,CEP44,LOC105609145,LOC106990539,LOC105609818,LOC101109865,POLR2D,LOC101102375,LOC101111773,LOC105611746,CWC22,GNRH1,HNRNPK,LOC101123012,MSTN,LOC101115858,LOC101106395,LOC105607885,RIC1,PEBP4,HOXD1,POLR1E,CASP8,CCDC25,GLRA3,DLX2,RIF1,BAG1,LOC101114849,HR,LOC1…
2	38542701	38543800	32052994	207432142	Milk protein percentage QTL (57738)	GORASP2,RASEF,LOC106990930,WDR33,NPM2,XPO7,PIP5K1B,LOC101112634,NMRK1,RAB3GAP1,CCAR2,LOC106990932,KIAA2012,LOC105611679,RHOBTB2,LOC101121497,CEP44,LOC105609145,LOC106990539,LOC105609818,LOC101109865,POLR2D,LOC101102375,LOC101111773,LOC105611746,CWC22,GNRH1,HNRNPK,LOC101123012,MSTN,LOC101115858,LOC101106395,LOC105607885,RIC1,PEBP4,HOXD1,POLR1E,CASP8,CCDC25,GLRA3,DLX2,RIF1,BAG1,LOC101114849,HR,LOC1…
2	38604401	38607300	32052994	207432142	Milk protein percentage QTL (57738)	GORASP2,RASEF,LOC106990930,WDR33,NPM2,XPO7,PIP5K1B,LOC101112634,NMRK1,RAB3GAP1,CCAR2,LOC106990932,KIAA2012,LOC105611679,RHOBTB2,LOC101121497,CEP44,LOC105609145,LOC106990539,LOC105609818,LOC101109865,POLR2D,LOC101102375,LOC101111773,LOC105611746,CWC22,GNRH1,HNRNPK,LOC101123012,MSTN,LOC101115858,LOC101106395,LOC105607885,RIC1,PEBP4,HOXD1,POLR1E,CASP8,CCDC25,GLRA3,DLX2,RIF1,BAG1,LOC101114849,HR,LOC1…
2	39047001	39048000	32052994	207432142	Milk protein percentage QTL (57738)	GORASP2,RASEF,LOC106990930,WDR33,NPM2,XPO7,PIP5K1B,LOC101112634,NMRK1,RAB3GAP1,CCAR2,LOC106990932,KIAA2012,LOC105611679,RHOBTB2,LOC101121497,CEP44,LOC105609145,LOC106990539,LOC105609818,LOC101109865,POLR2D,LOC101102375,LOC101111773,LOC105611746,CWC22,GNRH1,HNRNPK,LOC101123012,MSTN,LOC101115858,LOC101106395,LOC105607885,RIC1,PEBP4,HOXD1,POLR1E,CASP8,CCDC25,GLRA3,DLX2,RIF1,BAG1,LOC101114849,HR,LOC1…
2	39518201	39519200	32052994	207432142	Milk protein percentage QTL (57738)	GORASP2,RASEF,LOC106990930,WDR33,NPM2,XPO7,PIP5K1B,LOC101112634,NMRK1,RAB3GAP1,CCAR2,LOC106990932,KIAA2012,LOC105611679,RHOBTB2,LOC101121497,CEP44,LOC105609145,LOC106990539,LOC105609818,LOC101109865,POLR2D,LOC101102375,LOC101111773,LOC105611746,CWC22,GNRH1,HNRNPK,LOC101123012,MSTN,LOC101115858,LOC101106395,LOC105607885,RIC1,PEBP4,HOXD1,POLR1E,CASP8,CCDC25,GLRA3,DLX2,RIF1,BAG1,LOC101114849,HR,LOC1…
2	39670601	39673600	32052994	207432142	Milk protein percentage QTL (57738)	GORASP2,RASEF,LOC106990930,WDR33,NPM2,XPO7,PIP5K1B,LOC101112634,NMRK1,RAB3GAP1,CCAR2,LOC106990932,KIAA2012,LOC105611679,RHOBTB2,LOC101121497,CEP44,LOC105609145,LOC106990539,LOC105609818,LOC101109865,POLR2D,LOC101102375,LOC101111773,LOC105611746,CWC22,GNRH1,HNRNPK,LOC101123012,MSTN,LOC101115858,LOC101106395,LOC105607885,RIC1,PEBP4,HOXD1,POLR1E,CASP8,CCDC25,GLRA3,DLX2,RIF1,BAG1,LOC101114849,HR,LOC1…
2	39801001	39802300	32052994	207432142	Milk protein percentage QTL (57738)	GORASP2,RASEF,LOC106990930,WDR33,NPM2,XPO7,PIP5K1B,LOC101112634,NMRK1,RAB3GAP1,CCAR2,LOC106990932,KIAA2012,LOC105611679,RHOBTB2,LOC101121497,CEP44,LOC105609145,LOC106990539,LOC105609818,LOC101109865,POLR2D,LOC101102375,LOC101111773,LOC105611746,CWC22,GNRH1,HNRNPK,LOC101123012,MSTN,LOC101115858,LOC101106395,LOC105607885,RIC1,PEBP4,HOXD1,POLR1E,CASP8,CCDC25,GLRA3,DLX2,RIF1,BAG1,LOC101114849,HR,LOC1…
2	39953301	39954900	32052994	207432142	Milk protein percentage QTL (57738)	GORASP2,RASEF,LOC106990930,WDR33,NPM2,XPO7,PIP5K1B,LOC101112634,NMRK1,RAB3GAP1,CCAR2,LOC106990932,KIAA2012,LOC105611679,RHOBTB2,LOC101121497,CEP44,LOC105609145,LOC106990539,LOC105609818,LOC101109865,POLR2D,LOC101102375,LOC101111773,LOC105611746,CWC22,GNRH1,HNRNPK,LOC101123012,MSTN,LOC101115858,LOC101106395,LOC105607885,RIC1,PEBP4,HOXD1,POLR1E,CASP8,CCDC25,GLRA3,DLX2,RIF1,BAG1,LOC101114849,HR,LOC1…
2	39964201	39965400	32052994	207432142	Milk protein percentage QTL (57738)	GORASP2,RASEF,LOC106990930,WDR33,NPM2,XPO7,PIP5K1B,LOC101112634,NMRK1,RAB3GAP1,CCAR2,LOC106990932,KIAA2012,LOC105611679,RHOBTB2,LOC101121497,CEP44,LOC105609145,LOC106990539,LOC105609818,LOC101109865,POLR2D,LOC101102375,LOC101111773,LOC105611746,CWC22,GNRH1,HNRNPK,LOC101123012,MSTN,LOC101115858,LOC101106395,LOC105607885,RIC1,PEBP4,HOXD1,POLR1E,CASP8,CCDC25,GLRA3,DLX2,RIF1,BAG1,LOC101114849,HR,LOC1…
2	40523601	40525300	32052994	207432142	Milk protein percentage QTL (57738)	GORASP2,RASEF,LOC106990930,WDR33,NPM2,XPO7,PIP5K1B,LOC101112634,NMRK1,RAB3GAP1,CCAR2,LOC106990932,KIAA2012,LOC105611679,RHOBTB2,LOC101121497,CEP44,LOC105609145,LOC106990539,LOC105609818,LOC101109865,POLR2D,LOC101102375,LOC101111773,LOC105611746,CWC22,GNRH1,HNRNPK,LOC101123012,MSTN,LOC101115858,LOC101106395,LOC105607885,RIC1,PEBP4,HOXD1,POLR1E,CASP8,CCDC25,GLRA3,DLX2,RIF1,BAG1,LOC101114849,HR,LOC1…
2	40638201	40649900	32052994	207432142	Milk protein percentage QTL (57738)	GORASP2,RASEF,LOC106990930,WDR33,NPM2,XPO7,PIP5K1B,LOC101112634,NMRK1,RAB3GAP1,CCAR2,LOC106990932,KIAA2012,LOC105611679,RHOBTB2,LOC101121497,CEP44,LOC105609145,LOC106990539,LOC105609818,LOC101109865,POLR2D,LOC101102375,LOC101111773,LOC105611746,CWC22,GNRH1,HNRNPK,LOC101123012,MSTN,LOC101115858,LOC101106395,LOC105607885,RIC1,PEBP4,HOXD1,POLR1E,CASP8,CCDC25,GLRA3,DLX2,RIF1,BAG1,LOC101114849,HR,LOC1…
2	40857501	40862600	32052994	207432142	Milk protein percentage QTL (57738)	GORASP2,RASEF,LOC106990930,WDR33,NPM2,XPO7,PIP5K1B,LOC101112634,NMRK1,RAB3GAP1,CCAR2,LOC106990932,KIAA2012,LOC105611679,RHOBTB2,LOC101121497,CEP44,LOC105609145,LOC106990539,LOC105609818,LOC101109865,POLR2D,LOC101102375,LOC101111773,LOC105611746,CWC22,GNRH1,HNRNPK,LOC101123012,MSTN,LOC101115858,LOC101106395,LOC105607885,RIC1,PEBP4,HOXD1,POLR1E,CASP8,CCDC25,GLRA3,DLX2,RIF1,BAG1,LOC101114849,HR,LOC1…
2	40869501	40871400	32052994	207432142	Milk protein percentage QTL (57738)	GORASP2,RASEF,LOC106990930,WDR33,NPM2,XPO7,PIP5K1B,LOC101112634,NMRK1,RAB3GAP1,CCAR2,LOC106990932,KIAA2012,LOC105611679,RHOBTB2,LOC101121497,CEP44,LOC105609145,LOC106990539,LOC105609818,LOC101109865,POLR2D,LOC101102375,LOC101111773,LOC105611746,CWC22,GNRH1,HNRNPK,LOC101123012,MSTN,LOC101115858,LOC101106395,LOC105607885,RIC1,PEBP4,HOXD1,POLR1E,CASP8,CCDC25,GLRA3,DLX2,RIF1,BAG1,LOC101114849,HR,LOC1…
2	40928201	40929600	32052994	207432142	Milk protein percentage QTL (57738)	GORASP2,RASEF,LOC106990930,WDR33,NPM2,XPO7,PIP5K1B,LOC101112634,NMRK1,RAB3GAP1,CCAR2,LOC106990932,KIAA2012,LOC105611679,RHOBTB2,LOC101121497,CEP44,LOC105609145,LOC106990539,LOC105609818,LOC101109865,POLR2D,LOC101102375,LOC101111773,LOC105611746,CWC22,GNRH1,HNRNPK,LOC101123012,MSTN,LOC101115858,LOC101106395,LOC105607885,RIC1,PEBP4,HOXD1,POLR1E,CASP8,CCDC25,GLRA3,DLX2,RIF1,BAG1,LOC101114849,HR,LOC1…
2	40953801	40955100	32052994	207432142	Milk protein percentage QTL (57738)	GORASP2,RASEF,LOC106990930,WDR33,NPM2,XPO7,PIP5K1B,LOC101112634,NMRK1,RAB3GAP1,CCAR2,LOC106990932,KIAA2012,LOC105611679,RHOBTB2,LOC101121497,CEP44,LOC105609145,LOC106990539,LOC105609818,LOC101109865,POLR2D,LOC101102375,LOC101111773,LOC105611746,CWC22,GNRH1,HNRNPK,LOC101123012,MSTN,LOC101115858,LOC101106395,LOC105607885,RIC1,PEBP4,HOXD1,POLR1E,CASP8,CCDC25,GLRA3,DLX2,RIF1,BAG1,LOC101114849,HR,LOC1…
2	41128101	41130900	32052994	207432142	Milk protein percentage QTL (57738)	GORASP2,RASEF,LOC106990930,WDR33,NPM2,XPO7,PIP5K1B,LOC101112634,NMRK1,RAB3GAP1,CCAR2,LOC106990932,KIAA2012,LOC105611679,RHOBTB2,LOC101121497,CEP44,LOC105609145,LOC106990539,LOC105609818,LOC101109865,POLR2D,LOC101102375,LOC101111773,LOC105611746,CWC22,GNRH1,HNRNPK,LOC101123012,MSTN,LOC101115858,LOC101106395,LOC105607885,RIC1,PEBP4,HOXD1,POLR1E,CASP8,CCDC25,GLRA3,DLX2,RIF1,BAG1,LOC101114849,HR,LOC1…
2	41194201	41195300	32052994	207432142	Milk protein percentage QTL (57738)	GORASP2,RASEF,LOC106990930,WDR33,NPM2,XPO7,PIP5K1B,LOC101112634,NMRK1,RAB3GAP1,CCAR2,LOC106990932,KIAA2012,LOC105611679,RHOBTB2,LOC101121497,CEP44,LOC105609145,LOC106990539,LOC105609818,LOC101109865,POLR2D,LOC101102375,LOC101111773,LOC105611746,CWC22,GNRH1,HNRNPK,LOC101123012,MSTN,LOC101115858,LOC101106395,LOC105607885,RIC1,PEBP4,HOXD1,POLR1E,CASP8,CCDC25,GLRA3,DLX2,RIF1,BAG1,LOC101114849,HR,LOC1…
2	41227901	41229200	32052994	207432142	Milk protein percentage QTL (57738)	GORASP2,RASEF,LOC106990930,WDR33,NPM2,XPO7,PIP5K1B,LOC101112634,NMRK1,RAB3GAP1,CCAR2,LOC106990932,KIAA2012,LOC105611679,RHOBTB2,LOC101121497,CEP44,LOC105609145,LOC106990539,LOC105609818,LOC101109865,POLR2D,LOC101102375,LOC101111773,LOC105611746,CWC22,GNRH1,HNRNPK,LOC101123012,MSTN,LOC101115858,LOC101106395,LOC105607885,RIC1,PEBP4,HOXD1,POLR1E,CASP8,CCDC25,GLRA3,DLX2,RIF1,BAG1,LOC101114849,HR,LOC1…
2	41365701	41366900	32052994	207432142	Milk protein percentage QTL (57738)	GORASP2,RASEF,LOC106990930,WDR33,NPM2,XPO7,PIP5K1B,LOC101112634,NMRK1,RAB3GAP1,CCAR2,LOC106990932,KIAA2012,LOC105611679,RHOBTB2,LOC101121497,CEP44,LOC105609145,LOC106990539,LOC105609818,LOC101109865,POLR2D,LOC101102375,LOC101111773,LOC105611746,CWC22,GNRH1,HNRNPK,LOC101123012,MSTN,LOC101115858,LOC101106395,LOC105607885,RIC1,PEBP4,HOXD1,POLR1E,CASP8,CCDC25,GLRA3,DLX2,RIF1,BAG1,LOC101114849,HR,LOC1…
2	41428601	41434000	32052994	207432142	Milk protein percentage QTL (57738)	GORASP2,RASEF,LOC106990930,WDR33,NPM2,XPO7,PIP5K1B,LOC101112634,NMRK1,RAB3GAP1,CCAR2,LOC106990932,KIAA2012,LOC105611679,RHOBTB2,LOC101121497,CEP44,LOC105609145,LOC106990539,LOC105609818,LOC101109865,POLR2D,LOC101102375,LOC101111773,LOC105611746,CWC22,GNRH1,HNRNPK,LOC101123012,MSTN,LOC101115858,LOC101106395,LOC105607885,RIC1,PEBP4,HOXD1,POLR1E,CASP8,CCDC25,GLRA3,DLX2,RIF1,BAG1,LOC101114849,HR,LOC1…
2	41478701	41479800	32052994	207432142	Milk protein percentage QTL (57738)	GORASP2,RASEF,LOC106990930,WDR33,NPM2,XPO7,PIP5K1B,LOC101112634,NMRK1,RAB3GAP1,CCAR2,LOC106990932,KIAA2012,LOC105611679,RHOBTB2,LOC101121497,CEP44,LOC105609145,LOC106990539,LOC105609818,LOC101109865,POLR2D,LOC101102375,LOC101111773,LOC105611746,CWC22,GNRH1,HNRNPK,LOC101123012,MSTN,LOC101115858,LOC101106395,LOC105607885,RIC1,PEBP4,HOXD1,POLR1E,CASP8,CCDC25,GLRA3,DLX2,RIF1,BAG1,LOC101114849,HR,LOC1…
2	42102401	42106100	32052994	207432142	Milk protein percentage QTL (57738)	GORASP2,RASEF,LOC106990930,WDR33,NPM2,XPO7,PIP5K1B,LOC101112634,NMRK1,RAB3GAP1,CCAR2,LOC106990932,KIAA2012,LOC105611679,RHOBTB2,LOC101121497,CEP44,LOC105609145,LOC106990539,LOC105609818,LOC101109865,POLR2D,LOC101102375,LOC101111773,LOC105611746,CWC22,GNRH1,HNRNPK,LOC101123012,MSTN,LOC101115858,LOC101106395,LOC105607885,RIC1,PEBP4,HOXD1,POLR1E,CASP8,CCDC25,GLRA3,DLX2,RIF1,BAG1,LOC101114849,HR,LOC1…
2	42396301	42412100	32052994	207432142	Milk protein percentage QTL (57738)	GORASP2,RASEF,LOC106990930,WDR33,NPM2,XPO7,PIP5K1B,LOC101112634,NMRK1,RAB3GAP1,CCAR2,LOC106990932,KIAA2012,LOC105611679,RHOBTB2,LOC101121497,CEP44,LOC105609145,LOC106990539,LOC105609818,LOC101109865,POLR2D,LOC101102375,LOC101111773,LOC105611746,CWC22,GNRH1,HNRNPK,LOC101123012,MSTN,LOC101115858,LOC101106395,LOC105607885,RIC1,PEBP4,HOXD1,POLR1E,CASP8,CCDC25,GLRA3,DLX2,RIF1,BAG1,LOC101114849,HR,LOC1…
2	42413701	42418300	32052994	207432142	Milk protein percentage QTL (57738)	GORASP2,RASEF,LOC106990930,WDR33,NPM2,XPO7,PIP5K1B,LOC101112634,NMRK1,RAB3GAP1,CCAR2,LOC106990932,KIAA2012,LOC105611679,RHOBTB2,LOC101121497,CEP44,LOC105609145,LOC106990539,LOC105609818,LOC101109865,POLR2D,LOC101102375,LOC101111773,LOC105611746,CWC22,GNRH1,HNRNPK,LOC101123012,MSTN,LOC101115858,LOC101106395,LOC105607885,RIC1,PEBP4,HOXD1,POLR1E,CASP8,CCDC25,GLRA3,DLX2,RIF1,BAG1,LOC101114849,HR,LOC1…
2	42418401	42428300	32052994	207432142	Milk protein percentage QTL (57738)	GORASP2,RASEF,LOC106990930,WDR33,NPM2,XPO7,PIP5K1B,LOC101112634,NMRK1,RAB3GAP1,CCAR2,LOC106990932,KIAA2012,LOC105611679,RHOBTB2,LOC101121497,CEP44,LOC105609145,LOC106990539,LOC105609818,LOC101109865,POLR2D,LOC101102375,LOC101111773,LOC105611746,CWC22,GNRH1,HNRNPK,LOC101123012,MSTN,LOC101115858,LOC101106395,LOC105607885,RIC1,PEBP4,HOXD1,POLR1E,CASP8,CCDC25,GLRA3,DLX2,RIF1,BAG1,LOC101114849,HR,LOC1…
2	43135701	43137800	32052994	207432142	Milk protein percentage QTL (57738)	GORASP2,RASEF,LOC106990930,WDR33,NPM2,XPO7,PIP5K1B,LOC101112634,NMRK1,RAB3GAP1,CCAR2,LOC106990932,KIAA2012,LOC105611679,RHOBTB2,LOC101121497,CEP44,LOC105609145,LOC106990539,LOC105609818,LOC101109865,POLR2D,LOC101102375,LOC101111773,LOC105611746,CWC22,GNRH1,HNRNPK,LOC101123012,MSTN,LOC101115858,LOC101106395,LOC105607885,RIC1,PEBP4,HOXD1,POLR1E,CASP8,CCDC25,GLRA3,DLX2,RIF1,BAG1,LOC101114849,HR,LOC1…
2	44293301	44294400	32052994	207432142	Milk protein percentage QTL (57738)	GORASP2,RASEF,LOC106990930,WDR33,NPM2,XPO7,PIP5K1B,LOC101112634,NMRK1,RAB3GAP1,CCAR2,LOC106990932,KIAA2012,LOC105611679,RHOBTB2,LOC101121497,CEP44,LOC105609145,LOC106990539,LOC105609818,LOC101109865,POLR2D,LOC101102375,LOC101111773,LOC105611746,CWC22,GNRH1,HNRNPK,LOC101123012,MSTN,LOC101115858,LOC101106395,LOC105607885,RIC1,PEBP4,HOXD1,POLR1E,CASP8,CCDC25,GLRA3,DLX2,RIF1,BAG1,LOC101114849,HR,LOC1…
2	44537801	44542900	32052994	207432142	Milk protein percentage QTL (57738)	GORASP2,RASEF,LOC106990930,WDR33,NPM2,XPO7,PIP5K1B,LOC101112634,NMRK1,RAB3GAP1,CCAR2,LOC106990932,KIAA2012,LOC105611679,RHOBTB2,LOC101121497,CEP44,LOC105609145,LOC106990539,LOC105609818,LOC101109865,POLR2D,LOC101102375,LOC101111773,LOC105611746,CWC22,GNRH1,HNRNPK,LOC101123012,MSTN,LOC101115858,LOC101106395,LOC105607885,RIC1,PEBP4,HOXD1,POLR1E,CASP8,CCDC25,GLRA3,DLX2,RIF1,BAG1,LOC101114849,HR,LOC1…
2	44649101	44650100	32052994	207432142	Milk protein percentage QTL (57738)	GORASP2,RASEF,LOC106990930,WDR33,NPM2,XPO7,PIP5K1B,LOC101112634,NMRK1,RAB3GAP1,CCAR2,LOC106990932,KIAA2012,LOC105611679,RHOBTB2,LOC101121497,CEP44,LOC105609145,LOC106990539,LOC105609818,LOC101109865,POLR2D,LOC101102375,LOC101111773,LOC105611746,CWC22,GNRH1,HNRNPK,LOC101123012,MSTN,LOC101115858,LOC101106395,LOC105607885,RIC1,PEBP4,HOXD1,POLR1E,CASP8,CCDC25,GLRA3,DLX2,RIF1,BAG1,LOC101114849,HR,LOC1…
2	44980201	44982200	32052994	207432142	Milk protein percentage QTL (57738)	GORASP2,RASEF,LOC106990930,WDR33,NPM2,XPO7,PIP5K1B,LOC101112634,NMRK1,RAB3GAP1,CCAR2,LOC106990932,KIAA2012,LOC105611679,RHOBTB2,LOC101121497,CEP44,LOC105609145,LOC106990539,LOC105609818,LOC101109865,POLR2D,LOC101102375,LOC101111773,LOC105611746,CWC22,GNRH1,HNRNPK,LOC101123012,MSTN,LOC101115858,LOC101106395,LOC105607885,RIC1,PEBP4,HOXD1,POLR1E,CASP8,CCDC25,GLRA3,DLX2,RIF1,BAG1,LOC101114849,HR,LOC1…
2	45140301	45141700	32052994	207432142	Milk protein percentage QTL (57738)	GORASP2,RASEF,LOC106990930,WDR33,NPM2,XPO7,PIP5K1B,LOC101112634,NMRK1,RAB3GAP1,CCAR2,LOC106990932,KIAA2012,LOC105611679,RHOBTB2,LOC101121497,CEP44,LOC105609145,LOC106990539,LOC105609818,LOC101109865,POLR2D,LOC101102375,LOC101111773,LOC105611746,CWC22,GNRH1,HNRNPK,LOC101123012,MSTN,LOC101115858,LOC101106395,LOC105607885,RIC1,PEBP4,HOXD1,POLR1E,CASP8,CCDC25,GLRA3,DLX2,RIF1,BAG1,LOC101114849,HR,LOC1…
2	45413901	45415300	32052994	207432142	Milk protein percentage QTL (57738)	GORASP2,RASEF,LOC106990930,WDR33,NPM2,XPO7,PIP5K1B,LOC101112634,NMRK1,RAB3GAP1,CCAR2,LOC106990932,KIAA2012,LOC105611679,RHOBTB2,LOC101121497,CEP44,LOC105609145,LOC106990539,LOC105609818,LOC101109865,POLR2D,LOC101102375,LOC101111773,LOC105611746,CWC22,GNRH1,HNRNPK,LOC101123012,MSTN,LOC101115858,LOC101106395,LOC105607885,RIC1,PEBP4,HOXD1,POLR1E,CASP8,CCDC25,GLRA3,DLX2,RIF1,BAG1,LOC101114849,HR,LOC1…
2	46040501	46045300	32052994	207432142	Milk protein percentage QTL (57738)	GORASP2,RASEF,LOC106990930,WDR33,NPM2,XPO7,PIP5K1B,LOC101112634,NMRK1,RAB3GAP1,CCAR2,LOC106990932,KIAA2012,LOC105611679,RHOBTB2,LOC101121497,CEP44,LOC105609145,LOC106990539,LOC105609818,LOC101109865,POLR2D,LOC101102375,LOC101111773,LOC105611746,CWC22,GNRH1,HNRNPK,LOC101123012,MSTN,LOC101115858,LOC101106395,LOC105607885,RIC1,PEBP4,HOXD1,POLR1E,CASP8,CCDC25,GLRA3,DLX2,RIF1,BAG1,LOC101114849,HR,LOC1…
2	46686201	46687300	32052994	207432142	Milk protein percentage QTL (57738)	GORASP2,RASEF,LOC106990930,WDR33,NPM2,XPO7,PIP5K1B,LOC101112634,NMRK1,RAB3GAP1,CCAR2,LOC106990932,KIAA2012,LOC105611679,RHOBTB2,LOC101121497,CEP44,LOC105609145,LOC106990539,LOC105609818,LOC101109865,POLR2D,LOC101102375,LOC101111773,LOC105611746,CWC22,GNRH1,HNRNPK,LOC101123012,MSTN,LOC101115858,LOC101106395,LOC105607885,RIC1,PEBP4,HOXD1,POLR1E,CASP8,CCDC25,GLRA3,DLX2,RIF1,BAG1,LOC101114849,HR,LOC1…
2	47124401	47125600	32052994	207432142	Milk protein percentage QTL (57738)	GORASP2,RASEF,LOC106990930,WDR33,NPM2,XPO7,PIP5K1B,LOC101112634,NMRK1,RAB3GAP1,CCAR2,LOC106990932,KIAA2012,LOC105611679,RHOBTB2,LOC101121497,CEP44,LOC105609145,LOC106990539,LOC105609818,LOC101109865,POLR2D,LOC101102375,LOC101111773,LOC105611746,CWC22,GNRH1,HNRNPK,LOC101123012,MSTN,LOC101115858,LOC101106395,LOC105607885,RIC1,PEBP4,HOXD1,POLR1E,CASP8,CCDC25,GLRA3,DLX2,RIF1,BAG1,LOC101114849,HR,LOC1…
2	47153001	47182900	32052994	207432142	Milk protein percentage QTL (57738)	GORASP2,RASEF,LOC106990930,WDR33,NPM2,XPO7,PIP5K1B,LOC101112634,NMRK1,RAB3GAP1,CCAR2,LOC106990932,KIAA2012,LOC105611679,RHOBTB2,LOC101121497,CEP44,LOC105609145,LOC106990539,LOC105609818,LOC101109865,POLR2D,LOC101102375,LOC101111773,LOC105611746,CWC22,GNRH1,HNRNPK,LOC101123012,MSTN,LOC101115858,LOC101106395,LOC105607885,RIC1,PEBP4,HOXD1,POLR1E,CASP8,CCDC25,GLRA3,DLX2,RIF1,BAG1,LOC101114849,HR,LOC1…
2	47335301	47336300	32052994	207432142	Milk protein percentage QTL (57738)	GORASP2,RASEF,LOC106990930,WDR33,NPM2,XPO7,PIP5K1B,LOC101112634,NMRK1,RAB3GAP1,CCAR2,LOC106990932,KIAA2012,LOC105611679,RHOBTB2,LOC101121497,CEP44,LOC105609145,LOC106990539,LOC105609818,LOC101109865,POLR2D,LOC101102375,LOC101111773,LOC105611746,CWC22,GNRH1,HNRNPK,LOC101123012,MSTN,LOC101115858,LOC101106395,LOC105607885,RIC1,PEBP4,HOXD1,POLR1E,CASP8,CCDC25,GLRA3,DLX2,RIF1,BAG1,LOC101114849,HR,LOC1…
2	48058701	48060100	47490104	65053443	Milk fat yield QTL (57736)	ERP44,TMEM2,LOC105607745,LOC101120137,NMRK1,LOC101111526,LOC106990932,TRMO,NANS,LOC101112203,SEC61B,COL15A1,LOC106990897,LOC101111773,TMOD1,LOC101123012,POLR1E,TPM2,LOC101106310,FAM166B,LOC101114849,LOC101107338,TRIM14,EXOSC3,ALDH1B1,NCBP1,TBC1D2,LOC105607616,TLE4,LOC106990936,RORB,LOC101109680,FOXE1,CCDC107,TRNAC-GCA,LOC106990384,CORO2A,LOC101110212,LOC105607661,LOC101121827,ABHD17B,ZCCHC7,TMEM8…
2	48065101	48067600	47490104	65053443	Milk fat yield QTL (57736)	ERP44,TMEM2,LOC105607745,LOC101120137,NMRK1,LOC101111526,LOC106990932,TRMO,NANS,LOC101112203,SEC61B,COL15A1,LOC106990897,LOC101111773,TMOD1,LOC101123012,POLR1E,TPM2,LOC101106310,FAM166B,LOC101114849,LOC101107338,TRIM14,EXOSC3,ALDH1B1,NCBP1,TBC1D2,LOC105607616,TLE4,LOC106990936,RORB,LOC101109680,FOXE1,CCDC107,TRNAC-GCA,LOC106990384,CORO2A,LOC101110212,LOC105607661,LOC101121827,ABHD17B,ZCCHC7,TMEM8…
2	48117301	48118600	47490104	65053443	Milk fat yield QTL (57736)	ERP44,TMEM2,LOC105607745,LOC101120137,NMRK1,LOC101111526,LOC106990932,TRMO,NANS,LOC101112203,SEC61B,COL15A1,LOC106990897,LOC101111773,TMOD1,LOC101123012,POLR1E,TPM2,LOC101106310,FAM166B,LOC101114849,LOC101107338,TRIM14,EXOSC3,ALDH1B1,NCBP1,TBC1D2,LOC105607616,TLE4,LOC106990936,RORB,LOC101109680,FOXE1,CCDC107,TRNAC-GCA,LOC106990384,CORO2A,LOC101110212,LOC105607661,LOC101121827,ABHD17B,ZCCHC7,TMEM8…
2	48373501	48374600	47490104	65053443	Milk fat yield QTL (57736)	ERP44,TMEM2,LOC105607745,LOC101120137,NMRK1,LOC101111526,LOC106990932,TRMO,NANS,LOC101112203,SEC61B,COL15A1,LOC106990897,LOC101111773,TMOD1,LOC101123012,POLR1E,TPM2,LOC101106310,FAM166B,LOC101114849,LOC101107338,TRIM14,EXOSC3,ALDH1B1,NCBP1,TBC1D2,LOC105607616,TLE4,LOC106990936,RORB,LOC101109680,FOXE1,CCDC107,TRNAC-GCA,LOC106990384,CORO2A,LOC101110212,LOC105607661,LOC101121827,ABHD17B,ZCCHC7,TMEM8…
2	49861601	49863000	47490104	65053443	Milk fat yield QTL (57736)	ERP44,TMEM2,LOC105607745,LOC101120137,NMRK1,LOC101111526,LOC106990932,TRMO,NANS,LOC101112203,SEC61B,COL15A1,LOC106990897,LOC101111773,TMOD1,LOC101123012,POLR1E,TPM2,LOC101106310,FAM166B,LOC101114849,LOC101107338,TRIM14,EXOSC3,ALDH1B1,NCBP1,TBC1D2,LOC105607616,TLE4,LOC106990936,RORB,LOC101109680,FOXE1,CCDC107,TRNAC-GCA,LOC106990384,CORO2A,LOC101110212,LOC105607661,LOC101121827,ABHD17B,ZCCHC7,TMEM8…
2	49891901	49892900	47490104	65053443	Milk fat yield QTL (57736)	ERP44,TMEM2,LOC105607745,LOC101120137,NMRK1,LOC101111526,LOC106990932,TRMO,NANS,LOC101112203,SEC61B,COL15A1,LOC106990897,LOC101111773,TMOD1,LOC101123012,POLR1E,TPM2,LOC101106310,FAM166B,LOC101114849,LOC101107338,TRIM14,EXOSC3,ALDH1B1,NCBP1,TBC1D2,LOC105607616,TLE4,LOC106990936,RORB,LOC101109680,FOXE1,CCDC107,TRNAC-GCA,LOC106990384,CORO2A,LOC101110212,LOC105607661,LOC101121827,ABHD17B,ZCCHC7,TMEM8…
2	49996501	49997500	47490104	65053443	Milk fat yield QTL (57736)	ERP44,TMEM2,LOC105607745,LOC101120137,NMRK1,LOC101111526,LOC106990932,TRMO,NANS,LOC101112203,SEC61B,COL15A1,LOC106990897,LOC101111773,TMOD1,LOC101123012,POLR1E,TPM2,LOC101106310,FAM166B,LOC101114849,LOC101107338,TRIM14,EXOSC3,ALDH1B1,NCBP1,TBC1D2,LOC105607616,TLE4,LOC106990936,RORB,LOC101109680,FOXE1,CCDC107,TRNAC-GCA,LOC106990384,CORO2A,LOC101110212,LOC105607661,LOC101121827,ABHD17B,ZCCHC7,TMEM8…
2	50700901	50702300	47490104	65053443	Milk fat yield QTL (57736)	ERP44,TMEM2,LOC105607745,LOC101120137,NMRK1,LOC101111526,LOC106990932,TRMO,NANS,LOC101112203,SEC61B,COL15A1,LOC106990897,LOC101111773,TMOD1,LOC101123012,POLR1E,TPM2,LOC101106310,FAM166B,LOC101114849,LOC101107338,TRIM14,EXOSC3,ALDH1B1,NCBP1,TBC1D2,LOC105607616,TLE4,LOC106990936,RORB,LOC101109680,FOXE1,CCDC107,TRNAC-GCA,LOC106990384,CORO2A,LOC101110212,LOC105607661,LOC101121827,ABHD17B,ZCCHC7,TMEM8…
2	51422601	51428000	47490104	65053443	Milk fat yield QTL (57736)	ERP44,TMEM2,LOC105607745,LOC101120137,NMRK1,LOC101111526,LOC106990932,TRMO,NANS,LOC101112203,SEC61B,COL15A1,LOC106990897,LOC101111773,TMOD1,LOC101123012,POLR1E,TPM2,LOC101106310,FAM166B,LOC101114849,LOC101107338,TRIM14,EXOSC3,ALDH1B1,NCBP1,TBC1D2,LOC105607616,TLE4,LOC106990936,RORB,LOC101109680,FOXE1,CCDC107,TRNAC-GCA,LOC106990384,CORO2A,LOC101110212,LOC105607661,LOC101121827,ABHD17B,ZCCHC7,TMEM8…
2	53014101	53016500	51659578	55575497	Milk fat yield QTL (57720)	TMEM8B,LOC105611721,GLIPR2,CLTA,LOC105607745,MELK,SPAG8,MSMP,C2H9orf131,RECK,DNAJB5,LOC101112203,HINT2,TESK1,LOC105611598,UNC13B,CCIN,LOC101111773,LOC105607664,TRNAE-CUC,LOC101110483,RGP1,LOC101117475,RUSC2,LOC101108371,LOC101110740,TPM2,LOC101106310,LOC101111518,GNE,CD72,LOC101111001,FAM166B,LOC105607732,FAM214B,LOC101110212,LOC101107338,LOC101111253,PIGO,ARHGEF39,NPR2,GBA2,LOC101109422,RNF38,CR…
2	53260001	53272800	51659578	55575497	Milk fat yield QTL (57720)	TMEM8B,LOC105611721,GLIPR2,CLTA,LOC105607745,MELK,SPAG8,MSMP,C2H9orf131,RECK,DNAJB5,LOC101112203,HINT2,TESK1,LOC105611598,UNC13B,CCIN,LOC101111773,LOC105607664,TRNAE-CUC,LOC101110483,RGP1,LOC101117475,RUSC2,LOC101108371,LOC101110740,TPM2,LOC101106310,LOC101111518,GNE,CD72,LOC101111001,FAM166B,LOC105607732,FAM214B,LOC101110212,LOC101107338,LOC101111253,PIGO,ARHGEF39,NPR2,GBA2,LOC101109422,RNF38,CR…
2	53274001	53275900	51659578	55575497	Milk fat yield QTL (57720)	TMEM8B,LOC105611721,GLIPR2,CLTA,LOC105607745,MELK,SPAG8,MSMP,C2H9orf131,RECK,DNAJB5,LOC101112203,HINT2,TESK1,LOC105611598,UNC13B,CCIN,LOC101111773,LOC105607664,TRNAE-CUC,LOC101110483,RGP1,LOC101117475,RUSC2,LOC101108371,LOC101110740,TPM2,LOC101106310,LOC101111518,GNE,CD72,LOC101111001,FAM166B,LOC105607732,FAM214B,LOC101110212,LOC101107338,LOC101111253,PIGO,ARHGEF39,NPR2,GBA2,LOC101109422,RNF38,CR…
2	53276101	53281700	51659578	55575497	Milk fat yield QTL (57720)	TMEM8B,LOC105611721,GLIPR2,CLTA,LOC105607745,MELK,SPAG8,MSMP,C2H9orf131,RECK,DNAJB5,LOC101112203,HINT2,TESK1,LOC105611598,UNC13B,CCIN,LOC101111773,LOC105607664,TRNAE-CUC,LOC101110483,RGP1,LOC101117475,RUSC2,LOC101108371,LOC101110740,TPM2,LOC101106310,LOC101111518,GNE,CD72,LOC101111001,FAM166B,LOC105607732,FAM214B,LOC101110212,LOC101107338,LOC101111253,PIGO,ARHGEF39,NPR2,GBA2,LOC101109422,RNF38,CR…
2	53282701	53287800	51659578	55575497	Milk fat yield QTL (57720)	TMEM8B,LOC105611721,GLIPR2,CLTA,LOC105607745,MELK,SPAG8,MSMP,C2H9orf131,RECK,DNAJB5,LOC101112203,HINT2,TESK1,LOC105611598,UNC13B,CCIN,LOC101111773,LOC105607664,TRNAE-CUC,LOC101110483,RGP1,LOC101117475,RUSC2,LOC101108371,LOC101110740,TPM2,LOC101106310,LOC101111518,GNE,CD72,LOC101111001,FAM166B,LOC105607732,FAM214B,LOC101110212,LOC101107338,LOC101111253,PIGO,ARHGEF39,NPR2,GBA2,LOC101109422,RNF38,CR…
2	53527101	53528900	51659578	55575497	Milk fat yield QTL (57720)	TMEM8B,LOC105611721,GLIPR2,CLTA,LOC105607745,MELK,SPAG8,MSMP,C2H9orf131,RECK,DNAJB5,LOC101112203,HINT2,TESK1,LOC105611598,UNC13B,CCIN,LOC101111773,LOC105607664,TRNAE-CUC,LOC101110483,RGP1,LOC101117475,RUSC2,LOC101108371,LOC101110740,TPM2,LOC101106310,LOC101111518,GNE,CD72,LOC101111001,FAM166B,LOC105607732,FAM214B,LOC101110212,LOC101107338,LOC101111253,PIGO,ARHGEF39,NPR2,GBA2,LOC101109422,RNF38,CR…
2	53808201	53809600	51659578	55575497	Milk fat yield QTL (57720)	TMEM8B,LOC105611721,GLIPR2,CLTA,LOC105607745,MELK,SPAG8,MSMP,C2H9orf131,RECK,DNAJB5,LOC101112203,HINT2,TESK1,LOC105611598,UNC13B,CCIN,LOC101111773,LOC105607664,TRNAE-CUC,LOC101110483,RGP1,LOC101117475,RUSC2,LOC101108371,LOC101110740,TPM2,LOC101106310,LOC101111518,GNE,CD72,LOC101111001,FAM166B,LOC105607732,FAM214B,LOC101110212,LOC101107338,LOC101111253,PIGO,ARHGEF39,NPR2,GBA2,LOC101109422,RNF38,CR…
2	53884801	53886300	51659578	55575497	Milk fat yield QTL (57720)	TMEM8B,LOC105611721,GLIPR2,CLTA,LOC105607745,MELK,SPAG8,MSMP,C2H9orf131,RECK,DNAJB5,LOC101112203,HINT2,TESK1,LOC105611598,UNC13B,CCIN,LOC101111773,LOC105607664,TRNAE-CUC,LOC101110483,RGP1,LOC101117475,RUSC2,LOC101108371,LOC101110740,TPM2,LOC101106310,LOC101111518,GNE,CD72,LOC101111001,FAM166B,LOC105607732,FAM214B,LOC101110212,LOC101107338,LOC101111253,PIGO,ARHGEF39,NPR2,GBA2,LOC101109422,RNF38,CR…
2	53972501	53976900	51659578	55575497	Milk fat yield QTL (57720)	TMEM8B,LOC105611721,GLIPR2,CLTA,LOC105607745,MELK,SPAG8,MSMP,C2H9orf131,RECK,DNAJB5,LOC101112203,HINT2,TESK1,LOC105611598,UNC13B,CCIN,LOC101111773,LOC105607664,TRNAE-CUC,LOC101110483,RGP1,LOC101117475,RUSC2,LOC101108371,LOC101110740,TPM2,LOC101106310,LOC101111518,GNE,CD72,LOC101111001,FAM166B,LOC105607732,FAM214B,LOC101110212,LOC101107338,LOC101111253,PIGO,ARHGEF39,NPR2,GBA2,LOC101109422,RNF38,CR…
2	53977001	53979100	51659578	55575497	Milk fat yield QTL (57720)	TMEM8B,LOC105611721,GLIPR2,CLTA,LOC105607745,MELK,SPAG8,MSMP,C2H9orf131,RECK,DNAJB5,LOC101112203,HINT2,TESK1,LOC105611598,UNC13B,CCIN,LOC101111773,LOC105607664,TRNAE-CUC,LOC101110483,RGP1,LOC101117475,RUSC2,LOC101108371,LOC101110740,TPM2,LOC101106310,LOC101111518,GNE,CD72,LOC101111001,FAM166B,LOC105607732,FAM214B,LOC101110212,LOC101107338,LOC101111253,PIGO,ARHGEF39,NPR2,GBA2,LOC101109422,RNF38,CR…
2	54072601	54073700	51659578	55575497	Milk fat yield QTL (57720)	TMEM8B,LOC105611721,GLIPR2,CLTA,LOC105607745,MELK,SPAG8,MSMP,C2H9orf131,RECK,DNAJB5,LOC101112203,HINT2,TESK1,LOC105611598,UNC13B,CCIN,LOC101111773,LOC105607664,TRNAE-CUC,LOC101110483,RGP1,LOC101117475,RUSC2,LOC101108371,LOC101110740,TPM2,LOC101106310,LOC101111518,GNE,CD72,LOC101111001,FAM166B,LOC105607732,FAM214B,LOC101110212,LOC101107338,LOC101111253,PIGO,ARHGEF39,NPR2,GBA2,LOC101109422,RNF38,CR…
2	54167201	54168300	51659578	55575497	Milk fat yield QTL (57720)	TMEM8B,LOC105611721,GLIPR2,CLTA,LOC105607745,MELK,SPAG8,MSMP,C2H9orf131,RECK,DNAJB5,LOC101112203,HINT2,TESK1,LOC105611598,UNC13B,CCIN,LOC101111773,LOC105607664,TRNAE-CUC,LOC101110483,RGP1,LOC101117475,RUSC2,LOC101108371,LOC101110740,TPM2,LOC101106310,LOC101111518,GNE,CD72,LOC101111001,FAM166B,LOC105607732,FAM214B,LOC101110212,LOC101107338,LOC101111253,PIGO,ARHGEF39,NPR2,GBA2,LOC101109422,RNF38,CR…
2	54564001	54566900	51659578	55575497	Milk fat yield QTL (57720)	TMEM8B,LOC105611721,GLIPR2,CLTA,LOC105607745,MELK,SPAG8,MSMP,C2H9orf131,RECK,DNAJB5,LOC101112203,HINT2,TESK1,LOC105611598,UNC13B,CCIN,LOC101111773,LOC105607664,TRNAE-CUC,LOC101110483,RGP1,LOC101117475,RUSC2,LOC101108371,LOC101110740,TPM2,LOC101106310,LOC101111518,GNE,CD72,LOC101111001,FAM166B,LOC105607732,FAM214B,LOC101110212,LOC101107338,LOC101111253,PIGO,ARHGEF39,NPR2,GBA2,LOC101109422,RNF38,CR…
2	55267401	55268600	51659578	55575497	Milk fat yield QTL (57720)	TMEM8B,LOC105611721,GLIPR2,CLTA,LOC105607745,MELK,SPAG8,MSMP,C2H9orf131,RECK,DNAJB5,LOC101112203,HINT2,TESK1,LOC105611598,UNC13B,CCIN,LOC101111773,LOC105607664,TRNAE-CUC,LOC101110483,RGP1,LOC101117475,RUSC2,LOC101108371,LOC101110740,TPM2,LOC101106310,LOC101111518,GNE,CD72,LOC101111001,FAM166B,LOC105607732,FAM214B,LOC101110212,LOC101107338,LOC101111253,PIGO,ARHGEF39,NPR2,GBA2,LOC101109422,RNF38,CR…
2	55268901	55280300	51659578	55575497	Milk fat yield QTL (57720)	TMEM8B,LOC105611721,GLIPR2,CLTA,LOC105607745,MELK,SPAG8,MSMP,C2H9orf131,RECK,DNAJB5,LOC101112203,HINT2,TESK1,LOC105611598,UNC13B,CCIN,LOC101111773,LOC105607664,TRNAE-CUC,LOC101110483,RGP1,LOC101117475,RUSC2,LOC101108371,LOC101110740,TPM2,LOC101106310,LOC101111518,GNE,CD72,LOC101111001,FAM166B,LOC105607732,FAM214B,LOC101110212,LOC101107338,LOC101111253,PIGO,ARHGEF39,NPR2,GBA2,LOC101109422,RNF38,CR…
2	55395101	55397800	51659578	55575497	Milk fat yield QTL (57720)	TMEM8B,LOC105611721,GLIPR2,CLTA,LOC105607745,MELK,SPAG8,MSMP,C2H9orf131,RECK,DNAJB5,LOC101112203,HINT2,TESK1,LOC105611598,UNC13B,CCIN,LOC101111773,LOC105607664,TRNAE-CUC,LOC101110483,RGP1,LOC101117475,RUSC2,LOC101108371,LOC101110740,TPM2,LOC101106310,LOC101111518,GNE,CD72,LOC101111001,FAM166B,LOC105607732,FAM214B,LOC101110212,LOC101107338,LOC101111253,PIGO,ARHGEF39,NPR2,GBA2,LOC101109422,RNF38,CR…
2	55736701	55742200	52042919	55767698	Milk Yield QTL (57718)	TMEM8B,LOC105611721,GLIPR2,CLTA,LOC105607745,SPAG8,MSMP,C2H9orf131,RECK,DNAJB5,LOC101112203,HINT2,TESK1,LOC105611598,UNC13B,CCIN,LOC101111773,LOC105607664,TRNAE-CUC,LOC101110483,RGP1,LOC101117475,LOC101119878,RUSC2,LOC101108371,LOC101110740,TPM2,LOC101111518,GNE,CD72,LOC101111001,FAM166B,LOC105607732,LOC105607767,FAM214B,LOC101110212,LOC101107338,LOC101111253,PIGO,ARHGEF39,NPR2,GBA2,LOC101109422,…
2	55854101	55855500	47490104	65053443	Milk fat yield QTL (57736)	ERP44,TMEM2,LOC105607745,LOC101120137,NMRK1,LOC101111526,LOC106990932,TRMO,NANS,LOC101112203,SEC61B,COL15A1,LOC106990897,LOC101111773,TMOD1,LOC101123012,POLR1E,TPM2,LOC101106310,FAM166B,LOC101114849,LOC101107338,TRIM14,EXOSC3,ALDH1B1,NCBP1,TBC1D2,LOC105607616,TLE4,LOC106990936,RORB,LOC101109680,FOXE1,CCDC107,TRNAC-GCA,LOC106990384,CORO2A,LOC101110212,LOC105607661,LOC101121827,ABHD17B,ZCCHC7,TMEM8…
2	55969301	55970900	47490104	65053443	Milk fat yield QTL (57736)	ERP44,TMEM2,LOC105607745,LOC101120137,NMRK1,LOC101111526,LOC106990932,TRMO,NANS,LOC101112203,SEC61B,COL15A1,LOC106990897,LOC101111773,TMOD1,LOC101123012,POLR1E,TPM2,LOC101106310,FAM166B,LOC101114849,LOC101107338,TRIM14,EXOSC3,ALDH1B1,NCBP1,TBC1D2,LOC105607616,TLE4,LOC106990936,RORB,LOC101109680,FOXE1,CCDC107,TRNAC-GCA,LOC106990384,CORO2A,LOC101110212,LOC105607661,LOC101121827,ABHD17B,ZCCHC7,TMEM8…
2	56037001	56039600	47490104	65053443	Milk fat yield QTL (57736)	ERP44,TMEM2,LOC105607745,LOC101120137,NMRK1,LOC101111526,LOC106990932,TRMO,NANS,LOC101112203,SEC61B,COL15A1,LOC106990897,LOC101111773,TMOD1,LOC101123012,POLR1E,TPM2,LOC101106310,FAM166B,LOC101114849,LOC101107338,TRIM14,EXOSC3,ALDH1B1,NCBP1,TBC1D2,LOC105607616,TLE4,LOC106990936,RORB,LOC101109680,FOXE1,CCDC107,TRNAC-GCA,LOC106990384,CORO2A,LOC101110212,LOC105607661,LOC101121827,ABHD17B,ZCCHC7,TMEM8…
2	56182601	56183700	47490104	65053443	Milk fat yield QTL (57736)	ERP44,TMEM2,LOC105607745,LOC101120137,NMRK1,LOC101111526,LOC106990932,TRMO,NANS,LOC101112203,SEC61B,COL15A1,LOC106990897,LOC101111773,TMOD1,LOC101123012,POLR1E,TPM2,LOC101106310,FAM166B,LOC101114849,LOC101107338,TRIM14,EXOSC3,ALDH1B1,NCBP1,TBC1D2,LOC105607616,TLE4,LOC106990936,RORB,LOC101109680,FOXE1,CCDC107,TRNAC-GCA,LOC106990384,CORO2A,LOC101110212,LOC105607661,LOC101121827,ABHD17B,ZCCHC7,TMEM8…
2	56389901	56391500	47490104	65053443	Milk fat yield QTL (57736)	ERP44,TMEM2,LOC105607745,LOC101120137,NMRK1,LOC101111526,LOC106990932,TRMO,NANS,LOC101112203,SEC61B,COL15A1,LOC106990897,LOC101111773,TMOD1,LOC101123012,POLR1E,TPM2,LOC101106310,FAM166B,LOC101114849,LOC101107338,TRIM14,EXOSC3,ALDH1B1,NCBP1,TBC1D2,LOC105607616,TLE4,LOC106990936,RORB,LOC101109680,FOXE1,CCDC107,TRNAC-GCA,LOC106990384,CORO2A,LOC101110212,LOC105607661,LOC101121827,ABHD17B,ZCCHC7,TMEM8…
2	56570901	56573200	47490104	65053443	Milk fat yield QTL (57736)	ERP44,TMEM2,LOC105607745,LOC101120137,NMRK1,LOC101111526,LOC106990932,TRMO,NANS,LOC101112203,SEC61B,COL15A1,LOC106990897,LOC101111773,TMOD1,LOC101123012,POLR1E,TPM2,LOC101106310,FAM166B,LOC101114849,LOC101107338,TRIM14,EXOSC3,ALDH1B1,NCBP1,TBC1D2,LOC105607616,TLE4,LOC106990936,RORB,LOC101109680,FOXE1,CCDC107,TRNAC-GCA,LOC106990384,CORO2A,LOC101110212,LOC105607661,LOC101121827,ABHD17B,ZCCHC7,TMEM8…
2	57061401	57062700	47490104	65053443	Milk fat yield QTL (57736)	ERP44,TMEM2,LOC105607745,LOC101120137,NMRK1,LOC101111526,LOC106990932,TRMO,NANS,LOC101112203,SEC61B,COL15A1,LOC106990897,LOC101111773,TMOD1,LOC101123012,POLR1E,TPM2,LOC101106310,FAM166B,LOC101114849,LOC101107338,TRIM14,EXOSC3,ALDH1B1,NCBP1,TBC1D2,LOC105607616,TLE4,LOC106990936,RORB,LOC101109680,FOXE1,CCDC107,TRNAC-GCA,LOC106990384,CORO2A,LOC101110212,LOC105607661,LOC101121827,ABHD17B,ZCCHC7,TMEM8…
2	57070601	57072100	47490104	65053443	Milk fat yield QTL (57736)	ERP44,TMEM2,LOC105607745,LOC101120137,NMRK1,LOC101111526,LOC106990932,TRMO,NANS,LOC101112203,SEC61B,COL15A1,LOC106990897,LOC101111773,TMOD1,LOC101123012,POLR1E,TPM2,LOC101106310,FAM166B,LOC101114849,LOC101107338,TRIM14,EXOSC3,ALDH1B1,NCBP1,TBC1D2,LOC105607616,TLE4,LOC106990936,RORB,LOC101109680,FOXE1,CCDC107,TRNAC-GCA,LOC106990384,CORO2A,LOC101110212,LOC105607661,LOC101121827,ABHD17B,ZCCHC7,TMEM8…
2	57359001	57360400	47490104	65053443	Milk fat yield QTL (57736)	ERP44,TMEM2,LOC105607745,LOC101120137,NMRK1,LOC101111526,LOC106990932,TRMO,NANS,LOC101112203,SEC61B,COL15A1,LOC106990897,LOC101111773,TMOD1,LOC101123012,POLR1E,TPM2,LOC101106310,FAM166B,LOC101114849,LOC101107338,TRIM14,EXOSC3,ALDH1B1,NCBP1,TBC1D2,LOC105607616,TLE4,LOC106990936,RORB,LOC101109680,FOXE1,CCDC107,TRNAC-GCA,LOC106990384,CORO2A,LOC101110212,LOC105607661,LOC101121827,ABHD17B,ZCCHC7,TMEM8…
2	57397401	57398700	47490104	65053443	Milk fat yield QTL (57736)	ERP44,TMEM2,LOC105607745,LOC101120137,NMRK1,LOC101111526,LOC106990932,TRMO,NANS,LOC101112203,SEC61B,COL15A1,LOC106990897,LOC101111773,TMOD1,LOC101123012,POLR1E,TPM2,LOC101106310,FAM166B,LOC101114849,LOC101107338,TRIM14,EXOSC3,ALDH1B1,NCBP1,TBC1D2,LOC105607616,TLE4,LOC106990936,RORB,LOC101109680,FOXE1,CCDC107,TRNAC-GCA,LOC106990384,CORO2A,LOC101110212,LOC105607661,LOC101121827,ABHD17B,ZCCHC7,TMEM8…
2	57461801	57462800	47490104	65053443	Milk fat yield QTL (57736)	ERP44,TMEM2,LOC105607745,LOC101120137,NMRK1,LOC101111526,LOC106990932,TRMO,NANS,LOC101112203,SEC61B,COL15A1,LOC106990897,LOC101111773,TMOD1,LOC101123012,POLR1E,TPM2,LOC101106310,FAM166B,LOC101114849,LOC101107338,TRIM14,EXOSC3,ALDH1B1,NCBP1,TBC1D2,LOC105607616,TLE4,LOC106990936,RORB,LOC101109680,FOXE1,CCDC107,TRNAC-GCA,LOC106990384,CORO2A,LOC101110212,LOC105607661,LOC101121827,ABHD17B,ZCCHC7,TMEM8…
2	57810901	57812200	47490104	65053443	Milk fat yield QTL (57736)	ERP44,TMEM2,LOC105607745,LOC101120137,NMRK1,LOC101111526,LOC106990932,TRMO,NANS,LOC101112203,SEC61B,COL15A1,LOC106990897,LOC101111773,TMOD1,LOC101123012,POLR1E,TPM2,LOC101106310,FAM166B,LOC101114849,LOC101107338,TRIM14,EXOSC3,ALDH1B1,NCBP1,TBC1D2,LOC105607616,TLE4,LOC106990936,RORB,LOC101109680,FOXE1,CCDC107,TRNAC-GCA,LOC106990384,CORO2A,LOC101110212,LOC105607661,LOC101121827,ABHD17B,ZCCHC7,TMEM8…
2	58083301	58084300	47490104	65053443	Milk fat yield QTL (57736)	ERP44,TMEM2,LOC105607745,LOC101120137,NMRK1,LOC101111526,LOC106990932,TRMO,NANS,LOC101112203,SEC61B,COL15A1,LOC106990897,LOC101111773,TMOD1,LOC101123012,POLR1E,TPM2,LOC101106310,FAM166B,LOC101114849,LOC101107338,TRIM14,EXOSC3,ALDH1B1,NCBP1,TBC1D2,LOC105607616,TLE4,LOC106990936,RORB,LOC101109680,FOXE1,CCDC107,TRNAC-GCA,LOC106990384,CORO2A,LOC101110212,LOC105607661,LOC101121827,ABHD17B,ZCCHC7,TMEM8…
2	58192201	58193600	47490104	65053443	Milk fat yield QTL (57736)	ERP44,TMEM2,LOC105607745,LOC101120137,NMRK1,LOC101111526,LOC106990932,TRMO,NANS,LOC101112203,SEC61B,COL15A1,LOC106990897,LOC101111773,TMOD1,LOC101123012,POLR1E,TPM2,LOC101106310,FAM166B,LOC101114849,LOC101107338,TRIM14,EXOSC3,ALDH1B1,NCBP1,TBC1D2,LOC105607616,TLE4,LOC106990936,RORB,LOC101109680,FOXE1,CCDC107,TRNAC-GCA,LOC106990384,CORO2A,LOC101110212,LOC105607661,LOC101121827,ABHD17B,ZCCHC7,TMEM8…
2	58331901	58333100	47490104	65053443	Milk fat yield QTL (57736)	ERP44,TMEM2,LOC105607745,LOC101120137,NMRK1,LOC101111526,LOC106990932,TRMO,NANS,LOC101112203,SEC61B,COL15A1,LOC106990897,LOC101111773,TMOD1,LOC101123012,POLR1E,TPM2,LOC101106310,FAM166B,LOC101114849,LOC101107338,TRIM14,EXOSC3,ALDH1B1,NCBP1,TBC1D2,LOC105607616,TLE4,LOC106990936,RORB,LOC101109680,FOXE1,CCDC107,TRNAC-GCA,LOC106990384,CORO2A,LOC101110212,LOC105607661,LOC101121827,ABHD17B,ZCCHC7,TMEM8…
2	59661001	59662000	47490104	65053443	Milk fat yield QTL (57736)	ERP44,TMEM2,LOC105607745,LOC101120137,NMRK1,LOC101111526,LOC106990932,TRMO,NANS,LOC101112203,SEC61B,COL15A1,LOC106990897,LOC101111773,TMOD1,LOC101123012,POLR1E,TPM2,LOC101106310,FAM166B,LOC101114849,LOC101107338,TRIM14,EXOSC3,ALDH1B1,NCBP1,TBC1D2,LOC105607616,TLE4,LOC106990936,RORB,LOC101109680,FOXE1,CCDC107,TRNAC-GCA,LOC106990384,CORO2A,LOC101110212,LOC105607661,LOC101121827,ABHD17B,ZCCHC7,TMEM8…
2	60265401	60266600	47490104	65053443	Milk fat yield QTL (57736)	ERP44,TMEM2,LOC105607745,LOC101120137,NMRK1,LOC101111526,LOC106990932,TRMO,NANS,LOC101112203,SEC61B,COL15A1,LOC106990897,LOC101111773,TMOD1,LOC101123012,POLR1E,TPM2,LOC101106310,FAM166B,LOC101114849,LOC101107338,TRIM14,EXOSC3,ALDH1B1,NCBP1,TBC1D2,LOC105607616,TLE4,LOC106990936,RORB,LOC101109680,FOXE1,CCDC107,TRNAC-GCA,LOC106990384,CORO2A,LOC101110212,LOC105607661,LOC101121827,ABHD17B,ZCCHC7,TMEM8…
2	60518101	60519100	47490104	65053443	Milk fat yield QTL (57736)	ERP44,TMEM2,LOC105607745,LOC101120137,NMRK1,LOC101111526,LOC106990932,TRMO,NANS,LOC101112203,SEC61B,COL15A1,LOC106990897,LOC101111773,TMOD1,LOC101123012,POLR1E,TPM2,LOC101106310,FAM166B,LOC101114849,LOC101107338,TRIM14,EXOSC3,ALDH1B1,NCBP1,TBC1D2,LOC105607616,TLE4,LOC106990936,RORB,LOC101109680,FOXE1,CCDC107,TRNAC-GCA,LOC106990384,CORO2A,LOC101110212,LOC105607661,LOC101121827,ABHD17B,ZCCHC7,TMEM8…
2	61171301	61175500	47490104	65053443	Milk fat yield QTL (57736)	ERP44,TMEM2,LOC105607745,LOC101120137,NMRK1,LOC101111526,LOC106990932,TRMO,NANS,LOC101112203,SEC61B,COL15A1,LOC106990897,LOC101111773,TMOD1,LOC101123012,POLR1E,TPM2,LOC101106310,FAM166B,LOC101114849,LOC101107338,TRIM14,EXOSC3,ALDH1B1,NCBP1,TBC1D2,LOC105607616,TLE4,LOC106990936,RORB,LOC101109680,FOXE1,CCDC107,TRNAC-GCA,LOC106990384,CORO2A,LOC101110212,LOC105607661,LOC101121827,ABHD17B,ZCCHC7,TMEM8…
2	61296501	61303300	47490104	65053443	Milk fat yield QTL (57736)	ERP44,TMEM2,LOC105607745,LOC101120137,NMRK1,LOC101111526,LOC106990932,TRMO,NANS,LOC101112203,SEC61B,COL15A1,LOC106990897,LOC101111773,TMOD1,LOC101123012,POLR1E,TPM2,LOC101106310,FAM166B,LOC101114849,LOC101107338,TRIM14,EXOSC3,ALDH1B1,NCBP1,TBC1D2,LOC105607616,TLE4,LOC106990936,RORB,LOC101109680,FOXE1,CCDC107,TRNAC-GCA,LOC106990384,CORO2A,LOC101110212,LOC105607661,LOC101121827,ABHD17B,ZCCHC7,TMEM8…
2	61350901	61351900	47490104	65053443	Milk fat yield QTL (57736)	ERP44,TMEM2,LOC105607745,LOC101120137,NMRK1,LOC101111526,LOC106990932,TRMO,NANS,LOC101112203,SEC61B,COL15A1,LOC106990897,LOC101111773,TMOD1,LOC101123012,POLR1E,TPM2,LOC101106310,FAM166B,LOC101114849,LOC101107338,TRIM14,EXOSC3,ALDH1B1,NCBP1,TBC1D2,LOC105607616,TLE4,LOC106990936,RORB,LOC101109680,FOXE1,CCDC107,TRNAC-GCA,LOC106990384,CORO2A,LOC101110212,LOC105607661,LOC101121827,ABHD17B,ZCCHC7,TMEM8…
2	61389401	61390500	47490104	65053443	Milk fat yield QTL (57736)	ERP44,TMEM2,LOC105607745,LOC101120137,NMRK1,LOC101111526,LOC106990932,TRMO,NANS,LOC101112203,SEC61B,COL15A1,LOC106990897,LOC101111773,TMOD1,LOC101123012,POLR1E,TPM2,LOC101106310,FAM166B,LOC101114849,LOC101107338,TRIM14,EXOSC3,ALDH1B1,NCBP1,TBC1D2,LOC105607616,TLE4,LOC106990936,RORB,LOC101109680,FOXE1,CCDC107,TRNAC-GCA,LOC106990384,CORO2A,LOC101110212,LOC105607661,LOC101121827,ABHD17B,ZCCHC7,TMEM8…
2	62222501	62223900	47490104	65053443	Milk fat yield QTL (57736)	ERP44,TMEM2,LOC105607745,LOC101120137,NMRK1,LOC101111526,LOC106990932,TRMO,NANS,LOC101112203,SEC61B,COL15A1,LOC106990897,LOC101111773,TMOD1,LOC101123012,POLR1E,TPM2,LOC101106310,FAM166B,LOC101114849,LOC101107338,TRIM14,EXOSC3,ALDH1B1,NCBP1,TBC1D2,LOC105607616,TLE4,LOC106990936,RORB,LOC101109680,FOXE1,CCDC107,TRNAC-GCA,LOC106990384,CORO2A,LOC101110212,LOC105607661,LOC101121827,ABHD17B,ZCCHC7,TMEM8…
2	62723201	62725000	47490104	65053443	Milk fat yield QTL (57736)	ERP44,TMEM2,LOC105607745,LOC101120137,NMRK1,LOC101111526,LOC106990932,TRMO,NANS,LOC101112203,SEC61B,COL15A1,LOC106990897,LOC101111773,TMOD1,LOC101123012,POLR1E,TPM2,LOC101106310,FAM166B,LOC101114849,LOC101107338,TRIM14,EXOSC3,ALDH1B1,NCBP1,TBC1D2,LOC105607616,TLE4,LOC106990936,RORB,LOC101109680,FOXE1,CCDC107,TRNAC-GCA,LOC106990384,CORO2A,LOC101110212,LOC105607661,LOC101121827,ABHD17B,ZCCHC7,TMEM8…
2	62898701	62900100	47490104	65053443	Milk fat yield QTL (57736)	ERP44,TMEM2,LOC105607745,LOC101120137,NMRK1,LOC101111526,LOC106990932,TRMO,NANS,LOC101112203,SEC61B,COL15A1,LOC106990897,LOC101111773,TMOD1,LOC101123012,POLR1E,TPM2,LOC101106310,FAM166B,LOC101114849,LOC101107338,TRIM14,EXOSC3,ALDH1B1,NCBP1,TBC1D2,LOC105607616,TLE4,LOC106990936,RORB,LOC101109680,FOXE1,CCDC107,TRNAC-GCA,LOC106990384,CORO2A,LOC101110212,LOC105607661,LOC101121827,ABHD17B,ZCCHC7,TMEM8…
2	63078801	63079800	47490104	65053443	Milk fat yield QTL (57736)	ERP44,TMEM2,LOC105607745,LOC101120137,NMRK1,LOC101111526,LOC106990932,TRMO,NANS,LOC101112203,SEC61B,COL15A1,LOC106990897,LOC101111773,TMOD1,LOC101123012,POLR1E,TPM2,LOC101106310,FAM166B,LOC101114849,LOC101107338,TRIM14,EXOSC3,ALDH1B1,NCBP1,TBC1D2,LOC105607616,TLE4,LOC106990936,RORB,LOC101109680,FOXE1,CCDC107,TRNAC-GCA,LOC106990384,CORO2A,LOC101110212,LOC105607661,LOC101121827,ABHD17B,ZCCHC7,TMEM8…
2	63218701	63219700	47490104	65053443	Milk fat yield QTL (57736)	ERP44,TMEM2,LOC105607745,LOC101120137,NMRK1,LOC101111526,LOC106990932,TRMO,NANS,LOC101112203,SEC61B,COL15A1,LOC106990897,LOC101111773,TMOD1,LOC101123012,POLR1E,TPM2,LOC101106310,FAM166B,LOC101114849,LOC101107338,TRIM14,EXOSC3,ALDH1B1,NCBP1,TBC1D2,LOC105607616,TLE4,LOC106990936,RORB,LOC101109680,FOXE1,CCDC107,TRNAC-GCA,LOC106990384,CORO2A,LOC101110212,LOC105607661,LOC101121827,ABHD17B,ZCCHC7,TMEM8…
2	63313901	63314900	47490104	65053443	Milk fat yield QTL (57736)	ERP44,TMEM2,LOC105607745,LOC101120137,NMRK1,LOC101111526,LOC106990932,TRMO,NANS,LOC101112203,SEC61B,COL15A1,LOC106990897,LOC101111773,TMOD1,LOC101123012,POLR1E,TPM2,LOC101106310,FAM166B,LOC101114849,LOC101107338,TRIM14,EXOSC3,ALDH1B1,NCBP1,TBC1D2,LOC105607616,TLE4,LOC106990936,RORB,LOC101109680,FOXE1,CCDC107,TRNAC-GCA,LOC106990384,CORO2A,LOC101110212,LOC105607661,LOC101121827,ABHD17B,ZCCHC7,TMEM8…
2	63328101	63329100	47490104	65053443	Milk fat yield QTL (57736)	ERP44,TMEM2,LOC105607745,LOC101120137,NMRK1,LOC101111526,LOC106990932,TRMO,NANS,LOC101112203,SEC61B,COL15A1,LOC106990897,LOC101111773,TMOD1,LOC101123012,POLR1E,TPM2,LOC101106310,FAM166B,LOC101114849,LOC101107338,TRIM14,EXOSC3,ALDH1B1,NCBP1,TBC1D2,LOC105607616,TLE4,LOC106990936,RORB,LOC101109680,FOXE1,CCDC107,TRNAC-GCA,LOC106990384,CORO2A,LOC101110212,LOC105607661,LOC101121827,ABHD17B,ZCCHC7,TMEM8…
2	63911501	63913100	47490104	65053443	Milk fat yield QTL (57736)	ERP44,TMEM2,LOC105607745,LOC101120137,NMRK1,LOC101111526,LOC106990932,TRMO,NANS,LOC101112203,SEC61B,COL15A1,LOC106990897,LOC101111773,TMOD1,LOC101123012,POLR1E,TPM2,LOC101106310,FAM166B,LOC101114849,LOC101107338,TRIM14,EXOSC3,ALDH1B1,NCBP1,TBC1D2,LOC105607616,TLE4,LOC106990936,RORB,LOC101109680,FOXE1,CCDC107,TRNAC-GCA,LOC106990384,CORO2A,LOC101110212,LOC105607661,LOC101121827,ABHD17B,ZCCHC7,TMEM8…
2	64120201	64121500	47490104	65053443	Milk fat yield QTL (57736)	ERP44,TMEM2,LOC105607745,LOC101120137,NMRK1,LOC101111526,LOC106990932,TRMO,NANS,LOC101112203,SEC61B,COL15A1,LOC106990897,LOC101111773,TMOD1,LOC101123012,POLR1E,TPM2,LOC101106310,FAM166B,LOC101114849,LOC101107338,TRIM14,EXOSC3,ALDH1B1,NCBP1,TBC1D2,LOC105607616,TLE4,LOC106990936,RORB,LOC101109680,FOXE1,CCDC107,TRNAC-GCA,LOC106990384,CORO2A,LOC101110212,LOC105607661,LOC101121827,ABHD17B,ZCCHC7,TMEM8…
2	64550101	64551300	47490104	65053443	Milk fat yield QTL (57736)	ERP44,TMEM2,LOC105607745,LOC101120137,NMRK1,LOC101111526,LOC106990932,TRMO,NANS,LOC101112203,SEC61B,COL15A1,LOC106990897,LOC101111773,TMOD1,LOC101123012,POLR1E,TPM2,LOC101106310,FAM166B,LOC101114849,LOC101107338,TRIM14,EXOSC3,ALDH1B1,NCBP1,TBC1D2,LOC105607616,TLE4,LOC106990936,RORB,LOC101109680,FOXE1,CCDC107,TRNAC-GCA,LOC106990384,CORO2A,LOC101110212,LOC105607661,LOC101121827,ABHD17B,ZCCHC7,TMEM8…
2	64750001	64751500	47490104	65053443	Milk fat yield QTL (57736)	ERP44,TMEM2,LOC105607745,LOC101120137,NMRK1,LOC101111526,LOC106990932,TRMO,NANS,LOC101112203,SEC61B,COL15A1,LOC106990897,LOC101111773,TMOD1,LOC101123012,POLR1E,TPM2,LOC101106310,FAM166B,LOC101114849,LOC101107338,TRIM14,EXOSC3,ALDH1B1,NCBP1,TBC1D2,LOC105607616,TLE4,LOC106990936,RORB,LOC101109680,FOXE1,CCDC107,TRNAC-GCA,LOC106990384,CORO2A,LOC101110212,LOC105607661,LOC101121827,ABHD17B,ZCCHC7,TMEM8…
2	65513501	65516900	32052994	207432142	Milk protein percentage QTL (57738)	GORASP2,RASEF,LOC106990930,WDR33,NPM2,XPO7,PIP5K1B,LOC101112634,NMRK1,RAB3GAP1,CCAR2,LOC106990932,KIAA2012,LOC105611679,RHOBTB2,LOC101121497,CEP44,LOC105609145,LOC106990539,LOC105609818,LOC101109865,POLR2D,LOC101102375,LOC101111773,LOC105611746,CWC22,GNRH1,HNRNPK,LOC101123012,MSTN,LOC101115858,LOC101106395,LOC105607885,RIC1,PEBP4,HOXD1,POLR1E,CASP8,CCDC25,GLRA3,DLX2,RIF1,BAG1,LOC101114849,HR,LOC1…
2	66435101	66436100	32052994	207432142	Milk protein percentage QTL (57738)	GORASP2,RASEF,LOC106990930,WDR33,NPM2,XPO7,PIP5K1B,LOC101112634,NMRK1,RAB3GAP1,CCAR2,LOC106990932,KIAA2012,LOC105611679,RHOBTB2,LOC101121497,CEP44,LOC105609145,LOC106990539,LOC105609818,LOC101109865,POLR2D,LOC101102375,LOC101111773,LOC105611746,CWC22,GNRH1,HNRNPK,LOC101123012,MSTN,LOC101115858,LOC101106395,LOC105607885,RIC1,PEBP4,HOXD1,POLR1E,CASP8,CCDC25,GLRA3,DLX2,RIF1,BAG1,LOC101114849,HR,LOC1…
2	67232901	67234100	32052994	207432142	Milk protein percentage QTL (57738)	GORASP2,RASEF,LOC106990930,WDR33,NPM2,XPO7,PIP5K1B,LOC101112634,NMRK1,RAB3GAP1,CCAR2,LOC106990932,KIAA2012,LOC105611679,RHOBTB2,LOC101121497,CEP44,LOC105609145,LOC106990539,LOC105609818,LOC101109865,POLR2D,LOC101102375,LOC101111773,LOC105611746,CWC22,GNRH1,HNRNPK,LOC101123012,MSTN,LOC101115858,LOC101106395,LOC105607885,RIC1,PEBP4,HOXD1,POLR1E,CASP8,CCDC25,GLRA3,DLX2,RIF1,BAG1,LOC101114849,HR,LOC1…
2	67253401	67254500	32052994	207432142	Milk protein percentage QTL (57738)	GORASP2,RASEF,LOC106990930,WDR33,NPM2,XPO7,PIP5K1B,LOC101112634,NMRK1,RAB3GAP1,CCAR2,LOC106990932,KIAA2012,LOC105611679,RHOBTB2,LOC101121497,CEP44,LOC105609145,LOC106990539,LOC105609818,LOC101109865,POLR2D,LOC101102375,LOC101111773,LOC105611746,CWC22,GNRH1,HNRNPK,LOC101123012,MSTN,LOC101115858,LOC101106395,LOC105607885,RIC1,PEBP4,HOXD1,POLR1E,CASP8,CCDC25,GLRA3,DLX2,RIF1,BAG1,LOC101114849,HR,LOC1…
2	67872101	67873500	32052994	207432142	Milk protein percentage QTL (57738)	GORASP2,RASEF,LOC106990930,WDR33,NPM2,XPO7,PIP5K1B,LOC101112634,NMRK1,RAB3GAP1,CCAR2,LOC106990932,KIAA2012,LOC105611679,RHOBTB2,LOC101121497,CEP44,LOC105609145,LOC106990539,LOC105609818,LOC101109865,POLR2D,LOC101102375,LOC101111773,LOC105611746,CWC22,GNRH1,HNRNPK,LOC101123012,MSTN,LOC101115858,LOC101106395,LOC105607885,RIC1,PEBP4,HOXD1,POLR1E,CASP8,CCDC25,GLRA3,DLX2,RIF1,BAG1,LOC101114849,HR,LOC1…
2	69254701	69255700	32052994	207432142	Milk protein percentage QTL (57738)	GORASP2,RASEF,LOC106990930,WDR33,NPM2,XPO7,PIP5K1B,LOC101112634,NMRK1,RAB3GAP1,CCAR2,LOC106990932,KIAA2012,LOC105611679,RHOBTB2,LOC101121497,CEP44,LOC105609145,LOC106990539,LOC105609818,LOC101109865,POLR2D,LOC101102375,LOC101111773,LOC105611746,CWC22,GNRH1,HNRNPK,LOC101123012,MSTN,LOC101115858,LOC101106395,LOC105607885,RIC1,PEBP4,HOXD1,POLR1E,CASP8,CCDC25,GLRA3,DLX2,RIF1,BAG1,LOC101114849,HR,LOC1…
2	70335601	70337000	32052994	207432142	Milk protein percentage QTL (57738)	GORASP2,RASEF,LOC106990930,WDR33,NPM2,XPO7,PIP5K1B,LOC101112634,NMRK1,RAB3GAP1,CCAR2,LOC106990932,KIAA2012,LOC105611679,RHOBTB2,LOC101121497,CEP44,LOC105609145,LOC106990539,LOC105609818,LOC101109865,POLR2D,LOC101102375,LOC101111773,LOC105611746,CWC22,GNRH1,HNRNPK,LOC101123012,MSTN,LOC101115858,LOC101106395,LOC105607885,RIC1,PEBP4,HOXD1,POLR1E,CASP8,CCDC25,GLRA3,DLX2,RIF1,BAG1,LOC101114849,HR,LOC1…
2	70374201	70375300	32052994	207432142	Milk protein percentage QTL (57738)	GORASP2,RASEF,LOC106990930,WDR33,NPM2,XPO7,PIP5K1B,LOC101112634,NMRK1,RAB3GAP1,CCAR2,LOC106990932,KIAA2012,LOC105611679,RHOBTB2,LOC101121497,CEP44,LOC105609145,LOC106990539,LOC105609818,LOC101109865,POLR2D,LOC101102375,LOC101111773,LOC105611746,CWC22,GNRH1,HNRNPK,LOC101123012,MSTN,LOC101115858,LOC101106395,LOC105607885,RIC1,PEBP4,HOXD1,POLR1E,CASP8,CCDC25,GLRA3,DLX2,RIF1,BAG1,LOC101114849,HR,LOC1…
2	70428301	70435100	32052994	207432142	Milk protein percentage QTL (57738)	GORASP2,RASEF,LOC106990930,WDR33,NPM2,XPO7,PIP5K1B,LOC101112634,NMRK1,RAB3GAP1,CCAR2,LOC106990932,KIAA2012,LOC105611679,RHOBTB2,LOC101121497,CEP44,LOC105609145,LOC106990539,LOC105609818,LOC101109865,POLR2D,LOC101102375,LOC101111773,LOC105611746,CWC22,GNRH1,HNRNPK,LOC101123012,MSTN,LOC101115858,LOC101106395,LOC105607885,RIC1,PEBP4,HOXD1,POLR1E,CASP8,CCDC25,GLRA3,DLX2,RIF1,BAG1,LOC101114849,HR,LOC1…
2	71513901	71516900	32052994	207432142	Milk protein percentage QTL (57738)	GORASP2,RASEF,LOC106990930,WDR33,NPM2,XPO7,PIP5K1B,LOC101112634,NMRK1,RAB3GAP1,CCAR2,LOC106990932,KIAA2012,LOC105611679,RHOBTB2,LOC101121497,CEP44,LOC105609145,LOC106990539,LOC105609818,LOC101109865,POLR2D,LOC101102375,LOC101111773,LOC105611746,CWC22,GNRH1,HNRNPK,LOC101123012,MSTN,LOC101115858,LOC101106395,LOC105607885,RIC1,PEBP4,HOXD1,POLR1E,CASP8,CCDC25,GLRA3,DLX2,RIF1,BAG1,LOC101114849,HR,LOC1…
2	73860001	73861500	32052994	207432142	Milk protein percentage QTL (57738)	GORASP2,RASEF,LOC106990930,WDR33,NPM2,XPO7,PIP5K1B,LOC101112634,NMRK1,RAB3GAP1,CCAR2,LOC106990932,KIAA2012,LOC105611679,RHOBTB2,LOC101121497,CEP44,LOC105609145,LOC106990539,LOC105609818,LOC101109865,POLR2D,LOC101102375,LOC101111773,LOC105611746,CWC22,GNRH1,HNRNPK,LOC101123012,MSTN,LOC101115858,LOC101106395,LOC105607885,RIC1,PEBP4,HOXD1,POLR1E,CASP8,CCDC25,GLRA3,DLX2,RIF1,BAG1,LOC101114849,HR,LOC1…
2	74616001	74617000	32052994	207432142	Milk protein percentage QTL (57738)	GORASP2,RASEF,LOC106990930,WDR33,NPM2,XPO7,PIP5K1B,LOC101112634,NMRK1,RAB3GAP1,CCAR2,LOC106990932,KIAA2012,LOC105611679,RHOBTB2,LOC101121497,CEP44,LOC105609145,LOC106990539,LOC105609818,LOC101109865,POLR2D,LOC101102375,LOC101111773,LOC105611746,CWC22,GNRH1,HNRNPK,LOC101123012,MSTN,LOC101115858,LOC101106395,LOC105607885,RIC1,PEBP4,HOXD1,POLR1E,CASP8,CCDC25,GLRA3,DLX2,RIF1,BAG1,LOC101114849,HR,LOC1…
2	75130301	75131300	32052994	207432142	Milk protein percentage QTL (57738)	GORASP2,RASEF,LOC106990930,WDR33,NPM2,XPO7,PIP5K1B,LOC101112634,NMRK1,RAB3GAP1,CCAR2,LOC106990932,KIAA2012,LOC105611679,RHOBTB2,LOC101121497,CEP44,LOC105609145,LOC106990539,LOC105609818,LOC101109865,POLR2D,LOC101102375,LOC101111773,LOC105611746,CWC22,GNRH1,HNRNPK,LOC101123012,MSTN,LOC101115858,LOC101106395,LOC105607885,RIC1,PEBP4,HOXD1,POLR1E,CASP8,CCDC25,GLRA3,DLX2,RIF1,BAG1,LOC101114849,HR,LOC1…
2	75337701	75338700	32052994	207432142	Milk protein percentage QTL (57738)	GORASP2,RASEF,LOC106990930,WDR33,NPM2,XPO7,PIP5K1B,LOC101112634,NMRK1,RAB3GAP1,CCAR2,LOC106990932,KIAA2012,LOC105611679,RHOBTB2,LOC101121497,CEP44,LOC105609145,LOC106990539,LOC105609818,LOC101109865,POLR2D,LOC101102375,LOC101111773,LOC105611746,CWC22,GNRH1,HNRNPK,LOC101123012,MSTN,LOC101115858,LOC101106395,LOC105607885,RIC1,PEBP4,HOXD1,POLR1E,CASP8,CCDC25,GLRA3,DLX2,RIF1,BAG1,LOC101114849,HR,LOC1…
2	76445001	76446200	32052994	207432142	Milk protein percentage QTL (57738)	GORASP2,RASEF,LOC106990930,WDR33,NPM2,XPO7,PIP5K1B,LOC101112634,NMRK1,RAB3GAP1,CCAR2,LOC106990932,KIAA2012,LOC105611679,RHOBTB2,LOC101121497,CEP44,LOC105609145,LOC106990539,LOC105609818,LOC101109865,POLR2D,LOC101102375,LOC101111773,LOC105611746,CWC22,GNRH1,HNRNPK,LOC101123012,MSTN,LOC101115858,LOC101106395,LOC105607885,RIC1,PEBP4,HOXD1,POLR1E,CASP8,CCDC25,GLRA3,DLX2,RIF1,BAG1,LOC101114849,HR,LOC1…
2	76799101	76801200	32052994	207432142	Milk protein percentage QTL (57738)	GORASP2,RASEF,LOC106990930,WDR33,NPM2,XPO7,PIP5K1B,LOC101112634,NMRK1,RAB3GAP1,CCAR2,LOC106990932,KIAA2012,LOC105611679,RHOBTB2,LOC101121497,CEP44,LOC105609145,LOC106990539,LOC105609818,LOC101109865,POLR2D,LOC101102375,LOC101111773,LOC105611746,CWC22,GNRH1,HNRNPK,LOC101123012,MSTN,LOC101115858,LOC101106395,LOC105607885,RIC1,PEBP4,HOXD1,POLR1E,CASP8,CCDC25,GLRA3,DLX2,RIF1,BAG1,LOC101114849,HR,LOC1…
2	76806001	76808300	32052994	207432142	Milk protein percentage QTL (57738)	GORASP2,RASEF,LOC106990930,WDR33,NPM2,XPO7,PIP5K1B,LOC101112634,NMRK1,RAB3GAP1,CCAR2,LOC106990932,KIAA2012,LOC105611679,RHOBTB2,LOC101121497,CEP44,LOC105609145,LOC106990539,LOC105609818,LOC101109865,POLR2D,LOC101102375,LOC101111773,LOC105611746,CWC22,GNRH1,HNRNPK,LOC101123012,MSTN,LOC101115858,LOC101106395,LOC105607885,RIC1,PEBP4,HOXD1,POLR1E,CASP8,CCDC25,GLRA3,DLX2,RIF1,BAG1,LOC101114849,HR,LOC1…
2	76889401	76891900	32052994	207432142	Milk protein percentage QTL (57738)	GORASP2,RASEF,LOC106990930,WDR33,NPM2,XPO7,PIP5K1B,LOC101112634,NMRK1,RAB3GAP1,CCAR2,LOC106990932,KIAA2012,LOC105611679,RHOBTB2,LOC101121497,CEP44,LOC105609145,LOC106990539,LOC105609818,LOC101109865,POLR2D,LOC101102375,LOC101111773,LOC105611746,CWC22,GNRH1,HNRNPK,LOC101123012,MSTN,LOC101115858,LOC101106395,LOC105607885,RIC1,PEBP4,HOXD1,POLR1E,CASP8,CCDC25,GLRA3,DLX2,RIF1,BAG1,LOC101114849,HR,LOC1…
2	77203401	77204600	32052994	207432142	Milk protein percentage QTL (57738)	GORASP2,RASEF,LOC106990930,WDR33,NPM2,XPO7,PIP5K1B,LOC101112634,NMRK1,RAB3GAP1,CCAR2,LOC106990932,KIAA2012,LOC105611679,RHOBTB2,LOC101121497,CEP44,LOC105609145,LOC106990539,LOC105609818,LOC101109865,POLR2D,LOC101102375,LOC101111773,LOC105611746,CWC22,GNRH1,HNRNPK,LOC101123012,MSTN,LOC101115858,LOC101106395,LOC105607885,RIC1,PEBP4,HOXD1,POLR1E,CASP8,CCDC25,GLRA3,DLX2,RIF1,BAG1,LOC101114849,HR,LOC1…
2	79035901	79037100	32052994	207432142	Milk protein percentage QTL (57738)	GORASP2,RASEF,LOC106990930,WDR33,NPM2,XPO7,PIP5K1B,LOC101112634,NMRK1,RAB3GAP1,CCAR2,LOC106990932,KIAA2012,LOC105611679,RHOBTB2,LOC101121497,CEP44,LOC105609145,LOC106990539,LOC105609818,LOC101109865,POLR2D,LOC101102375,LOC101111773,LOC105611746,CWC22,GNRH1,HNRNPK,LOC101123012,MSTN,LOC101115858,LOC101106395,LOC105607885,RIC1,PEBP4,HOXD1,POLR1E,CASP8,CCDC25,GLRA3,DLX2,RIF1,BAG1,LOC101114849,HR,LOC1…
2	79257401	79258400	32052994	207432142	Milk protein percentage QTL (57738)	GORASP2,RASEF,LOC106990930,WDR33,NPM2,XPO7,PIP5K1B,LOC101112634,NMRK1,RAB3GAP1,CCAR2,LOC106990932,KIAA2012,LOC105611679,RHOBTB2,LOC101121497,CEP44,LOC105609145,LOC106990539,LOC105609818,LOC101109865,POLR2D,LOC101102375,LOC101111773,LOC105611746,CWC22,GNRH1,HNRNPK,LOC101123012,MSTN,LOC101115858,LOC101106395,LOC105607885,RIC1,PEBP4,HOXD1,POLR1E,CASP8,CCDC25,GLRA3,DLX2,RIF1,BAG1,LOC101114849,HR,LOC1…
2	79727201	79728500	32052994	207432142	Milk protein percentage QTL (57738)	GORASP2,RASEF,LOC106990930,WDR33,NPM2,XPO7,PIP5K1B,LOC101112634,NMRK1,RAB3GAP1,CCAR2,LOC106990932,KIAA2012,LOC105611679,RHOBTB2,LOC101121497,CEP44,LOC105609145,LOC106990539,LOC105609818,LOC101109865,POLR2D,LOC101102375,LOC101111773,LOC105611746,CWC22,GNRH1,HNRNPK,LOC101123012,MSTN,LOC101115858,LOC101106395,LOC105607885,RIC1,PEBP4,HOXD1,POLR1E,CASP8,CCDC25,GLRA3,DLX2,RIF1,BAG1,LOC101114849,HR,LOC1…
2	79890401	79893700	32052994	207432142	Milk protein percentage QTL (57738)	GORASP2,RASEF,LOC106990930,WDR33,NPM2,XPO7,PIP5K1B,LOC101112634,NMRK1,RAB3GAP1,CCAR2,LOC106990932,KIAA2012,LOC105611679,RHOBTB2,LOC101121497,CEP44,LOC105609145,LOC106990539,LOC105609818,LOC101109865,POLR2D,LOC101102375,LOC101111773,LOC105611746,CWC22,GNRH1,HNRNPK,LOC101123012,MSTN,LOC101115858,LOC101106395,LOC105607885,RIC1,PEBP4,HOXD1,POLR1E,CASP8,CCDC25,GLRA3,DLX2,RIF1,BAG1,LOC101114849,HR,LOC1…
2	80054401	80055600	32052994	207432142	Milk protein percentage QTL (57738)	GORASP2,RASEF,LOC106990930,WDR33,NPM2,XPO7,PIP5K1B,LOC101112634,NMRK1,RAB3GAP1,CCAR2,LOC106990932,KIAA2012,LOC105611679,RHOBTB2,LOC101121497,CEP44,LOC105609145,LOC106990539,LOC105609818,LOC101109865,POLR2D,LOC101102375,LOC101111773,LOC105611746,CWC22,GNRH1,HNRNPK,LOC101123012,MSTN,LOC101115858,LOC101106395,LOC105607885,RIC1,PEBP4,HOXD1,POLR1E,CASP8,CCDC25,GLRA3,DLX2,RIF1,BAG1,LOC101114849,HR,LOC1…
2	80108201	80109200	32052994	207432142	Milk protein percentage QTL (57738)	GORASP2,RASEF,LOC106990930,WDR33,NPM2,XPO7,PIP5K1B,LOC101112634,NMRK1,RAB3GAP1,CCAR2,LOC106990932,KIAA2012,LOC105611679,RHOBTB2,LOC101121497,CEP44,LOC105609145,LOC106990539,LOC105609818,LOC101109865,POLR2D,LOC101102375,LOC101111773,LOC105611746,CWC22,GNRH1,HNRNPK,LOC101123012,MSTN,LOC101115858,LOC101106395,LOC105607885,RIC1,PEBP4,HOXD1,POLR1E,CASP8,CCDC25,GLRA3,DLX2,RIF1,BAG1,LOC101114849,HR,LOC1…
2	80594201	80595700	32052994	207432142	Milk protein percentage QTL (57738)	GORASP2,RASEF,LOC106990930,WDR33,NPM2,XPO7,PIP5K1B,LOC101112634,NMRK1,RAB3GAP1,CCAR2,LOC106990932,KIAA2012,LOC105611679,RHOBTB2,LOC101121497,CEP44,LOC105609145,LOC106990539,LOC105609818,LOC101109865,POLR2D,LOC101102375,LOC101111773,LOC105611746,CWC22,GNRH1,HNRNPK,LOC101123012,MSTN,LOC101115858,LOC101106395,LOC105607885,RIC1,PEBP4,HOXD1,POLR1E,CASP8,CCDC25,GLRA3,DLX2,RIF1,BAG1,LOC101114849,HR,LOC1…
2	80767401	80769200	32052994	207432142	Milk protein percentage QTL (57738)	GORASP2,RASEF,LOC106990930,WDR33,NPM2,XPO7,PIP5K1B,LOC101112634,NMRK1,RAB3GAP1,CCAR2,LOC106990932,KIAA2012,LOC105611679,RHOBTB2,LOC101121497,CEP44,LOC105609145,LOC106990539,LOC105609818,LOC101109865,POLR2D,LOC101102375,LOC101111773,LOC105611746,CWC22,GNRH1,HNRNPK,LOC101123012,MSTN,LOC101115858,LOC101106395,LOC105607885,RIC1,PEBP4,HOXD1,POLR1E,CASP8,CCDC25,GLRA3,DLX2,RIF1,BAG1,LOC101114849,HR,LOC1…
2	81001201	81003500	32052994	207432142	Milk protein percentage QTL (57738)	GORASP2,RASEF,LOC106990930,WDR33,NPM2,XPO7,PIP5K1B,LOC101112634,NMRK1,RAB3GAP1,CCAR2,LOC106990932,KIAA2012,LOC105611679,RHOBTB2,LOC101121497,CEP44,LOC105609145,LOC106990539,LOC105609818,LOC101109865,POLR2D,LOC101102375,LOC101111773,LOC105611746,CWC22,GNRH1,HNRNPK,LOC101123012,MSTN,LOC101115858,LOC101106395,LOC105607885,RIC1,PEBP4,HOXD1,POLR1E,CASP8,CCDC25,GLRA3,DLX2,RIF1,BAG1,LOC101114849,HR,LOC1…
2	81093201	81095800	32052994	207432142	Milk protein percentage QTL (57738)	GORASP2,RASEF,LOC106990930,WDR33,NPM2,XPO7,PIP5K1B,LOC101112634,NMRK1,RAB3GAP1,CCAR2,LOC106990932,KIAA2012,LOC105611679,RHOBTB2,LOC101121497,CEP44,LOC105609145,LOC106990539,LOC105609818,LOC101109865,POLR2D,LOC101102375,LOC101111773,LOC105611746,CWC22,GNRH1,HNRNPK,LOC101123012,MSTN,LOC101115858,LOC101106395,LOC105607885,RIC1,PEBP4,HOXD1,POLR1E,CASP8,CCDC25,GLRA3,DLX2,RIF1,BAG1,LOC101114849,HR,LOC1…
2	81756901	81758000	32052994	207432142	Milk protein percentage QTL (57738)	GORASP2,RASEF,LOC106990930,WDR33,NPM2,XPO7,PIP5K1B,LOC101112634,NMRK1,RAB3GAP1,CCAR2,LOC106990932,KIAA2012,LOC105611679,RHOBTB2,LOC101121497,CEP44,LOC105609145,LOC106990539,LOC105609818,LOC101109865,POLR2D,LOC101102375,LOC101111773,LOC105611746,CWC22,GNRH1,HNRNPK,LOC101123012,MSTN,LOC101115858,LOC101106395,LOC105607885,RIC1,PEBP4,HOXD1,POLR1E,CASP8,CCDC25,GLRA3,DLX2,RIF1,BAG1,LOC101114849,HR,LOC1…
2	82027901	82030300	32052994	207432142	Milk protein percentage QTL (57738)	GORASP2,RASEF,LOC106990930,WDR33,NPM2,XPO7,PIP5K1B,LOC101112634,NMRK1,RAB3GAP1,CCAR2,LOC106990932,KIAA2012,LOC105611679,RHOBTB2,LOC101121497,CEP44,LOC105609145,LOC106990539,LOC105609818,LOC101109865,POLR2D,LOC101102375,LOC101111773,LOC105611746,CWC22,GNRH1,HNRNPK,LOC101123012,MSTN,LOC101115858,LOC101106395,LOC105607885,RIC1,PEBP4,HOXD1,POLR1E,CASP8,CCDC25,GLRA3,DLX2,RIF1,BAG1,LOC101114849,HR,LOC1…
2	82265201	82266400	32052994	207432142	Milk protein percentage QTL (57738)	GORASP2,RASEF,LOC106990930,WDR33,NPM2,XPO7,PIP5K1B,LOC101112634,NMRK1,RAB3GAP1,CCAR2,LOC106990932,KIAA2012,LOC105611679,RHOBTB2,LOC101121497,CEP44,LOC105609145,LOC106990539,LOC105609818,LOC101109865,POLR2D,LOC101102375,LOC101111773,LOC105611746,CWC22,GNRH1,HNRNPK,LOC101123012,MSTN,LOC101115858,LOC101106395,LOC105607885,RIC1,PEBP4,HOXD1,POLR1E,CASP8,CCDC25,GLRA3,DLX2,RIF1,BAG1,LOC101114849,HR,LOC1…
2	82534601	82535900	32052994	207432142	Milk protein percentage QTL (57738)	GORASP2,RASEF,LOC106990930,WDR33,NPM2,XPO7,PIP5K1B,LOC101112634,NMRK1,RAB3GAP1,CCAR2,LOC106990932,KIAA2012,LOC105611679,RHOBTB2,LOC101121497,CEP44,LOC105609145,LOC106990539,LOC105609818,LOC101109865,POLR2D,LOC101102375,LOC101111773,LOC105611746,CWC22,GNRH1,HNRNPK,LOC101123012,MSTN,LOC101115858,LOC101106395,LOC105607885,RIC1,PEBP4,HOXD1,POLR1E,CASP8,CCDC25,GLRA3,DLX2,RIF1,BAG1,LOC101114849,HR,LOC1…
2	83061601	83063200	32052994	207432142	Milk protein percentage QTL (57738)	GORASP2,RASEF,LOC106990930,WDR33,NPM2,XPO7,PIP5K1B,LOC101112634,NMRK1,RAB3GAP1,CCAR2,LOC106990932,KIAA2012,LOC105611679,RHOBTB2,LOC101121497,CEP44,LOC105609145,LOC106990539,LOC105609818,LOC101109865,POLR2D,LOC101102375,LOC101111773,LOC105611746,CWC22,GNRH1,HNRNPK,LOC101123012,MSTN,LOC101115858,LOC101106395,LOC105607885,RIC1,PEBP4,HOXD1,POLR1E,CASP8,CCDC25,GLRA3,DLX2,RIF1,BAG1,LOC101114849,HR,LOC1…
2	83350001	83351300	32052994	207432142	Milk protein percentage QTL (57738)	GORASP2,RASEF,LOC106990930,WDR33,NPM2,XPO7,PIP5K1B,LOC101112634,NMRK1,RAB3GAP1,CCAR2,LOC106990932,KIAA2012,LOC105611679,RHOBTB2,LOC101121497,CEP44,LOC105609145,LOC106990539,LOC105609818,LOC101109865,POLR2D,LOC101102375,LOC101111773,LOC105611746,CWC22,GNRH1,HNRNPK,LOC101123012,MSTN,LOC101115858,LOC101106395,LOC105607885,RIC1,PEBP4,HOXD1,POLR1E,CASP8,CCDC25,GLRA3,DLX2,RIF1,BAG1,LOC101114849,HR,LOC1…
2	83531001	83532300	32052994	207432142	Milk protein percentage QTL (57738)	GORASP2,RASEF,LOC106990930,WDR33,NPM2,XPO7,PIP5K1B,LOC101112634,NMRK1,RAB3GAP1,CCAR2,LOC106990932,KIAA2012,LOC105611679,RHOBTB2,LOC101121497,CEP44,LOC105609145,LOC106990539,LOC105609818,LOC101109865,POLR2D,LOC101102375,LOC101111773,LOC105611746,CWC22,GNRH1,HNRNPK,LOC101123012,MSTN,LOC101115858,LOC101106395,LOC105607885,RIC1,PEBP4,HOXD1,POLR1E,CASP8,CCDC25,GLRA3,DLX2,RIF1,BAG1,LOC101114849,HR,LOC1…
2	83750301	83751600	32052994	207432142	Milk protein percentage QTL (57738)	GORASP2,RASEF,LOC106990930,WDR33,NPM2,XPO7,PIP5K1B,LOC101112634,NMRK1,RAB3GAP1,CCAR2,LOC106990932,KIAA2012,LOC105611679,RHOBTB2,LOC101121497,CEP44,LOC105609145,LOC106990539,LOC105609818,LOC101109865,POLR2D,LOC101102375,LOC101111773,LOC105611746,CWC22,GNRH1,HNRNPK,LOC101123012,MSTN,LOC101115858,LOC101106395,LOC105607885,RIC1,PEBP4,HOXD1,POLR1E,CASP8,CCDC25,GLRA3,DLX2,RIF1,BAG1,LOC101114849,HR,LOC1…
2	83866301	83867600	32052994	207432142	Milk protein percentage QTL (57738)	GORASP2,RASEF,LOC106990930,WDR33,NPM2,XPO7,PIP5K1B,LOC101112634,NMRK1,RAB3GAP1,CCAR2,LOC106990932,KIAA2012,LOC105611679,RHOBTB2,LOC101121497,CEP44,LOC105609145,LOC106990539,LOC105609818,LOC101109865,POLR2D,LOC101102375,LOC101111773,LOC105611746,CWC22,GNRH1,HNRNPK,LOC101123012,MSTN,LOC101115858,LOC101106395,LOC105607885,RIC1,PEBP4,HOXD1,POLR1E,CASP8,CCDC25,GLRA3,DLX2,RIF1,BAG1,LOC101114849,HR,LOC1…
2	84173201	84176100	32052994	207432142	Milk protein percentage QTL (57738)	GORASP2,RASEF,LOC106990930,WDR33,NPM2,XPO7,PIP5K1B,LOC101112634,NMRK1,RAB3GAP1,CCAR2,LOC106990932,KIAA2012,LOC105611679,RHOBTB2,LOC101121497,CEP44,LOC105609145,LOC106990539,LOC105609818,LOC101109865,POLR2D,LOC101102375,LOC101111773,LOC105611746,CWC22,GNRH1,HNRNPK,LOC101123012,MSTN,LOC101115858,LOC101106395,LOC105607885,RIC1,PEBP4,HOXD1,POLR1E,CASP8,CCDC25,GLRA3,DLX2,RIF1,BAG1,LOC101114849,HR,LOC1…
2	85107101	85110000	32052994	207432142	Milk protein percentage QTL (57738)	GORASP2,RASEF,LOC106990930,WDR33,NPM2,XPO7,PIP5K1B,LOC101112634,NMRK1,RAB3GAP1,CCAR2,LOC106990932,KIAA2012,LOC105611679,RHOBTB2,LOC101121497,CEP44,LOC105609145,LOC106990539,LOC105609818,LOC101109865,POLR2D,LOC101102375,LOC101111773,LOC105611746,CWC22,GNRH1,HNRNPK,LOC101123012,MSTN,LOC101115858,LOC101106395,LOC105607885,RIC1,PEBP4,HOXD1,POLR1E,CASP8,CCDC25,GLRA3,DLX2,RIF1,BAG1,LOC101114849,HR,LOC1…
2	85259601	85265100	32052994	207432142	Milk protein percentage QTL (57738)	GORASP2,RASEF,LOC106990930,WDR33,NPM2,XPO7,PIP5K1B,LOC101112634,NMRK1,RAB3GAP1,CCAR2,LOC106990932,KIAA2012,LOC105611679,RHOBTB2,LOC101121497,CEP44,LOC105609145,LOC106990539,LOC105609818,LOC101109865,POLR2D,LOC101102375,LOC101111773,LOC105611746,CWC22,GNRH1,HNRNPK,LOC101123012,MSTN,LOC101115858,LOC101106395,LOC105607885,RIC1,PEBP4,HOXD1,POLR1E,CASP8,CCDC25,GLRA3,DLX2,RIF1,BAG1,LOC101114849,HR,LOC1…
2	85581601	85582700	32052994	207432142	Milk protein percentage QTL (57738)	GORASP2,RASEF,LOC106990930,WDR33,NPM2,XPO7,PIP5K1B,LOC101112634,NMRK1,RAB3GAP1,CCAR2,LOC106990932,KIAA2012,LOC105611679,RHOBTB2,LOC101121497,CEP44,LOC105609145,LOC106990539,LOC105609818,LOC101109865,POLR2D,LOC101102375,LOC101111773,LOC105611746,CWC22,GNRH1,HNRNPK,LOC101123012,MSTN,LOC101115858,LOC101106395,LOC105607885,RIC1,PEBP4,HOXD1,POLR1E,CASP8,CCDC25,GLRA3,DLX2,RIF1,BAG1,LOC101114849,HR,LOC1…
2	85793101	85794400	32052994	207432142	Milk protein percentage QTL (57738)	GORASP2,RASEF,LOC106990930,WDR33,NPM2,XPO7,PIP5K1B,LOC101112634,NMRK1,RAB3GAP1,CCAR2,LOC106990932,KIAA2012,LOC105611679,RHOBTB2,LOC101121497,CEP44,LOC105609145,LOC106990539,LOC105609818,LOC101109865,POLR2D,LOC101102375,LOC101111773,LOC105611746,CWC22,GNRH1,HNRNPK,LOC101123012,MSTN,LOC101115858,LOC101106395,LOC105607885,RIC1,PEBP4,HOXD1,POLR1E,CASP8,CCDC25,GLRA3,DLX2,RIF1,BAG1,LOC101114849,HR,LOC1…
2	86083101	86084400	32052994	207432142	Milk protein percentage QTL (57738)	GORASP2,RASEF,LOC106990930,WDR33,NPM2,XPO7,PIP5K1B,LOC101112634,NMRK1,RAB3GAP1,CCAR2,LOC106990932,KIAA2012,LOC105611679,RHOBTB2,LOC101121497,CEP44,LOC105609145,LOC106990539,LOC105609818,LOC101109865,POLR2D,LOC101102375,LOC101111773,LOC105611746,CWC22,GNRH1,HNRNPK,LOC101123012,MSTN,LOC101115858,LOC101106395,LOC105607885,RIC1,PEBP4,HOXD1,POLR1E,CASP8,CCDC25,GLRA3,DLX2,RIF1,BAG1,LOC101114849,HR,LOC1…
2	86378101	86383900	32052994	207432142	Milk protein percentage QTL (57738)	GORASP2,RASEF,LOC106990930,WDR33,NPM2,XPO7,PIP5K1B,LOC101112634,NMRK1,RAB3GAP1,CCAR2,LOC106990932,KIAA2012,LOC105611679,RHOBTB2,LOC101121497,CEP44,LOC105609145,LOC106990539,LOC105609818,LOC101109865,POLR2D,LOC101102375,LOC101111773,LOC105611746,CWC22,GNRH1,HNRNPK,LOC101123012,MSTN,LOC101115858,LOC101106395,LOC105607885,RIC1,PEBP4,HOXD1,POLR1E,CASP8,CCDC25,GLRA3,DLX2,RIF1,BAG1,LOC101114849,HR,LOC1…
2	86612101	86613200	32052994	207432142	Milk protein percentage QTL (57738)	GORASP2,RASEF,LOC106990930,WDR33,NPM2,XPO7,PIP5K1B,LOC101112634,NMRK1,RAB3GAP1,CCAR2,LOC106990932,KIAA2012,LOC105611679,RHOBTB2,LOC101121497,CEP44,LOC105609145,LOC106990539,LOC105609818,LOC101109865,POLR2D,LOC101102375,LOC101111773,LOC105611746,CWC22,GNRH1,HNRNPK,LOC101123012,MSTN,LOC101115858,LOC101106395,LOC105607885,RIC1,PEBP4,HOXD1,POLR1E,CASP8,CCDC25,GLRA3,DLX2,RIF1,BAG1,LOC101114849,HR,LOC1…
2	86954701	86956100	32052994	207432142	Milk protein percentage QTL (57738)	GORASP2,RASEF,LOC106990930,WDR33,NPM2,XPO7,PIP5K1B,LOC101112634,NMRK1,RAB3GAP1,CCAR2,LOC106990932,KIAA2012,LOC105611679,RHOBTB2,LOC101121497,CEP44,LOC105609145,LOC106990539,LOC105609818,LOC101109865,POLR2D,LOC101102375,LOC101111773,LOC105611746,CWC22,GNRH1,HNRNPK,LOC101123012,MSTN,LOC101115858,LOC101106395,LOC105607885,RIC1,PEBP4,HOXD1,POLR1E,CASP8,CCDC25,GLRA3,DLX2,RIF1,BAG1,LOC101114849,HR,LOC1…
2	87170901	87172200	32052994	207432142	Milk protein percentage QTL (57738)	GORASP2,RASEF,LOC106990930,WDR33,NPM2,XPO7,PIP5K1B,LOC101112634,NMRK1,RAB3GAP1,CCAR2,LOC106990932,KIAA2012,LOC105611679,RHOBTB2,LOC101121497,CEP44,LOC105609145,LOC106990539,LOC105609818,LOC101109865,POLR2D,LOC101102375,LOC101111773,LOC105611746,CWC22,GNRH1,HNRNPK,LOC101123012,MSTN,LOC101115858,LOC101106395,LOC105607885,RIC1,PEBP4,HOXD1,POLR1E,CASP8,CCDC25,GLRA3,DLX2,RIF1,BAG1,LOC101114849,HR,LOC1…
2	87212101	87213100	32052994	207432142	Milk protein percentage QTL (57738)	GORASP2,RASEF,LOC106990930,WDR33,NPM2,XPO7,PIP5K1B,LOC101112634,NMRK1,RAB3GAP1,CCAR2,LOC106990932,KIAA2012,LOC105611679,RHOBTB2,LOC101121497,CEP44,LOC105609145,LOC106990539,LOC105609818,LOC101109865,POLR2D,LOC101102375,LOC101111773,LOC105611746,CWC22,GNRH1,HNRNPK,LOC101123012,MSTN,LOC101115858,LOC101106395,LOC105607885,RIC1,PEBP4,HOXD1,POLR1E,CASP8,CCDC25,GLRA3,DLX2,RIF1,BAG1,LOC101114849,HR,LOC1…
2	87494901	87496000	32052994	207432142	Milk protein percentage QTL (57738)	GORASP2,RASEF,LOC106990930,WDR33,NPM2,XPO7,PIP5K1B,LOC101112634,NMRK1,RAB3GAP1,CCAR2,LOC106990932,KIAA2012,LOC105611679,RHOBTB2,LOC101121497,CEP44,LOC105609145,LOC106990539,LOC105609818,LOC101109865,POLR2D,LOC101102375,LOC101111773,LOC105611746,CWC22,GNRH1,HNRNPK,LOC101123012,MSTN,LOC101115858,LOC101106395,LOC105607885,RIC1,PEBP4,HOXD1,POLR1E,CASP8,CCDC25,GLRA3,DLX2,RIF1,BAG1,LOC101114849,HR,LOC1…
2	87541901	87547400	32052994	207432142	Milk protein percentage QTL (57738)	GORASP2,RASEF,LOC106990930,WDR33,NPM2,XPO7,PIP5K1B,LOC101112634,NMRK1,RAB3GAP1,CCAR2,LOC106990932,KIAA2012,LOC105611679,RHOBTB2,LOC101121497,CEP44,LOC105609145,LOC106990539,LOC105609818,LOC101109865,POLR2D,LOC101102375,LOC101111773,LOC105611746,CWC22,GNRH1,HNRNPK,LOC101123012,MSTN,LOC101115858,LOC101106395,LOC105607885,RIC1,PEBP4,HOXD1,POLR1E,CASP8,CCDC25,GLRA3,DLX2,RIF1,BAG1,LOC101114849,HR,LOC1…
2	87636901	87637900	32052994	207432142	Milk protein percentage QTL (57738)	GORASP2,RASEF,LOC106990930,WDR33,NPM2,XPO7,PIP5K1B,LOC101112634,NMRK1,RAB3GAP1,CCAR2,LOC106990932,KIAA2012,LOC105611679,RHOBTB2,LOC101121497,CEP44,LOC105609145,LOC106990539,LOC105609818,LOC101109865,POLR2D,LOC101102375,LOC101111773,LOC105611746,CWC22,GNRH1,HNRNPK,LOC101123012,MSTN,LOC101115858,LOC101106395,LOC105607885,RIC1,PEBP4,HOXD1,POLR1E,CASP8,CCDC25,GLRA3,DLX2,RIF1,BAG1,LOC101114849,HR,LOC1…
2	88132201	88134100	32052994	207432142	Milk protein percentage QTL (57738)	GORASP2,RASEF,LOC106990930,WDR33,NPM2,XPO7,PIP5K1B,LOC101112634,NMRK1,RAB3GAP1,CCAR2,LOC106990932,KIAA2012,LOC105611679,RHOBTB2,LOC101121497,CEP44,LOC105609145,LOC106990539,LOC105609818,LOC101109865,POLR2D,LOC101102375,LOC101111773,LOC105611746,CWC22,GNRH1,HNRNPK,LOC101123012,MSTN,LOC101115858,LOC101106395,LOC105607885,RIC1,PEBP4,HOXD1,POLR1E,CASP8,CCDC25,GLRA3,DLX2,RIF1,BAG1,LOC101114849,HR,LOC1…
2	88665901	88667900	32052994	207432142	Milk protein percentage QTL (57738)	GORASP2,RASEF,LOC106990930,WDR33,NPM2,XPO7,PIP5K1B,LOC101112634,NMRK1,RAB3GAP1,CCAR2,LOC106990932,KIAA2012,LOC105611679,RHOBTB2,LOC101121497,CEP44,LOC105609145,LOC106990539,LOC105609818,LOC101109865,POLR2D,LOC101102375,LOC101111773,LOC105611746,CWC22,GNRH1,HNRNPK,LOC101123012,MSTN,LOC101115858,LOC101106395,LOC105607885,RIC1,PEBP4,HOXD1,POLR1E,CASP8,CCDC25,GLRA3,DLX2,RIF1,BAG1,LOC101114849,HR,LOC1…
2	88678501	88680500	32052994	207432142	Milk protein percentage QTL (57738)	GORASP2,RASEF,LOC106990930,WDR33,NPM2,XPO7,PIP5K1B,LOC101112634,NMRK1,RAB3GAP1,CCAR2,LOC106990932,KIAA2012,LOC105611679,RHOBTB2,LOC101121497,CEP44,LOC105609145,LOC106990539,LOC105609818,LOC101109865,POLR2D,LOC101102375,LOC101111773,LOC105611746,CWC22,GNRH1,HNRNPK,LOC101123012,MSTN,LOC101115858,LOC101106395,LOC105607885,RIC1,PEBP4,HOXD1,POLR1E,CASP8,CCDC25,GLRA3,DLX2,RIF1,BAG1,LOC101114849,HR,LOC1…
2	88863301	88864300	32052994	207432142	Milk protein percentage QTL (57738)	GORASP2,RASEF,LOC106990930,WDR33,NPM2,XPO7,PIP5K1B,LOC101112634,NMRK1,RAB3GAP1,CCAR2,LOC106990932,KIAA2012,LOC105611679,RHOBTB2,LOC101121497,CEP44,LOC105609145,LOC106990539,LOC105609818,LOC101109865,POLR2D,LOC101102375,LOC101111773,LOC105611746,CWC22,GNRH1,HNRNPK,LOC101123012,MSTN,LOC101115858,LOC101106395,LOC105607885,RIC1,PEBP4,HOXD1,POLR1E,CASP8,CCDC25,GLRA3,DLX2,RIF1,BAG1,LOC101114849,HR,LOC1…
2	88933501	88941700	32052994	207432142	Milk protein percentage QTL (57738)	GORASP2,RASEF,LOC106990930,WDR33,NPM2,XPO7,PIP5K1B,LOC101112634,NMRK1,RAB3GAP1,CCAR2,LOC106990932,KIAA2012,LOC105611679,RHOBTB2,LOC101121497,CEP44,LOC105609145,LOC106990539,LOC105609818,LOC101109865,POLR2D,LOC101102375,LOC101111773,LOC105611746,CWC22,GNRH1,HNRNPK,LOC101123012,MSTN,LOC101115858,LOC101106395,LOC105607885,RIC1,PEBP4,HOXD1,POLR1E,CASP8,CCDC25,GLRA3,DLX2,RIF1,BAG1,LOC101114849,HR,LOC1…
2	88941801	88945300	32052994	207432142	Milk protein percentage QTL (57738)	GORASP2,RASEF,LOC106990930,WDR33,NPM2,XPO7,PIP5K1B,LOC101112634,NMRK1,RAB3GAP1,CCAR2,LOC106990932,KIAA2012,LOC105611679,RHOBTB2,LOC101121497,CEP44,LOC105609145,LOC106990539,LOC105609818,LOC101109865,POLR2D,LOC101102375,LOC101111773,LOC105611746,CWC22,GNRH1,HNRNPK,LOC101123012,MSTN,LOC101115858,LOC101106395,LOC105607885,RIC1,PEBP4,HOXD1,POLR1E,CASP8,CCDC25,GLRA3,DLX2,RIF1,BAG1,LOC101114849,HR,LOC1…
2	88945301	88950700	32052994	207432142	Milk protein percentage QTL (57738)	GORASP2,RASEF,LOC106990930,WDR33,NPM2,XPO7,PIP5K1B,LOC101112634,NMRK1,RAB3GAP1,CCAR2,LOC106990932,KIAA2012,LOC105611679,RHOBTB2,LOC101121497,CEP44,LOC105609145,LOC106990539,LOC105609818,LOC101109865,POLR2D,LOC101102375,LOC101111773,LOC105611746,CWC22,GNRH1,HNRNPK,LOC101123012,MSTN,LOC101115858,LOC101106395,LOC105607885,RIC1,PEBP4,HOXD1,POLR1E,CASP8,CCDC25,GLRA3,DLX2,RIF1,BAG1,LOC101114849,HR,LOC1…
2	88951601	88953500	32052994	207432142	Milk protein percentage QTL (57738)	GORASP2,RASEF,LOC106990930,WDR33,NPM2,XPO7,PIP5K1B,LOC101112634,NMRK1,RAB3GAP1,CCAR2,LOC106990932,KIAA2012,LOC105611679,RHOBTB2,LOC101121497,CEP44,LOC105609145,LOC106990539,LOC105609818,LOC101109865,POLR2D,LOC101102375,LOC101111773,LOC105611746,CWC22,GNRH1,HNRNPK,LOC101123012,MSTN,LOC101115858,LOC101106395,LOC105607885,RIC1,PEBP4,HOXD1,POLR1E,CASP8,CCDC25,GLRA3,DLX2,RIF1,BAG1,LOC101114849,HR,LOC1…
2	88953701	88955400	32052994	207432142	Milk protein percentage QTL (57738)	GORASP2,RASEF,LOC106990930,WDR33,NPM2,XPO7,PIP5K1B,LOC101112634,NMRK1,RAB3GAP1,CCAR2,LOC106990932,KIAA2012,LOC105611679,RHOBTB2,LOC101121497,CEP44,LOC105609145,LOC106990539,LOC105609818,LOC101109865,POLR2D,LOC101102375,LOC101111773,LOC105611746,CWC22,GNRH1,HNRNPK,LOC101123012,MSTN,LOC101115858,LOC101106395,LOC105607885,RIC1,PEBP4,HOXD1,POLR1E,CASP8,CCDC25,GLRA3,DLX2,RIF1,BAG1,LOC101114849,HR,LOC1…
2	88955501	88956500	32052994	207432142	Milk protein percentage QTL (57738)	GORASP2,RASEF,LOC106990930,WDR33,NPM2,XPO7,PIP5K1B,LOC101112634,NMRK1,RAB3GAP1,CCAR2,LOC106990932,KIAA2012,LOC105611679,RHOBTB2,LOC101121497,CEP44,LOC105609145,LOC106990539,LOC105609818,LOC101109865,POLR2D,LOC101102375,LOC101111773,LOC105611746,CWC22,GNRH1,HNRNPK,LOC101123012,MSTN,LOC101115858,LOC101106395,LOC105607885,RIC1,PEBP4,HOXD1,POLR1E,CASP8,CCDC25,GLRA3,DLX2,RIF1,BAG1,LOC101114849,HR,LOC1…
2	88956501	88966000	32052994	207432142	Milk protein percentage QTL (57738)	GORASP2,RASEF,LOC106990930,WDR33,NPM2,XPO7,PIP5K1B,LOC101112634,NMRK1,RAB3GAP1,CCAR2,LOC106990932,KIAA2012,LOC105611679,RHOBTB2,LOC101121497,CEP44,LOC105609145,LOC106990539,LOC105609818,LOC101109865,POLR2D,LOC101102375,LOC101111773,LOC105611746,CWC22,GNRH1,HNRNPK,LOC101123012,MSTN,LOC101115858,LOC101106395,LOC105607885,RIC1,PEBP4,HOXD1,POLR1E,CASP8,CCDC25,GLRA3,DLX2,RIF1,BAG1,LOC101114849,HR,LOC1…
2	88967001	88973300	32052994	207432142	Milk protein percentage QTL (57738)	GORASP2,RASEF,LOC106990930,WDR33,NPM2,XPO7,PIP5K1B,LOC101112634,NMRK1,RAB3GAP1,CCAR2,LOC106990932,KIAA2012,LOC105611679,RHOBTB2,LOC101121497,CEP44,LOC105609145,LOC106990539,LOC105609818,LOC101109865,POLR2D,LOC101102375,LOC101111773,LOC105611746,CWC22,GNRH1,HNRNPK,LOC101123012,MSTN,LOC101115858,LOC101106395,LOC105607885,RIC1,PEBP4,HOXD1,POLR1E,CASP8,CCDC25,GLRA3,DLX2,RIF1,BAG1,LOC101114849,HR,LOC1…
2	88995301	89007700	32052994	207432142	Milk protein percentage QTL (57738)	GORASP2,RASEF,LOC106990930,WDR33,NPM2,XPO7,PIP5K1B,LOC101112634,NMRK1,RAB3GAP1,CCAR2,LOC106990932,KIAA2012,LOC105611679,RHOBTB2,LOC101121497,CEP44,LOC105609145,LOC106990539,LOC105609818,LOC101109865,POLR2D,LOC101102375,LOC101111773,LOC105611746,CWC22,GNRH1,HNRNPK,LOC101123012,MSTN,LOC101115858,LOC101106395,LOC105607885,RIC1,PEBP4,HOXD1,POLR1E,CASP8,CCDC25,GLRA3,DLX2,RIF1,BAG1,LOC101114849,HR,LOC1…
2	89007701	89013000	32052994	207432142	Milk protein percentage QTL (57738)	GORASP2,RASEF,LOC106990930,WDR33,NPM2,XPO7,PIP5K1B,LOC101112634,NMRK1,RAB3GAP1,CCAR2,LOC106990932,KIAA2012,LOC105611679,RHOBTB2,LOC101121497,CEP44,LOC105609145,LOC106990539,LOC105609818,LOC101109865,POLR2D,LOC101102375,LOC101111773,LOC105611746,CWC22,GNRH1,HNRNPK,LOC101123012,MSTN,LOC101115858,LOC101106395,LOC105607885,RIC1,PEBP4,HOXD1,POLR1E,CASP8,CCDC25,GLRA3,DLX2,RIF1,BAG1,LOC101114849,HR,LOC1…
2	89136201	89157700	32052994	207432142	Milk protein percentage QTL (57738)	GORASP2,RASEF,LOC106990930,WDR33,NPM2,XPO7,PIP5K1B,LOC101112634,NMRK1,RAB3GAP1,CCAR2,LOC106990932,KIAA2012,LOC105611679,RHOBTB2,LOC101121497,CEP44,LOC105609145,LOC106990539,LOC105609818,LOC101109865,POLR2D,LOC101102375,LOC101111773,LOC105611746,CWC22,GNRH1,HNRNPK,LOC101123012,MSTN,LOC101115858,LOC101106395,LOC105607885,RIC1,PEBP4,HOXD1,POLR1E,CASP8,CCDC25,GLRA3,DLX2,RIF1,BAG1,LOC101114849,HR,LOC1…
2	89168201	89172400	32052994	207432142	Milk protein percentage QTL (57738)	GORASP2,RASEF,LOC106990930,WDR33,NPM2,XPO7,PIP5K1B,LOC101112634,NMRK1,RAB3GAP1,CCAR2,LOC106990932,KIAA2012,LOC105611679,RHOBTB2,LOC101121497,CEP44,LOC105609145,LOC106990539,LOC105609818,LOC101109865,POLR2D,LOC101102375,LOC101111773,LOC105611746,CWC22,GNRH1,HNRNPK,LOC101123012,MSTN,LOC101115858,LOC101106395,LOC105607885,RIC1,PEBP4,HOXD1,POLR1E,CASP8,CCDC25,GLRA3,DLX2,RIF1,BAG1,LOC101114849,HR,LOC1…
2	89172701	89183100	32052994	207432142	Milk protein percentage QTL (57738)	GORASP2,RASEF,LOC106990930,WDR33,NPM2,XPO7,PIP5K1B,LOC101112634,NMRK1,RAB3GAP1,CCAR2,LOC106990932,KIAA2012,LOC105611679,RHOBTB2,LOC101121497,CEP44,LOC105609145,LOC106990539,LOC105609818,LOC101109865,POLR2D,LOC101102375,LOC101111773,LOC105611746,CWC22,GNRH1,HNRNPK,LOC101123012,MSTN,LOC101115858,LOC101106395,LOC105607885,RIC1,PEBP4,HOXD1,POLR1E,CASP8,CCDC25,GLRA3,DLX2,RIF1,BAG1,LOC101114849,HR,LOC1…
2	89185701	89189700	32052994	207432142	Milk protein percentage QTL (57738)	GORASP2,RASEF,LOC106990930,WDR33,NPM2,XPO7,PIP5K1B,LOC101112634,NMRK1,RAB3GAP1,CCAR2,LOC106990932,KIAA2012,LOC105611679,RHOBTB2,LOC101121497,CEP44,LOC105609145,LOC106990539,LOC105609818,LOC101109865,POLR2D,LOC101102375,LOC101111773,LOC105611746,CWC22,GNRH1,HNRNPK,LOC101123012,MSTN,LOC101115858,LOC101106395,LOC105607885,RIC1,PEBP4,HOXD1,POLR1E,CASP8,CCDC25,GLRA3,DLX2,RIF1,BAG1,LOC101114849,HR,LOC1…
2	89193101	89201500	32052994	207432142	Milk protein percentage QTL (57738)	GORASP2,RASEF,LOC106990930,WDR33,NPM2,XPO7,PIP5K1B,LOC101112634,NMRK1,RAB3GAP1,CCAR2,LOC106990932,KIAA2012,LOC105611679,RHOBTB2,LOC101121497,CEP44,LOC105609145,LOC106990539,LOC105609818,LOC101109865,POLR2D,LOC101102375,LOC101111773,LOC105611746,CWC22,GNRH1,HNRNPK,LOC101123012,MSTN,LOC101115858,LOC101106395,LOC105607885,RIC1,PEBP4,HOXD1,POLR1E,CASP8,CCDC25,GLRA3,DLX2,RIF1,BAG1,LOC101114849,HR,LOC1…
2	89231501	89243400	32052994	207432142	Milk protein percentage QTL (57738)	GORASP2,RASEF,LOC106990930,WDR33,NPM2,XPO7,PIP5K1B,LOC101112634,NMRK1,RAB3GAP1,CCAR2,LOC106990932,KIAA2012,LOC105611679,RHOBTB2,LOC101121497,CEP44,LOC105609145,LOC106990539,LOC105609818,LOC101109865,POLR2D,LOC101102375,LOC101111773,LOC105611746,CWC22,GNRH1,HNRNPK,LOC101123012,MSTN,LOC101115858,LOC101106395,LOC105607885,RIC1,PEBP4,HOXD1,POLR1E,CASP8,CCDC25,GLRA3,DLX2,RIF1,BAG1,LOC101114849,HR,LOC1…
2	89255001	89262300	32052994	207432142	Milk protein percentage QTL (57738)	GORASP2,RASEF,LOC106990930,WDR33,NPM2,XPO7,PIP5K1B,LOC101112634,NMRK1,RAB3GAP1,CCAR2,LOC106990932,KIAA2012,LOC105611679,RHOBTB2,LOC101121497,CEP44,LOC105609145,LOC106990539,LOC105609818,LOC101109865,POLR2D,LOC101102375,LOC101111773,LOC105611746,CWC22,GNRH1,HNRNPK,LOC101123012,MSTN,LOC101115858,LOC101106395,LOC105607885,RIC1,PEBP4,HOXD1,POLR1E,CASP8,CCDC25,GLRA3,DLX2,RIF1,BAG1,LOC101114849,HR,LOC1…
2	89263701	89267000	32052994	207432142	Milk protein percentage QTL (57738)	GORASP2,RASEF,LOC106990930,WDR33,NPM2,XPO7,PIP5K1B,LOC101112634,NMRK1,RAB3GAP1,CCAR2,LOC106990932,KIAA2012,LOC105611679,RHOBTB2,LOC101121497,CEP44,LOC105609145,LOC106990539,LOC105609818,LOC101109865,POLR2D,LOC101102375,LOC101111773,LOC105611746,CWC22,GNRH1,HNRNPK,LOC101123012,MSTN,LOC101115858,LOC101106395,LOC105607885,RIC1,PEBP4,HOXD1,POLR1E,CASP8,CCDC25,GLRA3,DLX2,RIF1,BAG1,LOC101114849,HR,LOC1…
2	89267001	89275700	32052994	207432142	Milk protein percentage QTL (57738)	GORASP2,RASEF,LOC106990930,WDR33,NPM2,XPO7,PIP5K1B,LOC101112634,NMRK1,RAB3GAP1,CCAR2,LOC106990932,KIAA2012,LOC105611679,RHOBTB2,LOC101121497,CEP44,LOC105609145,LOC106990539,LOC105609818,LOC101109865,POLR2D,LOC101102375,LOC101111773,LOC105611746,CWC22,GNRH1,HNRNPK,LOC101123012,MSTN,LOC101115858,LOC101106395,LOC105607885,RIC1,PEBP4,HOXD1,POLR1E,CASP8,CCDC25,GLRA3,DLX2,RIF1,BAG1,LOC101114849,HR,LOC1…
2	89586101	89589500	32052994	207432142	Milk protein percentage QTL (57738)	GORASP2,RASEF,LOC106990930,WDR33,NPM2,XPO7,PIP5K1B,LOC101112634,NMRK1,RAB3GAP1,CCAR2,LOC106990932,KIAA2012,LOC105611679,RHOBTB2,LOC101121497,CEP44,LOC105609145,LOC106990539,LOC105609818,LOC101109865,POLR2D,LOC101102375,LOC101111773,LOC105611746,CWC22,GNRH1,HNRNPK,LOC101123012,MSTN,LOC101115858,LOC101106395,LOC105607885,RIC1,PEBP4,HOXD1,POLR1E,CASP8,CCDC25,GLRA3,DLX2,RIF1,BAG1,LOC101114849,HR,LOC1…
2	89856201	89857200	32052994	207432142	Milk protein percentage QTL (57738)	GORASP2,RASEF,LOC106990930,WDR33,NPM2,XPO7,PIP5K1B,LOC101112634,NMRK1,RAB3GAP1,CCAR2,LOC106990932,KIAA2012,LOC105611679,RHOBTB2,LOC101121497,CEP44,LOC105609145,LOC106990539,LOC105609818,LOC101109865,POLR2D,LOC101102375,LOC101111773,LOC105611746,CWC22,GNRH1,HNRNPK,LOC101123012,MSTN,LOC101115858,LOC101106395,LOC105607885,RIC1,PEBP4,HOXD1,POLR1E,CASP8,CCDC25,GLRA3,DLX2,RIF1,BAG1,LOC101114849,HR,LOC1…
2	90213301	90214900	32052994	207432142	Milk protein percentage QTL (57738)	GORASP2,RASEF,LOC106990930,WDR33,NPM2,XPO7,PIP5K1B,LOC101112634,NMRK1,RAB3GAP1,CCAR2,LOC106990932,KIAA2012,LOC105611679,RHOBTB2,LOC101121497,CEP44,LOC105609145,LOC106990539,LOC105609818,LOC101109865,POLR2D,LOC101102375,LOC101111773,LOC105611746,CWC22,GNRH1,HNRNPK,LOC101123012,MSTN,LOC101115858,LOC101106395,LOC105607885,RIC1,PEBP4,HOXD1,POLR1E,CASP8,CCDC25,GLRA3,DLX2,RIF1,BAG1,LOC101114849,HR,LOC1…
2	90224401	90229700	32052994	207432142	Milk protein percentage QTL (57738)	GORASP2,RASEF,LOC106990930,WDR33,NPM2,XPO7,PIP5K1B,LOC101112634,NMRK1,RAB3GAP1,CCAR2,LOC106990932,KIAA2012,LOC105611679,RHOBTB2,LOC101121497,CEP44,LOC105609145,LOC106990539,LOC105609818,LOC101109865,POLR2D,LOC101102375,LOC101111773,LOC105611746,CWC22,GNRH1,HNRNPK,LOC101123012,MSTN,LOC101115858,LOC101106395,LOC105607885,RIC1,PEBP4,HOXD1,POLR1E,CASP8,CCDC25,GLRA3,DLX2,RIF1,BAG1,LOC101114849,HR,LOC1…
2	90234601	90236200	32052994	207432142	Milk protein percentage QTL (57738)	GORASP2,RASEF,LOC106990930,WDR33,NPM2,XPO7,PIP5K1B,LOC101112634,NMRK1,RAB3GAP1,CCAR2,LOC106990932,KIAA2012,LOC105611679,RHOBTB2,LOC101121497,CEP44,LOC105609145,LOC106990539,LOC105609818,LOC101109865,POLR2D,LOC101102375,LOC101111773,LOC105611746,CWC22,GNRH1,HNRNPK,LOC101123012,MSTN,LOC101115858,LOC101106395,LOC105607885,RIC1,PEBP4,HOXD1,POLR1E,CASP8,CCDC25,GLRA3,DLX2,RIF1,BAG1,LOC101114849,HR,LOC1…
2	90266101	90270100	32052994	207432142	Milk protein percentage QTL (57738)	GORASP2,RASEF,LOC106990930,WDR33,NPM2,XPO7,PIP5K1B,LOC101112634,NMRK1,RAB3GAP1,CCAR2,LOC106990932,KIAA2012,LOC105611679,RHOBTB2,LOC101121497,CEP44,LOC105609145,LOC106990539,LOC105609818,LOC101109865,POLR2D,LOC101102375,LOC101111773,LOC105611746,CWC22,GNRH1,HNRNPK,LOC101123012,MSTN,LOC101115858,LOC101106395,LOC105607885,RIC1,PEBP4,HOXD1,POLR1E,CASP8,CCDC25,GLRA3,DLX2,RIF1,BAG1,LOC101114849,HR,LOC1…
2	90382801	90383900	32052994	207432142	Milk protein percentage QTL (57738)	GORASP2,RASEF,LOC106990930,WDR33,NPM2,XPO7,PIP5K1B,LOC101112634,NMRK1,RAB3GAP1,CCAR2,LOC106990932,KIAA2012,LOC105611679,RHOBTB2,LOC101121497,CEP44,LOC105609145,LOC106990539,LOC105609818,LOC101109865,POLR2D,LOC101102375,LOC101111773,LOC105611746,CWC22,GNRH1,HNRNPK,LOC101123012,MSTN,LOC101115858,LOC101106395,LOC105607885,RIC1,PEBP4,HOXD1,POLR1E,CASP8,CCDC25,GLRA3,DLX2,RIF1,BAG1,LOC101114849,HR,LOC1…
2	90533601	90534800	32052994	207432142	Milk protein percentage QTL (57738)	GORASP2,RASEF,LOC106990930,WDR33,NPM2,XPO7,PIP5K1B,LOC101112634,NMRK1,RAB3GAP1,CCAR2,LOC106990932,KIAA2012,LOC105611679,RHOBTB2,LOC101121497,CEP44,LOC105609145,LOC106990539,LOC105609818,LOC101109865,POLR2D,LOC101102375,LOC101111773,LOC105611746,CWC22,GNRH1,HNRNPK,LOC101123012,MSTN,LOC101115858,LOC101106395,LOC105607885,RIC1,PEBP4,HOXD1,POLR1E,CASP8,CCDC25,GLRA3,DLX2,RIF1,BAG1,LOC101114849,HR,LOC1…
2	90541601	90546400	32052994	207432142	Milk protein percentage QTL (57738)	GORASP2,RASEF,LOC106990930,WDR33,NPM2,XPO7,PIP5K1B,LOC101112634,NMRK1,RAB3GAP1,CCAR2,LOC106990932,KIAA2012,LOC105611679,RHOBTB2,LOC101121497,CEP44,LOC105609145,LOC106990539,LOC105609818,LOC101109865,POLR2D,LOC101102375,LOC101111773,LOC105611746,CWC22,GNRH1,HNRNPK,LOC101123012,MSTN,LOC101115858,LOC101106395,LOC105607885,RIC1,PEBP4,HOXD1,POLR1E,CASP8,CCDC25,GLRA3,DLX2,RIF1,BAG1,LOC101114849,HR,LOC1…
2	90906901	90907900	32052994	207432142	Milk protein percentage QTL (57738)	GORASP2,RASEF,LOC106990930,WDR33,NPM2,XPO7,PIP5K1B,LOC101112634,NMRK1,RAB3GAP1,CCAR2,LOC106990932,KIAA2012,LOC105611679,RHOBTB2,LOC101121497,CEP44,LOC105609145,LOC106990539,LOC105609818,LOC101109865,POLR2D,LOC101102375,LOC101111773,LOC105611746,CWC22,GNRH1,HNRNPK,LOC101123012,MSTN,LOC101115858,LOC101106395,LOC105607885,RIC1,PEBP4,HOXD1,POLR1E,CASP8,CCDC25,GLRA3,DLX2,RIF1,BAG1,LOC101114849,HR,LOC1…
2	91170101	91171700	32052994	207432142	Milk protein percentage QTL (57738)	GORASP2,RASEF,LOC106990930,WDR33,NPM2,XPO7,PIP5K1B,LOC101112634,NMRK1,RAB3GAP1,CCAR2,LOC106990932,KIAA2012,LOC105611679,RHOBTB2,LOC101121497,CEP44,LOC105609145,LOC106990539,LOC105609818,LOC101109865,POLR2D,LOC101102375,LOC101111773,LOC105611746,CWC22,GNRH1,HNRNPK,LOC101123012,MSTN,LOC101115858,LOC101106395,LOC105607885,RIC1,PEBP4,HOXD1,POLR1E,CASP8,CCDC25,GLRA3,DLX2,RIF1,BAG1,LOC101114849,HR,LOC1…
2	91708701	91710300	32052994	207432142	Milk protein percentage QTL (57738)	GORASP2,RASEF,LOC106990930,WDR33,NPM2,XPO7,PIP5K1B,LOC101112634,NMRK1,RAB3GAP1,CCAR2,LOC106990932,KIAA2012,LOC105611679,RHOBTB2,LOC101121497,CEP44,LOC105609145,LOC106990539,LOC105609818,LOC101109865,POLR2D,LOC101102375,LOC101111773,LOC105611746,CWC22,GNRH1,HNRNPK,LOC101123012,MSTN,LOC101115858,LOC101106395,LOC105607885,RIC1,PEBP4,HOXD1,POLR1E,CASP8,CCDC25,GLRA3,DLX2,RIF1,BAG1,LOC101114849,HR,LOC1…
2	91915801	91917500	32052994	207432142	Milk protein percentage QTL (57738)	GORASP2,RASEF,LOC106990930,WDR33,NPM2,XPO7,PIP5K1B,LOC101112634,NMRK1,RAB3GAP1,CCAR2,LOC106990932,KIAA2012,LOC105611679,RHOBTB2,LOC101121497,CEP44,LOC105609145,LOC106990539,LOC105609818,LOC101109865,POLR2D,LOC101102375,LOC101111773,LOC105611746,CWC22,GNRH1,HNRNPK,LOC101123012,MSTN,LOC101115858,LOC101106395,LOC105607885,RIC1,PEBP4,HOXD1,POLR1E,CASP8,CCDC25,GLRA3,DLX2,RIF1,BAG1,LOC101114849,HR,LOC1…
2	91970101	91971300	32052994	207432142	Milk protein percentage QTL (57738)	GORASP2,RASEF,LOC106990930,WDR33,NPM2,XPO7,PIP5K1B,LOC101112634,NMRK1,RAB3GAP1,CCAR2,LOC106990932,KIAA2012,LOC105611679,RHOBTB2,LOC101121497,CEP44,LOC105609145,LOC106990539,LOC105609818,LOC101109865,POLR2D,LOC101102375,LOC101111773,LOC105611746,CWC22,GNRH1,HNRNPK,LOC101123012,MSTN,LOC101115858,LOC101106395,LOC105607885,RIC1,PEBP4,HOXD1,POLR1E,CASP8,CCDC25,GLRA3,DLX2,RIF1,BAG1,LOC101114849,HR,LOC1…
2	92118001	92119300	32052994	207432142	Milk protein percentage QTL (57738)	GORASP2,RASEF,LOC106990930,WDR33,NPM2,XPO7,PIP5K1B,LOC101112634,NMRK1,RAB3GAP1,CCAR2,LOC106990932,KIAA2012,LOC105611679,RHOBTB2,LOC101121497,CEP44,LOC105609145,LOC106990539,LOC105609818,LOC101109865,POLR2D,LOC101102375,LOC101111773,LOC105611746,CWC22,GNRH1,HNRNPK,LOC101123012,MSTN,LOC101115858,LOC101106395,LOC105607885,RIC1,PEBP4,HOXD1,POLR1E,CASP8,CCDC25,GLRA3,DLX2,RIF1,BAG1,LOC101114849,HR,LOC1…
2	92224201	92228700	32052994	207432142	Milk protein percentage QTL (57738)	GORASP2,RASEF,LOC106990930,WDR33,NPM2,XPO7,PIP5K1B,LOC101112634,NMRK1,RAB3GAP1,CCAR2,LOC106990932,KIAA2012,LOC105611679,RHOBTB2,LOC101121497,CEP44,LOC105609145,LOC106990539,LOC105609818,LOC101109865,POLR2D,LOC101102375,LOC101111773,LOC105611746,CWC22,GNRH1,HNRNPK,LOC101123012,MSTN,LOC101115858,LOC101106395,LOC105607885,RIC1,PEBP4,HOXD1,POLR1E,CASP8,CCDC25,GLRA3,DLX2,RIF1,BAG1,LOC101114849,HR,LOC1…
2	92279101	92280300	32052994	207432142	Milk protein percentage QTL (57738)	GORASP2,RASEF,LOC106990930,WDR33,NPM2,XPO7,PIP5K1B,LOC101112634,NMRK1,RAB3GAP1,CCAR2,LOC106990932,KIAA2012,LOC105611679,RHOBTB2,LOC101121497,CEP44,LOC105609145,LOC106990539,LOC105609818,LOC101109865,POLR2D,LOC101102375,LOC101111773,LOC105611746,CWC22,GNRH1,HNRNPK,LOC101123012,MSTN,LOC101115858,LOC101106395,LOC105607885,RIC1,PEBP4,HOXD1,POLR1E,CASP8,CCDC25,GLRA3,DLX2,RIF1,BAG1,LOC101114849,HR,LOC1…
2	92820001	92821200	32052994	207432142	Milk protein percentage QTL (57738)	GORASP2,RASEF,LOC106990930,WDR33,NPM2,XPO7,PIP5K1B,LOC101112634,NMRK1,RAB3GAP1,CCAR2,LOC106990932,KIAA2012,LOC105611679,RHOBTB2,LOC101121497,CEP44,LOC105609145,LOC106990539,LOC105609818,LOC101109865,POLR2D,LOC101102375,LOC101111773,LOC105611746,CWC22,GNRH1,HNRNPK,LOC101123012,MSTN,LOC101115858,LOC101106395,LOC105607885,RIC1,PEBP4,HOXD1,POLR1E,CASP8,CCDC25,GLRA3,DLX2,RIF1,BAG1,LOC101114849,HR,LOC1…
2	92860601	92863200	32052994	207432142	Milk protein percentage QTL (57738)	GORASP2,RASEF,LOC106990930,WDR33,NPM2,XPO7,PIP5K1B,LOC101112634,NMRK1,RAB3GAP1,CCAR2,LOC106990932,KIAA2012,LOC105611679,RHOBTB2,LOC101121497,CEP44,LOC105609145,LOC106990539,LOC105609818,LOC101109865,POLR2D,LOC101102375,LOC101111773,LOC105611746,CWC22,GNRH1,HNRNPK,LOC101123012,MSTN,LOC101115858,LOC101106395,LOC105607885,RIC1,PEBP4,HOXD1,POLR1E,CASP8,CCDC25,GLRA3,DLX2,RIF1,BAG1,LOC101114849,HR,LOC1…
2	93817801	93818900	32052994	207432142	Milk protein percentage QTL (57738)	GORASP2,RASEF,LOC106990930,WDR33,NPM2,XPO7,PIP5K1B,LOC101112634,NMRK1,RAB3GAP1,CCAR2,LOC106990932,KIAA2012,LOC105611679,RHOBTB2,LOC101121497,CEP44,LOC105609145,LOC106990539,LOC105609818,LOC101109865,POLR2D,LOC101102375,LOC101111773,LOC105611746,CWC22,GNRH1,HNRNPK,LOC101123012,MSTN,LOC101115858,LOC101106395,LOC105607885,RIC1,PEBP4,HOXD1,POLR1E,CASP8,CCDC25,GLRA3,DLX2,RIF1,BAG1,LOC101114849,HR,LOC1…
2	93964301	93965800	32052994	207432142	Milk protein percentage QTL (57738)	GORASP2,RASEF,LOC106990930,WDR33,NPM2,XPO7,PIP5K1B,LOC101112634,NMRK1,RAB3GAP1,CCAR2,LOC106990932,KIAA2012,LOC105611679,RHOBTB2,LOC101121497,CEP44,LOC105609145,LOC106990539,LOC105609818,LOC101109865,POLR2D,LOC101102375,LOC101111773,LOC105611746,CWC22,GNRH1,HNRNPK,LOC101123012,MSTN,LOC101115858,LOC101106395,LOC105607885,RIC1,PEBP4,HOXD1,POLR1E,CASP8,CCDC25,GLRA3,DLX2,RIF1,BAG1,LOC101114849,HR,LOC1…
2	94674901	94677400	32052994	207432142	Milk protein percentage QTL (57738)	GORASP2,RASEF,LOC106990930,WDR33,NPM2,XPO7,PIP5K1B,LOC101112634,NMRK1,RAB3GAP1,CCAR2,LOC106990932,KIAA2012,LOC105611679,RHOBTB2,LOC101121497,CEP44,LOC105609145,LOC106990539,LOC105609818,LOC101109865,POLR2D,LOC101102375,LOC101111773,LOC105611746,CWC22,GNRH1,HNRNPK,LOC101123012,MSTN,LOC101115858,LOC101106395,LOC105607885,RIC1,PEBP4,HOXD1,POLR1E,CASP8,CCDC25,GLRA3,DLX2,RIF1,BAG1,LOC101114849,HR,LOC1…
2	94885301	94895400	32052994	207432142	Milk protein percentage QTL (57738)	GORASP2,RASEF,LOC106990930,WDR33,NPM2,XPO7,PIP5K1B,LOC101112634,NMRK1,RAB3GAP1,CCAR2,LOC106990932,KIAA2012,LOC105611679,RHOBTB2,LOC101121497,CEP44,LOC105609145,LOC106990539,LOC105609818,LOC101109865,POLR2D,LOC101102375,LOC101111773,LOC105611746,CWC22,GNRH1,HNRNPK,LOC101123012,MSTN,LOC101115858,LOC101106395,LOC105607885,RIC1,PEBP4,HOXD1,POLR1E,CASP8,CCDC25,GLRA3,DLX2,RIF1,BAG1,LOC101114849,HR,LOC1…
2	95404301	95405400	32052994	207432142	Milk protein percentage QTL (57738)	GORASP2,RASEF,LOC106990930,WDR33,NPM2,XPO7,PIP5K1B,LOC101112634,NMRK1,RAB3GAP1,CCAR2,LOC106990932,KIAA2012,LOC105611679,RHOBTB2,LOC101121497,CEP44,LOC105609145,LOC106990539,LOC105609818,LOC101109865,POLR2D,LOC101102375,LOC101111773,LOC105611746,CWC22,GNRH1,HNRNPK,LOC101123012,MSTN,LOC101115858,LOC101106395,LOC105607885,RIC1,PEBP4,HOXD1,POLR1E,CASP8,CCDC25,GLRA3,DLX2,RIF1,BAG1,LOC101114849,HR,LOC1…
2	95765401	95769900	32052994	207432142	Milk protein percentage QTL (57738)	GORASP2,RASEF,LOC106990930,WDR33,NPM2,XPO7,PIP5K1B,LOC101112634,NMRK1,RAB3GAP1,CCAR2,LOC106990932,KIAA2012,LOC105611679,RHOBTB2,LOC101121497,CEP44,LOC105609145,LOC106990539,LOC105609818,LOC101109865,POLR2D,LOC101102375,LOC101111773,LOC105611746,CWC22,GNRH1,HNRNPK,LOC101123012,MSTN,LOC101115858,LOC101106395,LOC105607885,RIC1,PEBP4,HOXD1,POLR1E,CASP8,CCDC25,GLRA3,DLX2,RIF1,BAG1,LOC101114849,HR,LOC1…
2	96193701	96194700	32052994	207432142	Milk protein percentage QTL (57738)	GORASP2,RASEF,LOC106990930,WDR33,NPM2,XPO7,PIP5K1B,LOC101112634,NMRK1,RAB3GAP1,CCAR2,LOC106990932,KIAA2012,LOC105611679,RHOBTB2,LOC101121497,CEP44,LOC105609145,LOC106990539,LOC105609818,LOC101109865,POLR2D,LOC101102375,LOC101111773,LOC105611746,CWC22,GNRH1,HNRNPK,LOC101123012,MSTN,LOC101115858,LOC101106395,LOC105607885,RIC1,PEBP4,HOXD1,POLR1E,CASP8,CCDC25,GLRA3,DLX2,RIF1,BAG1,LOC101114849,HR,LOC1…
2	96237801	96239700	32052994	207432142	Milk protein percentage QTL (57738)	GORASP2,RASEF,LOC106990930,WDR33,NPM2,XPO7,PIP5K1B,LOC101112634,NMRK1,RAB3GAP1,CCAR2,LOC106990932,KIAA2012,LOC105611679,RHOBTB2,LOC101121497,CEP44,LOC105609145,LOC106990539,LOC105609818,LOC101109865,POLR2D,LOC101102375,LOC101111773,LOC105611746,CWC22,GNRH1,HNRNPK,LOC101123012,MSTN,LOC101115858,LOC101106395,LOC105607885,RIC1,PEBP4,HOXD1,POLR1E,CASP8,CCDC25,GLRA3,DLX2,RIF1,BAG1,LOC101114849,HR,LOC1…
2	96778401	96779900	32052994	207432142	Milk protein percentage QTL (57738)	GORASP2,RASEF,LOC106990930,WDR33,NPM2,XPO7,PIP5K1B,LOC101112634,NMRK1,RAB3GAP1,CCAR2,LOC106990932,KIAA2012,LOC105611679,RHOBTB2,LOC101121497,CEP44,LOC105609145,LOC106990539,LOC105609818,LOC101109865,POLR2D,LOC101102375,LOC101111773,LOC105611746,CWC22,GNRH1,HNRNPK,LOC101123012,MSTN,LOC101115858,LOC101106395,LOC105607885,RIC1,PEBP4,HOXD1,POLR1E,CASP8,CCDC25,GLRA3,DLX2,RIF1,BAG1,LOC101114849,HR,LOC1…
2	96809101	96810400	32052994	207432142	Milk protein percentage QTL (57738)	GORASP2,RASEF,LOC106990930,WDR33,NPM2,XPO7,PIP5K1B,LOC101112634,NMRK1,RAB3GAP1,CCAR2,LOC106990932,KIAA2012,LOC105611679,RHOBTB2,LOC101121497,CEP44,LOC105609145,LOC106990539,LOC105609818,LOC101109865,POLR2D,LOC101102375,LOC101111773,LOC105611746,CWC22,GNRH1,HNRNPK,LOC101123012,MSTN,LOC101115858,LOC101106395,LOC105607885,RIC1,PEBP4,HOXD1,POLR1E,CASP8,CCDC25,GLRA3,DLX2,RIF1,BAG1,LOC101114849,HR,LOC1…
2	97111501	97112600	32052994	207432142	Milk protein percentage QTL (57738)	GORASP2,RASEF,LOC106990930,WDR33,NPM2,XPO7,PIP5K1B,LOC101112634,NMRK1,RAB3GAP1,CCAR2,LOC106990932,KIAA2012,LOC105611679,RHOBTB2,LOC101121497,CEP44,LOC105609145,LOC106990539,LOC105609818,LOC101109865,POLR2D,LOC101102375,LOC101111773,LOC105611746,CWC22,GNRH1,HNRNPK,LOC101123012,MSTN,LOC101115858,LOC101106395,LOC105607885,RIC1,PEBP4,HOXD1,POLR1E,CASP8,CCDC25,GLRA3,DLX2,RIF1,BAG1,LOC101114849,HR,LOC1…
2	97351801	97354800	32052994	207432142	Milk protein percentage QTL (57738)	GORASP2,RASEF,LOC106990930,WDR33,NPM2,XPO7,PIP5K1B,LOC101112634,NMRK1,RAB3GAP1,CCAR2,LOC106990932,KIAA2012,LOC105611679,RHOBTB2,LOC101121497,CEP44,LOC105609145,LOC106990539,LOC105609818,LOC101109865,POLR2D,LOC101102375,LOC101111773,LOC105611746,CWC22,GNRH1,HNRNPK,LOC101123012,MSTN,LOC101115858,LOC101106395,LOC105607885,RIC1,PEBP4,HOXD1,POLR1E,CASP8,CCDC25,GLRA3,DLX2,RIF1,BAG1,LOC101114849,HR,LOC1…
2	97795001	97796600	32052994	207432142	Milk protein percentage QTL (57738)	GORASP2,RASEF,LOC106990930,WDR33,NPM2,XPO7,PIP5K1B,LOC101112634,NMRK1,RAB3GAP1,CCAR2,LOC106990932,KIAA2012,LOC105611679,RHOBTB2,LOC101121497,CEP44,LOC105609145,LOC106990539,LOC105609818,LOC101109865,POLR2D,LOC101102375,LOC101111773,LOC105611746,CWC22,GNRH1,HNRNPK,LOC101123012,MSTN,LOC101115858,LOC101106395,LOC105607885,RIC1,PEBP4,HOXD1,POLR1E,CASP8,CCDC25,GLRA3,DLX2,RIF1,BAG1,LOC101114849,HR,LOC1…
2	98120701	98122300	32052994	207432142	Milk protein percentage QTL (57738)	GORASP2,RASEF,LOC106990930,WDR33,NPM2,XPO7,PIP5K1B,LOC101112634,NMRK1,RAB3GAP1,CCAR2,LOC106990932,KIAA2012,LOC105611679,RHOBTB2,LOC101121497,CEP44,LOC105609145,LOC106990539,LOC105609818,LOC101109865,POLR2D,LOC101102375,LOC101111773,LOC105611746,CWC22,GNRH1,HNRNPK,LOC101123012,MSTN,LOC101115858,LOC101106395,LOC105607885,RIC1,PEBP4,HOXD1,POLR1E,CASP8,CCDC25,GLRA3,DLX2,RIF1,BAG1,LOC101114849,HR,LOC1…
2	98190501	98194800	32052994	207432142	Milk protein percentage QTL (57738)	GORASP2,RASEF,LOC106990930,WDR33,NPM2,XPO7,PIP5K1B,LOC101112634,NMRK1,RAB3GAP1,CCAR2,LOC106990932,KIAA2012,LOC105611679,RHOBTB2,LOC101121497,CEP44,LOC105609145,LOC106990539,LOC105609818,LOC101109865,POLR2D,LOC101102375,LOC101111773,LOC105611746,CWC22,GNRH1,HNRNPK,LOC101123012,MSTN,LOC101115858,LOC101106395,LOC105607885,RIC1,PEBP4,HOXD1,POLR1E,CASP8,CCDC25,GLRA3,DLX2,RIF1,BAG1,LOC101114849,HR,LOC1…
2	98750401	98751800	32052994	207432142	Milk protein percentage QTL (57738)	GORASP2,RASEF,LOC106990930,WDR33,NPM2,XPO7,PIP5K1B,LOC101112634,NMRK1,RAB3GAP1,CCAR2,LOC106990932,KIAA2012,LOC105611679,RHOBTB2,LOC101121497,CEP44,LOC105609145,LOC106990539,LOC105609818,LOC101109865,POLR2D,LOC101102375,LOC101111773,LOC105611746,CWC22,GNRH1,HNRNPK,LOC101123012,MSTN,LOC101115858,LOC101106395,LOC105607885,RIC1,PEBP4,HOXD1,POLR1E,CASP8,CCDC25,GLRA3,DLX2,RIF1,BAG1,LOC101114849,HR,LOC1…
2	98931001	98934900	32052994	207432142	Milk protein percentage QTL (57738)	GORASP2,RASEF,LOC106990930,WDR33,NPM2,XPO7,PIP5K1B,LOC101112634,NMRK1,RAB3GAP1,CCAR2,LOC106990932,KIAA2012,LOC105611679,RHOBTB2,LOC101121497,CEP44,LOC105609145,LOC106990539,LOC105609818,LOC101109865,POLR2D,LOC101102375,LOC101111773,LOC105611746,CWC22,GNRH1,HNRNPK,LOC101123012,MSTN,LOC101115858,LOC101106395,LOC105607885,RIC1,PEBP4,HOXD1,POLR1E,CASP8,CCDC25,GLRA3,DLX2,RIF1,BAG1,LOC101114849,HR,LOC1…
2	99060801	99062500	32052994	207432142	Milk protein percentage QTL (57738)	GORASP2,RASEF,LOC106990930,WDR33,NPM2,XPO7,PIP5K1B,LOC101112634,NMRK1,RAB3GAP1,CCAR2,LOC106990932,KIAA2012,LOC105611679,RHOBTB2,LOC101121497,CEP44,LOC105609145,LOC106990539,LOC105609818,LOC101109865,POLR2D,LOC101102375,LOC101111773,LOC105611746,CWC22,GNRH1,HNRNPK,LOC101123012,MSTN,LOC101115858,LOC101106395,LOC105607885,RIC1,PEBP4,HOXD1,POLR1E,CASP8,CCDC25,GLRA3,DLX2,RIF1,BAG1,LOC101114849,HR,LOC1…
2	99300401	99301500	32052994	207432142	Milk protein percentage QTL (57738)	GORASP2,RASEF,LOC106990930,WDR33,NPM2,XPO7,PIP5K1B,LOC101112634,NMRK1,RAB3GAP1,CCAR2,LOC106990932,KIAA2012,LOC105611679,RHOBTB2,LOC101121497,CEP44,LOC105609145,LOC106990539,LOC105609818,LOC101109865,POLR2D,LOC101102375,LOC101111773,LOC105611746,CWC22,GNRH1,HNRNPK,LOC101123012,MSTN,LOC101115858,LOC101106395,LOC105607885,RIC1,PEBP4,HOXD1,POLR1E,CASP8,CCDC25,GLRA3,DLX2,RIF1,BAG1,LOC101114849,HR,LOC1…
2	99308901	99309900	32052994	207432142	Milk protein percentage QTL (57738)	GORASP2,RASEF,LOC106990930,WDR33,NPM2,XPO7,PIP5K1B,LOC101112634,NMRK1,RAB3GAP1,CCAR2,LOC106990932,KIAA2012,LOC105611679,RHOBTB2,LOC101121497,CEP44,LOC105609145,LOC106990539,LOC105609818,LOC101109865,POLR2D,LOC101102375,LOC101111773,LOC105611746,CWC22,GNRH1,HNRNPK,LOC101123012,MSTN,LOC101115858,LOC101106395,LOC105607885,RIC1,PEBP4,HOXD1,POLR1E,CASP8,CCDC25,GLRA3,DLX2,RIF1,BAG1,LOC101114849,HR,LOC1…
2	99538401	99539600	32052994	207432142	Milk protein percentage QTL (57738)	GORASP2,RASEF,LOC106990930,WDR33,NPM2,XPO7,PIP5K1B,LOC101112634,NMRK1,RAB3GAP1,CCAR2,LOC106990932,KIAA2012,LOC105611679,RHOBTB2,LOC101121497,CEP44,LOC105609145,LOC106990539,LOC105609818,LOC101109865,POLR2D,LOC101102375,LOC101111773,LOC105611746,CWC22,GNRH1,HNRNPK,LOC101123012,MSTN,LOC101115858,LOC101106395,LOC105607885,RIC1,PEBP4,HOXD1,POLR1E,CASP8,CCDC25,GLRA3,DLX2,RIF1,BAG1,LOC101114849,HR,LOC1…
2	99982401	99983400	32052994	207432142	Milk protein percentage QTL (57738)	GORASP2,RASEF,LOC106990930,WDR33,NPM2,XPO7,PIP5K1B,LOC101112634,NMRK1,RAB3GAP1,CCAR2,LOC106990932,KIAA2012,LOC105611679,RHOBTB2,LOC101121497,CEP44,LOC105609145,LOC106990539,LOC105609818,LOC101109865,POLR2D,LOC101102375,LOC101111773,LOC105611746,CWC22,GNRH1,HNRNPK,LOC101123012,MSTN,LOC101115858,LOC101106395,LOC105607885,RIC1,PEBP4,HOXD1,POLR1E,CASP8,CCDC25,GLRA3,DLX2,RIF1,BAG1,LOC101114849,HR,LOC1…
2	101169501	101170900	32052994	207432142	Milk protein percentage QTL (57738)	GORASP2,RASEF,LOC106990930,WDR33,NPM2,XPO7,PIP5K1B,LOC101112634,NMRK1,RAB3GAP1,CCAR2,LOC106990932,KIAA2012,LOC105611679,RHOBTB2,LOC101121497,CEP44,LOC105609145,LOC106990539,LOC105609818,LOC101109865,POLR2D,LOC101102375,LOC101111773,LOC105611746,CWC22,GNRH1,HNRNPK,LOC101123012,MSTN,LOC101115858,LOC101106395,LOC105607885,RIC1,PEBP4,HOXD1,POLR1E,CASP8,CCDC25,GLRA3,DLX2,RIF1,BAG1,LOC101114849,HR,LOC1…
2	101430101	101431600	32052994	207432142	Milk protein percentage QTL (57738)	GORASP2,RASEF,LOC106990930,WDR33,NPM2,XPO7,PIP5K1B,LOC101112634,NMRK1,RAB3GAP1,CCAR2,LOC106990932,KIAA2012,LOC105611679,RHOBTB2,LOC101121497,CEP44,LOC105609145,LOC106990539,LOC105609818,LOC101109865,POLR2D,LOC101102375,LOC101111773,LOC105611746,CWC22,GNRH1,HNRNPK,LOC101123012,MSTN,LOC101115858,LOC101106395,LOC105607885,RIC1,PEBP4,HOXD1,POLR1E,CASP8,CCDC25,GLRA3,DLX2,RIF1,BAG1,LOC101114849,HR,LOC1…
2	101746401	101756800	32052994	207432142	Milk protein percentage QTL (57738)	GORASP2,RASEF,LOC106990930,WDR33,NPM2,XPO7,PIP5K1B,LOC101112634,NMRK1,RAB3GAP1,CCAR2,LOC106990932,KIAA2012,LOC105611679,RHOBTB2,LOC101121497,CEP44,LOC105609145,LOC106990539,LOC105609818,LOC101109865,POLR2D,LOC101102375,LOC101111773,LOC105611746,CWC22,GNRH1,HNRNPK,LOC101123012,MSTN,LOC101115858,LOC101106395,LOC105607885,RIC1,PEBP4,HOXD1,POLR1E,CASP8,CCDC25,GLRA3,DLX2,RIF1,BAG1,LOC101114849,HR,LOC1…
2	101764601	101770600	32052994	207432142	Milk protein percentage QTL (57738)	GORASP2,RASEF,LOC106990930,WDR33,NPM2,XPO7,PIP5K1B,LOC101112634,NMRK1,RAB3GAP1,CCAR2,LOC106990932,KIAA2012,LOC105611679,RHOBTB2,LOC101121497,CEP44,LOC105609145,LOC106990539,LOC105609818,LOC101109865,POLR2D,LOC101102375,LOC101111773,LOC105611746,CWC22,GNRH1,HNRNPK,LOC101123012,MSTN,LOC101115858,LOC101106395,LOC105607885,RIC1,PEBP4,HOXD1,POLR1E,CASP8,CCDC25,GLRA3,DLX2,RIF1,BAG1,LOC101114849,HR,LOC1…
2	101778401	101794900	32052994	207432142	Milk protein percentage QTL (57738)	GORASP2,RASEF,LOC106990930,WDR33,NPM2,XPO7,PIP5K1B,LOC101112634,NMRK1,RAB3GAP1,CCAR2,LOC106990932,KIAA2012,LOC105611679,RHOBTB2,LOC101121497,CEP44,LOC105609145,LOC106990539,LOC105609818,LOC101109865,POLR2D,LOC101102375,LOC101111773,LOC105611746,CWC22,GNRH1,HNRNPK,LOC101123012,MSTN,LOC101115858,LOC101106395,LOC105607885,RIC1,PEBP4,HOXD1,POLR1E,CASP8,CCDC25,GLRA3,DLX2,RIF1,BAG1,LOC101114849,HR,LOC1…
2	101806701	101818500	32052994	207432142	Milk protein percentage QTL (57738)	GORASP2,RASEF,LOC106990930,WDR33,NPM2,XPO7,PIP5K1B,LOC101112634,NMRK1,RAB3GAP1,CCAR2,LOC106990932,KIAA2012,LOC105611679,RHOBTB2,LOC101121497,CEP44,LOC105609145,LOC106990539,LOC105609818,LOC101109865,POLR2D,LOC101102375,LOC101111773,LOC105611746,CWC22,GNRH1,HNRNPK,LOC101123012,MSTN,LOC101115858,LOC101106395,LOC105607885,RIC1,PEBP4,HOXD1,POLR1E,CASP8,CCDC25,GLRA3,DLX2,RIF1,BAG1,LOC101114849,HR,LOC1…
2	101818501	101821500	32052994	207432142	Milk protein percentage QTL (57738)	GORASP2,RASEF,LOC106990930,WDR33,NPM2,XPO7,PIP5K1B,LOC101112634,NMRK1,RAB3GAP1,CCAR2,LOC106990932,KIAA2012,LOC105611679,RHOBTB2,LOC101121497,CEP44,LOC105609145,LOC106990539,LOC105609818,LOC101109865,POLR2D,LOC101102375,LOC101111773,LOC105611746,CWC22,GNRH1,HNRNPK,LOC101123012,MSTN,LOC101115858,LOC101106395,LOC105607885,RIC1,PEBP4,HOXD1,POLR1E,CASP8,CCDC25,GLRA3,DLX2,RIF1,BAG1,LOC101114849,HR,LOC1…
2	102101901	102103200	32052994	207432142	Milk protein percentage QTL (57738)	GORASP2,RASEF,LOC106990930,WDR33,NPM2,XPO7,PIP5K1B,LOC101112634,NMRK1,RAB3GAP1,CCAR2,LOC106990932,KIAA2012,LOC105611679,RHOBTB2,LOC101121497,CEP44,LOC105609145,LOC106990539,LOC105609818,LOC101109865,POLR2D,LOC101102375,LOC101111773,LOC105611746,CWC22,GNRH1,HNRNPK,LOC101123012,MSTN,LOC101115858,LOC101106395,LOC105607885,RIC1,PEBP4,HOXD1,POLR1E,CASP8,CCDC25,GLRA3,DLX2,RIF1,BAG1,LOC101114849,HR,LOC1…
2	102654101	102656200	32052994	207432142	Milk protein percentage QTL (57738)	GORASP2,RASEF,LOC106990930,WDR33,NPM2,XPO7,PIP5K1B,LOC101112634,NMRK1,RAB3GAP1,CCAR2,LOC106990932,KIAA2012,LOC105611679,RHOBTB2,LOC101121497,CEP44,LOC105609145,LOC106990539,LOC105609818,LOC101109865,POLR2D,LOC101102375,LOC101111773,LOC105611746,CWC22,GNRH1,HNRNPK,LOC101123012,MSTN,LOC101115858,LOC101106395,LOC105607885,RIC1,PEBP4,HOXD1,POLR1E,CASP8,CCDC25,GLRA3,DLX2,RIF1,BAG1,LOC101114849,HR,LOC1…
2	102656201	102659100	32052994	207432142	Milk protein percentage QTL (57738)	GORASP2,RASEF,LOC106990930,WDR33,NPM2,XPO7,PIP5K1B,LOC101112634,NMRK1,RAB3GAP1,CCAR2,LOC106990932,KIAA2012,LOC105611679,RHOBTB2,LOC101121497,CEP44,LOC105609145,LOC106990539,LOC105609818,LOC101109865,POLR2D,LOC101102375,LOC101111773,LOC105611746,CWC22,GNRH1,HNRNPK,LOC101123012,MSTN,LOC101115858,LOC101106395,LOC105607885,RIC1,PEBP4,HOXD1,POLR1E,CASP8,CCDC25,GLRA3,DLX2,RIF1,BAG1,LOC101114849,HR,LOC1…
2	102997401	102998500	32052994	207432142	Milk protein percentage QTL (57738)	GORASP2,RASEF,LOC106990930,WDR33,NPM2,XPO7,PIP5K1B,LOC101112634,NMRK1,RAB3GAP1,CCAR2,LOC106990932,KIAA2012,LOC105611679,RHOBTB2,LOC101121497,CEP44,LOC105609145,LOC106990539,LOC105609818,LOC101109865,POLR2D,LOC101102375,LOC101111773,LOC105611746,CWC22,GNRH1,HNRNPK,LOC101123012,MSTN,LOC101115858,LOC101106395,LOC105607885,RIC1,PEBP4,HOXD1,POLR1E,CASP8,CCDC25,GLRA3,DLX2,RIF1,BAG1,LOC101114849,HR,LOC1…
2	103022901	103024200	32052994	207432142	Milk protein percentage QTL (57738)	GORASP2,RASEF,LOC106990930,WDR33,NPM2,XPO7,PIP5K1B,LOC101112634,NMRK1,RAB3GAP1,CCAR2,LOC106990932,KIAA2012,LOC105611679,RHOBTB2,LOC101121497,CEP44,LOC105609145,LOC106990539,LOC105609818,LOC101109865,POLR2D,LOC101102375,LOC101111773,LOC105611746,CWC22,GNRH1,HNRNPK,LOC101123012,MSTN,LOC101115858,LOC101106395,LOC105607885,RIC1,PEBP4,HOXD1,POLR1E,CASP8,CCDC25,GLRA3,DLX2,RIF1,BAG1,LOC101114849,HR,LOC1…
2	103216001	103217200	32052994	207432142	Milk protein percentage QTL (57738)	GORASP2,RASEF,LOC106990930,WDR33,NPM2,XPO7,PIP5K1B,LOC101112634,NMRK1,RAB3GAP1,CCAR2,LOC106990932,KIAA2012,LOC105611679,RHOBTB2,LOC101121497,CEP44,LOC105609145,LOC106990539,LOC105609818,LOC101109865,POLR2D,LOC101102375,LOC101111773,LOC105611746,CWC22,GNRH1,HNRNPK,LOC101123012,MSTN,LOC101115858,LOC101106395,LOC105607885,RIC1,PEBP4,HOXD1,POLR1E,CASP8,CCDC25,GLRA3,DLX2,RIF1,BAG1,LOC101114849,HR,LOC1…
2	103329501	103331900	32052994	207432142	Milk protein percentage QTL (57738)	GORASP2,RASEF,LOC106990930,WDR33,NPM2,XPO7,PIP5K1B,LOC101112634,NMRK1,RAB3GAP1,CCAR2,LOC106990932,KIAA2012,LOC105611679,RHOBTB2,LOC101121497,CEP44,LOC105609145,LOC106990539,LOC105609818,LOC101109865,POLR2D,LOC101102375,LOC101111773,LOC105611746,CWC22,GNRH1,HNRNPK,LOC101123012,MSTN,LOC101115858,LOC101106395,LOC105607885,RIC1,PEBP4,HOXD1,POLR1E,CASP8,CCDC25,GLRA3,DLX2,RIF1,BAG1,LOC101114849,HR,LOC1…
2	103699801	103701100	32052994	207432142	Milk protein percentage QTL (57738)	GORASP2,RASEF,LOC106990930,WDR33,NPM2,XPO7,PIP5K1B,LOC101112634,NMRK1,RAB3GAP1,CCAR2,LOC106990932,KIAA2012,LOC105611679,RHOBTB2,LOC101121497,CEP44,LOC105609145,LOC106990539,LOC105609818,LOC101109865,POLR2D,LOC101102375,LOC101111773,LOC105611746,CWC22,GNRH1,HNRNPK,LOC101123012,MSTN,LOC101115858,LOC101106395,LOC105607885,RIC1,PEBP4,HOXD1,POLR1E,CASP8,CCDC25,GLRA3,DLX2,RIF1,BAG1,LOC101114849,HR,LOC1…
2	104323601	104328000	32052994	207432142	Milk protein percentage QTL (57738)	GORASP2,RASEF,LOC106990930,WDR33,NPM2,XPO7,PIP5K1B,LOC101112634,NMRK1,RAB3GAP1,CCAR2,LOC106990932,KIAA2012,LOC105611679,RHOBTB2,LOC101121497,CEP44,LOC105609145,LOC106990539,LOC105609818,LOC101109865,POLR2D,LOC101102375,LOC101111773,LOC105611746,CWC22,GNRH1,HNRNPK,LOC101123012,MSTN,LOC101115858,LOC101106395,LOC105607885,RIC1,PEBP4,HOXD1,POLR1E,CASP8,CCDC25,GLRA3,DLX2,RIF1,BAG1,LOC101114849,HR,LOC1…
2	104686401	104689100	32052994	207432142	Milk protein percentage QTL (57738)	GORASP2,RASEF,LOC106990930,WDR33,NPM2,XPO7,PIP5K1B,LOC101112634,NMRK1,RAB3GAP1,CCAR2,LOC106990932,KIAA2012,LOC105611679,RHOBTB2,LOC101121497,CEP44,LOC105609145,LOC106990539,LOC105609818,LOC101109865,POLR2D,LOC101102375,LOC101111773,LOC105611746,CWC22,GNRH1,HNRNPK,LOC101123012,MSTN,LOC101115858,LOC101106395,LOC105607885,RIC1,PEBP4,HOXD1,POLR1E,CASP8,CCDC25,GLRA3,DLX2,RIF1,BAG1,LOC101114849,HR,LOC1…
2	104786401	104787900	32052994	207432142	Milk protein percentage QTL (57738)	GORASP2,RASEF,LOC106990930,WDR33,NPM2,XPO7,PIP5K1B,LOC101112634,NMRK1,RAB3GAP1,CCAR2,LOC106990932,KIAA2012,LOC105611679,RHOBTB2,LOC101121497,CEP44,LOC105609145,LOC106990539,LOC105609818,LOC101109865,POLR2D,LOC101102375,LOC101111773,LOC105611746,CWC22,GNRH1,HNRNPK,LOC101123012,MSTN,LOC101115858,LOC101106395,LOC105607885,RIC1,PEBP4,HOXD1,POLR1E,CASP8,CCDC25,GLRA3,DLX2,RIF1,BAG1,LOC101114849,HR,LOC1…
2	105014101	105015200	32052994	207432142	Milk protein percentage QTL (57738)	GORASP2,RASEF,LOC106990930,WDR33,NPM2,XPO7,PIP5K1B,LOC101112634,NMRK1,RAB3GAP1,CCAR2,LOC106990932,KIAA2012,LOC105611679,RHOBTB2,LOC101121497,CEP44,LOC105609145,LOC106990539,LOC105609818,LOC101109865,POLR2D,LOC101102375,LOC101111773,LOC105611746,CWC22,GNRH1,HNRNPK,LOC101123012,MSTN,LOC101115858,LOC101106395,LOC105607885,RIC1,PEBP4,HOXD1,POLR1E,CASP8,CCDC25,GLRA3,DLX2,RIF1,BAG1,LOC101114849,HR,LOC1…
2	105064901	105066200	32052994	207432142	Milk protein percentage QTL (57738)	GORASP2,RASEF,LOC106990930,WDR33,NPM2,XPO7,PIP5K1B,LOC101112634,NMRK1,RAB3GAP1,CCAR2,LOC106990932,KIAA2012,LOC105611679,RHOBTB2,LOC101121497,CEP44,LOC105609145,LOC106990539,LOC105609818,LOC101109865,POLR2D,LOC101102375,LOC101111773,LOC105611746,CWC22,GNRH1,HNRNPK,LOC101123012,MSTN,LOC101115858,LOC101106395,LOC105607885,RIC1,PEBP4,HOXD1,POLR1E,CASP8,CCDC25,GLRA3,DLX2,RIF1,BAG1,LOC101114849,HR,LOC1…
2	105101101	105102600	32052994	207432142	Milk protein percentage QTL (57738)	GORASP2,RASEF,LOC106990930,WDR33,NPM2,XPO7,PIP5K1B,LOC101112634,NMRK1,RAB3GAP1,CCAR2,LOC106990932,KIAA2012,LOC105611679,RHOBTB2,LOC101121497,CEP44,LOC105609145,LOC106990539,LOC105609818,LOC101109865,POLR2D,LOC101102375,LOC101111773,LOC105611746,CWC22,GNRH1,HNRNPK,LOC101123012,MSTN,LOC101115858,LOC101106395,LOC105607885,RIC1,PEBP4,HOXD1,POLR1E,CASP8,CCDC25,GLRA3,DLX2,RIF1,BAG1,LOC101114849,HR,LOC1…
2	105145601	105146700	32052994	207432142	Milk protein percentage QTL (57738)	GORASP2,RASEF,LOC106990930,WDR33,NPM2,XPO7,PIP5K1B,LOC101112634,NMRK1,RAB3GAP1,CCAR2,LOC106990932,KIAA2012,LOC105611679,RHOBTB2,LOC101121497,CEP44,LOC105609145,LOC106990539,LOC105609818,LOC101109865,POLR2D,LOC101102375,LOC101111773,LOC105611746,CWC22,GNRH1,HNRNPK,LOC101123012,MSTN,LOC101115858,LOC101106395,LOC105607885,RIC1,PEBP4,HOXD1,POLR1E,CASP8,CCDC25,GLRA3,DLX2,RIF1,BAG1,LOC101114849,HR,LOC1…
2	105540801	105542500	32052994	207432142	Milk protein percentage QTL (57738)	GORASP2,RASEF,LOC106990930,WDR33,NPM2,XPO7,PIP5K1B,LOC101112634,NMRK1,RAB3GAP1,CCAR2,LOC106990932,KIAA2012,LOC105611679,RHOBTB2,LOC101121497,CEP44,LOC105609145,LOC106990539,LOC105609818,LOC101109865,POLR2D,LOC101102375,LOC101111773,LOC105611746,CWC22,GNRH1,HNRNPK,LOC101123012,MSTN,LOC101115858,LOC101106395,LOC105607885,RIC1,PEBP4,HOXD1,POLR1E,CASP8,CCDC25,GLRA3,DLX2,RIF1,BAG1,LOC101114849,HR,LOC1…
2	105700101	105701200	32052994	207432142	Milk protein percentage QTL (57738)	GORASP2,RASEF,LOC106990930,WDR33,NPM2,XPO7,PIP5K1B,LOC101112634,NMRK1,RAB3GAP1,CCAR2,LOC106990932,KIAA2012,LOC105611679,RHOBTB2,LOC101121497,CEP44,LOC105609145,LOC106990539,LOC105609818,LOC101109865,POLR2D,LOC101102375,LOC101111773,LOC105611746,CWC22,GNRH1,HNRNPK,LOC101123012,MSTN,LOC101115858,LOC101106395,LOC105607885,RIC1,PEBP4,HOXD1,POLR1E,CASP8,CCDC25,GLRA3,DLX2,RIF1,BAG1,LOC101114849,HR,LOC1…
2	105989401	105990400	32052994	207432142	Milk protein percentage QTL (57738)	GORASP2,RASEF,LOC106990930,WDR33,NPM2,XPO7,PIP5K1B,LOC101112634,NMRK1,RAB3GAP1,CCAR2,LOC106990932,KIAA2012,LOC105611679,RHOBTB2,LOC101121497,CEP44,LOC105609145,LOC106990539,LOC105609818,LOC101109865,POLR2D,LOC101102375,LOC101111773,LOC105611746,CWC22,GNRH1,HNRNPK,LOC101123012,MSTN,LOC101115858,LOC101106395,LOC105607885,RIC1,PEBP4,HOXD1,POLR1E,CASP8,CCDC25,GLRA3,DLX2,RIF1,BAG1,LOC101114849,HR,LOC1…
2	106442301	106443600	32052994	207432142	Milk protein percentage QTL (57738)	GORASP2,RASEF,LOC106990930,WDR33,NPM2,XPO7,PIP5K1B,LOC101112634,NMRK1,RAB3GAP1,CCAR2,LOC106990932,KIAA2012,LOC105611679,RHOBTB2,LOC101121497,CEP44,LOC105609145,LOC106990539,LOC105609818,LOC101109865,POLR2D,LOC101102375,LOC101111773,LOC105611746,CWC22,GNRH1,HNRNPK,LOC101123012,MSTN,LOC101115858,LOC101106395,LOC105607885,RIC1,PEBP4,HOXD1,POLR1E,CASP8,CCDC25,GLRA3,DLX2,RIF1,BAG1,LOC101114849,HR,LOC1…
2	106634901	106636200	32052994	207432142	Milk protein percentage QTL (57738)	GORASP2,RASEF,LOC106990930,WDR33,NPM2,XPO7,PIP5K1B,LOC101112634,NMRK1,RAB3GAP1,CCAR2,LOC106990932,KIAA2012,LOC105611679,RHOBTB2,LOC101121497,CEP44,LOC105609145,LOC106990539,LOC105609818,LOC101109865,POLR2D,LOC101102375,LOC101111773,LOC105611746,CWC22,GNRH1,HNRNPK,LOC101123012,MSTN,LOC101115858,LOC101106395,LOC105607885,RIC1,PEBP4,HOXD1,POLR1E,CASP8,CCDC25,GLRA3,DLX2,RIF1,BAG1,LOC101114849,HR,LOC1…
2	106693701	106695000	32052994	207432142	Milk protein percentage QTL (57738)	GORASP2,RASEF,LOC106990930,WDR33,NPM2,XPO7,PIP5K1B,LOC101112634,NMRK1,RAB3GAP1,CCAR2,LOC106990932,KIAA2012,LOC105611679,RHOBTB2,LOC101121497,CEP44,LOC105609145,LOC106990539,LOC105609818,LOC101109865,POLR2D,LOC101102375,LOC101111773,LOC105611746,CWC22,GNRH1,HNRNPK,LOC101123012,MSTN,LOC101115858,LOC101106395,LOC105607885,RIC1,PEBP4,HOXD1,POLR1E,CASP8,CCDC25,GLRA3,DLX2,RIF1,BAG1,LOC101114849,HR,LOC1…
2	106715201	106716300	32052994	207432142	Milk protein percentage QTL (57738)	GORASP2,RASEF,LOC106990930,WDR33,NPM2,XPO7,PIP5K1B,LOC101112634,NMRK1,RAB3GAP1,CCAR2,LOC106990932,KIAA2012,LOC105611679,RHOBTB2,LOC101121497,CEP44,LOC105609145,LOC106990539,LOC105609818,LOC101109865,POLR2D,LOC101102375,LOC101111773,LOC105611746,CWC22,GNRH1,HNRNPK,LOC101123012,MSTN,LOC101115858,LOC101106395,LOC105607885,RIC1,PEBP4,HOXD1,POLR1E,CASP8,CCDC25,GLRA3,DLX2,RIF1,BAG1,LOC101114849,HR,LOC1…
2	107291801	107292900	32052994	207432142	Milk protein percentage QTL (57738)	GORASP2,RASEF,LOC106990930,WDR33,NPM2,XPO7,PIP5K1B,LOC101112634,NMRK1,RAB3GAP1,CCAR2,LOC106990932,KIAA2012,LOC105611679,RHOBTB2,LOC101121497,CEP44,LOC105609145,LOC106990539,LOC105609818,LOC101109865,POLR2D,LOC101102375,LOC101111773,LOC105611746,CWC22,GNRH1,HNRNPK,LOC101123012,MSTN,LOC101115858,LOC101106395,LOC105607885,RIC1,PEBP4,HOXD1,POLR1E,CASP8,CCDC25,GLRA3,DLX2,RIF1,BAG1,LOC101114849,HR,LOC1…
2	107997501	107998500	32052994	207432142	Milk protein percentage QTL (57738)	GORASP2,RASEF,LOC106990930,WDR33,NPM2,XPO7,PIP5K1B,LOC101112634,NMRK1,RAB3GAP1,CCAR2,LOC106990932,KIAA2012,LOC105611679,RHOBTB2,LOC101121497,CEP44,LOC105609145,LOC106990539,LOC105609818,LOC101109865,POLR2D,LOC101102375,LOC101111773,LOC105611746,CWC22,GNRH1,HNRNPK,LOC101123012,MSTN,LOC101115858,LOC101106395,LOC105607885,RIC1,PEBP4,HOXD1,POLR1E,CASP8,CCDC25,GLRA3,DLX2,RIF1,BAG1,LOC101114849,HR,LOC1…
2	109130001	109131100	32052994	207432142	Milk protein percentage QTL (57738)	GORASP2,RASEF,LOC106990930,WDR33,NPM2,XPO7,PIP5K1B,LOC101112634,NMRK1,RAB3GAP1,CCAR2,LOC106990932,KIAA2012,LOC105611679,RHOBTB2,LOC101121497,CEP44,LOC105609145,LOC106990539,LOC105609818,LOC101109865,POLR2D,LOC101102375,LOC101111773,LOC105611746,CWC22,GNRH1,HNRNPK,LOC101123012,MSTN,LOC101115858,LOC101106395,LOC105607885,RIC1,PEBP4,HOXD1,POLR1E,CASP8,CCDC25,GLRA3,DLX2,RIF1,BAG1,LOC101114849,HR,LOC1…
2	109852401	109853400	32052994	207432142	Milk protein percentage QTL (57738)	GORASP2,RASEF,LOC106990930,WDR33,NPM2,XPO7,PIP5K1B,LOC101112634,NMRK1,RAB3GAP1,CCAR2,LOC106990932,KIAA2012,LOC105611679,RHOBTB2,LOC101121497,CEP44,LOC105609145,LOC106990539,LOC105609818,LOC101109865,POLR2D,LOC101102375,LOC101111773,LOC105611746,CWC22,GNRH1,HNRNPK,LOC101123012,MSTN,LOC101115858,LOC101106395,LOC105607885,RIC1,PEBP4,HOXD1,POLR1E,CASP8,CCDC25,GLRA3,DLX2,RIF1,BAG1,LOC101114849,HR,LOC1…
2	109931201	109932200	32052994	207432142	Milk protein percentage QTL (57738)	GORASP2,RASEF,LOC106990930,WDR33,NPM2,XPO7,PIP5K1B,LOC101112634,NMRK1,RAB3GAP1,CCAR2,LOC106990932,KIAA2012,LOC105611679,RHOBTB2,LOC101121497,CEP44,LOC105609145,LOC106990539,LOC105609818,LOC101109865,POLR2D,LOC101102375,LOC101111773,LOC105611746,CWC22,GNRH1,HNRNPK,LOC101123012,MSTN,LOC101115858,LOC101106395,LOC105607885,RIC1,PEBP4,HOXD1,POLR1E,CASP8,CCDC25,GLRA3,DLX2,RIF1,BAG1,LOC101114849,HR,LOC1…
2	110064201	110065300	32052994	207432142	Milk protein percentage QTL (57738)	GORASP2,RASEF,LOC106990930,WDR33,NPM2,XPO7,PIP5K1B,LOC101112634,NMRK1,RAB3GAP1,CCAR2,LOC106990932,KIAA2012,LOC105611679,RHOBTB2,LOC101121497,CEP44,LOC105609145,LOC106990539,LOC105609818,LOC101109865,POLR2D,LOC101102375,LOC101111773,LOC105611746,CWC22,GNRH1,HNRNPK,LOC101123012,MSTN,LOC101115858,LOC101106395,LOC105607885,RIC1,PEBP4,HOXD1,POLR1E,CASP8,CCDC25,GLRA3,DLX2,RIF1,BAG1,LOC101114849,HR,LOC1…
2	110224201	110225300	32052994	207432142	Milk protein percentage QTL (57738)	GORASP2,RASEF,LOC106990930,WDR33,NPM2,XPO7,PIP5K1B,LOC101112634,NMRK1,RAB3GAP1,CCAR2,LOC106990932,KIAA2012,LOC105611679,RHOBTB2,LOC101121497,CEP44,LOC105609145,LOC106990539,LOC105609818,LOC101109865,POLR2D,LOC101102375,LOC101111773,LOC105611746,CWC22,GNRH1,HNRNPK,LOC101123012,MSTN,LOC101115858,LOC101106395,LOC105607885,RIC1,PEBP4,HOXD1,POLR1E,CASP8,CCDC25,GLRA3,DLX2,RIF1,BAG1,LOC101114849,HR,LOC1…
2	110295801	110297000	32052994	207432142	Milk protein percentage QTL (57738)	GORASP2,RASEF,LOC106990930,WDR33,NPM2,XPO7,PIP5K1B,LOC101112634,NMRK1,RAB3GAP1,CCAR2,LOC106990932,KIAA2012,LOC105611679,RHOBTB2,LOC101121497,CEP44,LOC105609145,LOC106990539,LOC105609818,LOC101109865,POLR2D,LOC101102375,LOC101111773,LOC105611746,CWC22,GNRH1,HNRNPK,LOC101123012,MSTN,LOC101115858,LOC101106395,LOC105607885,RIC1,PEBP4,HOXD1,POLR1E,CASP8,CCDC25,GLRA3,DLX2,RIF1,BAG1,LOC101114849,HR,LOC1…
2	110357101	110358100	32052994	207432142	Milk protein percentage QTL (57738)	GORASP2,RASEF,LOC106990930,WDR33,NPM2,XPO7,PIP5K1B,LOC101112634,NMRK1,RAB3GAP1,CCAR2,LOC106990932,KIAA2012,LOC105611679,RHOBTB2,LOC101121497,CEP44,LOC105609145,LOC106990539,LOC105609818,LOC101109865,POLR2D,LOC101102375,LOC101111773,LOC105611746,CWC22,GNRH1,HNRNPK,LOC101123012,MSTN,LOC101115858,LOC101106395,LOC105607885,RIC1,PEBP4,HOXD1,POLR1E,CASP8,CCDC25,GLRA3,DLX2,RIF1,BAG1,LOC101114849,HR,LOC1…
2	110748201	110753300	32052994	207432142	Milk protein percentage QTL (57738)	GORASP2,RASEF,LOC106990930,WDR33,NPM2,XPO7,PIP5K1B,LOC101112634,NMRK1,RAB3GAP1,CCAR2,LOC106990932,KIAA2012,LOC105611679,RHOBTB2,LOC101121497,CEP44,LOC105609145,LOC106990539,LOC105609818,LOC101109865,POLR2D,LOC101102375,LOC101111773,LOC105611746,CWC22,GNRH1,HNRNPK,LOC101123012,MSTN,LOC101115858,LOC101106395,LOC105607885,RIC1,PEBP4,HOXD1,POLR1E,CASP8,CCDC25,GLRA3,DLX2,RIF1,BAG1,LOC101114849,HR,LOC1…
2	110800501	110802000	32052994	207432142	Milk protein percentage QTL (57738)	GORASP2,RASEF,LOC106990930,WDR33,NPM2,XPO7,PIP5K1B,LOC101112634,NMRK1,RAB3GAP1,CCAR2,LOC106990932,KIAA2012,LOC105611679,RHOBTB2,LOC101121497,CEP44,LOC105609145,LOC106990539,LOC105609818,LOC101109865,POLR2D,LOC101102375,LOC101111773,LOC105611746,CWC22,GNRH1,HNRNPK,LOC101123012,MSTN,LOC101115858,LOC101106395,LOC105607885,RIC1,PEBP4,HOXD1,POLR1E,CASP8,CCDC25,GLRA3,DLX2,RIF1,BAG1,LOC101114849,HR,LOC1…
2	110901001	110902500	32052994	207432142	Milk protein percentage QTL (57738)	GORASP2,RASEF,LOC106990930,WDR33,NPM2,XPO7,PIP5K1B,LOC101112634,NMRK1,RAB3GAP1,CCAR2,LOC106990932,KIAA2012,LOC105611679,RHOBTB2,LOC101121497,CEP44,LOC105609145,LOC106990539,LOC105609818,LOC101109865,POLR2D,LOC101102375,LOC101111773,LOC105611746,CWC22,GNRH1,HNRNPK,LOC101123012,MSTN,LOC101115858,LOC101106395,LOC105607885,RIC1,PEBP4,HOXD1,POLR1E,CASP8,CCDC25,GLRA3,DLX2,RIF1,BAG1,LOC101114849,HR,LOC1…
2	111026601	111027600	32052994	207432142	Milk protein percentage QTL (57738)	GORASP2,RASEF,LOC106990930,WDR33,NPM2,XPO7,PIP5K1B,LOC101112634,NMRK1,RAB3GAP1,CCAR2,LOC106990932,KIAA2012,LOC105611679,RHOBTB2,LOC101121497,CEP44,LOC105609145,LOC106990539,LOC105609818,LOC101109865,POLR2D,LOC101102375,LOC101111773,LOC105611746,CWC22,GNRH1,HNRNPK,LOC101123012,MSTN,LOC101115858,LOC101106395,LOC105607885,RIC1,PEBP4,HOXD1,POLR1E,CASP8,CCDC25,GLRA3,DLX2,RIF1,BAG1,LOC101114849,HR,LOC1…
2	111035301	111036900	32052994	207432142	Milk protein percentage QTL (57738)	GORASP2,RASEF,LOC106990930,WDR33,NPM2,XPO7,PIP5K1B,LOC101112634,NMRK1,RAB3GAP1,CCAR2,LOC106990932,KIAA2012,LOC105611679,RHOBTB2,LOC101121497,CEP44,LOC105609145,LOC106990539,LOC105609818,LOC101109865,POLR2D,LOC101102375,LOC101111773,LOC105611746,CWC22,GNRH1,HNRNPK,LOC101123012,MSTN,LOC101115858,LOC101106395,LOC105607885,RIC1,PEBP4,HOXD1,POLR1E,CASP8,CCDC25,GLRA3,DLX2,RIF1,BAG1,LOC101114849,HR,LOC1…
2	111203101	111204400	32052994	207432142	Milk protein percentage QTL (57738)	GORASP2,RASEF,LOC106990930,WDR33,NPM2,XPO7,PIP5K1B,LOC101112634,NMRK1,RAB3GAP1,CCAR2,LOC106990932,KIAA2012,LOC105611679,RHOBTB2,LOC101121497,CEP44,LOC105609145,LOC106990539,LOC105609818,LOC101109865,POLR2D,LOC101102375,LOC101111773,LOC105611746,CWC22,GNRH1,HNRNPK,LOC101123012,MSTN,LOC101115858,LOC101106395,LOC105607885,RIC1,PEBP4,HOXD1,POLR1E,CASP8,CCDC25,GLRA3,DLX2,RIF1,BAG1,LOC101114849,HR,LOC1…
2	111314001	111315700	32052994	207432142	Milk protein percentage QTL (57738)	GORASP2,RASEF,LOC106990930,WDR33,NPM2,XPO7,PIP5K1B,LOC101112634,NMRK1,RAB3GAP1,CCAR2,LOC106990932,KIAA2012,LOC105611679,RHOBTB2,LOC101121497,CEP44,LOC105609145,LOC106990539,LOC105609818,LOC101109865,POLR2D,LOC101102375,LOC101111773,LOC105611746,CWC22,GNRH1,HNRNPK,LOC101123012,MSTN,LOC101115858,LOC101106395,LOC105607885,RIC1,PEBP4,HOXD1,POLR1E,CASP8,CCDC25,GLRA3,DLX2,RIF1,BAG1,LOC101114849,HR,LOC1…
2	111567301	111568700	32052994	207432142	Milk protein percentage QTL (57738)	GORASP2,RASEF,LOC106990930,WDR33,NPM2,XPO7,PIP5K1B,LOC101112634,NMRK1,RAB3GAP1,CCAR2,LOC106990932,KIAA2012,LOC105611679,RHOBTB2,LOC101121497,CEP44,LOC105609145,LOC106990539,LOC105609818,LOC101109865,POLR2D,LOC101102375,LOC101111773,LOC105611746,CWC22,GNRH1,HNRNPK,LOC101123012,MSTN,LOC101115858,LOC101106395,LOC105607885,RIC1,PEBP4,HOXD1,POLR1E,CASP8,CCDC25,GLRA3,DLX2,RIF1,BAG1,LOC101114849,HR,LOC1…
2	111682701	111684600	32052994	207432142	Milk protein percentage QTL (57738)	GORASP2,RASEF,LOC106990930,WDR33,NPM2,XPO7,PIP5K1B,LOC101112634,NMRK1,RAB3GAP1,CCAR2,LOC106990932,KIAA2012,LOC105611679,RHOBTB2,LOC101121497,CEP44,LOC105609145,LOC106990539,LOC105609818,LOC101109865,POLR2D,LOC101102375,LOC101111773,LOC105611746,CWC22,GNRH1,HNRNPK,LOC101123012,MSTN,LOC101115858,LOC101106395,LOC105607885,RIC1,PEBP4,HOXD1,POLR1E,CASP8,CCDC25,GLRA3,DLX2,RIF1,BAG1,LOC101114849,HR,LOC1…
2	111779201	111784200	32052994	207432142	Milk protein percentage QTL (57738)	GORASP2,RASEF,LOC106990930,WDR33,NPM2,XPO7,PIP5K1B,LOC101112634,NMRK1,RAB3GAP1,CCAR2,LOC106990932,KIAA2012,LOC105611679,RHOBTB2,LOC101121497,CEP44,LOC105609145,LOC106990539,LOC105609818,LOC101109865,POLR2D,LOC101102375,LOC101111773,LOC105611746,CWC22,GNRH1,HNRNPK,LOC101123012,MSTN,LOC101115858,LOC101106395,LOC105607885,RIC1,PEBP4,HOXD1,POLR1E,CASP8,CCDC25,GLRA3,DLX2,RIF1,BAG1,LOC101114849,HR,LOC1…
2	111784301	111794400	32052994	207432142	Milk protein percentage QTL (57738)	GORASP2,RASEF,LOC106990930,WDR33,NPM2,XPO7,PIP5K1B,LOC101112634,NMRK1,RAB3GAP1,CCAR2,LOC106990932,KIAA2012,LOC105611679,RHOBTB2,LOC101121497,CEP44,LOC105609145,LOC106990539,LOC105609818,LOC101109865,POLR2D,LOC101102375,LOC101111773,LOC105611746,CWC22,GNRH1,HNRNPK,LOC101123012,MSTN,LOC101115858,LOC101106395,LOC105607885,RIC1,PEBP4,HOXD1,POLR1E,CASP8,CCDC25,GLRA3,DLX2,RIF1,BAG1,LOC101114849,HR,LOC1…
2	111794501	111802200	32052994	207432142	Milk protein percentage QTL (57738)	GORASP2,RASEF,LOC106990930,WDR33,NPM2,XPO7,PIP5K1B,LOC101112634,NMRK1,RAB3GAP1,CCAR2,LOC106990932,KIAA2012,LOC105611679,RHOBTB2,LOC101121497,CEP44,LOC105609145,LOC106990539,LOC105609818,LOC101109865,POLR2D,LOC101102375,LOC101111773,LOC105611746,CWC22,GNRH1,HNRNPK,LOC101123012,MSTN,LOC101115858,LOC101106395,LOC105607885,RIC1,PEBP4,HOXD1,POLR1E,CASP8,CCDC25,GLRA3,DLX2,RIF1,BAG1,LOC101114849,HR,LOC1…
2	112129201	112130700	32052994	207432142	Milk protein percentage QTL (57738)	GORASP2,RASEF,LOC106990930,WDR33,NPM2,XPO7,PIP5K1B,LOC101112634,NMRK1,RAB3GAP1,CCAR2,LOC106990932,KIAA2012,LOC105611679,RHOBTB2,LOC101121497,CEP44,LOC105609145,LOC106990539,LOC105609818,LOC101109865,POLR2D,LOC101102375,LOC101111773,LOC105611746,CWC22,GNRH1,HNRNPK,LOC101123012,MSTN,LOC101115858,LOC101106395,LOC105607885,RIC1,PEBP4,HOXD1,POLR1E,CASP8,CCDC25,GLRA3,DLX2,RIF1,BAG1,LOC101114849,HR,LOC1…
2	112398801	112406700	32052994	207432142	Milk protein percentage QTL (57738)	GORASP2,RASEF,LOC106990930,WDR33,NPM2,XPO7,PIP5K1B,LOC101112634,NMRK1,RAB3GAP1,CCAR2,LOC106990932,KIAA2012,LOC105611679,RHOBTB2,LOC101121497,CEP44,LOC105609145,LOC106990539,LOC105609818,LOC101109865,POLR2D,LOC101102375,LOC101111773,LOC105611746,CWC22,GNRH1,HNRNPK,LOC101123012,MSTN,LOC101115858,LOC101106395,LOC105607885,RIC1,PEBP4,HOXD1,POLR1E,CASP8,CCDC25,GLRA3,DLX2,RIF1,BAG1,LOC101114849,HR,LOC1…
2	114007601	114011500	32052994	207432142	Milk protein percentage QTL (57738)	GORASP2,RASEF,LOC106990930,WDR33,NPM2,XPO7,PIP5K1B,LOC101112634,NMRK1,RAB3GAP1,CCAR2,LOC106990932,KIAA2012,LOC105611679,RHOBTB2,LOC101121497,CEP44,LOC105609145,LOC106990539,LOC105609818,LOC101109865,POLR2D,LOC101102375,LOC101111773,LOC105611746,CWC22,GNRH1,HNRNPK,LOC101123012,MSTN,LOC101115858,LOC101106395,LOC105607885,RIC1,PEBP4,HOXD1,POLR1E,CASP8,CCDC25,GLRA3,DLX2,RIF1,BAG1,LOC101114849,HR,LOC1…
2	114125901	114127200	32052994	207432142	Milk protein percentage QTL (57738)	GORASP2,RASEF,LOC106990930,WDR33,NPM2,XPO7,PIP5K1B,LOC101112634,NMRK1,RAB3GAP1,CCAR2,LOC106990932,KIAA2012,LOC105611679,RHOBTB2,LOC101121497,CEP44,LOC105609145,LOC106990539,LOC105609818,LOC101109865,POLR2D,LOC101102375,LOC101111773,LOC105611746,CWC22,GNRH1,HNRNPK,LOC101123012,MSTN,LOC101115858,LOC101106395,LOC105607885,RIC1,PEBP4,HOXD1,POLR1E,CASP8,CCDC25,GLRA3,DLX2,RIF1,BAG1,LOC101114849,HR,LOC1…
2	114387701	114388900	32052994	207432142	Milk protein percentage QTL (57738)	GORASP2,RASEF,LOC106990930,WDR33,NPM2,XPO7,PIP5K1B,LOC101112634,NMRK1,RAB3GAP1,CCAR2,LOC106990932,KIAA2012,LOC105611679,RHOBTB2,LOC101121497,CEP44,LOC105609145,LOC106990539,LOC105609818,LOC101109865,POLR2D,LOC101102375,LOC101111773,LOC105611746,CWC22,GNRH1,HNRNPK,LOC101123012,MSTN,LOC101115858,LOC101106395,LOC105607885,RIC1,PEBP4,HOXD1,POLR1E,CASP8,CCDC25,GLRA3,DLX2,RIF1,BAG1,LOC101114849,HR,LOC1…
2	114479101	114480200	32052994	207432142	Milk protein percentage QTL (57738)	GORASP2,RASEF,LOC106990930,WDR33,NPM2,XPO7,PIP5K1B,LOC101112634,NMRK1,RAB3GAP1,CCAR2,LOC106990932,KIAA2012,LOC105611679,RHOBTB2,LOC101121497,CEP44,LOC105609145,LOC106990539,LOC105609818,LOC101109865,POLR2D,LOC101102375,LOC101111773,LOC105611746,CWC22,GNRH1,HNRNPK,LOC101123012,MSTN,LOC101115858,LOC101106395,LOC105607885,RIC1,PEBP4,HOXD1,POLR1E,CASP8,CCDC25,GLRA3,DLX2,RIF1,BAG1,LOC101114849,HR,LOC1…
2	114826101	114828600	32052994	207432142	Milk protein percentage QTL (57738)	GORASP2,RASEF,LOC106990930,WDR33,NPM2,XPO7,PIP5K1B,LOC101112634,NMRK1,RAB3GAP1,CCAR2,LOC106990932,KIAA2012,LOC105611679,RHOBTB2,LOC101121497,CEP44,LOC105609145,LOC106990539,LOC105609818,LOC101109865,POLR2D,LOC101102375,LOC101111773,LOC105611746,CWC22,GNRH1,HNRNPK,LOC101123012,MSTN,LOC101115858,LOC101106395,LOC105607885,RIC1,PEBP4,HOXD1,POLR1E,CASP8,CCDC25,GLRA3,DLX2,RIF1,BAG1,LOC101114849,HR,LOC1…
2	114852901	114854100	32052994	207432142	Milk protein percentage QTL (57738)	GORASP2,RASEF,LOC106990930,WDR33,NPM2,XPO7,PIP5K1B,LOC101112634,NMRK1,RAB3GAP1,CCAR2,LOC106990932,KIAA2012,LOC105611679,RHOBTB2,LOC101121497,CEP44,LOC105609145,LOC106990539,LOC105609818,LOC101109865,POLR2D,LOC101102375,LOC101111773,LOC105611746,CWC22,GNRH1,HNRNPK,LOC101123012,MSTN,LOC101115858,LOC101106395,LOC105607885,RIC1,PEBP4,HOXD1,POLR1E,CASP8,CCDC25,GLRA3,DLX2,RIF1,BAG1,LOC101114849,HR,LOC1…
2	115180401	115181400	32052994	207432142	Milk protein percentage QTL (57738)	GORASP2,RASEF,LOC106990930,WDR33,NPM2,XPO7,PIP5K1B,LOC101112634,NMRK1,RAB3GAP1,CCAR2,LOC106990932,KIAA2012,LOC105611679,RHOBTB2,LOC101121497,CEP44,LOC105609145,LOC106990539,LOC105609818,LOC101109865,POLR2D,LOC101102375,LOC101111773,LOC105611746,CWC22,GNRH1,HNRNPK,LOC101123012,MSTN,LOC101115858,LOC101106395,LOC105607885,RIC1,PEBP4,HOXD1,POLR1E,CASP8,CCDC25,GLRA3,DLX2,RIF1,BAG1,LOC101114849,HR,LOC1…
2	115315501	115328000	32052994	207432142	Milk protein percentage QTL (57738)	GORASP2,RASEF,LOC106990930,WDR33,NPM2,XPO7,PIP5K1B,LOC101112634,NMRK1,RAB3GAP1,CCAR2,LOC106990932,KIAA2012,LOC105611679,RHOBTB2,LOC101121497,CEP44,LOC105609145,LOC106990539,LOC105609818,LOC101109865,POLR2D,LOC101102375,LOC101111773,LOC105611746,CWC22,GNRH1,HNRNPK,LOC101123012,MSTN,LOC101115858,LOC101106395,LOC105607885,RIC1,PEBP4,HOXD1,POLR1E,CASP8,CCDC25,GLRA3,DLX2,RIF1,BAG1,LOC101114849,HR,LOC1…
2	116711801	116712900	32052994	207432142	Milk protein percentage QTL (57738)	GORASP2,RASEF,LOC106990930,WDR33,NPM2,XPO7,PIP5K1B,LOC101112634,NMRK1,RAB3GAP1,CCAR2,LOC106990932,KIAA2012,LOC105611679,RHOBTB2,LOC101121497,CEP44,LOC105609145,LOC106990539,LOC105609818,LOC101109865,POLR2D,LOC101102375,LOC101111773,LOC105611746,CWC22,GNRH1,HNRNPK,LOC101123012,MSTN,LOC101115858,LOC101106395,LOC105607885,RIC1,PEBP4,HOXD1,POLR1E,CASP8,CCDC25,GLRA3,DLX2,RIF1,BAG1,LOC101114849,HR,LOC1…
2	117465901	117466900	32052994	207432142	Milk protein percentage QTL (57738)	GORASP2,RASEF,LOC106990930,WDR33,NPM2,XPO7,PIP5K1B,LOC101112634,NMRK1,RAB3GAP1,CCAR2,LOC106990932,KIAA2012,LOC105611679,RHOBTB2,LOC101121497,CEP44,LOC105609145,LOC106990539,LOC105609818,LOC101109865,POLR2D,LOC101102375,LOC101111773,LOC105611746,CWC22,GNRH1,HNRNPK,LOC101123012,MSTN,LOC101115858,LOC101106395,LOC105607885,RIC1,PEBP4,HOXD1,POLR1E,CASP8,CCDC25,GLRA3,DLX2,RIF1,BAG1,LOC101114849,HR,LOC1…
2	117474901	117476600	32052994	207432142	Milk protein percentage QTL (57738)	GORASP2,RASEF,LOC106990930,WDR33,NPM2,XPO7,PIP5K1B,LOC101112634,NMRK1,RAB3GAP1,CCAR2,LOC106990932,KIAA2012,LOC105611679,RHOBTB2,LOC101121497,CEP44,LOC105609145,LOC106990539,LOC105609818,LOC101109865,POLR2D,LOC101102375,LOC101111773,LOC105611746,CWC22,GNRH1,HNRNPK,LOC101123012,MSTN,LOC101115858,LOC101106395,LOC105607885,RIC1,PEBP4,HOXD1,POLR1E,CASP8,CCDC25,GLRA3,DLX2,RIF1,BAG1,LOC101114849,HR,LOC1…
2	117553501	117554600	32052994	207432142	Milk protein percentage QTL (57738)	GORASP2,RASEF,LOC106990930,WDR33,NPM2,XPO7,PIP5K1B,LOC101112634,NMRK1,RAB3GAP1,CCAR2,LOC106990932,KIAA2012,LOC105611679,RHOBTB2,LOC101121497,CEP44,LOC105609145,LOC106990539,LOC105609818,LOC101109865,POLR2D,LOC101102375,LOC101111773,LOC105611746,CWC22,GNRH1,HNRNPK,LOC101123012,MSTN,LOC101115858,LOC101106395,LOC105607885,RIC1,PEBP4,HOXD1,POLR1E,CASP8,CCDC25,GLRA3,DLX2,RIF1,BAG1,LOC101114849,HR,LOC1…
2	118557801	118559200	32052994	207432142	Milk protein percentage QTL (57738)	GORASP2,RASEF,LOC106990930,WDR33,NPM2,XPO7,PIP5K1B,LOC101112634,NMRK1,RAB3GAP1,CCAR2,LOC106990932,KIAA2012,LOC105611679,RHOBTB2,LOC101121497,CEP44,LOC105609145,LOC106990539,LOC105609818,LOC101109865,POLR2D,LOC101102375,LOC101111773,LOC105611746,CWC22,GNRH1,HNRNPK,LOC101123012,MSTN,LOC101115858,LOC101106395,LOC105607885,RIC1,PEBP4,HOXD1,POLR1E,CASP8,CCDC25,GLRA3,DLX2,RIF1,BAG1,LOC101114849,HR,LOC1…
2	118584601	118585700	32052994	207432142	Milk protein percentage QTL (57738)	GORASP2,RASEF,LOC106990930,WDR33,NPM2,XPO7,PIP5K1B,LOC101112634,NMRK1,RAB3GAP1,CCAR2,LOC106990932,KIAA2012,LOC105611679,RHOBTB2,LOC101121497,CEP44,LOC105609145,LOC106990539,LOC105609818,LOC101109865,POLR2D,LOC101102375,LOC101111773,LOC105611746,CWC22,GNRH1,HNRNPK,LOC101123012,MSTN,LOC101115858,LOC101106395,LOC105607885,RIC1,PEBP4,HOXD1,POLR1E,CASP8,CCDC25,GLRA3,DLX2,RIF1,BAG1,LOC101114849,HR,LOC1…
2	119393901	119394900	32052994	207432142	Milk protein percentage QTL (57738)	GORASP2,RASEF,LOC106990930,WDR33,NPM2,XPO7,PIP5K1B,LOC101112634,NMRK1,RAB3GAP1,CCAR2,LOC106990932,KIAA2012,LOC105611679,RHOBTB2,LOC101121497,CEP44,LOC105609145,LOC106990539,LOC105609818,LOC101109865,POLR2D,LOC101102375,LOC101111773,LOC105611746,CWC22,GNRH1,HNRNPK,LOC101123012,MSTN,LOC101115858,LOC101106395,LOC105607885,RIC1,PEBP4,HOXD1,POLR1E,CASP8,CCDC25,GLRA3,DLX2,RIF1,BAG1,LOC101114849,HR,LOC1…
2	119814801	119817800	32052994	207432142	Milk protein percentage QTL (57738)	GORASP2,RASEF,LOC106990930,WDR33,NPM2,XPO7,PIP5K1B,LOC101112634,NMRK1,RAB3GAP1,CCAR2,LOC106990932,KIAA2012,LOC105611679,RHOBTB2,LOC101121497,CEP44,LOC105609145,LOC106990539,LOC105609818,LOC101109865,POLR2D,LOC101102375,LOC101111773,LOC105611746,CWC22,GNRH1,HNRNPK,LOC101123012,MSTN,LOC101115858,LOC101106395,LOC105607885,RIC1,PEBP4,HOXD1,POLR1E,CASP8,CCDC25,GLRA3,DLX2,RIF1,BAG1,LOC101114849,HR,LOC1…
2	119836601	119837700	32052994	207432142	Milk protein percentage QTL (57738)	GORASP2,RASEF,LOC106990930,WDR33,NPM2,XPO7,PIP5K1B,LOC101112634,NMRK1,RAB3GAP1,CCAR2,LOC106990932,KIAA2012,LOC105611679,RHOBTB2,LOC101121497,CEP44,LOC105609145,LOC106990539,LOC105609818,LOC101109865,POLR2D,LOC101102375,LOC101111773,LOC105611746,CWC22,GNRH1,HNRNPK,LOC101123012,MSTN,LOC101115858,LOC101106395,LOC105607885,RIC1,PEBP4,HOXD1,POLR1E,CASP8,CCDC25,GLRA3,DLX2,RIF1,BAG1,LOC101114849,HR,LOC1…
2	120170501	120174100	32052994	207432142	Milk protein percentage QTL (57738)	GORASP2,RASEF,LOC106990930,WDR33,NPM2,XPO7,PIP5K1B,LOC101112634,NMRK1,RAB3GAP1,CCAR2,LOC106990932,KIAA2012,LOC105611679,RHOBTB2,LOC101121497,CEP44,LOC105609145,LOC106990539,LOC105609818,LOC101109865,POLR2D,LOC101102375,LOC101111773,LOC105611746,CWC22,GNRH1,HNRNPK,LOC101123012,MSTN,LOC101115858,LOC101106395,LOC105607885,RIC1,PEBP4,HOXD1,POLR1E,CASP8,CCDC25,GLRA3,DLX2,RIF1,BAG1,LOC101114849,HR,LOC1…
2	120724901	120726200	32052994	207432142	Milk protein percentage QTL (57738)	GORASP2,RASEF,LOC106990930,WDR33,NPM2,XPO7,PIP5K1B,LOC101112634,NMRK1,RAB3GAP1,CCAR2,LOC106990932,KIAA2012,LOC105611679,RHOBTB2,LOC101121497,CEP44,LOC105609145,LOC106990539,LOC105609818,LOC101109865,POLR2D,LOC101102375,LOC101111773,LOC105611746,CWC22,GNRH1,HNRNPK,LOC101123012,MSTN,LOC101115858,LOC101106395,LOC105607885,RIC1,PEBP4,HOXD1,POLR1E,CASP8,CCDC25,GLRA3,DLX2,RIF1,BAG1,LOC101114849,HR,LOC1…
2	121057201	121058200	32052994	207432142	Milk protein percentage QTL (57738)	GORASP2,RASEF,LOC106990930,WDR33,NPM2,XPO7,PIP5K1B,LOC101112634,NMRK1,RAB3GAP1,CCAR2,LOC106990932,KIAA2012,LOC105611679,RHOBTB2,LOC101121497,CEP44,LOC105609145,LOC106990539,LOC105609818,LOC101109865,POLR2D,LOC101102375,LOC101111773,LOC105611746,CWC22,GNRH1,HNRNPK,LOC101123012,MSTN,LOC101115858,LOC101106395,LOC105607885,RIC1,PEBP4,HOXD1,POLR1E,CASP8,CCDC25,GLRA3,DLX2,RIF1,BAG1,LOC101114849,HR,LOC1…
2	121978201	121981400	32052994	207432142	Milk protein percentage QTL (57738)	GORASP2,RASEF,LOC106990930,WDR33,NPM2,XPO7,PIP5K1B,LOC101112634,NMRK1,RAB3GAP1,CCAR2,LOC106990932,KIAA2012,LOC105611679,RHOBTB2,LOC101121497,CEP44,LOC105609145,LOC106990539,LOC105609818,LOC101109865,POLR2D,LOC101102375,LOC101111773,LOC105611746,CWC22,GNRH1,HNRNPK,LOC101123012,MSTN,LOC101115858,LOC101106395,LOC105607885,RIC1,PEBP4,HOXD1,POLR1E,CASP8,CCDC25,GLRA3,DLX2,RIF1,BAG1,LOC101114849,HR,LOC1…
2	123578801	123580300	32052994	207432142	Milk protein percentage QTL (57738)	GORASP2,RASEF,LOC106990930,WDR33,NPM2,XPO7,PIP5K1B,LOC101112634,NMRK1,RAB3GAP1,CCAR2,LOC106990932,KIAA2012,LOC105611679,RHOBTB2,LOC101121497,CEP44,LOC105609145,LOC106990539,LOC105609818,LOC101109865,POLR2D,LOC101102375,LOC101111773,LOC105611746,CWC22,GNRH1,HNRNPK,LOC101123012,MSTN,LOC101115858,LOC101106395,LOC105607885,RIC1,PEBP4,HOXD1,POLR1E,CASP8,CCDC25,GLRA3,DLX2,RIF1,BAG1,LOC101114849,HR,LOC1…
2	124204001	124205400	32052994	207432142	Milk protein percentage QTL (57738)	GORASP2,RASEF,LOC106990930,WDR33,NPM2,XPO7,PIP5K1B,LOC101112634,NMRK1,RAB3GAP1,CCAR2,LOC106990932,KIAA2012,LOC105611679,RHOBTB2,LOC101121497,CEP44,LOC105609145,LOC106990539,LOC105609818,LOC101109865,POLR2D,LOC101102375,LOC101111773,LOC105611746,CWC22,GNRH1,HNRNPK,LOC101123012,MSTN,LOC101115858,LOC101106395,LOC105607885,RIC1,PEBP4,HOXD1,POLR1E,CASP8,CCDC25,GLRA3,DLX2,RIF1,BAG1,LOC101114849,HR,LOC1…
2	125424201	125431700	32052994	207432142	Milk protein percentage QTL (57738)	GORASP2,RASEF,LOC106990930,WDR33,NPM2,XPO7,PIP5K1B,LOC101112634,NMRK1,RAB3GAP1,CCAR2,LOC106990932,KIAA2012,LOC105611679,RHOBTB2,LOC101121497,CEP44,LOC105609145,LOC106990539,LOC105609818,LOC101109865,POLR2D,LOC101102375,LOC101111773,LOC105611746,CWC22,GNRH1,HNRNPK,LOC101123012,MSTN,LOC101115858,LOC101106395,LOC105607885,RIC1,PEBP4,HOXD1,POLR1E,CASP8,CCDC25,GLRA3,DLX2,RIF1,BAG1,LOC101114849,HR,LOC1…
2	125547901	125549700	32052994	207432142	Milk protein percentage QTL (57738)	GORASP2,RASEF,LOC106990930,WDR33,NPM2,XPO7,PIP5K1B,LOC101112634,NMRK1,RAB3GAP1,CCAR2,LOC106990932,KIAA2012,LOC105611679,RHOBTB2,LOC101121497,CEP44,LOC105609145,LOC106990539,LOC105609818,LOC101109865,POLR2D,LOC101102375,LOC101111773,LOC105611746,CWC22,GNRH1,HNRNPK,LOC101123012,MSTN,LOC101115858,LOC101106395,LOC105607885,RIC1,PEBP4,HOXD1,POLR1E,CASP8,CCDC25,GLRA3,DLX2,RIF1,BAG1,LOC101114849,HR,LOC1…
2	125853101	125855700	32052994	207432142	Milk protein percentage QTL (57738)	GORASP2,RASEF,LOC106990930,WDR33,NPM2,XPO7,PIP5K1B,LOC101112634,NMRK1,RAB3GAP1,CCAR2,LOC106990932,KIAA2012,LOC105611679,RHOBTB2,LOC101121497,CEP44,LOC105609145,LOC106990539,LOC105609818,LOC101109865,POLR2D,LOC101102375,LOC101111773,LOC105611746,CWC22,GNRH1,HNRNPK,LOC101123012,MSTN,LOC101115858,LOC101106395,LOC105607885,RIC1,PEBP4,HOXD1,POLR1E,CASP8,CCDC25,GLRA3,DLX2,RIF1,BAG1,LOC101114849,HR,LOC1…
2	126473201	126474200	32052994	207432142	Milk protein percentage QTL (57738)	GORASP2,RASEF,LOC106990930,WDR33,NPM2,XPO7,PIP5K1B,LOC101112634,NMRK1,RAB3GAP1,CCAR2,LOC106990932,KIAA2012,LOC105611679,RHOBTB2,LOC101121497,CEP44,LOC105609145,LOC106990539,LOC105609818,LOC101109865,POLR2D,LOC101102375,LOC101111773,LOC105611746,CWC22,GNRH1,HNRNPK,LOC101123012,MSTN,LOC101115858,LOC101106395,LOC105607885,RIC1,PEBP4,HOXD1,POLR1E,CASP8,CCDC25,GLRA3,DLX2,RIF1,BAG1,LOC101114849,HR,LOC1…
2	126555801	126556900	32052994	207432142	Milk protein percentage QTL (57738)	GORASP2,RASEF,LOC106990930,WDR33,NPM2,XPO7,PIP5K1B,LOC101112634,NMRK1,RAB3GAP1,CCAR2,LOC106990932,KIAA2012,LOC105611679,RHOBTB2,LOC101121497,CEP44,LOC105609145,LOC106990539,LOC105609818,LOC101109865,POLR2D,LOC101102375,LOC101111773,LOC105611746,CWC22,GNRH1,HNRNPK,LOC101123012,MSTN,LOC101115858,LOC101106395,LOC105607885,RIC1,PEBP4,HOXD1,POLR1E,CASP8,CCDC25,GLRA3,DLX2,RIF1,BAG1,LOC101114849,HR,LOC1…
2	126907801	126910600	32052994	207432142	Milk protein percentage QTL (57738)	GORASP2,RASEF,LOC106990930,WDR33,NPM2,XPO7,PIP5K1B,LOC101112634,NMRK1,RAB3GAP1,CCAR2,LOC106990932,KIAA2012,LOC105611679,RHOBTB2,LOC101121497,CEP44,LOC105609145,LOC106990539,LOC105609818,LOC101109865,POLR2D,LOC101102375,LOC101111773,LOC105611746,CWC22,GNRH1,HNRNPK,LOC101123012,MSTN,LOC101115858,LOC101106395,LOC105607885,RIC1,PEBP4,HOXD1,POLR1E,CASP8,CCDC25,GLRA3,DLX2,RIF1,BAG1,LOC101114849,HR,LOC1…
2	127410101	127411200	32052994	207432142	Milk protein percentage QTL (57738)	GORASP2,RASEF,LOC106990930,WDR33,NPM2,XPO7,PIP5K1B,LOC101112634,NMRK1,RAB3GAP1,CCAR2,LOC106990932,KIAA2012,LOC105611679,RHOBTB2,LOC101121497,CEP44,LOC105609145,LOC106990539,LOC105609818,LOC101109865,POLR2D,LOC101102375,LOC101111773,LOC105611746,CWC22,GNRH1,HNRNPK,LOC101123012,MSTN,LOC101115858,LOC101106395,LOC105607885,RIC1,PEBP4,HOXD1,POLR1E,CASP8,CCDC25,GLRA3,DLX2,RIF1,BAG1,LOC101114849,HR,LOC1…
2	127595301	127596300	32052994	207432142	Milk protein percentage QTL (57738)	GORASP2,RASEF,LOC106990930,WDR33,NPM2,XPO7,PIP5K1B,LOC101112634,NMRK1,RAB3GAP1,CCAR2,LOC106990932,KIAA2012,LOC105611679,RHOBTB2,LOC101121497,CEP44,LOC105609145,LOC106990539,LOC105609818,LOC101109865,POLR2D,LOC101102375,LOC101111773,LOC105611746,CWC22,GNRH1,HNRNPK,LOC101123012,MSTN,LOC101115858,LOC101106395,LOC105607885,RIC1,PEBP4,HOXD1,POLR1E,CASP8,CCDC25,GLRA3,DLX2,RIF1,BAG1,LOC101114849,HR,LOC1…
2	128050401	128052800	32052994	207432142	Milk protein percentage QTL (57738)	GORASP2,RASEF,LOC106990930,WDR33,NPM2,XPO7,PIP5K1B,LOC101112634,NMRK1,RAB3GAP1,CCAR2,LOC106990932,KIAA2012,LOC105611679,RHOBTB2,LOC101121497,CEP44,LOC105609145,LOC106990539,LOC105609818,LOC101109865,POLR2D,LOC101102375,LOC101111773,LOC105611746,CWC22,GNRH1,HNRNPK,LOC101123012,MSTN,LOC101115858,LOC101106395,LOC105607885,RIC1,PEBP4,HOXD1,POLR1E,CASP8,CCDC25,GLRA3,DLX2,RIF1,BAG1,LOC101114849,HR,LOC1…
2	128515201	128516200	32052994	207432142	Milk protein percentage QTL (57738)	GORASP2,RASEF,LOC106990930,WDR33,NPM2,XPO7,PIP5K1B,LOC101112634,NMRK1,RAB3GAP1,CCAR2,LOC106990932,KIAA2012,LOC105611679,RHOBTB2,LOC101121497,CEP44,LOC105609145,LOC106990539,LOC105609818,LOC101109865,POLR2D,LOC101102375,LOC101111773,LOC105611746,CWC22,GNRH1,HNRNPK,LOC101123012,MSTN,LOC101115858,LOC101106395,LOC105607885,RIC1,PEBP4,HOXD1,POLR1E,CASP8,CCDC25,GLRA3,DLX2,RIF1,BAG1,LOC101114849,HR,LOC1…
2	129143601	129145100	32052994	207432142	Milk protein percentage QTL (57738)	GORASP2,RASEF,LOC106990930,WDR33,NPM2,XPO7,PIP5K1B,LOC101112634,NMRK1,RAB3GAP1,CCAR2,LOC106990932,KIAA2012,LOC105611679,RHOBTB2,LOC101121497,CEP44,LOC105609145,LOC106990539,LOC105609818,LOC101109865,POLR2D,LOC101102375,LOC101111773,LOC105611746,CWC22,GNRH1,HNRNPK,LOC101123012,MSTN,LOC101115858,LOC101106395,LOC105607885,RIC1,PEBP4,HOXD1,POLR1E,CASP8,CCDC25,GLRA3,DLX2,RIF1,BAG1,LOC101114849,HR,LOC1…
2	129174301	129176000	32052994	207432142	Milk protein percentage QTL (57738)	GORASP2,RASEF,LOC106990930,WDR33,NPM2,XPO7,PIP5K1B,LOC101112634,NMRK1,RAB3GAP1,CCAR2,LOC106990932,KIAA2012,LOC105611679,RHOBTB2,LOC101121497,CEP44,LOC105609145,LOC106990539,LOC105609818,LOC101109865,POLR2D,LOC101102375,LOC101111773,LOC105611746,CWC22,GNRH1,HNRNPK,LOC101123012,MSTN,LOC101115858,LOC101106395,LOC105607885,RIC1,PEBP4,HOXD1,POLR1E,CASP8,CCDC25,GLRA3,DLX2,RIF1,BAG1,LOC101114849,HR,LOC1…
2	130033101	130038900	32052994	207432142	Milk protein percentage QTL (57738)	GORASP2,RASEF,LOC106990930,WDR33,NPM2,XPO7,PIP5K1B,LOC101112634,NMRK1,RAB3GAP1,CCAR2,LOC106990932,KIAA2012,LOC105611679,RHOBTB2,LOC101121497,CEP44,LOC105609145,LOC106990539,LOC105609818,LOC101109865,POLR2D,LOC101102375,LOC101111773,LOC105611746,CWC22,GNRH1,HNRNPK,LOC101123012,MSTN,LOC101115858,LOC101106395,LOC105607885,RIC1,PEBP4,HOXD1,POLR1E,CASP8,CCDC25,GLRA3,DLX2,RIF1,BAG1,LOC101114849,HR,LOC1…
2	130061901	130063000	32052994	207432142	Milk protein percentage QTL (57738)	GORASP2,RASEF,LOC106990930,WDR33,NPM2,XPO7,PIP5K1B,LOC101112634,NMRK1,RAB3GAP1,CCAR2,LOC106990932,KIAA2012,LOC105611679,RHOBTB2,LOC101121497,CEP44,LOC105609145,LOC106990539,LOC105609818,LOC101109865,POLR2D,LOC101102375,LOC101111773,LOC105611746,CWC22,GNRH1,HNRNPK,LOC101123012,MSTN,LOC101115858,LOC101106395,LOC105607885,RIC1,PEBP4,HOXD1,POLR1E,CASP8,CCDC25,GLRA3,DLX2,RIF1,BAG1,LOC101114849,HR,LOC1…
2	130756601	130757700	32052994	207432142	Milk protein percentage QTL (57738)	GORASP2,RASEF,LOC106990930,WDR33,NPM2,XPO7,PIP5K1B,LOC101112634,NMRK1,RAB3GAP1,CCAR2,LOC106990932,KIAA2012,LOC105611679,RHOBTB2,LOC101121497,CEP44,LOC105609145,LOC106990539,LOC105609818,LOC101109865,POLR2D,LOC101102375,LOC101111773,LOC105611746,CWC22,GNRH1,HNRNPK,LOC101123012,MSTN,LOC101115858,LOC101106395,LOC105607885,RIC1,PEBP4,HOXD1,POLR1E,CASP8,CCDC25,GLRA3,DLX2,RIF1,BAG1,LOC101114849,HR,LOC1…
2	131070801	131073200	32052994	207432142	Milk protein percentage QTL (57738)	GORASP2,RASEF,LOC106990930,WDR33,NPM2,XPO7,PIP5K1B,LOC101112634,NMRK1,RAB3GAP1,CCAR2,LOC106990932,KIAA2012,LOC105611679,RHOBTB2,LOC101121497,CEP44,LOC105609145,LOC106990539,LOC105609818,LOC101109865,POLR2D,LOC101102375,LOC101111773,LOC105611746,CWC22,GNRH1,HNRNPK,LOC101123012,MSTN,LOC101115858,LOC101106395,LOC105607885,RIC1,PEBP4,HOXD1,POLR1E,CASP8,CCDC25,GLRA3,DLX2,RIF1,BAG1,LOC101114849,HR,LOC1…
2	131213401	131214700	32052994	207432142	Milk protein percentage QTL (57738)	GORASP2,RASEF,LOC106990930,WDR33,NPM2,XPO7,PIP5K1B,LOC101112634,NMRK1,RAB3GAP1,CCAR2,LOC106990932,KIAA2012,LOC105611679,RHOBTB2,LOC101121497,CEP44,LOC105609145,LOC106990539,LOC105609818,LOC101109865,POLR2D,LOC101102375,LOC101111773,LOC105611746,CWC22,GNRH1,HNRNPK,LOC101123012,MSTN,LOC101115858,LOC101106395,LOC105607885,RIC1,PEBP4,HOXD1,POLR1E,CASP8,CCDC25,GLRA3,DLX2,RIF1,BAG1,LOC101114849,HR,LOC1…
2	132937601	132938900	32052994	207432142	Milk protein percentage QTL (57738)	GORASP2,RASEF,LOC106990930,WDR33,NPM2,XPO7,PIP5K1B,LOC101112634,NMRK1,RAB3GAP1,CCAR2,LOC106990932,KIAA2012,LOC105611679,RHOBTB2,LOC101121497,CEP44,LOC105609145,LOC106990539,LOC105609818,LOC101109865,POLR2D,LOC101102375,LOC101111773,LOC105611746,CWC22,GNRH1,HNRNPK,LOC101123012,MSTN,LOC101115858,LOC101106395,LOC105607885,RIC1,PEBP4,HOXD1,POLR1E,CASP8,CCDC25,GLRA3,DLX2,RIF1,BAG1,LOC101114849,HR,LOC1…
2	134001801	134004900	32052994	207432142	Milk protein percentage QTL (57738)	GORASP2,RASEF,LOC106990930,WDR33,NPM2,XPO7,PIP5K1B,LOC101112634,NMRK1,RAB3GAP1,CCAR2,LOC106990932,KIAA2012,LOC105611679,RHOBTB2,LOC101121497,CEP44,LOC105609145,LOC106990539,LOC105609818,LOC101109865,POLR2D,LOC101102375,LOC101111773,LOC105611746,CWC22,GNRH1,HNRNPK,LOC101123012,MSTN,LOC101115858,LOC101106395,LOC105607885,RIC1,PEBP4,HOXD1,POLR1E,CASP8,CCDC25,GLRA3,DLX2,RIF1,BAG1,LOC101114849,HR,LOC1…
2	134572001	134573000	32052994	207432142	Milk protein percentage QTL (57738)	GORASP2,RASEF,LOC106990930,WDR33,NPM2,XPO7,PIP5K1B,LOC101112634,NMRK1,RAB3GAP1,CCAR2,LOC106990932,KIAA2012,LOC105611679,RHOBTB2,LOC101121497,CEP44,LOC105609145,LOC106990539,LOC105609818,LOC101109865,POLR2D,LOC101102375,LOC101111773,LOC105611746,CWC22,GNRH1,HNRNPK,LOC101123012,MSTN,LOC101115858,LOC101106395,LOC105607885,RIC1,PEBP4,HOXD1,POLR1E,CASP8,CCDC25,GLRA3,DLX2,RIF1,BAG1,LOC101114849,HR,LOC1…
2	134845801	134847200	32052994	207432142	Milk protein percentage QTL (57738)	GORASP2,RASEF,LOC106990930,WDR33,NPM2,XPO7,PIP5K1B,LOC101112634,NMRK1,RAB3GAP1,CCAR2,LOC106990932,KIAA2012,LOC105611679,RHOBTB2,LOC101121497,CEP44,LOC105609145,LOC106990539,LOC105609818,LOC101109865,POLR2D,LOC101102375,LOC101111773,LOC105611746,CWC22,GNRH1,HNRNPK,LOC101123012,MSTN,LOC101115858,LOC101106395,LOC105607885,RIC1,PEBP4,HOXD1,POLR1E,CASP8,CCDC25,GLRA3,DLX2,RIF1,BAG1,LOC101114849,HR,LOC1…
2	134876101	134877600	32052994	207432142	Milk protein percentage QTL (57738)	GORASP2,RASEF,LOC106990930,WDR33,NPM2,XPO7,PIP5K1B,LOC101112634,NMRK1,RAB3GAP1,CCAR2,LOC106990932,KIAA2012,LOC105611679,RHOBTB2,LOC101121497,CEP44,LOC105609145,LOC106990539,LOC105609818,LOC101109865,POLR2D,LOC101102375,LOC101111773,LOC105611746,CWC22,GNRH1,HNRNPK,LOC101123012,MSTN,LOC101115858,LOC101106395,LOC105607885,RIC1,PEBP4,HOXD1,POLR1E,CASP8,CCDC25,GLRA3,DLX2,RIF1,BAG1,LOC101114849,HR,LOC1…
2	135027401	135030000	32052994	207432142	Milk protein percentage QTL (57738)	GORASP2,RASEF,LOC106990930,WDR33,NPM2,XPO7,PIP5K1B,LOC101112634,NMRK1,RAB3GAP1,CCAR2,LOC106990932,KIAA2012,LOC105611679,RHOBTB2,LOC101121497,CEP44,LOC105609145,LOC106990539,LOC105609818,LOC101109865,POLR2D,LOC101102375,LOC101111773,LOC105611746,CWC22,GNRH1,HNRNPK,LOC101123012,MSTN,LOC101115858,LOC101106395,LOC105607885,RIC1,PEBP4,HOXD1,POLR1E,CASP8,CCDC25,GLRA3,DLX2,RIF1,BAG1,LOC101114849,HR,LOC1…
2	135115101	135116400	32052994	207432142	Milk protein percentage QTL (57738)	GORASP2,RASEF,LOC106990930,WDR33,NPM2,XPO7,PIP5K1B,LOC101112634,NMRK1,RAB3GAP1,CCAR2,LOC106990932,KIAA2012,LOC105611679,RHOBTB2,LOC101121497,CEP44,LOC105609145,LOC106990539,LOC105609818,LOC101109865,POLR2D,LOC101102375,LOC101111773,LOC105611746,CWC22,GNRH1,HNRNPK,LOC101123012,MSTN,LOC101115858,LOC101106395,LOC105607885,RIC1,PEBP4,HOXD1,POLR1E,CASP8,CCDC25,GLRA3,DLX2,RIF1,BAG1,LOC101114849,HR,LOC1…
2	135506001	135507100	32052994	207432142	Milk protein percentage QTL (57738)	GORASP2,RASEF,LOC106990930,WDR33,NPM2,XPO7,PIP5K1B,LOC101112634,NMRK1,RAB3GAP1,CCAR2,LOC106990932,KIAA2012,LOC105611679,RHOBTB2,LOC101121497,CEP44,LOC105609145,LOC106990539,LOC105609818,LOC101109865,POLR2D,LOC101102375,LOC101111773,LOC105611746,CWC22,GNRH1,HNRNPK,LOC101123012,MSTN,LOC101115858,LOC101106395,LOC105607885,RIC1,PEBP4,HOXD1,POLR1E,CASP8,CCDC25,GLRA3,DLX2,RIF1,BAG1,LOC101114849,HR,LOC1…
2	136040701	136042600	32052994	207432142	Milk protein percentage QTL (57738)	GORASP2,RASEF,LOC106990930,WDR33,NPM2,XPO7,PIP5K1B,LOC101112634,NMRK1,RAB3GAP1,CCAR2,LOC106990932,KIAA2012,LOC105611679,RHOBTB2,LOC101121497,CEP44,LOC105609145,LOC106990539,LOC105609818,LOC101109865,POLR2D,LOC101102375,LOC101111773,LOC105611746,CWC22,GNRH1,HNRNPK,LOC101123012,MSTN,LOC101115858,LOC101106395,LOC105607885,RIC1,PEBP4,HOXD1,POLR1E,CASP8,CCDC25,GLRA3,DLX2,RIF1,BAG1,LOC101114849,HR,LOC1…
2	136829501	136830700	32052994	207432142	Milk protein percentage QTL (57738)	GORASP2,RASEF,LOC106990930,WDR33,NPM2,XPO7,PIP5K1B,LOC101112634,NMRK1,RAB3GAP1,CCAR2,LOC106990932,KIAA2012,LOC105611679,RHOBTB2,LOC101121497,CEP44,LOC105609145,LOC106990539,LOC105609818,LOC101109865,POLR2D,LOC101102375,LOC101111773,LOC105611746,CWC22,GNRH1,HNRNPK,LOC101123012,MSTN,LOC101115858,LOC101106395,LOC105607885,RIC1,PEBP4,HOXD1,POLR1E,CASP8,CCDC25,GLRA3,DLX2,RIF1,BAG1,LOC101114849,HR,LOC1…
2	139114101	139115300	32052994	207432142	Milk protein percentage QTL (57738)	GORASP2,RASEF,LOC106990930,WDR33,NPM2,XPO7,PIP5K1B,LOC101112634,NMRK1,RAB3GAP1,CCAR2,LOC106990932,KIAA2012,LOC105611679,RHOBTB2,LOC101121497,CEP44,LOC105609145,LOC106990539,LOC105609818,LOC101109865,POLR2D,LOC101102375,LOC101111773,LOC105611746,CWC22,GNRH1,HNRNPK,LOC101123012,MSTN,LOC101115858,LOC101106395,LOC105607885,RIC1,PEBP4,HOXD1,POLR1E,CASP8,CCDC25,GLRA3,DLX2,RIF1,BAG1,LOC101114849,HR,LOC1…
2	139634801	139636100	32052994	207432142	Milk protein percentage QTL (57738)	GORASP2,RASEF,LOC106990930,WDR33,NPM2,XPO7,PIP5K1B,LOC101112634,NMRK1,RAB3GAP1,CCAR2,LOC106990932,KIAA2012,LOC105611679,RHOBTB2,LOC101121497,CEP44,LOC105609145,LOC106990539,LOC105609818,LOC101109865,POLR2D,LOC101102375,LOC101111773,LOC105611746,CWC22,GNRH1,HNRNPK,LOC101123012,MSTN,LOC101115858,LOC101106395,LOC105607885,RIC1,PEBP4,HOXD1,POLR1E,CASP8,CCDC25,GLRA3,DLX2,RIF1,BAG1,LOC101114849,HR,LOC1…
2	140563301	140564500	32052994	207432142	Milk protein percentage QTL (57738)	GORASP2,RASEF,LOC106990930,WDR33,NPM2,XPO7,PIP5K1B,LOC101112634,NMRK1,RAB3GAP1,CCAR2,LOC106990932,KIAA2012,LOC105611679,RHOBTB2,LOC101121497,CEP44,LOC105609145,LOC106990539,LOC105609818,LOC101109865,POLR2D,LOC101102375,LOC101111773,LOC105611746,CWC22,GNRH1,HNRNPK,LOC101123012,MSTN,LOC101115858,LOC101106395,LOC105607885,RIC1,PEBP4,HOXD1,POLR1E,CASP8,CCDC25,GLRA3,DLX2,RIF1,BAG1,LOC101114849,HR,LOC1…
2	140737301	140738800	32052994	207432142	Milk protein percentage QTL (57738)	GORASP2,RASEF,LOC106990930,WDR33,NPM2,XPO7,PIP5K1B,LOC101112634,NMRK1,RAB3GAP1,CCAR2,LOC106990932,KIAA2012,LOC105611679,RHOBTB2,LOC101121497,CEP44,LOC105609145,LOC106990539,LOC105609818,LOC101109865,POLR2D,LOC101102375,LOC101111773,LOC105611746,CWC22,GNRH1,HNRNPK,LOC101123012,MSTN,LOC101115858,LOC101106395,LOC105607885,RIC1,PEBP4,HOXD1,POLR1E,CASP8,CCDC25,GLRA3,DLX2,RIF1,BAG1,LOC101114849,HR,LOC1…
2	141726601	141728000	32052994	207432142	Milk protein percentage QTL (57738)	GORASP2,RASEF,LOC106990930,WDR33,NPM2,XPO7,PIP5K1B,LOC101112634,NMRK1,RAB3GAP1,CCAR2,LOC106990932,KIAA2012,LOC105611679,RHOBTB2,LOC101121497,CEP44,LOC105609145,LOC106990539,LOC105609818,LOC101109865,POLR2D,LOC101102375,LOC101111773,LOC105611746,CWC22,GNRH1,HNRNPK,LOC101123012,MSTN,LOC101115858,LOC101106395,LOC105607885,RIC1,PEBP4,HOXD1,POLR1E,CASP8,CCDC25,GLRA3,DLX2,RIF1,BAG1,LOC101114849,HR,LOC1…
2	142253701	142254900	32052994	207432142	Milk protein percentage QTL (57738)	GORASP2,RASEF,LOC106990930,WDR33,NPM2,XPO7,PIP5K1B,LOC101112634,NMRK1,RAB3GAP1,CCAR2,LOC106990932,KIAA2012,LOC105611679,RHOBTB2,LOC101121497,CEP44,LOC105609145,LOC106990539,LOC105609818,LOC101109865,POLR2D,LOC101102375,LOC101111773,LOC105611746,CWC22,GNRH1,HNRNPK,LOC101123012,MSTN,LOC101115858,LOC101106395,LOC105607885,RIC1,PEBP4,HOXD1,POLR1E,CASP8,CCDC25,GLRA3,DLX2,RIF1,BAG1,LOC101114849,HR,LOC1…
2	144267901	144270900	32052994	207432142	Milk protein percentage QTL (57738)	GORASP2,RASEF,LOC106990930,WDR33,NPM2,XPO7,PIP5K1B,LOC101112634,NMRK1,RAB3GAP1,CCAR2,LOC106990932,KIAA2012,LOC105611679,RHOBTB2,LOC101121497,CEP44,LOC105609145,LOC106990539,LOC105609818,LOC101109865,POLR2D,LOC101102375,LOC101111773,LOC105611746,CWC22,GNRH1,HNRNPK,LOC101123012,MSTN,LOC101115858,LOC101106395,LOC105607885,RIC1,PEBP4,HOXD1,POLR1E,CASP8,CCDC25,GLRA3,DLX2,RIF1,BAG1,LOC101114849,HR,LOC1…
2	145002001	145003500	32052994	207432142	Milk protein percentage QTL (57738)	GORASP2,RASEF,LOC106990930,WDR33,NPM2,XPO7,PIP5K1B,LOC101112634,NMRK1,RAB3GAP1,CCAR2,LOC106990932,KIAA2012,LOC105611679,RHOBTB2,LOC101121497,CEP44,LOC105609145,LOC106990539,LOC105609818,LOC101109865,POLR2D,LOC101102375,LOC101111773,LOC105611746,CWC22,GNRH1,HNRNPK,LOC101123012,MSTN,LOC101115858,LOC101106395,LOC105607885,RIC1,PEBP4,HOXD1,POLR1E,CASP8,CCDC25,GLRA3,DLX2,RIF1,BAG1,LOC101114849,HR,LOC1…
2	145123701	145124900	32052994	207432142	Milk protein percentage QTL (57738)	GORASP2,RASEF,LOC106990930,WDR33,NPM2,XPO7,PIP5K1B,LOC101112634,NMRK1,RAB3GAP1,CCAR2,LOC106990932,KIAA2012,LOC105611679,RHOBTB2,LOC101121497,CEP44,LOC105609145,LOC106990539,LOC105609818,LOC101109865,POLR2D,LOC101102375,LOC101111773,LOC105611746,CWC22,GNRH1,HNRNPK,LOC101123012,MSTN,LOC101115858,LOC101106395,LOC105607885,RIC1,PEBP4,HOXD1,POLR1E,CASP8,CCDC25,GLRA3,DLX2,RIF1,BAG1,LOC101114849,HR,LOC1…
2	145867101	145868200	32052994	207432142	Milk protein percentage QTL (57738)	GORASP2,RASEF,LOC106990930,WDR33,NPM2,XPO7,PIP5K1B,LOC101112634,NMRK1,RAB3GAP1,CCAR2,LOC106990932,KIAA2012,LOC105611679,RHOBTB2,LOC101121497,CEP44,LOC105609145,LOC106990539,LOC105609818,LOC101109865,POLR2D,LOC101102375,LOC101111773,LOC105611746,CWC22,GNRH1,HNRNPK,LOC101123012,MSTN,LOC101115858,LOC101106395,LOC105607885,RIC1,PEBP4,HOXD1,POLR1E,CASP8,CCDC25,GLRA3,DLX2,RIF1,BAG1,LOC101114849,HR,LOC1…
2	146627301	146628600	32052994	207432142	Milk protein percentage QTL (57738)	GORASP2,RASEF,LOC106990930,WDR33,NPM2,XPO7,PIP5K1B,LOC101112634,NMRK1,RAB3GAP1,CCAR2,LOC106990932,KIAA2012,LOC105611679,RHOBTB2,LOC101121497,CEP44,LOC105609145,LOC106990539,LOC105609818,LOC101109865,POLR2D,LOC101102375,LOC101111773,LOC105611746,CWC22,GNRH1,HNRNPK,LOC101123012,MSTN,LOC101115858,LOC101106395,LOC105607885,RIC1,PEBP4,HOXD1,POLR1E,CASP8,CCDC25,GLRA3,DLX2,RIF1,BAG1,LOC101114849,HR,LOC1…
2	149068701	149070100	32052994	207432142	Milk protein percentage QTL (57738)	GORASP2,RASEF,LOC106990930,WDR33,NPM2,XPO7,PIP5K1B,LOC101112634,NMRK1,RAB3GAP1,CCAR2,LOC106990932,KIAA2012,LOC105611679,RHOBTB2,LOC101121497,CEP44,LOC105609145,LOC106990539,LOC105609818,LOC101109865,POLR2D,LOC101102375,LOC101111773,LOC105611746,CWC22,GNRH1,HNRNPK,LOC101123012,MSTN,LOC101115858,LOC101106395,LOC105607885,RIC1,PEBP4,HOXD1,POLR1E,CASP8,CCDC25,GLRA3,DLX2,RIF1,BAG1,LOC101114849,HR,LOC1…
2	150249101	150250200	32052994	207432142	Milk protein percentage QTL (57738)	GORASP2,RASEF,LOC106990930,WDR33,NPM2,XPO7,PIP5K1B,LOC101112634,NMRK1,RAB3GAP1,CCAR2,LOC106990932,KIAA2012,LOC105611679,RHOBTB2,LOC101121497,CEP44,LOC105609145,LOC106990539,LOC105609818,LOC101109865,POLR2D,LOC101102375,LOC101111773,LOC105611746,CWC22,GNRH1,HNRNPK,LOC101123012,MSTN,LOC101115858,LOC101106395,LOC105607885,RIC1,PEBP4,HOXD1,POLR1E,CASP8,CCDC25,GLRA3,DLX2,RIF1,BAG1,LOC101114849,HR,LOC1…
2	150408601	150409800	32052994	207432142	Milk protein percentage QTL (57738)	GORASP2,RASEF,LOC106990930,WDR33,NPM2,XPO7,PIP5K1B,LOC101112634,NMRK1,RAB3GAP1,CCAR2,LOC106990932,KIAA2012,LOC105611679,RHOBTB2,LOC101121497,CEP44,LOC105609145,LOC106990539,LOC105609818,LOC101109865,POLR2D,LOC101102375,LOC101111773,LOC105611746,CWC22,GNRH1,HNRNPK,LOC101123012,MSTN,LOC101115858,LOC101106395,LOC105607885,RIC1,PEBP4,HOXD1,POLR1E,CASP8,CCDC25,GLRA3,DLX2,RIF1,BAG1,LOC101114849,HR,LOC1…
2	150468201	150470400	32052994	207432142	Milk protein percentage QTL (57738)	GORASP2,RASEF,LOC106990930,WDR33,NPM2,XPO7,PIP5K1B,LOC101112634,NMRK1,RAB3GAP1,CCAR2,LOC106990932,KIAA2012,LOC105611679,RHOBTB2,LOC101121497,CEP44,LOC105609145,LOC106990539,LOC105609818,LOC101109865,POLR2D,LOC101102375,LOC101111773,LOC105611746,CWC22,GNRH1,HNRNPK,LOC101123012,MSTN,LOC101115858,LOC101106395,LOC105607885,RIC1,PEBP4,HOXD1,POLR1E,CASP8,CCDC25,GLRA3,DLX2,RIF1,BAG1,LOC101114849,HR,LOC1…
2	150492901	150493900	32052994	207432142	Milk protein percentage QTL (57738)	GORASP2,RASEF,LOC106990930,WDR33,NPM2,XPO7,PIP5K1B,LOC101112634,NMRK1,RAB3GAP1,CCAR2,LOC106990932,KIAA2012,LOC105611679,RHOBTB2,LOC101121497,CEP44,LOC105609145,LOC106990539,LOC105609818,LOC101109865,POLR2D,LOC101102375,LOC101111773,LOC105611746,CWC22,GNRH1,HNRNPK,LOC101123012,MSTN,LOC101115858,LOC101106395,LOC105607885,RIC1,PEBP4,HOXD1,POLR1E,CASP8,CCDC25,GLRA3,DLX2,RIF1,BAG1,LOC101114849,HR,LOC1…
2	150622301	150623400	32052994	207432142	Milk protein percentage QTL (57738)	GORASP2,RASEF,LOC106990930,WDR33,NPM2,XPO7,PIP5K1B,LOC101112634,NMRK1,RAB3GAP1,CCAR2,LOC106990932,KIAA2012,LOC105611679,RHOBTB2,LOC101121497,CEP44,LOC105609145,LOC106990539,LOC105609818,LOC101109865,POLR2D,LOC101102375,LOC101111773,LOC105611746,CWC22,GNRH1,HNRNPK,LOC101123012,MSTN,LOC101115858,LOC101106395,LOC105607885,RIC1,PEBP4,HOXD1,POLR1E,CASP8,CCDC25,GLRA3,DLX2,RIF1,BAG1,LOC101114849,HR,LOC1…
2	150927201	150928900	32052994	207432142	Milk protein percentage QTL (57738)	GORASP2,RASEF,LOC106990930,WDR33,NPM2,XPO7,PIP5K1B,LOC101112634,NMRK1,RAB3GAP1,CCAR2,LOC106990932,KIAA2012,LOC105611679,RHOBTB2,LOC101121497,CEP44,LOC105609145,LOC106990539,LOC105609818,LOC101109865,POLR2D,LOC101102375,LOC101111773,LOC105611746,CWC22,GNRH1,HNRNPK,LOC101123012,MSTN,LOC101115858,LOC101106395,LOC105607885,RIC1,PEBP4,HOXD1,POLR1E,CASP8,CCDC25,GLRA3,DLX2,RIF1,BAG1,LOC101114849,HR,LOC1…
2	151247601	151250100	32052994	207432142	Milk protein percentage QTL (57738)	GORASP2,RASEF,LOC106990930,WDR33,NPM2,XPO7,PIP5K1B,LOC101112634,NMRK1,RAB3GAP1,CCAR2,LOC106990932,KIAA2012,LOC105611679,RHOBTB2,LOC101121497,CEP44,LOC105609145,LOC106990539,LOC105609818,LOC101109865,POLR2D,LOC101102375,LOC101111773,LOC105611746,CWC22,GNRH1,HNRNPK,LOC101123012,MSTN,LOC101115858,LOC101106395,LOC105607885,RIC1,PEBP4,HOXD1,POLR1E,CASP8,CCDC25,GLRA3,DLX2,RIF1,BAG1,LOC101114849,HR,LOC1…
2	152019001	152020200	32052994	207432142	Milk protein percentage QTL (57738)	GORASP2,RASEF,LOC106990930,WDR33,NPM2,XPO7,PIP5K1B,LOC101112634,NMRK1,RAB3GAP1,CCAR2,LOC106990932,KIAA2012,LOC105611679,RHOBTB2,LOC101121497,CEP44,LOC105609145,LOC106990539,LOC105609818,LOC101109865,POLR2D,LOC101102375,LOC101111773,LOC105611746,CWC22,GNRH1,HNRNPK,LOC101123012,MSTN,LOC101115858,LOC101106395,LOC105607885,RIC1,PEBP4,HOXD1,POLR1E,CASP8,CCDC25,GLRA3,DLX2,RIF1,BAG1,LOC101114849,HR,LOC1…
2	152466201	152467400	32052994	207432142	Milk protein percentage QTL (57738)	GORASP2,RASEF,LOC106990930,WDR33,NPM2,XPO7,PIP5K1B,LOC101112634,NMRK1,RAB3GAP1,CCAR2,LOC106990932,KIAA2012,LOC105611679,RHOBTB2,LOC101121497,CEP44,LOC105609145,LOC106990539,LOC105609818,LOC101109865,POLR2D,LOC101102375,LOC101111773,LOC105611746,CWC22,GNRH1,HNRNPK,LOC101123012,MSTN,LOC101115858,LOC101106395,LOC105607885,RIC1,PEBP4,HOXD1,POLR1E,CASP8,CCDC25,GLRA3,DLX2,RIF1,BAG1,LOC101114849,HR,LOC1…
2	152853201	152854300	32052994	207432142	Milk protein percentage QTL (57738)	GORASP2,RASEF,LOC106990930,WDR33,NPM2,XPO7,PIP5K1B,LOC101112634,NMRK1,RAB3GAP1,CCAR2,LOC106990932,KIAA2012,LOC105611679,RHOBTB2,LOC101121497,CEP44,LOC105609145,LOC106990539,LOC105609818,LOC101109865,POLR2D,LOC101102375,LOC101111773,LOC105611746,CWC22,GNRH1,HNRNPK,LOC101123012,MSTN,LOC101115858,LOC101106395,LOC105607885,RIC1,PEBP4,HOXD1,POLR1E,CASP8,CCDC25,GLRA3,DLX2,RIF1,BAG1,LOC101114849,HR,LOC1…
2	153506501	153508600	32052994	207432142	Milk protein percentage QTL (57738)	GORASP2,RASEF,LOC106990930,WDR33,NPM2,XPO7,PIP5K1B,LOC101112634,NMRK1,RAB3GAP1,CCAR2,LOC106990932,KIAA2012,LOC105611679,RHOBTB2,LOC101121497,CEP44,LOC105609145,LOC106990539,LOC105609818,LOC101109865,POLR2D,LOC101102375,LOC101111773,LOC105611746,CWC22,GNRH1,HNRNPK,LOC101123012,MSTN,LOC101115858,LOC101106395,LOC105607885,RIC1,PEBP4,HOXD1,POLR1E,CASP8,CCDC25,GLRA3,DLX2,RIF1,BAG1,LOC101114849,HR,LOC1…
2	153936501	153941600	32052994	207432142	Milk protein percentage QTL (57738)	GORASP2,RASEF,LOC106990930,WDR33,NPM2,XPO7,PIP5K1B,LOC101112634,NMRK1,RAB3GAP1,CCAR2,LOC106990932,KIAA2012,LOC105611679,RHOBTB2,LOC101121497,CEP44,LOC105609145,LOC106990539,LOC105609818,LOC101109865,POLR2D,LOC101102375,LOC101111773,LOC105611746,CWC22,GNRH1,HNRNPK,LOC101123012,MSTN,LOC101115858,LOC101106395,LOC105607885,RIC1,PEBP4,HOXD1,POLR1E,CASP8,CCDC25,GLRA3,DLX2,RIF1,BAG1,LOC101114849,HR,LOC1…
2	154660501	154661600	32052994	207432142	Milk protein percentage QTL (57738)	GORASP2,RASEF,LOC106990930,WDR33,NPM2,XPO7,PIP5K1B,LOC101112634,NMRK1,RAB3GAP1,CCAR2,LOC106990932,KIAA2012,LOC105611679,RHOBTB2,LOC101121497,CEP44,LOC105609145,LOC106990539,LOC105609818,LOC101109865,POLR2D,LOC101102375,LOC101111773,LOC105611746,CWC22,GNRH1,HNRNPK,LOC101123012,MSTN,LOC101115858,LOC101106395,LOC105607885,RIC1,PEBP4,HOXD1,POLR1E,CASP8,CCDC25,GLRA3,DLX2,RIF1,BAG1,LOC101114849,HR,LOC1…
2	157323901	157334800	32052994	207432142	Milk protein percentage QTL (57738)	GORASP2,RASEF,LOC106990930,WDR33,NPM2,XPO7,PIP5K1B,LOC101112634,NMRK1,RAB3GAP1,CCAR2,LOC106990932,KIAA2012,LOC105611679,RHOBTB2,LOC101121497,CEP44,LOC105609145,LOC106990539,LOC105609818,LOC101109865,POLR2D,LOC101102375,LOC101111773,LOC105611746,CWC22,GNRH1,HNRNPK,LOC101123012,MSTN,LOC101115858,LOC101106395,LOC105607885,RIC1,PEBP4,HOXD1,POLR1E,CASP8,CCDC25,GLRA3,DLX2,RIF1,BAG1,LOC101114849,HR,LOC1…
2	157648301	157649400	32052994	207432142	Milk protein percentage QTL (57738)	GORASP2,RASEF,LOC106990930,WDR33,NPM2,XPO7,PIP5K1B,LOC101112634,NMRK1,RAB3GAP1,CCAR2,LOC106990932,KIAA2012,LOC105611679,RHOBTB2,LOC101121497,CEP44,LOC105609145,LOC106990539,LOC105609818,LOC101109865,POLR2D,LOC101102375,LOC101111773,LOC105611746,CWC22,GNRH1,HNRNPK,LOC101123012,MSTN,LOC101115858,LOC101106395,LOC105607885,RIC1,PEBP4,HOXD1,POLR1E,CASP8,CCDC25,GLRA3,DLX2,RIF1,BAG1,LOC101114849,HR,LOC1…
2	158897801	158899400	32052994	207432142	Milk protein percentage QTL (57738)	GORASP2,RASEF,LOC106990930,WDR33,NPM2,XPO7,PIP5K1B,LOC101112634,NMRK1,RAB3GAP1,CCAR2,LOC106990932,KIAA2012,LOC105611679,RHOBTB2,LOC101121497,CEP44,LOC105609145,LOC106990539,LOC105609818,LOC101109865,POLR2D,LOC101102375,LOC101111773,LOC105611746,CWC22,GNRH1,HNRNPK,LOC101123012,MSTN,LOC101115858,LOC101106395,LOC105607885,RIC1,PEBP4,HOXD1,POLR1E,CASP8,CCDC25,GLRA3,DLX2,RIF1,BAG1,LOC101114849,HR,LOC1…
2	159429201	159430200	32052994	207432142	Milk protein percentage QTL (57738)	GORASP2,RASEF,LOC106990930,WDR33,NPM2,XPO7,PIP5K1B,LOC101112634,NMRK1,RAB3GAP1,CCAR2,LOC106990932,KIAA2012,LOC105611679,RHOBTB2,LOC101121497,CEP44,LOC105609145,LOC106990539,LOC105609818,LOC101109865,POLR2D,LOC101102375,LOC101111773,LOC105611746,CWC22,GNRH1,HNRNPK,LOC101123012,MSTN,LOC101115858,LOC101106395,LOC105607885,RIC1,PEBP4,HOXD1,POLR1E,CASP8,CCDC25,GLRA3,DLX2,RIF1,BAG1,LOC101114849,HR,LOC1…
2	159598701	159599800	32052994	207432142	Milk protein percentage QTL (57738)	GORASP2,RASEF,LOC106990930,WDR33,NPM2,XPO7,PIP5K1B,LOC101112634,NMRK1,RAB3GAP1,CCAR2,LOC106990932,KIAA2012,LOC105611679,RHOBTB2,LOC101121497,CEP44,LOC105609145,LOC106990539,LOC105609818,LOC101109865,POLR2D,LOC101102375,LOC101111773,LOC105611746,CWC22,GNRH1,HNRNPK,LOC101123012,MSTN,LOC101115858,LOC101106395,LOC105607885,RIC1,PEBP4,HOXD1,POLR1E,CASP8,CCDC25,GLRA3,DLX2,RIF1,BAG1,LOC101114849,HR,LOC1…
2	159824901	159825900	32052994	207432142	Milk protein percentage QTL (57738)	GORASP2,RASEF,LOC106990930,WDR33,NPM2,XPO7,PIP5K1B,LOC101112634,NMRK1,RAB3GAP1,CCAR2,LOC106990932,KIAA2012,LOC105611679,RHOBTB2,LOC101121497,CEP44,LOC105609145,LOC106990539,LOC105609818,LOC101109865,POLR2D,LOC101102375,LOC101111773,LOC105611746,CWC22,GNRH1,HNRNPK,LOC101123012,MSTN,LOC101115858,LOC101106395,LOC105607885,RIC1,PEBP4,HOXD1,POLR1E,CASP8,CCDC25,GLRA3,DLX2,RIF1,BAG1,LOC101114849,HR,LOC1…
2	160886101	160887300	32052994	207432142	Milk protein percentage QTL (57738)	GORASP2,RASEF,LOC106990930,WDR33,NPM2,XPO7,PIP5K1B,LOC101112634,NMRK1,RAB3GAP1,CCAR2,LOC106990932,KIAA2012,LOC105611679,RHOBTB2,LOC101121497,CEP44,LOC105609145,LOC106990539,LOC105609818,LOC101109865,POLR2D,LOC101102375,LOC101111773,LOC105611746,CWC22,GNRH1,HNRNPK,LOC101123012,MSTN,LOC101115858,LOC101106395,LOC105607885,RIC1,PEBP4,HOXD1,POLR1E,CASP8,CCDC25,GLRA3,DLX2,RIF1,BAG1,LOC101114849,HR,LOC1…
2	161117801	161120400	32052994	207432142	Milk protein percentage QTL (57738)	GORASP2,RASEF,LOC106990930,WDR33,NPM2,XPO7,PIP5K1B,LOC101112634,NMRK1,RAB3GAP1,CCAR2,LOC106990932,KIAA2012,LOC105611679,RHOBTB2,LOC101121497,CEP44,LOC105609145,LOC106990539,LOC105609818,LOC101109865,POLR2D,LOC101102375,LOC101111773,LOC105611746,CWC22,GNRH1,HNRNPK,LOC101123012,MSTN,LOC101115858,LOC101106395,LOC105607885,RIC1,PEBP4,HOXD1,POLR1E,CASP8,CCDC25,GLRA3,DLX2,RIF1,BAG1,LOC101114849,HR,LOC1…
2	161171101	161172100	32052994	207432142	Milk protein percentage QTL (57738)	GORASP2,RASEF,LOC106990930,WDR33,NPM2,XPO7,PIP5K1B,LOC101112634,NMRK1,RAB3GAP1,CCAR2,LOC106990932,KIAA2012,LOC105611679,RHOBTB2,LOC101121497,CEP44,LOC105609145,LOC106990539,LOC105609818,LOC101109865,POLR2D,LOC101102375,LOC101111773,LOC105611746,CWC22,GNRH1,HNRNPK,LOC101123012,MSTN,LOC101115858,LOC101106395,LOC105607885,RIC1,PEBP4,HOXD1,POLR1E,CASP8,CCDC25,GLRA3,DLX2,RIF1,BAG1,LOC101114849,HR,LOC1…
2	161381001	161383200	32052994	207432142	Milk protein percentage QTL (57738)	GORASP2,RASEF,LOC106990930,WDR33,NPM2,XPO7,PIP5K1B,LOC101112634,NMRK1,RAB3GAP1,CCAR2,LOC106990932,KIAA2012,LOC105611679,RHOBTB2,LOC101121497,CEP44,LOC105609145,LOC106990539,LOC105609818,LOC101109865,POLR2D,LOC101102375,LOC101111773,LOC105611746,CWC22,GNRH1,HNRNPK,LOC101123012,MSTN,LOC101115858,LOC101106395,LOC105607885,RIC1,PEBP4,HOXD1,POLR1E,CASP8,CCDC25,GLRA3,DLX2,RIF1,BAG1,LOC101114849,HR,LOC1…
2	161522201	161523300	32052994	207432142	Milk protein percentage QTL (57738)	GORASP2,RASEF,LOC106990930,WDR33,NPM2,XPO7,PIP5K1B,LOC101112634,NMRK1,RAB3GAP1,CCAR2,LOC106990932,KIAA2012,LOC105611679,RHOBTB2,LOC101121497,CEP44,LOC105609145,LOC106990539,LOC105609818,LOC101109865,POLR2D,LOC101102375,LOC101111773,LOC105611746,CWC22,GNRH1,HNRNPK,LOC101123012,MSTN,LOC101115858,LOC101106395,LOC105607885,RIC1,PEBP4,HOXD1,POLR1E,CASP8,CCDC25,GLRA3,DLX2,RIF1,BAG1,LOC101114849,HR,LOC1…
2	161840201	161841200	32052994	207432142	Milk protein percentage QTL (57738)	GORASP2,RASEF,LOC106990930,WDR33,NPM2,XPO7,PIP5K1B,LOC101112634,NMRK1,RAB3GAP1,CCAR2,LOC106990932,KIAA2012,LOC105611679,RHOBTB2,LOC101121497,CEP44,LOC105609145,LOC106990539,LOC105609818,LOC101109865,POLR2D,LOC101102375,LOC101111773,LOC105611746,CWC22,GNRH1,HNRNPK,LOC101123012,MSTN,LOC101115858,LOC101106395,LOC105607885,RIC1,PEBP4,HOXD1,POLR1E,CASP8,CCDC25,GLRA3,DLX2,RIF1,BAG1,LOC101114849,HR,LOC1…
2	162324601	162326000	32052994	207432142	Milk protein percentage QTL (57738)	GORASP2,RASEF,LOC106990930,WDR33,NPM2,XPO7,PIP5K1B,LOC101112634,NMRK1,RAB3GAP1,CCAR2,LOC106990932,KIAA2012,LOC105611679,RHOBTB2,LOC101121497,CEP44,LOC105609145,LOC106990539,LOC105609818,LOC101109865,POLR2D,LOC101102375,LOC101111773,LOC105611746,CWC22,GNRH1,HNRNPK,LOC101123012,MSTN,LOC101115858,LOC101106395,LOC105607885,RIC1,PEBP4,HOXD1,POLR1E,CASP8,CCDC25,GLRA3,DLX2,RIF1,BAG1,LOC101114849,HR,LOC1…
2	162665801	162666900	32052994	207432142	Milk protein percentage QTL (57738)	GORASP2,RASEF,LOC106990930,WDR33,NPM2,XPO7,PIP5K1B,LOC101112634,NMRK1,RAB3GAP1,CCAR2,LOC106990932,KIAA2012,LOC105611679,RHOBTB2,LOC101121497,CEP44,LOC105609145,LOC106990539,LOC105609818,LOC101109865,POLR2D,LOC101102375,LOC101111773,LOC105611746,CWC22,GNRH1,HNRNPK,LOC101123012,MSTN,LOC101115858,LOC101106395,LOC105607885,RIC1,PEBP4,HOXD1,POLR1E,CASP8,CCDC25,GLRA3,DLX2,RIF1,BAG1,LOC101114849,HR,LOC1…
2	162965501	162967400	32052994	207432142	Milk protein percentage QTL (57738)	GORASP2,RASEF,LOC106990930,WDR33,NPM2,XPO7,PIP5K1B,LOC101112634,NMRK1,RAB3GAP1,CCAR2,LOC106990932,KIAA2012,LOC105611679,RHOBTB2,LOC101121497,CEP44,LOC105609145,LOC106990539,LOC105609818,LOC101109865,POLR2D,LOC101102375,LOC101111773,LOC105611746,CWC22,GNRH1,HNRNPK,LOC101123012,MSTN,LOC101115858,LOC101106395,LOC105607885,RIC1,PEBP4,HOXD1,POLR1E,CASP8,CCDC25,GLRA3,DLX2,RIF1,BAG1,LOC101114849,HR,LOC1…
2	163397301	163398800	32052994	207432142	Milk protein percentage QTL (57738)	GORASP2,RASEF,LOC106990930,WDR33,NPM2,XPO7,PIP5K1B,LOC101112634,NMRK1,RAB3GAP1,CCAR2,LOC106990932,KIAA2012,LOC105611679,RHOBTB2,LOC101121497,CEP44,LOC105609145,LOC106990539,LOC105609818,LOC101109865,POLR2D,LOC101102375,LOC101111773,LOC105611746,CWC22,GNRH1,HNRNPK,LOC101123012,MSTN,LOC101115858,LOC101106395,LOC105607885,RIC1,PEBP4,HOXD1,POLR1E,CASP8,CCDC25,GLRA3,DLX2,RIF1,BAG1,LOC101114849,HR,LOC1…
2	163485001	163487800	32052994	207432142	Milk protein percentage QTL (57738)	GORASP2,RASEF,LOC106990930,WDR33,NPM2,XPO7,PIP5K1B,LOC101112634,NMRK1,RAB3GAP1,CCAR2,LOC106990932,KIAA2012,LOC105611679,RHOBTB2,LOC101121497,CEP44,LOC105609145,LOC106990539,LOC105609818,LOC101109865,POLR2D,LOC101102375,LOC101111773,LOC105611746,CWC22,GNRH1,HNRNPK,LOC101123012,MSTN,LOC101115858,LOC101106395,LOC105607885,RIC1,PEBP4,HOXD1,POLR1E,CASP8,CCDC25,GLRA3,DLX2,RIF1,BAG1,LOC101114849,HR,LOC1…
2	164103701	164105000	32052994	207432142	Milk protein percentage QTL (57738)	GORASP2,RASEF,LOC106990930,WDR33,NPM2,XPO7,PIP5K1B,LOC101112634,NMRK1,RAB3GAP1,CCAR2,LOC106990932,KIAA2012,LOC105611679,RHOBTB2,LOC101121497,CEP44,LOC105609145,LOC106990539,LOC105609818,LOC101109865,POLR2D,LOC101102375,LOC101111773,LOC105611746,CWC22,GNRH1,HNRNPK,LOC101123012,MSTN,LOC101115858,LOC101106395,LOC105607885,RIC1,PEBP4,HOXD1,POLR1E,CASP8,CCDC25,GLRA3,DLX2,RIF1,BAG1,LOC101114849,HR,LOC1…
2	165948001	165949100	32052994	207432142	Milk protein percentage QTL (57738)	GORASP2,RASEF,LOC106990930,WDR33,NPM2,XPO7,PIP5K1B,LOC101112634,NMRK1,RAB3GAP1,CCAR2,LOC106990932,KIAA2012,LOC105611679,RHOBTB2,LOC101121497,CEP44,LOC105609145,LOC106990539,LOC105609818,LOC101109865,POLR2D,LOC101102375,LOC101111773,LOC105611746,CWC22,GNRH1,HNRNPK,LOC101123012,MSTN,LOC101115858,LOC101106395,LOC105607885,RIC1,PEBP4,HOXD1,POLR1E,CASP8,CCDC25,GLRA3,DLX2,RIF1,BAG1,LOC101114849,HR,LOC1…
2	166058201	166059300	32052994	207432142	Milk protein percentage QTL (57738)	GORASP2,RASEF,LOC106990930,WDR33,NPM2,XPO7,PIP5K1B,LOC101112634,NMRK1,RAB3GAP1,CCAR2,LOC106990932,KIAA2012,LOC105611679,RHOBTB2,LOC101121497,CEP44,LOC105609145,LOC106990539,LOC105609818,LOC101109865,POLR2D,LOC101102375,LOC101111773,LOC105611746,CWC22,GNRH1,HNRNPK,LOC101123012,MSTN,LOC101115858,LOC101106395,LOC105607885,RIC1,PEBP4,HOXD1,POLR1E,CASP8,CCDC25,GLRA3,DLX2,RIF1,BAG1,LOC101114849,HR,LOC1…
2	166292701	166293700	32052994	207432142	Milk protein percentage QTL (57738)	GORASP2,RASEF,LOC106990930,WDR33,NPM2,XPO7,PIP5K1B,LOC101112634,NMRK1,RAB3GAP1,CCAR2,LOC106990932,KIAA2012,LOC105611679,RHOBTB2,LOC101121497,CEP44,LOC105609145,LOC106990539,LOC105609818,LOC101109865,POLR2D,LOC101102375,LOC101111773,LOC105611746,CWC22,GNRH1,HNRNPK,LOC101123012,MSTN,LOC101115858,LOC101106395,LOC105607885,RIC1,PEBP4,HOXD1,POLR1E,CASP8,CCDC25,GLRA3,DLX2,RIF1,BAG1,LOC101114849,HR,LOC1…
2	166439901	166441700	32052994	207432142	Milk protein percentage QTL (57738)	GORASP2,RASEF,LOC106990930,WDR33,NPM2,XPO7,PIP5K1B,LOC101112634,NMRK1,RAB3GAP1,CCAR2,LOC106990932,KIAA2012,LOC105611679,RHOBTB2,LOC101121497,CEP44,LOC105609145,LOC106990539,LOC105609818,LOC101109865,POLR2D,LOC101102375,LOC101111773,LOC105611746,CWC22,GNRH1,HNRNPK,LOC101123012,MSTN,LOC101115858,LOC101106395,LOC105607885,RIC1,PEBP4,HOXD1,POLR1E,CASP8,CCDC25,GLRA3,DLX2,RIF1,BAG1,LOC101114849,HR,LOC1…
2	166493101	166494300	32052994	207432142	Milk protein percentage QTL (57738)	GORASP2,RASEF,LOC106990930,WDR33,NPM2,XPO7,PIP5K1B,LOC101112634,NMRK1,RAB3GAP1,CCAR2,LOC106990932,KIAA2012,LOC105611679,RHOBTB2,LOC101121497,CEP44,LOC105609145,LOC106990539,LOC105609818,LOC101109865,POLR2D,LOC101102375,LOC101111773,LOC105611746,CWC22,GNRH1,HNRNPK,LOC101123012,MSTN,LOC101115858,LOC101106395,LOC105607885,RIC1,PEBP4,HOXD1,POLR1E,CASP8,CCDC25,GLRA3,DLX2,RIF1,BAG1,LOC101114849,HR,LOC1…
2	166639701	166640700	32052994	207432142	Milk protein percentage QTL (57738)	GORASP2,RASEF,LOC106990930,WDR33,NPM2,XPO7,PIP5K1B,LOC101112634,NMRK1,RAB3GAP1,CCAR2,LOC106990932,KIAA2012,LOC105611679,RHOBTB2,LOC101121497,CEP44,LOC105609145,LOC106990539,LOC105609818,LOC101109865,POLR2D,LOC101102375,LOC101111773,LOC105611746,CWC22,GNRH1,HNRNPK,LOC101123012,MSTN,LOC101115858,LOC101106395,LOC105607885,RIC1,PEBP4,HOXD1,POLR1E,CASP8,CCDC25,GLRA3,DLX2,RIF1,BAG1,LOC101114849,HR,LOC1…
2	167122101	167123400	32052994	207432142	Milk protein percentage QTL (57738)	GORASP2,RASEF,LOC106990930,WDR33,NPM2,XPO7,PIP5K1B,LOC101112634,NMRK1,RAB3GAP1,CCAR2,LOC106990932,KIAA2012,LOC105611679,RHOBTB2,LOC101121497,CEP44,LOC105609145,LOC106990539,LOC105609818,LOC101109865,POLR2D,LOC101102375,LOC101111773,LOC105611746,CWC22,GNRH1,HNRNPK,LOC101123012,MSTN,LOC101115858,LOC101106395,LOC105607885,RIC1,PEBP4,HOXD1,POLR1E,CASP8,CCDC25,GLRA3,DLX2,RIF1,BAG1,LOC101114849,HR,LOC1…
2	167562601	167563600	32052994	207432142	Milk protein percentage QTL (57738)	GORASP2,RASEF,LOC106990930,WDR33,NPM2,XPO7,PIP5K1B,LOC101112634,NMRK1,RAB3GAP1,CCAR2,LOC106990932,KIAA2012,LOC105611679,RHOBTB2,LOC101121497,CEP44,LOC105609145,LOC106990539,LOC105609818,LOC101109865,POLR2D,LOC101102375,LOC101111773,LOC105611746,CWC22,GNRH1,HNRNPK,LOC101123012,MSTN,LOC101115858,LOC101106395,LOC105607885,RIC1,PEBP4,HOXD1,POLR1E,CASP8,CCDC25,GLRA3,DLX2,RIF1,BAG1,LOC101114849,HR,LOC1…
2	167700601	167702100	32052994	207432142	Milk protein percentage QTL (57738)	GORASP2,RASEF,LOC106990930,WDR33,NPM2,XPO7,PIP5K1B,LOC101112634,NMRK1,RAB3GAP1,CCAR2,LOC106990932,KIAA2012,LOC105611679,RHOBTB2,LOC101121497,CEP44,LOC105609145,LOC106990539,LOC105609818,LOC101109865,POLR2D,LOC101102375,LOC101111773,LOC105611746,CWC22,GNRH1,HNRNPK,LOC101123012,MSTN,LOC101115858,LOC101106395,LOC105607885,RIC1,PEBP4,HOXD1,POLR1E,CASP8,CCDC25,GLRA3,DLX2,RIF1,BAG1,LOC101114849,HR,LOC1…
2	168470701	168473200	32052994	207432142	Milk protein percentage QTL (57738)	GORASP2,RASEF,LOC106990930,WDR33,NPM2,XPO7,PIP5K1B,LOC101112634,NMRK1,RAB3GAP1,CCAR2,LOC106990932,KIAA2012,LOC105611679,RHOBTB2,LOC101121497,CEP44,LOC105609145,LOC106990539,LOC105609818,LOC101109865,POLR2D,LOC101102375,LOC101111773,LOC105611746,CWC22,GNRH1,HNRNPK,LOC101123012,MSTN,LOC101115858,LOC101106395,LOC105607885,RIC1,PEBP4,HOXD1,POLR1E,CASP8,CCDC25,GLRA3,DLX2,RIF1,BAG1,LOC101114849,HR,LOC1…
2	168586201	168587300	32052994	207432142	Milk protein percentage QTL (57738)	GORASP2,RASEF,LOC106990930,WDR33,NPM2,XPO7,PIP5K1B,LOC101112634,NMRK1,RAB3GAP1,CCAR2,LOC106990932,KIAA2012,LOC105611679,RHOBTB2,LOC101121497,CEP44,LOC105609145,LOC106990539,LOC105609818,LOC101109865,POLR2D,LOC101102375,LOC101111773,LOC105611746,CWC22,GNRH1,HNRNPK,LOC101123012,MSTN,LOC101115858,LOC101106395,LOC105607885,RIC1,PEBP4,HOXD1,POLR1E,CASP8,CCDC25,GLRA3,DLX2,RIF1,BAG1,LOC101114849,HR,LOC1…
2	168827101	168828700	32052994	207432142	Milk protein percentage QTL (57738)	GORASP2,RASEF,LOC106990930,WDR33,NPM2,XPO7,PIP5K1B,LOC101112634,NMRK1,RAB3GAP1,CCAR2,LOC106990932,KIAA2012,LOC105611679,RHOBTB2,LOC101121497,CEP44,LOC105609145,LOC106990539,LOC105609818,LOC101109865,POLR2D,LOC101102375,LOC101111773,LOC105611746,CWC22,GNRH1,HNRNPK,LOC101123012,MSTN,LOC101115858,LOC101106395,LOC105607885,RIC1,PEBP4,HOXD1,POLR1E,CASP8,CCDC25,GLRA3,DLX2,RIF1,BAG1,LOC101114849,HR,LOC1…
2	169393801	169394900	32052994	207432142	Milk protein percentage QTL (57738)	GORASP2,RASEF,LOC106990930,WDR33,NPM2,XPO7,PIP5K1B,LOC101112634,NMRK1,RAB3GAP1,CCAR2,LOC106990932,KIAA2012,LOC105611679,RHOBTB2,LOC101121497,CEP44,LOC105609145,LOC106990539,LOC105609818,LOC101109865,POLR2D,LOC101102375,LOC101111773,LOC105611746,CWC22,GNRH1,HNRNPK,LOC101123012,MSTN,LOC101115858,LOC101106395,LOC105607885,RIC1,PEBP4,HOXD1,POLR1E,CASP8,CCDC25,GLRA3,DLX2,RIF1,BAG1,LOC101114849,HR,LOC1…
2	170391401	170393100	32052994	207432142	Milk protein percentage QTL (57738)	GORASP2,RASEF,LOC106990930,WDR33,NPM2,XPO7,PIP5K1B,LOC101112634,NMRK1,RAB3GAP1,CCAR2,LOC106990932,KIAA2012,LOC105611679,RHOBTB2,LOC101121497,CEP44,LOC105609145,LOC106990539,LOC105609818,LOC101109865,POLR2D,LOC101102375,LOC101111773,LOC105611746,CWC22,GNRH1,HNRNPK,LOC101123012,MSTN,LOC101115858,LOC101106395,LOC105607885,RIC1,PEBP4,HOXD1,POLR1E,CASP8,CCDC25,GLRA3,DLX2,RIF1,BAG1,LOC101114849,HR,LOC1…
2	170634201	170635400	32052994	207432142	Milk protein percentage QTL (57738)	GORASP2,RASEF,LOC106990930,WDR33,NPM2,XPO7,PIP5K1B,LOC101112634,NMRK1,RAB3GAP1,CCAR2,LOC106990932,KIAA2012,LOC105611679,RHOBTB2,LOC101121497,CEP44,LOC105609145,LOC106990539,LOC105609818,LOC101109865,POLR2D,LOC101102375,LOC101111773,LOC105611746,CWC22,GNRH1,HNRNPK,LOC101123012,MSTN,LOC101115858,LOC101106395,LOC105607885,RIC1,PEBP4,HOXD1,POLR1E,CASP8,CCDC25,GLRA3,DLX2,RIF1,BAG1,LOC101114849,HR,LOC1…
2	171119901	171121900	32052994	207432142	Milk protein percentage QTL (57738)	GORASP2,RASEF,LOC106990930,WDR33,NPM2,XPO7,PIP5K1B,LOC101112634,NMRK1,RAB3GAP1,CCAR2,LOC106990932,KIAA2012,LOC105611679,RHOBTB2,LOC101121497,CEP44,LOC105609145,LOC106990539,LOC105609818,LOC101109865,POLR2D,LOC101102375,LOC101111773,LOC105611746,CWC22,GNRH1,HNRNPK,LOC101123012,MSTN,LOC101115858,LOC101106395,LOC105607885,RIC1,PEBP4,HOXD1,POLR1E,CASP8,CCDC25,GLRA3,DLX2,RIF1,BAG1,LOC101114849,HR,LOC1…
2	172218701	172223900	32052994	207432142	Milk protein percentage QTL (57738)	GORASP2,RASEF,LOC106990930,WDR33,NPM2,XPO7,PIP5K1B,LOC101112634,NMRK1,RAB3GAP1,CCAR2,LOC106990932,KIAA2012,LOC105611679,RHOBTB2,LOC101121497,CEP44,LOC105609145,LOC106990539,LOC105609818,LOC101109865,POLR2D,LOC101102375,LOC101111773,LOC105611746,CWC22,GNRH1,HNRNPK,LOC101123012,MSTN,LOC101115858,LOC101106395,LOC105607885,RIC1,PEBP4,HOXD1,POLR1E,CASP8,CCDC25,GLRA3,DLX2,RIF1,BAG1,LOC101114849,HR,LOC1…
2	172644001	172649300	32052994	207432142	Milk protein percentage QTL (57738)	GORASP2,RASEF,LOC106990930,WDR33,NPM2,XPO7,PIP5K1B,LOC101112634,NMRK1,RAB3GAP1,CCAR2,LOC106990932,KIAA2012,LOC105611679,RHOBTB2,LOC101121497,CEP44,LOC105609145,LOC106990539,LOC105609818,LOC101109865,POLR2D,LOC101102375,LOC101111773,LOC105611746,CWC22,GNRH1,HNRNPK,LOC101123012,MSTN,LOC101115858,LOC101106395,LOC105607885,RIC1,PEBP4,HOXD1,POLR1E,CASP8,CCDC25,GLRA3,DLX2,RIF1,BAG1,LOC101114849,HR,LOC1…
2	173339701	173347000	32052994	207432142	Milk protein percentage QTL (57738)	GORASP2,RASEF,LOC106990930,WDR33,NPM2,XPO7,PIP5K1B,LOC101112634,NMRK1,RAB3GAP1,CCAR2,LOC106990932,KIAA2012,LOC105611679,RHOBTB2,LOC101121497,CEP44,LOC105609145,LOC106990539,LOC105609818,LOC101109865,POLR2D,LOC101102375,LOC101111773,LOC105611746,CWC22,GNRH1,HNRNPK,LOC101123012,MSTN,LOC101115858,LOC101106395,LOC105607885,RIC1,PEBP4,HOXD1,POLR1E,CASP8,CCDC25,GLRA3,DLX2,RIF1,BAG1,LOC101114849,HR,LOC1…
2	174222101	174223200	32052994	207432142	Milk protein percentage QTL (57738)	GORASP2,RASEF,LOC106990930,WDR33,NPM2,XPO7,PIP5K1B,LOC101112634,NMRK1,RAB3GAP1,CCAR2,LOC106990932,KIAA2012,LOC105611679,RHOBTB2,LOC101121497,CEP44,LOC105609145,LOC106990539,LOC105609818,LOC101109865,POLR2D,LOC101102375,LOC101111773,LOC105611746,CWC22,GNRH1,HNRNPK,LOC101123012,MSTN,LOC101115858,LOC101106395,LOC105607885,RIC1,PEBP4,HOXD1,POLR1E,CASP8,CCDC25,GLRA3,DLX2,RIF1,BAG1,LOC101114849,HR,LOC1…
2	174678801	174679900	32052994	207432142	Milk protein percentage QTL (57738)	GORASP2,RASEF,LOC106990930,WDR33,NPM2,XPO7,PIP5K1B,LOC101112634,NMRK1,RAB3GAP1,CCAR2,LOC106990932,KIAA2012,LOC105611679,RHOBTB2,LOC101121497,CEP44,LOC105609145,LOC106990539,LOC105609818,LOC101109865,POLR2D,LOC101102375,LOC101111773,LOC105611746,CWC22,GNRH1,HNRNPK,LOC101123012,MSTN,LOC101115858,LOC101106395,LOC105607885,RIC1,PEBP4,HOXD1,POLR1E,CASP8,CCDC25,GLRA3,DLX2,RIF1,BAG1,LOC101114849,HR,LOC1…
2	174749701	174751700	32052994	207432142	Milk protein percentage QTL (57738)	GORASP2,RASEF,LOC106990930,WDR33,NPM2,XPO7,PIP5K1B,LOC101112634,NMRK1,RAB3GAP1,CCAR2,LOC106990932,KIAA2012,LOC105611679,RHOBTB2,LOC101121497,CEP44,LOC105609145,LOC106990539,LOC105609818,LOC101109865,POLR2D,LOC101102375,LOC101111773,LOC105611746,CWC22,GNRH1,HNRNPK,LOC101123012,MSTN,LOC101115858,LOC101106395,LOC105607885,RIC1,PEBP4,HOXD1,POLR1E,CASP8,CCDC25,GLRA3,DLX2,RIF1,BAG1,LOC101114849,HR,LOC1…
2	175921101	175922100	32052994	207432142	Milk protein percentage QTL (57738)	GORASP2,RASEF,LOC106990930,WDR33,NPM2,XPO7,PIP5K1B,LOC101112634,NMRK1,RAB3GAP1,CCAR2,LOC106990932,KIAA2012,LOC105611679,RHOBTB2,LOC101121497,CEP44,LOC105609145,LOC106990539,LOC105609818,LOC101109865,POLR2D,LOC101102375,LOC101111773,LOC105611746,CWC22,GNRH1,HNRNPK,LOC101123012,MSTN,LOC101115858,LOC101106395,LOC105607885,RIC1,PEBP4,HOXD1,POLR1E,CASP8,CCDC25,GLRA3,DLX2,RIF1,BAG1,LOC101114849,HR,LOC1…
2	176319801	176320800	32052994	207432142	Milk protein percentage QTL (57738)	GORASP2,RASEF,LOC106990930,WDR33,NPM2,XPO7,PIP5K1B,LOC101112634,NMRK1,RAB3GAP1,CCAR2,LOC106990932,KIAA2012,LOC105611679,RHOBTB2,LOC101121497,CEP44,LOC105609145,LOC106990539,LOC105609818,LOC101109865,POLR2D,LOC101102375,LOC101111773,LOC105611746,CWC22,GNRH1,HNRNPK,LOC101123012,MSTN,LOC101115858,LOC101106395,LOC105607885,RIC1,PEBP4,HOXD1,POLR1E,CASP8,CCDC25,GLRA3,DLX2,RIF1,BAG1,LOC101114849,HR,LOC1…
2	177591101	177592100	32052994	207432142	Milk protein percentage QTL (57738)	GORASP2,RASEF,LOC106990930,WDR33,NPM2,XPO7,PIP5K1B,LOC101112634,NMRK1,RAB3GAP1,CCAR2,LOC106990932,KIAA2012,LOC105611679,RHOBTB2,LOC101121497,CEP44,LOC105609145,LOC106990539,LOC105609818,LOC101109865,POLR2D,LOC101102375,LOC101111773,LOC105611746,CWC22,GNRH1,HNRNPK,LOC101123012,MSTN,LOC101115858,LOC101106395,LOC105607885,RIC1,PEBP4,HOXD1,POLR1E,CASP8,CCDC25,GLRA3,DLX2,RIF1,BAG1,LOC101114849,HR,LOC1…
2	177859701	177861700	32052994	207432142	Milk protein percentage QTL (57738)	GORASP2,RASEF,LOC106990930,WDR33,NPM2,XPO7,PIP5K1B,LOC101112634,NMRK1,RAB3GAP1,CCAR2,LOC106990932,KIAA2012,LOC105611679,RHOBTB2,LOC101121497,CEP44,LOC105609145,LOC106990539,LOC105609818,LOC101109865,POLR2D,LOC101102375,LOC101111773,LOC105611746,CWC22,GNRH1,HNRNPK,LOC101123012,MSTN,LOC101115858,LOC101106395,LOC105607885,RIC1,PEBP4,HOXD1,POLR1E,CASP8,CCDC25,GLRA3,DLX2,RIF1,BAG1,LOC101114849,HR,LOC1…
2	178497501	178503700	32052994	207432142	Milk protein percentage QTL (57738)	GORASP2,RASEF,LOC106990930,WDR33,NPM2,XPO7,PIP5K1B,LOC101112634,NMRK1,RAB3GAP1,CCAR2,LOC106990932,KIAA2012,LOC105611679,RHOBTB2,LOC101121497,CEP44,LOC105609145,LOC106990539,LOC105609818,LOC101109865,POLR2D,LOC101102375,LOC101111773,LOC105611746,CWC22,GNRH1,HNRNPK,LOC101123012,MSTN,LOC101115858,LOC101106395,LOC105607885,RIC1,PEBP4,HOXD1,POLR1E,CASP8,CCDC25,GLRA3,DLX2,RIF1,BAG1,LOC101114849,HR,LOC1…
2	178857701	178858800	32052994	207432142	Milk protein percentage QTL (57738)	GORASP2,RASEF,LOC106990930,WDR33,NPM2,XPO7,PIP5K1B,LOC101112634,NMRK1,RAB3GAP1,CCAR2,LOC106990932,KIAA2012,LOC105611679,RHOBTB2,LOC101121497,CEP44,LOC105609145,LOC106990539,LOC105609818,LOC101109865,POLR2D,LOC101102375,LOC101111773,LOC105611746,CWC22,GNRH1,HNRNPK,LOC101123012,MSTN,LOC101115858,LOC101106395,LOC105607885,RIC1,PEBP4,HOXD1,POLR1E,CASP8,CCDC25,GLRA3,DLX2,RIF1,BAG1,LOC101114849,HR,LOC1…
2	179050001	179051000	32052994	207432142	Milk protein percentage QTL (57738)	GORASP2,RASEF,LOC106990930,WDR33,NPM2,XPO7,PIP5K1B,LOC101112634,NMRK1,RAB3GAP1,CCAR2,LOC106990932,KIAA2012,LOC105611679,RHOBTB2,LOC101121497,CEP44,LOC105609145,LOC106990539,LOC105609818,LOC101109865,POLR2D,LOC101102375,LOC101111773,LOC105611746,CWC22,GNRH1,HNRNPK,LOC101123012,MSTN,LOC101115858,LOC101106395,LOC105607885,RIC1,PEBP4,HOXD1,POLR1E,CASP8,CCDC25,GLRA3,DLX2,RIF1,BAG1,LOC101114849,HR,LOC1…
2	179074901	179075900	32052994	207432142	Milk protein percentage QTL (57738)	GORASP2,RASEF,LOC106990930,WDR33,NPM2,XPO7,PIP5K1B,LOC101112634,NMRK1,RAB3GAP1,CCAR2,LOC106990932,KIAA2012,LOC105611679,RHOBTB2,LOC101121497,CEP44,LOC105609145,LOC106990539,LOC105609818,LOC101109865,POLR2D,LOC101102375,LOC101111773,LOC105611746,CWC22,GNRH1,HNRNPK,LOC101123012,MSTN,LOC101115858,LOC101106395,LOC105607885,RIC1,PEBP4,HOXD1,POLR1E,CASP8,CCDC25,GLRA3,DLX2,RIF1,BAG1,LOC101114849,HR,LOC1…
2	179343801	179345800	32052994	207432142	Milk protein percentage QTL (57738)	GORASP2,RASEF,LOC106990930,WDR33,NPM2,XPO7,PIP5K1B,LOC101112634,NMRK1,RAB3GAP1,CCAR2,LOC106990932,KIAA2012,LOC105611679,RHOBTB2,LOC101121497,CEP44,LOC105609145,LOC106990539,LOC105609818,LOC101109865,POLR2D,LOC101102375,LOC101111773,LOC105611746,CWC22,GNRH1,HNRNPK,LOC101123012,MSTN,LOC101115858,LOC101106395,LOC105607885,RIC1,PEBP4,HOXD1,POLR1E,CASP8,CCDC25,GLRA3,DLX2,RIF1,BAG1,LOC101114849,HR,LOC1…
2	180629201	180630300	32052994	207432142	Milk protein percentage QTL (57738)	GORASP2,RASEF,LOC106990930,WDR33,NPM2,XPO7,PIP5K1B,LOC101112634,NMRK1,RAB3GAP1,CCAR2,LOC106990932,KIAA2012,LOC105611679,RHOBTB2,LOC101121497,CEP44,LOC105609145,LOC106990539,LOC105609818,LOC101109865,POLR2D,LOC101102375,LOC101111773,LOC105611746,CWC22,GNRH1,HNRNPK,LOC101123012,MSTN,LOC101115858,LOC101106395,LOC105607885,RIC1,PEBP4,HOXD1,POLR1E,CASP8,CCDC25,GLRA3,DLX2,RIF1,BAG1,LOC101114849,HR,LOC1…
2	180716201	180718400	32052994	207432142	Milk protein percentage QTL (57738)	GORASP2,RASEF,LOC106990930,WDR33,NPM2,XPO7,PIP5K1B,LOC101112634,NMRK1,RAB3GAP1,CCAR2,LOC106990932,KIAA2012,LOC105611679,RHOBTB2,LOC101121497,CEP44,LOC105609145,LOC106990539,LOC105609818,LOC101109865,POLR2D,LOC101102375,LOC101111773,LOC105611746,CWC22,GNRH1,HNRNPK,LOC101123012,MSTN,LOC101115858,LOC101106395,LOC105607885,RIC1,PEBP4,HOXD1,POLR1E,CASP8,CCDC25,GLRA3,DLX2,RIF1,BAG1,LOC101114849,HR,LOC1…
2	180989701	180990700	32052994	207432142	Milk protein percentage QTL (57738)	GORASP2,RASEF,LOC106990930,WDR33,NPM2,XPO7,PIP5K1B,LOC101112634,NMRK1,RAB3GAP1,CCAR2,LOC106990932,KIAA2012,LOC105611679,RHOBTB2,LOC101121497,CEP44,LOC105609145,LOC106990539,LOC105609818,LOC101109865,POLR2D,LOC101102375,LOC101111773,LOC105611746,CWC22,GNRH1,HNRNPK,LOC101123012,MSTN,LOC101115858,LOC101106395,LOC105607885,RIC1,PEBP4,HOXD1,POLR1E,CASP8,CCDC25,GLRA3,DLX2,RIF1,BAG1,LOC101114849,HR,LOC1…
2	181093501	181094600	32052994	207432142	Milk protein percentage QTL (57738)	GORASP2,RASEF,LOC106990930,WDR33,NPM2,XPO7,PIP5K1B,LOC101112634,NMRK1,RAB3GAP1,CCAR2,LOC106990932,KIAA2012,LOC105611679,RHOBTB2,LOC101121497,CEP44,LOC105609145,LOC106990539,LOC105609818,LOC101109865,POLR2D,LOC101102375,LOC101111773,LOC105611746,CWC22,GNRH1,HNRNPK,LOC101123012,MSTN,LOC101115858,LOC101106395,LOC105607885,RIC1,PEBP4,HOXD1,POLR1E,CASP8,CCDC25,GLRA3,DLX2,RIF1,BAG1,LOC101114849,HR,LOC1…
2	181593401	181594800	32052994	207432142	Milk protein percentage QTL (57738)	GORASP2,RASEF,LOC106990930,WDR33,NPM2,XPO7,PIP5K1B,LOC101112634,NMRK1,RAB3GAP1,CCAR2,LOC106990932,KIAA2012,LOC105611679,RHOBTB2,LOC101121497,CEP44,LOC105609145,LOC106990539,LOC105609818,LOC101109865,POLR2D,LOC101102375,LOC101111773,LOC105611746,CWC22,GNRH1,HNRNPK,LOC101123012,MSTN,LOC101115858,LOC101106395,LOC105607885,RIC1,PEBP4,HOXD1,POLR1E,CASP8,CCDC25,GLRA3,DLX2,RIF1,BAG1,LOC101114849,HR,LOC1…
2	182136601	182137700	32052994	207432142	Milk protein percentage QTL (57738)	GORASP2,RASEF,LOC106990930,WDR33,NPM2,XPO7,PIP5K1B,LOC101112634,NMRK1,RAB3GAP1,CCAR2,LOC106990932,KIAA2012,LOC105611679,RHOBTB2,LOC101121497,CEP44,LOC105609145,LOC106990539,LOC105609818,LOC101109865,POLR2D,LOC101102375,LOC101111773,LOC105611746,CWC22,GNRH1,HNRNPK,LOC101123012,MSTN,LOC101115858,LOC101106395,LOC105607885,RIC1,PEBP4,HOXD1,POLR1E,CASP8,CCDC25,GLRA3,DLX2,RIF1,BAG1,LOC101114849,HR,LOC1…
2	182662601	182664100	32052994	207432142	Milk protein percentage QTL (57738)	GORASP2,RASEF,LOC106990930,WDR33,NPM2,XPO7,PIP5K1B,LOC101112634,NMRK1,RAB3GAP1,CCAR2,LOC106990932,KIAA2012,LOC105611679,RHOBTB2,LOC101121497,CEP44,LOC105609145,LOC106990539,LOC105609818,LOC101109865,POLR2D,LOC101102375,LOC101111773,LOC105611746,CWC22,GNRH1,HNRNPK,LOC101123012,MSTN,LOC101115858,LOC101106395,LOC105607885,RIC1,PEBP4,HOXD1,POLR1E,CASP8,CCDC25,GLRA3,DLX2,RIF1,BAG1,LOC101114849,HR,LOC1…
2	182674501	182675700	32052994	207432142	Milk protein percentage QTL (57738)	GORASP2,RASEF,LOC106990930,WDR33,NPM2,XPO7,PIP5K1B,LOC101112634,NMRK1,RAB3GAP1,CCAR2,LOC106990932,KIAA2012,LOC105611679,RHOBTB2,LOC101121497,CEP44,LOC105609145,LOC106990539,LOC105609818,LOC101109865,POLR2D,LOC101102375,LOC101111773,LOC105611746,CWC22,GNRH1,HNRNPK,LOC101123012,MSTN,LOC101115858,LOC101106395,LOC105607885,RIC1,PEBP4,HOXD1,POLR1E,CASP8,CCDC25,GLRA3,DLX2,RIF1,BAG1,LOC101114849,HR,LOC1…
2	182680601	182681700	32052994	207432142	Milk protein percentage QTL (57738)	GORASP2,RASEF,LOC106990930,WDR33,NPM2,XPO7,PIP5K1B,LOC101112634,NMRK1,RAB3GAP1,CCAR2,LOC106990932,KIAA2012,LOC105611679,RHOBTB2,LOC101121497,CEP44,LOC105609145,LOC106990539,LOC105609818,LOC101109865,POLR2D,LOC101102375,LOC101111773,LOC105611746,CWC22,GNRH1,HNRNPK,LOC101123012,MSTN,LOC101115858,LOC101106395,LOC105607885,RIC1,PEBP4,HOXD1,POLR1E,CASP8,CCDC25,GLRA3,DLX2,RIF1,BAG1,LOC101114849,HR,LOC1…
2	182877501	182879100	32052994	207432142	Milk protein percentage QTL (57738)	GORASP2,RASEF,LOC106990930,WDR33,NPM2,XPO7,PIP5K1B,LOC101112634,NMRK1,RAB3GAP1,CCAR2,LOC106990932,KIAA2012,LOC105611679,RHOBTB2,LOC101121497,CEP44,LOC105609145,LOC106990539,LOC105609818,LOC101109865,POLR2D,LOC101102375,LOC101111773,LOC105611746,CWC22,GNRH1,HNRNPK,LOC101123012,MSTN,LOC101115858,LOC101106395,LOC105607885,RIC1,PEBP4,HOXD1,POLR1E,CASP8,CCDC25,GLRA3,DLX2,RIF1,BAG1,LOC101114849,HR,LOC1…
2	184428001	184430000	32052994	207432142	Milk protein percentage QTL (57738)	GORASP2,RASEF,LOC106990930,WDR33,NPM2,XPO7,PIP5K1B,LOC101112634,NMRK1,RAB3GAP1,CCAR2,LOC106990932,KIAA2012,LOC105611679,RHOBTB2,LOC101121497,CEP44,LOC105609145,LOC106990539,LOC105609818,LOC101109865,POLR2D,LOC101102375,LOC101111773,LOC105611746,CWC22,GNRH1,HNRNPK,LOC101123012,MSTN,LOC101115858,LOC101106395,LOC105607885,RIC1,PEBP4,HOXD1,POLR1E,CASP8,CCDC25,GLRA3,DLX2,RIF1,BAG1,LOC101114849,HR,LOC1…
2	184851901	184854200	32052994	207432142	Milk protein percentage QTL (57738)	GORASP2,RASEF,LOC106990930,WDR33,NPM2,XPO7,PIP5K1B,LOC101112634,NMRK1,RAB3GAP1,CCAR2,LOC106990932,KIAA2012,LOC105611679,RHOBTB2,LOC101121497,CEP44,LOC105609145,LOC106990539,LOC105609818,LOC101109865,POLR2D,LOC101102375,LOC101111773,LOC105611746,CWC22,GNRH1,HNRNPK,LOC101123012,MSTN,LOC101115858,LOC101106395,LOC105607885,RIC1,PEBP4,HOXD1,POLR1E,CASP8,CCDC25,GLRA3,DLX2,RIF1,BAG1,LOC101114849,HR,LOC1…
2	186127601	186131400	32052994	207432142	Milk protein percentage QTL (57738)	GORASP2,RASEF,LOC106990930,WDR33,NPM2,XPO7,PIP5K1B,LOC101112634,NMRK1,RAB3GAP1,CCAR2,LOC106990932,KIAA2012,LOC105611679,RHOBTB2,LOC101121497,CEP44,LOC105609145,LOC106990539,LOC105609818,LOC101109865,POLR2D,LOC101102375,LOC101111773,LOC105611746,CWC22,GNRH1,HNRNPK,LOC101123012,MSTN,LOC101115858,LOC101106395,LOC105607885,RIC1,PEBP4,HOXD1,POLR1E,CASP8,CCDC25,GLRA3,DLX2,RIF1,BAG1,LOC101114849,HR,LOC1…
2	186161801	186162800	32052994	207432142	Milk protein percentage QTL (57738)	GORASP2,RASEF,LOC106990930,WDR33,NPM2,XPO7,PIP5K1B,LOC101112634,NMRK1,RAB3GAP1,CCAR2,LOC106990932,KIAA2012,LOC105611679,RHOBTB2,LOC101121497,CEP44,LOC105609145,LOC106990539,LOC105609818,LOC101109865,POLR2D,LOC101102375,LOC101111773,LOC105611746,CWC22,GNRH1,HNRNPK,LOC101123012,MSTN,LOC101115858,LOC101106395,LOC105607885,RIC1,PEBP4,HOXD1,POLR1E,CASP8,CCDC25,GLRA3,DLX2,RIF1,BAG1,LOC101114849,HR,LOC1…
2	186223201	186224300	32052994	207432142	Milk protein percentage QTL (57738)	GORASP2,RASEF,LOC106990930,WDR33,NPM2,XPO7,PIP5K1B,LOC101112634,NMRK1,RAB3GAP1,CCAR2,LOC106990932,KIAA2012,LOC105611679,RHOBTB2,LOC101121497,CEP44,LOC105609145,LOC106990539,LOC105609818,LOC101109865,POLR2D,LOC101102375,LOC101111773,LOC105611746,CWC22,GNRH1,HNRNPK,LOC101123012,MSTN,LOC101115858,LOC101106395,LOC105607885,RIC1,PEBP4,HOXD1,POLR1E,CASP8,CCDC25,GLRA3,DLX2,RIF1,BAG1,LOC101114849,HR,LOC1…
2	186879601	186882600	32052994	207432142	Milk protein percentage QTL (57738)	GORASP2,RASEF,LOC106990930,WDR33,NPM2,XPO7,PIP5K1B,LOC101112634,NMRK1,RAB3GAP1,CCAR2,LOC106990932,KIAA2012,LOC105611679,RHOBTB2,LOC101121497,CEP44,LOC105609145,LOC106990539,LOC105609818,LOC101109865,POLR2D,LOC101102375,LOC101111773,LOC105611746,CWC22,GNRH1,HNRNPK,LOC101123012,MSTN,LOC101115858,LOC101106395,LOC105607885,RIC1,PEBP4,HOXD1,POLR1E,CASP8,CCDC25,GLRA3,DLX2,RIF1,BAG1,LOC101114849,HR,LOC1…
2	186917901	186923300	32052994	207432142	Milk protein percentage QTL (57738)	GORASP2,RASEF,LOC106990930,WDR33,NPM2,XPO7,PIP5K1B,LOC101112634,NMRK1,RAB3GAP1,CCAR2,LOC106990932,KIAA2012,LOC105611679,RHOBTB2,LOC101121497,CEP44,LOC105609145,LOC106990539,LOC105609818,LOC101109865,POLR2D,LOC101102375,LOC101111773,LOC105611746,CWC22,GNRH1,HNRNPK,LOC101123012,MSTN,LOC101115858,LOC101106395,LOC105607885,RIC1,PEBP4,HOXD1,POLR1E,CASP8,CCDC25,GLRA3,DLX2,RIF1,BAG1,LOC101114849,HR,LOC1…
2	186950701	186952600	32052994	207432142	Milk protein percentage QTL (57738)	GORASP2,RASEF,LOC106990930,WDR33,NPM2,XPO7,PIP5K1B,LOC101112634,NMRK1,RAB3GAP1,CCAR2,LOC106990932,KIAA2012,LOC105611679,RHOBTB2,LOC101121497,CEP44,LOC105609145,LOC106990539,LOC105609818,LOC101109865,POLR2D,LOC101102375,LOC101111773,LOC105611746,CWC22,GNRH1,HNRNPK,LOC101123012,MSTN,LOC101115858,LOC101106395,LOC105607885,RIC1,PEBP4,HOXD1,POLR1E,CASP8,CCDC25,GLRA3,DLX2,RIF1,BAG1,LOC101114849,HR,LOC1…
2	187070401	187076700	32052994	207432142	Milk protein percentage QTL (57738)	GORASP2,RASEF,LOC106990930,WDR33,NPM2,XPO7,PIP5K1B,LOC101112634,NMRK1,RAB3GAP1,CCAR2,LOC106990932,KIAA2012,LOC105611679,RHOBTB2,LOC101121497,CEP44,LOC105609145,LOC106990539,LOC105609818,LOC101109865,POLR2D,LOC101102375,LOC101111773,LOC105611746,CWC22,GNRH1,HNRNPK,LOC101123012,MSTN,LOC101115858,LOC101106395,LOC105607885,RIC1,PEBP4,HOXD1,POLR1E,CASP8,CCDC25,GLRA3,DLX2,RIF1,BAG1,LOC101114849,HR,LOC1…
2	187732901	187734600	32052994	207432142	Milk protein percentage QTL (57738)	GORASP2,RASEF,LOC106990930,WDR33,NPM2,XPO7,PIP5K1B,LOC101112634,NMRK1,RAB3GAP1,CCAR2,LOC106990932,KIAA2012,LOC105611679,RHOBTB2,LOC101121497,CEP44,LOC105609145,LOC106990539,LOC105609818,LOC101109865,POLR2D,LOC101102375,LOC101111773,LOC105611746,CWC22,GNRH1,HNRNPK,LOC101123012,MSTN,LOC101115858,LOC101106395,LOC105607885,RIC1,PEBP4,HOXD1,POLR1E,CASP8,CCDC25,GLRA3,DLX2,RIF1,BAG1,LOC101114849,HR,LOC1…
2	190272301	190273800	32052994	207432142	Milk protein percentage QTL (57738)	GORASP2,RASEF,LOC106990930,WDR33,NPM2,XPO7,PIP5K1B,LOC101112634,NMRK1,RAB3GAP1,CCAR2,LOC106990932,KIAA2012,LOC105611679,RHOBTB2,LOC101121497,CEP44,LOC105609145,LOC106990539,LOC105609818,LOC101109865,POLR2D,LOC101102375,LOC101111773,LOC105611746,CWC22,GNRH1,HNRNPK,LOC101123012,MSTN,LOC101115858,LOC101106395,LOC105607885,RIC1,PEBP4,HOXD1,POLR1E,CASP8,CCDC25,GLRA3,DLX2,RIF1,BAG1,LOC101114849,HR,LOC1…
2	190323701	190324700	32052994	207432142	Milk protein percentage QTL (57738)	GORASP2,RASEF,LOC106990930,WDR33,NPM2,XPO7,PIP5K1B,LOC101112634,NMRK1,RAB3GAP1,CCAR2,LOC106990932,KIAA2012,LOC105611679,RHOBTB2,LOC101121497,CEP44,LOC105609145,LOC106990539,LOC105609818,LOC101109865,POLR2D,LOC101102375,LOC101111773,LOC105611746,CWC22,GNRH1,HNRNPK,LOC101123012,MSTN,LOC101115858,LOC101106395,LOC105607885,RIC1,PEBP4,HOXD1,POLR1E,CASP8,CCDC25,GLRA3,DLX2,RIF1,BAG1,LOC101114849,HR,LOC1…
2	190380101	190385400	32052994	207432142	Milk protein percentage QTL (57738)	GORASP2,RASEF,LOC106990930,WDR33,NPM2,XPO7,PIP5K1B,LOC101112634,NMRK1,RAB3GAP1,CCAR2,LOC106990932,KIAA2012,LOC105611679,RHOBTB2,LOC101121497,CEP44,LOC105609145,LOC106990539,LOC105609818,LOC101109865,POLR2D,LOC101102375,LOC101111773,LOC105611746,CWC22,GNRH1,HNRNPK,LOC101123012,MSTN,LOC101115858,LOC101106395,LOC105607885,RIC1,PEBP4,HOXD1,POLR1E,CASP8,CCDC25,GLRA3,DLX2,RIF1,BAG1,LOC101114849,HR,LOC1…
2	190469901	190475700	32052994	207432142	Milk protein percentage QTL (57738)	GORASP2,RASEF,LOC106990930,WDR33,NPM2,XPO7,PIP5K1B,LOC101112634,NMRK1,RAB3GAP1,CCAR2,LOC106990932,KIAA2012,LOC105611679,RHOBTB2,LOC101121497,CEP44,LOC105609145,LOC106990539,LOC105609818,LOC101109865,POLR2D,LOC101102375,LOC101111773,LOC105611746,CWC22,GNRH1,HNRNPK,LOC101123012,MSTN,LOC101115858,LOC101106395,LOC105607885,RIC1,PEBP4,HOXD1,POLR1E,CASP8,CCDC25,GLRA3,DLX2,RIF1,BAG1,LOC101114849,HR,LOC1…
2	190718801	190720300	32052994	207432142	Milk protein percentage QTL (57738)	GORASP2,RASEF,LOC106990930,WDR33,NPM2,XPO7,PIP5K1B,LOC101112634,NMRK1,RAB3GAP1,CCAR2,LOC106990932,KIAA2012,LOC105611679,RHOBTB2,LOC101121497,CEP44,LOC105609145,LOC106990539,LOC105609818,LOC101109865,POLR2D,LOC101102375,LOC101111773,LOC105611746,CWC22,GNRH1,HNRNPK,LOC101123012,MSTN,LOC101115858,LOC101106395,LOC105607885,RIC1,PEBP4,HOXD1,POLR1E,CASP8,CCDC25,GLRA3,DLX2,RIF1,BAG1,LOC101114849,HR,LOC1…
2	191007601	191008700	32052994	207432142	Milk protein percentage QTL (57738)	GORASP2,RASEF,LOC106990930,WDR33,NPM2,XPO7,PIP5K1B,LOC101112634,NMRK1,RAB3GAP1,CCAR2,LOC106990932,KIAA2012,LOC105611679,RHOBTB2,LOC101121497,CEP44,LOC105609145,LOC106990539,LOC105609818,LOC101109865,POLR2D,LOC101102375,LOC101111773,LOC105611746,CWC22,GNRH1,HNRNPK,LOC101123012,MSTN,LOC101115858,LOC101106395,LOC105607885,RIC1,PEBP4,HOXD1,POLR1E,CASP8,CCDC25,GLRA3,DLX2,RIF1,BAG1,LOC101114849,HR,LOC1…
2	191678501	191680400	32052994	207432142	Milk protein percentage QTL (57738)	GORASP2,RASEF,LOC106990930,WDR33,NPM2,XPO7,PIP5K1B,LOC101112634,NMRK1,RAB3GAP1,CCAR2,LOC106990932,KIAA2012,LOC105611679,RHOBTB2,LOC101121497,CEP44,LOC105609145,LOC106990539,LOC105609818,LOC101109865,POLR2D,LOC101102375,LOC101111773,LOC105611746,CWC22,GNRH1,HNRNPK,LOC101123012,MSTN,LOC101115858,LOC101106395,LOC105607885,RIC1,PEBP4,HOXD1,POLR1E,CASP8,CCDC25,GLRA3,DLX2,RIF1,BAG1,LOC101114849,HR,LOC1…
2	192224401	192225900	32052994	207432142	Milk protein percentage QTL (57738)	GORASP2,RASEF,LOC106990930,WDR33,NPM2,XPO7,PIP5K1B,LOC101112634,NMRK1,RAB3GAP1,CCAR2,LOC106990932,KIAA2012,LOC105611679,RHOBTB2,LOC101121497,CEP44,LOC105609145,LOC106990539,LOC105609818,LOC101109865,POLR2D,LOC101102375,LOC101111773,LOC105611746,CWC22,GNRH1,HNRNPK,LOC101123012,MSTN,LOC101115858,LOC101106395,LOC105607885,RIC1,PEBP4,HOXD1,POLR1E,CASP8,CCDC25,GLRA3,DLX2,RIF1,BAG1,LOC101114849,HR,LOC1…
2	193114601	193116100	32052994	207432142	Milk protein percentage QTL (57738)	GORASP2,RASEF,LOC106990930,WDR33,NPM2,XPO7,PIP5K1B,LOC101112634,NMRK1,RAB3GAP1,CCAR2,LOC106990932,KIAA2012,LOC105611679,RHOBTB2,LOC101121497,CEP44,LOC105609145,LOC106990539,LOC105609818,LOC101109865,POLR2D,LOC101102375,LOC101111773,LOC105611746,CWC22,GNRH1,HNRNPK,LOC101123012,MSTN,LOC101115858,LOC101106395,LOC105607885,RIC1,PEBP4,HOXD1,POLR1E,CASP8,CCDC25,GLRA3,DLX2,RIF1,BAG1,LOC101114849,HR,LOC1…
2	193140701	193142000	32052994	207432142	Milk protein percentage QTL (57738)	GORASP2,RASEF,LOC106990930,WDR33,NPM2,XPO7,PIP5K1B,LOC101112634,NMRK1,RAB3GAP1,CCAR2,LOC106990932,KIAA2012,LOC105611679,RHOBTB2,LOC101121497,CEP44,LOC105609145,LOC106990539,LOC105609818,LOC101109865,POLR2D,LOC101102375,LOC101111773,LOC105611746,CWC22,GNRH1,HNRNPK,LOC101123012,MSTN,LOC101115858,LOC101106395,LOC105607885,RIC1,PEBP4,HOXD1,POLR1E,CASP8,CCDC25,GLRA3,DLX2,RIF1,BAG1,LOC101114849,HR,LOC1…
2	193373401	193374700	32052994	207432142	Milk protein percentage QTL (57738)	GORASP2,RASEF,LOC106990930,WDR33,NPM2,XPO7,PIP5K1B,LOC101112634,NMRK1,RAB3GAP1,CCAR2,LOC106990932,KIAA2012,LOC105611679,RHOBTB2,LOC101121497,CEP44,LOC105609145,LOC106990539,LOC105609818,LOC101109865,POLR2D,LOC101102375,LOC101111773,LOC105611746,CWC22,GNRH1,HNRNPK,LOC101123012,MSTN,LOC101115858,LOC101106395,LOC105607885,RIC1,PEBP4,HOXD1,POLR1E,CASP8,CCDC25,GLRA3,DLX2,RIF1,BAG1,LOC101114849,HR,LOC1…
2	193629201	193630400	32052994	207432142	Milk protein percentage QTL (57738)	GORASP2,RASEF,LOC106990930,WDR33,NPM2,XPO7,PIP5K1B,LOC101112634,NMRK1,RAB3GAP1,CCAR2,LOC106990932,KIAA2012,LOC105611679,RHOBTB2,LOC101121497,CEP44,LOC105609145,LOC106990539,LOC105609818,LOC101109865,POLR2D,LOC101102375,LOC101111773,LOC105611746,CWC22,GNRH1,HNRNPK,LOC101123012,MSTN,LOC101115858,LOC101106395,LOC105607885,RIC1,PEBP4,HOXD1,POLR1E,CASP8,CCDC25,GLRA3,DLX2,RIF1,BAG1,LOC101114849,HR,LOC1…
2	193653801	193654900	32052994	207432142	Milk protein percentage QTL (57738)	GORASP2,RASEF,LOC106990930,WDR33,NPM2,XPO7,PIP5K1B,LOC101112634,NMRK1,RAB3GAP1,CCAR2,LOC106990932,KIAA2012,LOC105611679,RHOBTB2,LOC101121497,CEP44,LOC105609145,LOC106990539,LOC105609818,LOC101109865,POLR2D,LOC101102375,LOC101111773,LOC105611746,CWC22,GNRH1,HNRNPK,LOC101123012,MSTN,LOC101115858,LOC101106395,LOC105607885,RIC1,PEBP4,HOXD1,POLR1E,CASP8,CCDC25,GLRA3,DLX2,RIF1,BAG1,LOC101114849,HR,LOC1…
2	193975101	193976900	32052994	207432142	Milk protein percentage QTL (57738)	GORASP2,RASEF,LOC106990930,WDR33,NPM2,XPO7,PIP5K1B,LOC101112634,NMRK1,RAB3GAP1,CCAR2,LOC106990932,KIAA2012,LOC105611679,RHOBTB2,LOC101121497,CEP44,LOC105609145,LOC106990539,LOC105609818,LOC101109865,POLR2D,LOC101102375,LOC101111773,LOC105611746,CWC22,GNRH1,HNRNPK,LOC101123012,MSTN,LOC101115858,LOC101106395,LOC105607885,RIC1,PEBP4,HOXD1,POLR1E,CASP8,CCDC25,GLRA3,DLX2,RIF1,BAG1,LOC101114849,HR,LOC1…
2	194018601	194020000	32052994	207432142	Milk protein percentage QTL (57738)	GORASP2,RASEF,LOC106990930,WDR33,NPM2,XPO7,PIP5K1B,LOC101112634,NMRK1,RAB3GAP1,CCAR2,LOC106990932,KIAA2012,LOC105611679,RHOBTB2,LOC101121497,CEP44,LOC105609145,LOC106990539,LOC105609818,LOC101109865,POLR2D,LOC101102375,LOC101111773,LOC105611746,CWC22,GNRH1,HNRNPK,LOC101123012,MSTN,LOC101115858,LOC101106395,LOC105607885,RIC1,PEBP4,HOXD1,POLR1E,CASP8,CCDC25,GLRA3,DLX2,RIF1,BAG1,LOC101114849,HR,LOC1…
2	194420301	194423100	32052994	207432142	Milk protein percentage QTL (57738)	GORASP2,RASEF,LOC106990930,WDR33,NPM2,XPO7,PIP5K1B,LOC101112634,NMRK1,RAB3GAP1,CCAR2,LOC106990932,KIAA2012,LOC105611679,RHOBTB2,LOC101121497,CEP44,LOC105609145,LOC106990539,LOC105609818,LOC101109865,POLR2D,LOC101102375,LOC101111773,LOC105611746,CWC22,GNRH1,HNRNPK,LOC101123012,MSTN,LOC101115858,LOC101106395,LOC105607885,RIC1,PEBP4,HOXD1,POLR1E,CASP8,CCDC25,GLRA3,DLX2,RIF1,BAG1,LOC101114849,HR,LOC1…
2	195779001	195780100	32052994	207432142	Milk protein percentage QTL (57738)	GORASP2,RASEF,LOC106990930,WDR33,NPM2,XPO7,PIP5K1B,LOC101112634,NMRK1,RAB3GAP1,CCAR2,LOC106990932,KIAA2012,LOC105611679,RHOBTB2,LOC101121497,CEP44,LOC105609145,LOC106990539,LOC105609818,LOC101109865,POLR2D,LOC101102375,LOC101111773,LOC105611746,CWC22,GNRH1,HNRNPK,LOC101123012,MSTN,LOC101115858,LOC101106395,LOC105607885,RIC1,PEBP4,HOXD1,POLR1E,CASP8,CCDC25,GLRA3,DLX2,RIF1,BAG1,LOC101114849,HR,LOC1…
2	196461901	196463000	32052994	207432142	Milk protein percentage QTL (57738)	GORASP2,RASEF,LOC106990930,WDR33,NPM2,XPO7,PIP5K1B,LOC101112634,NMRK1,RAB3GAP1,CCAR2,LOC106990932,KIAA2012,LOC105611679,RHOBTB2,LOC101121497,CEP44,LOC105609145,LOC106990539,LOC105609818,LOC101109865,POLR2D,LOC101102375,LOC101111773,LOC105611746,CWC22,GNRH1,HNRNPK,LOC101123012,MSTN,LOC101115858,LOC101106395,LOC105607885,RIC1,PEBP4,HOXD1,POLR1E,CASP8,CCDC25,GLRA3,DLX2,RIF1,BAG1,LOC101114849,HR,LOC1…
2	196508501	196509800	32052994	207432142	Milk protein percentage QTL (57738)	GORASP2,RASEF,LOC106990930,WDR33,NPM2,XPO7,PIP5K1B,LOC101112634,NMRK1,RAB3GAP1,CCAR2,LOC106990932,KIAA2012,LOC105611679,RHOBTB2,LOC101121497,CEP44,LOC105609145,LOC106990539,LOC105609818,LOC101109865,POLR2D,LOC101102375,LOC101111773,LOC105611746,CWC22,GNRH1,HNRNPK,LOC101123012,MSTN,LOC101115858,LOC101106395,LOC105607885,RIC1,PEBP4,HOXD1,POLR1E,CASP8,CCDC25,GLRA3,DLX2,RIF1,BAG1,LOC101114849,HR,LOC1…
2	196732701	196734000	32052994	207432142	Milk protein percentage QTL (57738)	GORASP2,RASEF,LOC106990930,WDR33,NPM2,XPO7,PIP5K1B,LOC101112634,NMRK1,RAB3GAP1,CCAR2,LOC106990932,KIAA2012,LOC105611679,RHOBTB2,LOC101121497,CEP44,LOC105609145,LOC106990539,LOC105609818,LOC101109865,POLR2D,LOC101102375,LOC101111773,LOC105611746,CWC22,GNRH1,HNRNPK,LOC101123012,MSTN,LOC101115858,LOC101106395,LOC105607885,RIC1,PEBP4,HOXD1,POLR1E,CASP8,CCDC25,GLRA3,DLX2,RIF1,BAG1,LOC101114849,HR,LOC1…
2	197299601	197300600	32052994	207432142	Milk protein percentage QTL (57738)	GORASP2,RASEF,LOC106990930,WDR33,NPM2,XPO7,PIP5K1B,LOC101112634,NMRK1,RAB3GAP1,CCAR2,LOC106990932,KIAA2012,LOC105611679,RHOBTB2,LOC101121497,CEP44,LOC105609145,LOC106990539,LOC105609818,LOC101109865,POLR2D,LOC101102375,LOC101111773,LOC105611746,CWC22,GNRH1,HNRNPK,LOC101123012,MSTN,LOC101115858,LOC101106395,LOC105607885,RIC1,PEBP4,HOXD1,POLR1E,CASP8,CCDC25,GLRA3,DLX2,RIF1,BAG1,LOC101114849,HR,LOC1…
2	198562801	198563800	32052994	207432142	Milk protein percentage QTL (57738)	GORASP2,RASEF,LOC106990930,WDR33,NPM2,XPO7,PIP5K1B,LOC101112634,NMRK1,RAB3GAP1,CCAR2,LOC106990932,KIAA2012,LOC105611679,RHOBTB2,LOC101121497,CEP44,LOC105609145,LOC106990539,LOC105609818,LOC101109865,POLR2D,LOC101102375,LOC101111773,LOC105611746,CWC22,GNRH1,HNRNPK,LOC101123012,MSTN,LOC101115858,LOC101106395,LOC105607885,RIC1,PEBP4,HOXD1,POLR1E,CASP8,CCDC25,GLRA3,DLX2,RIF1,BAG1,LOC101114849,HR,LOC1…
2	199454601	199455600	32052994	207432142	Milk protein percentage QTL (57738)	GORASP2,RASEF,LOC106990930,WDR33,NPM2,XPO7,PIP5K1B,LOC101112634,NMRK1,RAB3GAP1,CCAR2,LOC106990932,KIAA2012,LOC105611679,RHOBTB2,LOC101121497,CEP44,LOC105609145,LOC106990539,LOC105609818,LOC101109865,POLR2D,LOC101102375,LOC101111773,LOC105611746,CWC22,GNRH1,HNRNPK,LOC101123012,MSTN,LOC101115858,LOC101106395,LOC105607885,RIC1,PEBP4,HOXD1,POLR1E,CASP8,CCDC25,GLRA3,DLX2,RIF1,BAG1,LOC101114849,HR,LOC1…
2	199826201	199827900	32052994	207432142	Milk protein percentage QTL (57738)	GORASP2,RASEF,LOC106990930,WDR33,NPM2,XPO7,PIP5K1B,LOC101112634,NMRK1,RAB3GAP1,CCAR2,LOC106990932,KIAA2012,LOC105611679,RHOBTB2,LOC101121497,CEP44,LOC105609145,LOC106990539,LOC105609818,LOC101109865,POLR2D,LOC101102375,LOC101111773,LOC105611746,CWC22,GNRH1,HNRNPK,LOC101123012,MSTN,LOC101115858,LOC101106395,LOC105607885,RIC1,PEBP4,HOXD1,POLR1E,CASP8,CCDC25,GLRA3,DLX2,RIF1,BAG1,LOC101114849,HR,LOC1…
2	199897201	199898400	32052994	207432142	Milk protein percentage QTL (57738)	GORASP2,RASEF,LOC106990930,WDR33,NPM2,XPO7,PIP5K1B,LOC101112634,NMRK1,RAB3GAP1,CCAR2,LOC106990932,KIAA2012,LOC105611679,RHOBTB2,LOC101121497,CEP44,LOC105609145,LOC106990539,LOC105609818,LOC101109865,POLR2D,LOC101102375,LOC101111773,LOC105611746,CWC22,GNRH1,HNRNPK,LOC101123012,MSTN,LOC101115858,LOC101106395,LOC105607885,RIC1,PEBP4,HOXD1,POLR1E,CASP8,CCDC25,GLRA3,DLX2,RIF1,BAG1,LOC101114849,HR,LOC1…
2	199939501	199941800	32052994	207432142	Milk protein percentage QTL (57738)	GORASP2,RASEF,LOC106990930,WDR33,NPM2,XPO7,PIP5K1B,LOC101112634,NMRK1,RAB3GAP1,CCAR2,LOC106990932,KIAA2012,LOC105611679,RHOBTB2,LOC101121497,CEP44,LOC105609145,LOC106990539,LOC105609818,LOC101109865,POLR2D,LOC101102375,LOC101111773,LOC105611746,CWC22,GNRH1,HNRNPK,LOC101123012,MSTN,LOC101115858,LOC101106395,LOC105607885,RIC1,PEBP4,HOXD1,POLR1E,CASP8,CCDC25,GLRA3,DLX2,RIF1,BAG1,LOC101114849,HR,LOC1…
2	199954601	199959700	32052994	207432142	Milk protein percentage QTL (57738)	GORASP2,RASEF,LOC106990930,WDR33,NPM2,XPO7,PIP5K1B,LOC101112634,NMRK1,RAB3GAP1,CCAR2,LOC106990932,KIAA2012,LOC105611679,RHOBTB2,LOC101121497,CEP44,LOC105609145,LOC106990539,LOC105609818,LOC101109865,POLR2D,LOC101102375,LOC101111773,LOC105611746,CWC22,GNRH1,HNRNPK,LOC101123012,MSTN,LOC101115858,LOC101106395,LOC105607885,RIC1,PEBP4,HOXD1,POLR1E,CASP8,CCDC25,GLRA3,DLX2,RIF1,BAG1,LOC101114849,HR,LOC1…
2	200241401	200242700	32052994	207432142	Milk protein percentage QTL (57738)	GORASP2,RASEF,LOC106990930,WDR33,NPM2,XPO7,PIP5K1B,LOC101112634,NMRK1,RAB3GAP1,CCAR2,LOC106990932,KIAA2012,LOC105611679,RHOBTB2,LOC101121497,CEP44,LOC105609145,LOC106990539,LOC105609818,LOC101109865,POLR2D,LOC101102375,LOC101111773,LOC105611746,CWC22,GNRH1,HNRNPK,LOC101123012,MSTN,LOC101115858,LOC101106395,LOC105607885,RIC1,PEBP4,HOXD1,POLR1E,CASP8,CCDC25,GLRA3,DLX2,RIF1,BAG1,LOC101114849,HR,LOC1…
2	201087801	201089000	32052994	207432142	Milk protein percentage QTL (57738)	GORASP2,RASEF,LOC106990930,WDR33,NPM2,XPO7,PIP5K1B,LOC101112634,NMRK1,RAB3GAP1,CCAR2,LOC106990932,KIAA2012,LOC105611679,RHOBTB2,LOC101121497,CEP44,LOC105609145,LOC106990539,LOC105609818,LOC101109865,POLR2D,LOC101102375,LOC101111773,LOC105611746,CWC22,GNRH1,HNRNPK,LOC101123012,MSTN,LOC101115858,LOC101106395,LOC105607885,RIC1,PEBP4,HOXD1,POLR1E,CASP8,CCDC25,GLRA3,DLX2,RIF1,BAG1,LOC101114849,HR,LOC1…
2	201519001	201520200	32052994	207432142	Milk protein percentage QTL (57738)	GORASP2,RASEF,LOC106990930,WDR33,NPM2,XPO7,PIP5K1B,LOC101112634,NMRK1,RAB3GAP1,CCAR2,LOC106990932,KIAA2012,LOC105611679,RHOBTB2,LOC101121497,CEP44,LOC105609145,LOC106990539,LOC105609818,LOC101109865,POLR2D,LOC101102375,LOC101111773,LOC105611746,CWC22,GNRH1,HNRNPK,LOC101123012,MSTN,LOC101115858,LOC101106395,LOC105607885,RIC1,PEBP4,HOXD1,POLR1E,CASP8,CCDC25,GLRA3,DLX2,RIF1,BAG1,LOC101114849,HR,LOC1…
2	202028701	202030100	32052994	207432142	Milk protein percentage QTL (57738)	GORASP2,RASEF,LOC106990930,WDR33,NPM2,XPO7,PIP5K1B,LOC101112634,NMRK1,RAB3GAP1,CCAR2,LOC106990932,KIAA2012,LOC105611679,RHOBTB2,LOC101121497,CEP44,LOC105609145,LOC106990539,LOC105609818,LOC101109865,POLR2D,LOC101102375,LOC101111773,LOC105611746,CWC22,GNRH1,HNRNPK,LOC101123012,MSTN,LOC101115858,LOC101106395,LOC105607885,RIC1,PEBP4,HOXD1,POLR1E,CASP8,CCDC25,GLRA3,DLX2,RIF1,BAG1,LOC101114849,HR,LOC1…
2	202594701	202595700	32052994	207432142	Milk protein percentage QTL (57738)	GORASP2,RASEF,LOC106990930,WDR33,NPM2,XPO7,PIP5K1B,LOC101112634,NMRK1,RAB3GAP1,CCAR2,LOC106990932,KIAA2012,LOC105611679,RHOBTB2,LOC101121497,CEP44,LOC105609145,LOC106990539,LOC105609818,LOC101109865,POLR2D,LOC101102375,LOC101111773,LOC105611746,CWC22,GNRH1,HNRNPK,LOC101123012,MSTN,LOC101115858,LOC101106395,LOC105607885,RIC1,PEBP4,HOXD1,POLR1E,CASP8,CCDC25,GLRA3,DLX2,RIF1,BAG1,LOC101114849,HR,LOC1…
2	203012201	203014600	32052994	207432142	Milk protein percentage QTL (57738)	GORASP2,RASEF,LOC106990930,WDR33,NPM2,XPO7,PIP5K1B,LOC101112634,NMRK1,RAB3GAP1,CCAR2,LOC106990932,KIAA2012,LOC105611679,RHOBTB2,LOC101121497,CEP44,LOC105609145,LOC106990539,LOC105609818,LOC101109865,POLR2D,LOC101102375,LOC101111773,LOC105611746,CWC22,GNRH1,HNRNPK,LOC101123012,MSTN,LOC101115858,LOC101106395,LOC105607885,RIC1,PEBP4,HOXD1,POLR1E,CASP8,CCDC25,GLRA3,DLX2,RIF1,BAG1,LOC101114849,HR,LOC1…
2	203064701	203066800	32052994	207432142	Milk protein percentage QTL (57738)	GORASP2,RASEF,LOC106990930,WDR33,NPM2,XPO7,PIP5K1B,LOC101112634,NMRK1,RAB3GAP1,CCAR2,LOC106990932,KIAA2012,LOC105611679,RHOBTB2,LOC101121497,CEP44,LOC105609145,LOC106990539,LOC105609818,LOC101109865,POLR2D,LOC101102375,LOC101111773,LOC105611746,CWC22,GNRH1,HNRNPK,LOC101123012,MSTN,LOC101115858,LOC101106395,LOC105607885,RIC1,PEBP4,HOXD1,POLR1E,CASP8,CCDC25,GLRA3,DLX2,RIF1,BAG1,LOC101114849,HR,LOC1…
2	203297401	203299300	32052994	207432142	Milk protein percentage QTL (57738)	GORASP2,RASEF,LOC106990930,WDR33,NPM2,XPO7,PIP5K1B,LOC101112634,NMRK1,RAB3GAP1,CCAR2,LOC106990932,KIAA2012,LOC105611679,RHOBTB2,LOC101121497,CEP44,LOC105609145,LOC106990539,LOC105609818,LOC101109865,POLR2D,LOC101102375,LOC101111773,LOC105611746,CWC22,GNRH1,HNRNPK,LOC101123012,MSTN,LOC101115858,LOC101106395,LOC105607885,RIC1,PEBP4,HOXD1,POLR1E,CASP8,CCDC25,GLRA3,DLX2,RIF1,BAG1,LOC101114849,HR,LOC1…
2	204360701	204361800	32052994	207432142	Milk protein percentage QTL (57738)	GORASP2,RASEF,LOC106990930,WDR33,NPM2,XPO7,PIP5K1B,LOC101112634,NMRK1,RAB3GAP1,CCAR2,LOC106990932,KIAA2012,LOC105611679,RHOBTB2,LOC101121497,CEP44,LOC105609145,LOC106990539,LOC105609818,LOC101109865,POLR2D,LOC101102375,LOC101111773,LOC105611746,CWC22,GNRH1,HNRNPK,LOC101123012,MSTN,LOC101115858,LOC101106395,LOC105607885,RIC1,PEBP4,HOXD1,POLR1E,CASP8,CCDC25,GLRA3,DLX2,RIF1,BAG1,LOC101114849,HR,LOC1…
2	204530801	204531800	32052994	207432142	Milk protein percentage QTL (57738)	GORASP2,RASEF,LOC106990930,WDR33,NPM2,XPO7,PIP5K1B,LOC101112634,NMRK1,RAB3GAP1,CCAR2,LOC106990932,KIAA2012,LOC105611679,RHOBTB2,LOC101121497,CEP44,LOC105609145,LOC106990539,LOC105609818,LOC101109865,POLR2D,LOC101102375,LOC101111773,LOC105611746,CWC22,GNRH1,HNRNPK,LOC101123012,MSTN,LOC101115858,LOC101106395,LOC105607885,RIC1,PEBP4,HOXD1,POLR1E,CASP8,CCDC25,GLRA3,DLX2,RIF1,BAG1,LOC101114849,HR,LOC1…
2	204533501	204538600	32052994	207432142	Milk protein percentage QTL (57738)	GORASP2,RASEF,LOC106990930,WDR33,NPM2,XPO7,PIP5K1B,LOC101112634,NMRK1,RAB3GAP1,CCAR2,LOC106990932,KIAA2012,LOC105611679,RHOBTB2,LOC101121497,CEP44,LOC105609145,LOC106990539,LOC105609818,LOC101109865,POLR2D,LOC101102375,LOC101111773,LOC105611746,CWC22,GNRH1,HNRNPK,LOC101123012,MSTN,LOC101115858,LOC101106395,LOC105607885,RIC1,PEBP4,HOXD1,POLR1E,CASP8,CCDC25,GLRA3,DLX2,RIF1,BAG1,LOC101114849,HR,LOC1…
2	205402801	205404500	32052994	207432142	Milk protein percentage QTL (57738)	GORASP2,RASEF,LOC106990930,WDR33,NPM2,XPO7,PIP5K1B,LOC101112634,NMRK1,RAB3GAP1,CCAR2,LOC106990932,KIAA2012,LOC105611679,RHOBTB2,LOC101121497,CEP44,LOC105609145,LOC106990539,LOC105609818,LOC101109865,POLR2D,LOC101102375,LOC101111773,LOC105611746,CWC22,GNRH1,HNRNPK,LOC101123012,MSTN,LOC101115858,LOC101106395,LOC105607885,RIC1,PEBP4,HOXD1,POLR1E,CASP8,CCDC25,GLRA3,DLX2,RIF1,BAG1,LOC101114849,HR,LOC1…
2	205960701	205961800	32052994	207432142	Milk protein percentage QTL (57738)	GORASP2,RASEF,LOC106990930,WDR33,NPM2,XPO7,PIP5K1B,LOC101112634,NMRK1,RAB3GAP1,CCAR2,LOC106990932,KIAA2012,LOC105611679,RHOBTB2,LOC101121497,CEP44,LOC105609145,LOC106990539,LOC105609818,LOC101109865,POLR2D,LOC101102375,LOC101111773,LOC105611746,CWC22,GNRH1,HNRNPK,LOC101123012,MSTN,LOC101115858,LOC101106395,LOC105607885,RIC1,PEBP4,HOXD1,POLR1E,CASP8,CCDC25,GLRA3,DLX2,RIF1,BAG1,LOC101114849,HR,LOC1…
2	206233601	206235500	32052994	207432142	Milk protein percentage QTL (57738)	GORASP2,RASEF,LOC106990930,WDR33,NPM2,XPO7,PIP5K1B,LOC101112634,NMRK1,RAB3GAP1,CCAR2,LOC106990932,KIAA2012,LOC105611679,RHOBTB2,LOC101121497,CEP44,LOC105609145,LOC106990539,LOC105609818,LOC101109865,POLR2D,LOC101102375,LOC101111773,LOC105611746,CWC22,GNRH1,HNRNPK,LOC101123012,MSTN,LOC101115858,LOC101106395,LOC105607885,RIC1,PEBP4,HOXD1,POLR1E,CASP8,CCDC25,GLRA3,DLX2,RIF1,BAG1,LOC101114849,HR,LOC1…
2	206738001	206743100	32052994	207432142	Milk protein percentage QTL (57738)	GORASP2,RASEF,LOC106990930,WDR33,NPM2,XPO7,PIP5K1B,LOC101112634,NMRK1,RAB3GAP1,CCAR2,LOC106990932,KIAA2012,LOC105611679,RHOBTB2,LOC101121497,CEP44,LOC105609145,LOC106990539,LOC105609818,LOC101109865,POLR2D,LOC101102375,LOC101111773,LOC105611746,CWC22,GNRH1,HNRNPK,LOC101123012,MSTN,LOC101115858,LOC101106395,LOC105607885,RIC1,PEBP4,HOXD1,POLR1E,CASP8,CCDC25,GLRA3,DLX2,RIF1,BAG1,LOC101114849,HR,LOC1…
2	233474101	233475500	233463269	233500623	Vocalization during arena test QTL (146909)	LOC105610102,ZNF362,A3GALT2
2	233478301	233479300	233463269	233500623	Vocalization during arena test QTL (146909)	LOC105610102,ZNF362,A3GALT2
3	914201	919800	900937	1096048	Vocalization during corridor test QTL (146951)	LCN6,LCN15,LOC105612340,LOC105607198,PPP1R26,C3H9orf116,LOC105607199,LOC105607196
3	919801	922900	900937	1096048	Vocalization during corridor test QTL (146951)	LCN6,LCN15,LOC105612340,LOC105607198,PPP1R26,C3H9orf116,LOC105607199,LOC105607196
3	922901	925800	900937	1096048	Vocalization during corridor test QTL (146951)	LCN6,LCN15,LOC105612340,LOC105607198,PPP1R26,C3H9orf116,LOC105607199,LOC105607196
3	925801	927300	900937	1096048	Vocalization during corridor test QTL (146951)	LCN6,LCN15,LOC105612340,LOC105607198,PPP1R26,C3H9orf116,LOC105607199,LOC105607196
3	1094501	1095800	900937	1096048	Vocalization during corridor test QTL (146951)	LCN6,LCN15,LOC105612340,LOC105607198,PPP1R26,C3H9orf116,LOC105607199,LOC105607196
3	3677001	3678300	3549406	3685280	Breech Traits QTL (146981)	LOC105607230,LOC105614895,LOC105614896,GBGT1,PAEP
3	3680901	3682100	3549406	3685280	Breech Traits QTL (146981)	LOC105607230,LOC105614895,LOC105614896,GBGT1,PAEP
3	20930701	20932600	20036946	25088783	Total fat area QTL (95834)	MYCN,TRNAS-GGA,ROCK2,LOC106991015,LOC101104307,LOC105612852,FAM49A,LOC101105319,TRIB2,TRNAC-ACA,NBAS,DDX1,GREB1,LPIN1,NTSR2,LOC105607475,TRNAW-CCA,LOC105607480,E2F6,LOC101105067,TRNAC-GCA,LOC101121840,LOC101121585
3	20969401	20970600	20036946	25088783	Total fat area QTL (95834)	MYCN,TRNAS-GGA,ROCK2,LOC106991015,LOC101104307,LOC105612852,FAM49A,LOC101105319,TRIB2,TRNAC-ACA,NBAS,DDX1,GREB1,LPIN1,NTSR2,LOC105607475,TRNAW-CCA,LOC105607480,E2F6,LOC101105067,TRNAC-GCA,LOC101121840,LOC101121585
3	21443601	21445200	20036946	25088783	Total fat area QTL (95834)	MYCN,TRNAS-GGA,ROCK2,LOC106991015,LOC101104307,LOC105612852,FAM49A,LOC101105319,TRIB2,TRNAC-ACA,NBAS,DDX1,GREB1,LPIN1,NTSR2,LOC105607475,TRNAW-CCA,LOC105607480,E2F6,LOC101105067,TRNAC-GCA,LOC101121840,LOC101121585
3	21630901	21632000	20036946	25088783	Total fat area QTL (95834)	MYCN,TRNAS-GGA,ROCK2,LOC106991015,LOC101104307,LOC105612852,FAM49A,LOC101105319,TRIB2,TRNAC-ACA,NBAS,DDX1,GREB1,LPIN1,NTSR2,LOC105607475,TRNAW-CCA,LOC105607480,E2F6,LOC101105067,TRNAC-GCA,LOC101121840,LOC101121585
3	21685101	21686500	20036946	25088783	Total fat area QTL (95834)	MYCN,TRNAS-GGA,ROCK2,LOC106991015,LOC101104307,LOC105612852,FAM49A,LOC101105319,TRIB2,TRNAC-ACA,NBAS,DDX1,GREB1,LPIN1,NTSR2,LOC105607475,TRNAW-CCA,LOC105607480,E2F6,LOC101105067,TRNAC-GCA,LOC101121840,LOC101121585
3	23406501	23407700	20036946	25088783	Total fat area QTL (95834)	MYCN,TRNAS-GGA,ROCK2,LOC106991015,LOC101104307,LOC105612852,FAM49A,LOC101105319,TRIB2,TRNAC-ACA,NBAS,DDX1,GREB1,LPIN1,NTSR2,LOC105607475,TRNAW-CCA,LOC105607480,E2F6,LOC101105067,TRNAC-GCA,LOC101121840,LOC101121585
3	24174401	24175400	20036946	25088783	Total fat area QTL (95834)	MYCN,TRNAS-GGA,ROCK2,LOC106991015,LOC101104307,LOC105612852,FAM49A,LOC101105319,TRIB2,TRNAC-ACA,NBAS,DDX1,GREB1,LPIN1,NTSR2,LOC105607475,TRNAW-CCA,LOC105607480,E2F6,LOC101105067,TRNAC-GCA,LOC101121840,LOC101121585
3	24337001	24338000	20036946	25088783	Total fat area QTL (95834)	MYCN,TRNAS-GGA,ROCK2,LOC106991015,LOC101104307,LOC105612852,FAM49A,LOC101105319,TRIB2,TRNAC-ACA,NBAS,DDX1,GREB1,LPIN1,NTSR2,LOC105607475,TRNAW-CCA,LOC105607480,E2F6,LOC101105067,TRNAC-GCA,LOC101121840,LOC101121585
3	24747501	24748700	20036946	25088783	Total fat area QTL (95834)	MYCN,TRNAS-GGA,ROCK2,LOC106991015,LOC101104307,LOC105612852,FAM49A,LOC101105319,TRIB2,TRNAC-ACA,NBAS,DDX1,GREB1,LPIN1,NTSR2,LOC105607475,TRNAW-CCA,LOC105607480,E2F6,LOC101105067,TRNAC-GCA,LOC101121840,LOC101121585
3	38295001	38296100	37086302	42997357	Tail fat deposition QTL (126987)	SNRNP27,WDR92,ANTXR1,C1D,TRNAS-GGA,LOC105613207,TRNAE-UUC,PROKR1,C3H2orf42,CAPN14,LOC101116390,EHD3,TRNAG-CCC,PCBP1,ACTR2,GFPT1,FBXO48,LCLAT1,SNRPG,TRNAC-ACA,GALNT14,PLEK,ARHGAP25,GKN2,LOC105610458,MXD1,LOC106991043,LOC106991044,LOC101108901,ETAA1,BMP10,TIA1,LOC106991045,LOC106991046,LOC105613198,GKN1,MEIS1,GMCL1,NFU1,LOC101116135,ASPRV1,LOC101117153,LOC101113219,APLF,SPRED2,CAPN13,LOC106991047,L…
3	38678401	38679500	37086302	42997357	Tail fat deposition QTL (126987)	SNRNP27,WDR92,ANTXR1,C1D,TRNAS-GGA,LOC105613207,TRNAE-UUC,PROKR1,C3H2orf42,CAPN14,LOC101116390,EHD3,TRNAG-CCC,PCBP1,ACTR2,GFPT1,FBXO48,LCLAT1,SNRPG,TRNAC-ACA,GALNT14,PLEK,ARHGAP25,GKN2,LOC105610458,MXD1,LOC106991043,LOC106991044,LOC101108901,ETAA1,BMP10,TIA1,LOC106991045,LOC106991046,LOC105613198,GKN1,MEIS1,GMCL1,NFU1,LOC101116135,ASPRV1,LOC101117153,LOC101113219,APLF,SPRED2,CAPN13,LOC106991047,L…
3	38694701	38698700	37086302	42997357	Tail fat deposition QTL (126987)	SNRNP27,WDR92,ANTXR1,C1D,TRNAS-GGA,LOC105613207,TRNAE-UUC,PROKR1,C3H2orf42,CAPN14,LOC101116390,EHD3,TRNAG-CCC,PCBP1,ACTR2,GFPT1,FBXO48,LCLAT1,SNRPG,TRNAC-ACA,GALNT14,PLEK,ARHGAP25,GKN2,LOC105610458,MXD1,LOC106991043,LOC106991044,LOC101108901,ETAA1,BMP10,TIA1,LOC106991045,LOC106991046,LOC105613198,GKN1,MEIS1,GMCL1,NFU1,LOC101116135,ASPRV1,LOC101117153,LOC101113219,APLF,SPRED2,CAPN13,LOC106991047,L…
3	39186701	39195400	37086302	42997357	Tail fat deposition QTL (126987)	SNRNP27,WDR92,ANTXR1,C1D,TRNAS-GGA,LOC105613207,TRNAE-UUC,PROKR1,C3H2orf42,CAPN14,LOC101116390,EHD3,TRNAG-CCC,PCBP1,ACTR2,GFPT1,FBXO48,LCLAT1,SNRPG,TRNAC-ACA,GALNT14,PLEK,ARHGAP25,GKN2,LOC105610458,MXD1,LOC106991043,LOC106991044,LOC101108901,ETAA1,BMP10,TIA1,LOC106991045,LOC106991046,LOC105613198,GKN1,MEIS1,GMCL1,NFU1,LOC101116135,ASPRV1,LOC101117153,LOC101113219,APLF,SPRED2,CAPN13,LOC106991047,L…
3	39625301	39626300	37086302	42997357	Tail fat deposition QTL (126987)	SNRNP27,WDR92,ANTXR1,C1D,TRNAS-GGA,LOC105613207,TRNAE-UUC,PROKR1,C3H2orf42,CAPN14,LOC101116390,EHD3,TRNAG-CCC,PCBP1,ACTR2,GFPT1,FBXO48,LCLAT1,SNRPG,TRNAC-ACA,GALNT14,PLEK,ARHGAP25,GKN2,LOC105610458,MXD1,LOC106991043,LOC106991044,LOC101108901,ETAA1,BMP10,TIA1,LOC106991045,LOC106991046,LOC105613198,GKN1,MEIS1,GMCL1,NFU1,LOC101116135,ASPRV1,LOC101117153,LOC101113219,APLF,SPRED2,CAPN13,LOC106991047,L…
3	39642301	39643300	37086302	42997357	Tail fat deposition QTL (126987)	SNRNP27,WDR92,ANTXR1,C1D,TRNAS-GGA,LOC105613207,TRNAE-UUC,PROKR1,C3H2orf42,CAPN14,LOC101116390,EHD3,TRNAG-CCC,PCBP1,ACTR2,GFPT1,FBXO48,LCLAT1,SNRPG,TRNAC-ACA,GALNT14,PLEK,ARHGAP25,GKN2,LOC105610458,MXD1,LOC106991043,LOC106991044,LOC101108901,ETAA1,BMP10,TIA1,LOC106991045,LOC106991046,LOC105613198,GKN1,MEIS1,GMCL1,NFU1,LOC101116135,ASPRV1,LOC101117153,LOC101113219,APLF,SPRED2,CAPN13,LOC106991047,L…
3	39680801	39683600	37086302	42997357	Tail fat deposition QTL (126987)	SNRNP27,WDR92,ANTXR1,C1D,TRNAS-GGA,LOC105613207,TRNAE-UUC,PROKR1,C3H2orf42,CAPN14,LOC101116390,EHD3,TRNAG-CCC,PCBP1,ACTR2,GFPT1,FBXO48,LCLAT1,SNRPG,TRNAC-ACA,GALNT14,PLEK,ARHGAP25,GKN2,LOC105610458,MXD1,LOC106991043,LOC106991044,LOC101108901,ETAA1,BMP10,TIA1,LOC106991045,LOC106991046,LOC105613198,GKN1,MEIS1,GMCL1,NFU1,LOC101116135,ASPRV1,LOC101117153,LOC101113219,APLF,SPRED2,CAPN13,LOC106991047,L…
3	40362001	40363400	37086302	42997357	Tail fat deposition QTL (126987)	SNRNP27,WDR92,ANTXR1,C1D,TRNAS-GGA,LOC105613207,TRNAE-UUC,PROKR1,C3H2orf42,CAPN14,LOC101116390,EHD3,TRNAG-CCC,PCBP1,ACTR2,GFPT1,FBXO48,LCLAT1,SNRPG,TRNAC-ACA,GALNT14,PLEK,ARHGAP25,GKN2,LOC105610458,MXD1,LOC106991043,LOC106991044,LOC101108901,ETAA1,BMP10,TIA1,LOC106991045,LOC106991046,LOC105613198,GKN1,MEIS1,GMCL1,NFU1,LOC101116135,ASPRV1,LOC101117153,LOC101113219,APLF,SPRED2,CAPN13,LOC106991047,L…
3	40940801	40942400	37086302	42997357	Tail fat deposition QTL (126987)	SNRNP27,WDR92,ANTXR1,C1D,TRNAS-GGA,LOC105613207,TRNAE-UUC,PROKR1,C3H2orf42,CAPN14,LOC101116390,EHD3,TRNAG-CCC,PCBP1,ACTR2,GFPT1,FBXO48,LCLAT1,SNRPG,TRNAC-ACA,GALNT14,PLEK,ARHGAP25,GKN2,LOC105610458,MXD1,LOC106991043,LOC106991044,LOC101108901,ETAA1,BMP10,TIA1,LOC106991045,LOC106991046,LOC105613198,GKN1,MEIS1,GMCL1,NFU1,LOC101116135,ASPRV1,LOC101117153,LOC101113219,APLF,SPRED2,CAPN13,LOC106991047,L…
3	41191001	41192300	37086302	42997357	Tail fat deposition QTL (126987)	SNRNP27,WDR92,ANTXR1,C1D,TRNAS-GGA,LOC105613207,TRNAE-UUC,PROKR1,C3H2orf42,CAPN14,LOC101116390,EHD3,TRNAG-CCC,PCBP1,ACTR2,GFPT1,FBXO48,LCLAT1,SNRPG,TRNAC-ACA,GALNT14,PLEK,ARHGAP25,GKN2,LOC105610458,MXD1,LOC106991043,LOC106991044,LOC101108901,ETAA1,BMP10,TIA1,LOC106991045,LOC106991046,LOC105613198,GKN1,MEIS1,GMCL1,NFU1,LOC101116135,ASPRV1,LOC101117153,LOC101113219,APLF,SPRED2,CAPN13,LOC106991047,L…
3	41236601	41239500	37086302	42997357	Tail fat deposition QTL (126987)	SNRNP27,WDR92,ANTXR1,C1D,TRNAS-GGA,LOC105613207,TRNAE-UUC,PROKR1,C3H2orf42,CAPN14,LOC101116390,EHD3,TRNAG-CCC,PCBP1,ACTR2,GFPT1,FBXO48,LCLAT1,SNRPG,TRNAC-ACA,GALNT14,PLEK,ARHGAP25,GKN2,LOC105610458,MXD1,LOC106991043,LOC106991044,LOC101108901,ETAA1,BMP10,TIA1,LOC106991045,LOC106991046,LOC105613198,GKN1,MEIS1,GMCL1,NFU1,LOC101116135,ASPRV1,LOC101117153,LOC101113219,APLF,SPRED2,CAPN13,LOC106991047,L…
3	61936701	61937900	61717057	66655886	bone density QTL (95815)	FANCL,BCL11A,LOC101117064,RANBP2,PAPOLG,SH3RF3,KIAA1841,LOC101111184,MRPL19,VRK2,LIMS1,LOC105606430,LOC101111446,REL,EVA1A,LOC105606437,LOC101110669,LOC101117318,PUS10,CCDC138,EDAR,LOC105612569,GCFC2,SOWAHC,LOC105613763,LOC105613726,TRNAC-GCA,LOC106991019,SEPT10,LOC105612568,PEX13
3	61982801	61988800	61717057	66655886	bone density QTL (95815)	FANCL,BCL11A,LOC101117064,RANBP2,PAPOLG,SH3RF3,KIAA1841,LOC101111184,MRPL19,VRK2,LIMS1,LOC105606430,LOC101111446,REL,EVA1A,LOC105606437,LOC101110669,LOC101117318,PUS10,CCDC138,EDAR,LOC105612569,GCFC2,SOWAHC,LOC105613763,LOC105613726,TRNAC-GCA,LOC106991019,SEPT10,LOC105612568,PEX13
3	62049301	62050300	61717057	66655886	bone density QTL (95815)	FANCL,BCL11A,LOC101117064,RANBP2,PAPOLG,SH3RF3,KIAA1841,LOC101111184,MRPL19,VRK2,LIMS1,LOC105606430,LOC101111446,REL,EVA1A,LOC105606437,LOC101110669,LOC101117318,PUS10,CCDC138,EDAR,LOC105612569,GCFC2,SOWAHC,LOC105613763,LOC105613726,TRNAC-GCA,LOC106991019,SEPT10,LOC105612568,PEX13
3	62394101	62395400	61717057	66655886	bone density QTL (95815)	FANCL,BCL11A,LOC101117064,RANBP2,PAPOLG,SH3RF3,KIAA1841,LOC101111184,MRPL19,VRK2,LIMS1,LOC105606430,LOC101111446,REL,EVA1A,LOC105606437,LOC101110669,LOC101117318,PUS10,CCDC138,EDAR,LOC105612569,GCFC2,SOWAHC,LOC105613763,LOC105613726,TRNAC-GCA,LOC106991019,SEPT10,LOC105612568,PEX13
3	62400401	62401700	61717057	66655886	bone density QTL (95815)	FANCL,BCL11A,LOC101117064,RANBP2,PAPOLG,SH3RF3,KIAA1841,LOC101111184,MRPL19,VRK2,LIMS1,LOC105606430,LOC101111446,REL,EVA1A,LOC105606437,LOC101110669,LOC101117318,PUS10,CCDC138,EDAR,LOC105612569,GCFC2,SOWAHC,LOC105613763,LOC105613726,TRNAC-GCA,LOC106991019,SEPT10,LOC105612568,PEX13
3	62429601	62431000	61717057	66655886	bone density QTL (95815)	FANCL,BCL11A,LOC101117064,RANBP2,PAPOLG,SH3RF3,KIAA1841,LOC101111184,MRPL19,VRK2,LIMS1,LOC105606430,LOC101111446,REL,EVA1A,LOC105606437,LOC101110669,LOC101117318,PUS10,CCDC138,EDAR,LOC105612569,GCFC2,SOWAHC,LOC105613763,LOC105613726,TRNAC-GCA,LOC106991019,SEPT10,LOC105612568,PEX13
3	62869001	62874100	61717057	66655886	bone density QTL (95815)	FANCL,BCL11A,LOC101117064,RANBP2,PAPOLG,SH3RF3,KIAA1841,LOC101111184,MRPL19,VRK2,LIMS1,LOC105606430,LOC101111446,REL,EVA1A,LOC105606437,LOC101110669,LOC101117318,PUS10,CCDC138,EDAR,LOC105612569,GCFC2,SOWAHC,LOC105613763,LOC105613726,TRNAC-GCA,LOC106991019,SEPT10,LOC105612568,PEX13
3	62902501	62905700	61717057	66655886	bone density QTL (95815)	FANCL,BCL11A,LOC101117064,RANBP2,PAPOLG,SH3RF3,KIAA1841,LOC101111184,MRPL19,VRK2,LIMS1,LOC105606430,LOC101111446,REL,EVA1A,LOC105606437,LOC101110669,LOC101117318,PUS10,CCDC138,EDAR,LOC105612569,GCFC2,SOWAHC,LOC105613763,LOC105613726,TRNAC-GCA,LOC106991019,SEPT10,LOC105612568,PEX13
3	62913101	62914900	61717057	66655886	bone density QTL (95815)	FANCL,BCL11A,LOC101117064,RANBP2,PAPOLG,SH3RF3,KIAA1841,LOC101111184,MRPL19,VRK2,LIMS1,LOC105606430,LOC101111446,REL,EVA1A,LOC105606437,LOC101110669,LOC101117318,PUS10,CCDC138,EDAR,LOC105612569,GCFC2,SOWAHC,LOC105613763,LOC105613726,TRNAC-GCA,LOC106991019,SEPT10,LOC105612568,PEX13
3	63045501	63046800	61717057	66655886	bone density QTL (95815)	FANCL,BCL11A,LOC101117064,RANBP2,PAPOLG,SH3RF3,KIAA1841,LOC101111184,MRPL19,VRK2,LIMS1,LOC105606430,LOC101111446,REL,EVA1A,LOC105606437,LOC101110669,LOC101117318,PUS10,CCDC138,EDAR,LOC105612569,GCFC2,SOWAHC,LOC105613763,LOC105613726,TRNAC-GCA,LOC106991019,SEPT10,LOC105612568,PEX13
3	63631501	63634300	61717057	66655886	bone density QTL (95815)	FANCL,BCL11A,LOC101117064,RANBP2,PAPOLG,SH3RF3,KIAA1841,LOC101111184,MRPL19,VRK2,LIMS1,LOC105606430,LOC101111446,REL,EVA1A,LOC105606437,LOC101110669,LOC101117318,PUS10,CCDC138,EDAR,LOC105612569,GCFC2,SOWAHC,LOC105613763,LOC105613726,TRNAC-GCA,LOC106991019,SEPT10,LOC105612568,PEX13
3	64458201	64459300	61717057	66655886	bone density QTL (95815)	FANCL,BCL11A,LOC101117064,RANBP2,PAPOLG,SH3RF3,KIAA1841,LOC101111184,MRPL19,VRK2,LIMS1,LOC105606430,LOC101111446,REL,EVA1A,LOC105606437,LOC101110669,LOC101117318,PUS10,CCDC138,EDAR,LOC105612569,GCFC2,SOWAHC,LOC105613763,LOC105613726,TRNAC-GCA,LOC106991019,SEPT10,LOC105612568,PEX13
3	65166701	65167900	61717057	66655886	bone density QTL (95815)	FANCL,BCL11A,LOC101117064,RANBP2,PAPOLG,SH3RF3,KIAA1841,LOC101111184,MRPL19,VRK2,LIMS1,LOC105606430,LOC101111446,REL,EVA1A,LOC105606437,LOC101110669,LOC101117318,PUS10,CCDC138,EDAR,LOC105612569,GCFC2,SOWAHC,LOC105613763,LOC105613726,TRNAC-GCA,LOC106991019,SEPT10,LOC105612568,PEX13
3	65602901	65604300	61717057	66655886	bone density QTL (95815)	FANCL,BCL11A,LOC101117064,RANBP2,PAPOLG,SH3RF3,KIAA1841,LOC101111184,MRPL19,VRK2,LIMS1,LOC105606430,LOC101111446,REL,EVA1A,LOC105606437,LOC101110669,LOC101117318,PUS10,CCDC138,EDAR,LOC105612569,GCFC2,SOWAHC,LOC105613763,LOC105613726,TRNAC-GCA,LOC106991019,SEPT10,LOC105612568,PEX13
3	65733501	65734600	61717057	66655886	bone density QTL (95815)	FANCL,BCL11A,LOC101117064,RANBP2,PAPOLG,SH3RF3,KIAA1841,LOC101111184,MRPL19,VRK2,LIMS1,LOC105606430,LOC101111446,REL,EVA1A,LOC105606437,LOC101110669,LOC101117318,PUS10,CCDC138,EDAR,LOC105612569,GCFC2,SOWAHC,LOC105613763,LOC105613726,TRNAC-GCA,LOC106991019,SEPT10,LOC105612568,PEX13
3	65769001	65771400	61717057	66655886	bone density QTL (95815)	FANCL,BCL11A,LOC101117064,RANBP2,PAPOLG,SH3RF3,KIAA1841,LOC101111184,MRPL19,VRK2,LIMS1,LOC105606430,LOC101111446,REL,EVA1A,LOC105606437,LOC101110669,LOC101117318,PUS10,CCDC138,EDAR,LOC105612569,GCFC2,SOWAHC,LOC105613763,LOC105613726,TRNAC-GCA,LOC106991019,SEPT10,LOC105612568,PEX13
3	65850001	65851000	61717057	66655886	bone density QTL (95815)	FANCL,BCL11A,LOC101117064,RANBP2,PAPOLG,SH3RF3,KIAA1841,LOC101111184,MRPL19,VRK2,LIMS1,LOC105606430,LOC101111446,REL,EVA1A,LOC105606437,LOC101110669,LOC101117318,PUS10,CCDC138,EDAR,LOC105612569,GCFC2,SOWAHC,LOC105613763,LOC105613726,TRNAC-GCA,LOC106991019,SEPT10,LOC105612568,PEX13
3	67169601	67171300	64324212	69593154	bone density QTL (95811)	FANCL,EML6,EFEMP1,TRNAE-UUC,RTN4,LOC106991052,LOC101122262,LOC105613774,VRK2,LOC106990985,PNPT1,TSPYL6,MTIF2,LOC105613776,LOC101111446,SPTBN1,CFAP36,ACYP2,LOC105612569,CCDC88A,CLHC1,LOC105613763,RPS27A,LOC101120154,PPP4R3B,LOC105608757,LOC106991051,C3H2orf73,LOC105612568,CCDC85A
3	67268501	67269500	64324212	69593154	bone density QTL (95811)	FANCL,EML6,EFEMP1,TRNAE-UUC,RTN4,LOC106991052,LOC101122262,LOC105613774,VRK2,LOC106990985,PNPT1,TSPYL6,MTIF2,LOC105613776,LOC101111446,SPTBN1,CFAP36,ACYP2,LOC105612569,CCDC88A,CLHC1,LOC105613763,RPS27A,LOC101120154,PPP4R3B,LOC105608757,LOC106991051,C3H2orf73,LOC105612568,CCDC85A
3	67322601	67324000	64324212	69593154	bone density QTL (95811)	FANCL,EML6,EFEMP1,TRNAE-UUC,RTN4,LOC106991052,LOC101122262,LOC105613774,VRK2,LOC106990985,PNPT1,TSPYL6,MTIF2,LOC105613776,LOC101111446,SPTBN1,CFAP36,ACYP2,LOC105612569,CCDC88A,CLHC1,LOC105613763,RPS27A,LOC101120154,PPP4R3B,LOC105608757,LOC106991051,C3H2orf73,LOC105612568,CCDC85A
3	67766201	67767400	64324212	69593154	bone density QTL (95811)	FANCL,EML6,EFEMP1,TRNAE-UUC,RTN4,LOC106991052,LOC101122262,LOC105613774,VRK2,LOC106990985,PNPT1,TSPYL6,MTIF2,LOC105613776,LOC101111446,SPTBN1,CFAP36,ACYP2,LOC105612569,CCDC88A,CLHC1,LOC105613763,RPS27A,LOC101120154,PPP4R3B,LOC105608757,LOC106991051,C3H2orf73,LOC105612568,CCDC85A
3	68471801	68473000	64324212	69593154	bone density QTL (95811)	FANCL,EML6,EFEMP1,TRNAE-UUC,RTN4,LOC106991052,LOC101122262,LOC105613774,VRK2,LOC106990985,PNPT1,TSPYL6,MTIF2,LOC105613776,LOC101111446,SPTBN1,CFAP36,ACYP2,LOC105612569,CCDC88A,CLHC1,LOC105613763,RPS27A,LOC101120154,PPP4R3B,LOC105608757,LOC106991051,C3H2orf73,LOC105612568,CCDC85A
3	68736601	68738000	64324212	69593154	bone density QTL (95811)	FANCL,EML6,EFEMP1,TRNAE-UUC,RTN4,LOC106991052,LOC101122262,LOC105613774,VRK2,LOC106990985,PNPT1,TSPYL6,MTIF2,LOC105613776,LOC101111446,SPTBN1,CFAP36,ACYP2,LOC105612569,CCDC88A,CLHC1,LOC105613763,RPS27A,LOC101120154,PPP4R3B,LOC105608757,LOC106991051,C3H2orf73,LOC105612568,CCDC85A
3	68926101	68927100	64324212	69593154	bone density QTL (95811)	FANCL,EML6,EFEMP1,TRNAE-UUC,RTN4,LOC106991052,LOC101122262,LOC105613774,VRK2,LOC106990985,PNPT1,TSPYL6,MTIF2,LOC105613776,LOC101111446,SPTBN1,CFAP36,ACYP2,LOC105612569,CCDC88A,CLHC1,LOC105613763,RPS27A,LOC101120154,PPP4R3B,LOC105608757,LOC106991051,C3H2orf73,LOC105612568,CCDC85A
3	69055301	69059800	64324212	69593154	bone density QTL (95811)	FANCL,EML6,EFEMP1,TRNAE-UUC,RTN4,LOC106991052,LOC101122262,LOC105613774,VRK2,LOC106990985,PNPT1,TSPYL6,MTIF2,LOC105613776,LOC101111446,SPTBN1,CFAP36,ACYP2,LOC105612569,CCDC88A,CLHC1,LOC105613763,RPS27A,LOC101120154,PPP4R3B,LOC105608757,LOC106991051,C3H2orf73,LOC105612568,CCDC85A
3	69841001	69842700	66751036	71911412	bone density QTL (95812)	EML6,LOC105613853,EFEMP1,TRNAE-UUC,RTN4,LOC106991052,LOC101122262,LOC105613774,LOC105613445,LOC106990985,PNPT1,TSPYL6,MTIF2,LOC105613776,SPTBN1,ASB3,CFAP36,ACYP2,CHAC2,CCDC88A,CLHC1,RPS27A,LOC101120154,ERLEC1,PPP4R3B,LOC105608757,LOC106991051,PSME4,C3H2orf73,LOC101112474,LOC106990597,GPR75,CCDC85A
3	69854801	69856100	66751036	71911412	bone density QTL (95812)	EML6,LOC105613853,EFEMP1,TRNAE-UUC,RTN4,LOC106991052,LOC101122262,LOC105613774,LOC105613445,LOC106990985,PNPT1,TSPYL6,MTIF2,LOC105613776,SPTBN1,ASB3,CFAP36,ACYP2,CHAC2,CCDC88A,CLHC1,RPS27A,LOC101120154,ERLEC1,PPP4R3B,LOC105608757,LOC106991051,PSME4,C3H2orf73,LOC101112474,LOC106990597,GPR75,CCDC85A
3	69873401	69878400	66751036	71911412	bone density QTL (95812)	EML6,LOC105613853,EFEMP1,TRNAE-UUC,RTN4,LOC106991052,LOC101122262,LOC105613774,LOC105613445,LOC106990985,PNPT1,TSPYL6,MTIF2,LOC105613776,SPTBN1,ASB3,CFAP36,ACYP2,CHAC2,CCDC88A,CLHC1,RPS27A,LOC101120154,ERLEC1,PPP4R3B,LOC105608757,LOC106991051,PSME4,C3H2orf73,LOC101112474,LOC106990597,GPR75,CCDC85A
3	69990601	69992200	66751036	71911412	bone density QTL (95812)	EML6,LOC105613853,EFEMP1,TRNAE-UUC,RTN4,LOC106991052,LOC101122262,LOC105613774,LOC105613445,LOC106990985,PNPT1,TSPYL6,MTIF2,LOC105613776,SPTBN1,ASB3,CFAP36,ACYP2,CHAC2,CCDC88A,CLHC1,RPS27A,LOC101120154,ERLEC1,PPP4R3B,LOC105608757,LOC106991051,PSME4,C3H2orf73,LOC101112474,LOC106990597,GPR75,CCDC85A
3	71077901	71080700	66751036	71911412	bone density QTL (95812)	EML6,LOC105613853,EFEMP1,TRNAE-UUC,RTN4,LOC106991052,LOC101122262,LOC105613774,LOC105613445,LOC106990985,PNPT1,TSPYL6,MTIF2,LOC105613776,SPTBN1,ASB3,CFAP36,ACYP2,CHAC2,CCDC88A,CLHC1,RPS27A,LOC101120154,ERLEC1,PPP4R3B,LOC105608757,LOC106991051,PSME4,C3H2orf73,LOC101112474,LOC106990597,GPR75,CCDC85A
3	71570101	71571500	66751036	71911412	bone density QTL (95812)	EML6,LOC105613853,EFEMP1,TRNAE-UUC,RTN4,LOC106991052,LOC101122262,LOC105613774,LOC105613445,LOC106990985,PNPT1,TSPYL6,MTIF2,LOC105613776,SPTBN1,ASB3,CFAP36,ACYP2,CHAC2,CCDC88A,CLHC1,RPS27A,LOC101120154,ERLEC1,PPP4R3B,LOC105608757,LOC106991051,PSME4,C3H2orf73,LOC101112474,LOC106990597,GPR75,CCDC85A
3	71625901	71627200	66751036	71911412	bone density QTL (95812)	EML6,LOC105613853,EFEMP1,TRNAE-UUC,RTN4,LOC106991052,LOC101122262,LOC105613774,LOC105613445,LOC106990985,PNPT1,TSPYL6,MTIF2,LOC105613776,SPTBN1,ASB3,CFAP36,ACYP2,CHAC2,CCDC88A,CLHC1,RPS27A,LOC101120154,ERLEC1,PPP4R3B,LOC105608757,LOC106991051,PSME4,C3H2orf73,LOC101112474,LOC106990597,GPR75,CCDC85A
3	71652201	71655000	66751036	71911412	bone density QTL (95812)	EML6,LOC105613853,EFEMP1,TRNAE-UUC,RTN4,LOC106991052,LOC101122262,LOC105613774,LOC105613445,LOC106990985,PNPT1,TSPYL6,MTIF2,LOC105613776,SPTBN1,ASB3,CFAP36,ACYP2,CHAC2,CCDC88A,CLHC1,RPS27A,LOC101120154,ERLEC1,PPP4R3B,LOC105608757,LOC106991051,PSME4,C3H2orf73,LOC101112474,LOC106990597,GPR75,CCDC85A
3	71697701	71698700	66751036	71911412	bone density QTL (95812)	EML6,LOC105613853,EFEMP1,TRNAE-UUC,RTN4,LOC106991052,LOC101122262,LOC105613774,LOC105613445,LOC106990985,PNPT1,TSPYL6,MTIF2,LOC105613776,SPTBN1,ASB3,CFAP36,ACYP2,CHAC2,CCDC88A,CLHC1,RPS27A,LOC101120154,ERLEC1,PPP4R3B,LOC105608757,LOC106991051,PSME4,C3H2orf73,LOC101112474,LOC106990597,GPR75,CCDC85A
3	71827101	71828100	66751036	71911412	bone density QTL (95812)	EML6,LOC105613853,EFEMP1,TRNAE-UUC,RTN4,LOC106991052,LOC101122262,LOC105613774,LOC105613445,LOC106990985,PNPT1,TSPYL6,MTIF2,LOC105613776,SPTBN1,ASB3,CFAP36,ACYP2,CHAC2,CCDC88A,CLHC1,RPS27A,LOC101120154,ERLEC1,PPP4R3B,LOC105608757,LOC106991051,PSME4,C3H2orf73,LOC101112474,LOC106990597,GPR75,CCDC85A
3	71831801	71833600	66751036	71911412	bone density QTL (95812)	EML6,LOC105613853,EFEMP1,TRNAE-UUC,RTN4,LOC106991052,LOC101122262,LOC105613774,LOC105613445,LOC106990985,PNPT1,TSPYL6,MTIF2,LOC105613776,SPTBN1,ASB3,CFAP36,ACYP2,CHAC2,CCDC88A,CLHC1,RPS27A,LOC101120154,ERLEC1,PPP4R3B,LOC105608757,LOC106991051,PSME4,C3H2orf73,LOC101112474,LOC106990597,GPR75,CCDC85A
3	71875401	71881600	66751036	71911412	bone density QTL (95812)	EML6,LOC105613853,EFEMP1,TRNAE-UUC,RTN4,LOC106991052,LOC101122262,LOC105613774,LOC105613445,LOC106990985,PNPT1,TSPYL6,MTIF2,LOC105613776,SPTBN1,ASB3,CFAP36,ACYP2,CHAC2,CCDC88A,CLHC1,RPS27A,LOC101120154,ERLEC1,PPP4R3B,LOC105608757,LOC106991051,PSME4,C3H2orf73,LOC101112474,LOC106990597,GPR75,CCDC85A
3	72341301	72342500	69636932	74955906	bone density QTL (95813)	LOC105613853,LOC101105145,LOC105612039,NRXN1,LOC105612041,LOC105613445,ASB3,ACYP2,CHAC2,TRNAW-CCA,LOC105612040,LOC105613928,ERLEC1,LOC105613934,LOC101112973,PSME4,LOC101112474,LOC106990597,GPR75
3	74391501	74392500	69636932	74955906	bone density QTL (95813)	LOC105613853,LOC101105145,LOC105612039,NRXN1,LOC105612041,LOC105613445,ASB3,ACYP2,CHAC2,TRNAW-CCA,LOC105612040,LOC105613928,ERLEC1,LOC105613934,LOC101112973,PSME4,LOC101112474,LOC106990597,GPR75
3	74472901	74474000	69636932	74955906	bone density QTL (95813)	LOC105613853,LOC101105145,LOC105612039,NRXN1,LOC105612041,LOC105613445,ASB3,ACYP2,CHAC2,TRNAW-CCA,LOC105612040,LOC105613928,ERLEC1,LOC105613934,LOC101112973,PSME4,LOC101112474,LOC106990597,GPR75
3	93259201	93264400	93181059	93827729	Tail fat deposition QTL (126999)	LOC106990990,DYSF
3	93287201	93289100	93181059	93827729	Tail fat deposition QTL (126999)	LOC106990990,DYSF
3	93512801	93513800	93181059	93827729	Tail fat deposition QTL (126999)	LOC106990990,DYSF
3	97008401	97009800	96997525	97041571	Milk Yield QTL (57740)	FHL2,C3H2orf49,TGFBRAP1,LOC105612334
3	98055801	98056900	97967732	98360846	Fecal egg count QTL (125779)
3	98093101	98094300	97967732	98360846	Fecal egg count QTL (125779)
3	98139801	98140800	97967732	98360846	Fecal egg count QTL (125779)
3	98188801	98192400	97967732	98360846	Fecal egg count QTL (125779)
3	130017401	130021200	129162957	140464090	Milk protein percentage QTL (57741)	KRT1,HOXC8,GPD1,LOC105614728,LARP4,LOC101106252,LMBR1L,SP1,IGFBP6,HOXC9,TRNAE-UUC,LOC101112304,LOC101115112,LOC105614718,LOC101109951,ATG101,PRPH,KANSL2,SP7,LOC105611011,LOC105610999,KMT2D,KRT4,LOC101123287,LOC101123028,LOC101113055,C3H12orf54,HOXC10,DNAJC22,TMBIM6,LOC101119713,SMARCD1,CSAD,LOC101102226,AMHR2,DHH,LOC101118004,LOC105610939,LETMD1,LOC101103465,LOC101104739,LOC101106764,METAP2,KRT84…
3	130309401	130310900	129162957	140464090	Milk protein percentage QTL (57741)	KRT1,HOXC8,GPD1,LOC105614728,LARP4,LOC101106252,LMBR1L,SP1,IGFBP6,HOXC9,TRNAE-UUC,LOC101112304,LOC101115112,LOC105614718,LOC101109951,ATG101,PRPH,KANSL2,SP7,LOC105611011,LOC105610999,KMT2D,KRT4,LOC101123287,LOC101123028,LOC101113055,C3H12orf54,HOXC10,DNAJC22,TMBIM6,LOC101119713,SMARCD1,CSAD,LOC101102226,AMHR2,DHH,LOC101118004,LOC105610939,LETMD1,LOC101103465,LOC101104739,LOC101106764,METAP2,KRT84…
3	130451801	130453400	129162957	140464090	Milk protein percentage QTL (57741)	KRT1,HOXC8,GPD1,LOC105614728,LARP4,LOC101106252,LMBR1L,SP1,IGFBP6,HOXC9,TRNAE-UUC,LOC101112304,LOC101115112,LOC105614718,LOC101109951,ATG101,PRPH,KANSL2,SP7,LOC105611011,LOC105610999,KMT2D,KRT4,LOC101123287,LOC101123028,LOC101113055,C3H12orf54,HOXC10,DNAJC22,TMBIM6,LOC101119713,SMARCD1,CSAD,LOC101102226,AMHR2,DHH,LOC101118004,LOC105610939,LETMD1,LOC101103465,LOC101104739,LOC101106764,METAP2,KRT84…
3	133102901	133104000	129162957	140464090	Milk protein percentage QTL (57741)	KRT1,HOXC8,GPD1,LOC105614728,LARP4,LOC101106252,LMBR1L,SP1,IGFBP6,HOXC9,TRNAE-UUC,LOC101112304,LOC101115112,LOC105614718,LOC101109951,ATG101,PRPH,KANSL2,SP7,LOC105611011,LOC105610999,KMT2D,KRT4,LOC101123287,LOC101123028,LOC101113055,C3H12orf54,HOXC10,DNAJC22,TMBIM6,LOC101119713,SMARCD1,CSAD,LOC101102226,AMHR2,DHH,LOC101118004,LOC105610939,LETMD1,LOC101103465,LOC101104739,LOC101106764,METAP2,KRT84…
3	133563301	133567300	129162957	140464090	Milk protein percentage QTL (57741)	KRT1,HOXC8,GPD1,LOC105614728,LARP4,LOC101106252,LMBR1L,SP1,IGFBP6,HOXC9,TRNAE-UUC,LOC101112304,LOC101115112,LOC105614718,LOC101109951,ATG101,PRPH,KANSL2,SP7,LOC105611011,LOC105610999,KMT2D,KRT4,LOC101123287,LOC101123028,LOC101113055,C3H12orf54,HOXC10,DNAJC22,TMBIM6,LOC101119713,SMARCD1,CSAD,LOC101102226,AMHR2,DHH,LOC101118004,LOC105610939,LETMD1,LOC101103465,LOC101104739,LOC101106764,METAP2,KRT84…
3	133571601	133578500	129162957	140464090	Milk protein percentage QTL (57741)	KRT1,HOXC8,GPD1,LOC105614728,LARP4,LOC101106252,LMBR1L,SP1,IGFBP6,HOXC9,TRNAE-UUC,LOC101112304,LOC101115112,LOC105614718,LOC101109951,ATG101,PRPH,KANSL2,SP7,LOC105611011,LOC105610999,KMT2D,KRT4,LOC101123287,LOC101123028,LOC101113055,C3H12orf54,HOXC10,DNAJC22,TMBIM6,LOC101119713,SMARCD1,CSAD,LOC101102226,AMHR2,DHH,LOC101118004,LOC105610939,LETMD1,LOC101103465,LOC101104739,LOC101106764,METAP2,KRT84…
3	133725701	133726800	129162957	140464090	Milk protein percentage QTL (57741)	KRT1,HOXC8,GPD1,LOC105614728,LARP4,LOC101106252,LMBR1L,SP1,IGFBP6,HOXC9,TRNAE-UUC,LOC101112304,LOC101115112,LOC105614718,LOC101109951,ATG101,PRPH,KANSL2,SP7,LOC105611011,LOC105610999,KMT2D,KRT4,LOC101123287,LOC101123028,LOC101113055,C3H12orf54,HOXC10,DNAJC22,TMBIM6,LOC101119713,SMARCD1,CSAD,LOC101102226,AMHR2,DHH,LOC101118004,LOC105610939,LETMD1,LOC101103465,LOC101104739,LOC101106764,METAP2,KRT84…
3	134321901	134323700	129162957	140464090	Milk protein percentage QTL (57741)	KRT1,HOXC8,GPD1,LOC105614728,LARP4,LOC101106252,LMBR1L,SP1,IGFBP6,HOXC9,TRNAE-UUC,LOC101112304,LOC101115112,LOC105614718,LOC101109951,ATG101,PRPH,KANSL2,SP7,LOC105611011,LOC105610999,KMT2D,KRT4,LOC101123287,LOC101123028,LOC101113055,C3H12orf54,HOXC10,DNAJC22,TMBIM6,LOC101119713,SMARCD1,CSAD,LOC101102226,AMHR2,DHH,LOC101118004,LOC105610939,LETMD1,LOC101103465,LOC101104739,LOC101106764,METAP2,KRT84…
3	134494401	134495500	129162957	140464090	Milk protein percentage QTL (57741)	KRT1,HOXC8,GPD1,LOC105614728,LARP4,LOC101106252,LMBR1L,SP1,IGFBP6,HOXC9,TRNAE-UUC,LOC101112304,LOC101115112,LOC105614718,LOC101109951,ATG101,PRPH,KANSL2,SP7,LOC105611011,LOC105610999,KMT2D,KRT4,LOC101123287,LOC101123028,LOC101113055,C3H12orf54,HOXC10,DNAJC22,TMBIM6,LOC101119713,SMARCD1,CSAD,LOC101102226,AMHR2,DHH,LOC101118004,LOC105610939,LETMD1,LOC101103465,LOC101104739,LOC101106764,METAP2,KRT84…
3	134894801	134896300	129162957	140464090	Milk protein percentage QTL (57741)	KRT1,HOXC8,GPD1,LOC105614728,LARP4,LOC101106252,LMBR1L,SP1,IGFBP6,HOXC9,TRNAE-UUC,LOC101112304,LOC101115112,LOC105614718,LOC101109951,ATG101,PRPH,KANSL2,SP7,LOC105611011,LOC105610999,KMT2D,KRT4,LOC101123287,LOC101123028,LOC101113055,C3H12orf54,HOXC10,DNAJC22,TMBIM6,LOC101119713,SMARCD1,CSAD,LOC101102226,AMHR2,DHH,LOC101118004,LOC105610939,LETMD1,LOC101103465,LOC101104739,LOC101106764,METAP2,KRT84…
3	135101101	135102300	129162957	140464090	Milk protein percentage QTL (57741)	KRT1,HOXC8,GPD1,LOC105614728,LARP4,LOC101106252,LMBR1L,SP1,IGFBP6,HOXC9,TRNAE-UUC,LOC101112304,LOC101115112,LOC105614718,LOC101109951,ATG101,PRPH,KANSL2,SP7,LOC105611011,LOC105610999,KMT2D,KRT4,LOC101123287,LOC101123028,LOC101113055,C3H12orf54,HOXC10,DNAJC22,TMBIM6,LOC101119713,SMARCD1,CSAD,LOC101102226,AMHR2,DHH,LOC101118004,LOC105610939,LETMD1,LOC101103465,LOC101104739,LOC101106764,METAP2,KRT84…
3	135117801	135119500	129162957	140464090	Milk protein percentage QTL (57741)	KRT1,HOXC8,GPD1,LOC105614728,LARP4,LOC101106252,LMBR1L,SP1,IGFBP6,HOXC9,TRNAE-UUC,LOC101112304,LOC101115112,LOC105614718,LOC101109951,ATG101,PRPH,KANSL2,SP7,LOC105611011,LOC105610999,KMT2D,KRT4,LOC101123287,LOC101123028,LOC101113055,C3H12orf54,HOXC10,DNAJC22,TMBIM6,LOC101119713,SMARCD1,CSAD,LOC101102226,AMHR2,DHH,LOC101118004,LOC105610939,LETMD1,LOC101103465,LOC101104739,LOC101106764,METAP2,KRT84…
3	135900101	135901100	129162957	140464090	Milk protein percentage QTL (57741)	KRT1,HOXC8,GPD1,LOC105614728,LARP4,LOC101106252,LMBR1L,SP1,IGFBP6,HOXC9,TRNAE-UUC,LOC101112304,LOC101115112,LOC105614718,LOC101109951,ATG101,PRPH,KANSL2,SP7,LOC105611011,LOC105610999,KMT2D,KRT4,LOC101123287,LOC101123028,LOC101113055,C3H12orf54,HOXC10,DNAJC22,TMBIM6,LOC101119713,SMARCD1,CSAD,LOC101102226,AMHR2,DHH,LOC101118004,LOC105610939,LETMD1,LOC101103465,LOC101104739,LOC101106764,METAP2,KRT84…
3	136485001	136486200	129162957	140464090	Milk protein percentage QTL (57741)	KRT1,HOXC8,GPD1,LOC105614728,LARP4,LOC101106252,LMBR1L,SP1,IGFBP6,HOXC9,TRNAE-UUC,LOC101112304,LOC101115112,LOC105614718,LOC101109951,ATG101,PRPH,KANSL2,SP7,LOC105611011,LOC105610999,KMT2D,KRT4,LOC101123287,LOC101123028,LOC101113055,C3H12orf54,HOXC10,DNAJC22,TMBIM6,LOC101119713,SMARCD1,CSAD,LOC101102226,AMHR2,DHH,LOC101118004,LOC105610939,LETMD1,LOC101103465,LOC101104739,LOC101106764,METAP2,KRT84…
3	136613401	136616200	129162957	140464090	Milk protein percentage QTL (57741)	KRT1,HOXC8,GPD1,LOC105614728,LARP4,LOC101106252,LMBR1L,SP1,IGFBP6,HOXC9,TRNAE-UUC,LOC101112304,LOC101115112,LOC105614718,LOC101109951,ATG101,PRPH,KANSL2,SP7,LOC105611011,LOC105610999,KMT2D,KRT4,LOC101123287,LOC101123028,LOC101113055,C3H12orf54,HOXC10,DNAJC22,TMBIM6,LOC101119713,SMARCD1,CSAD,LOC101102226,AMHR2,DHH,LOC101118004,LOC105610939,LETMD1,LOC101103465,LOC101104739,LOC101106764,METAP2,KRT84…
3	137180901	137183600	129162957	140464090	Milk protein percentage QTL (57741)	KRT1,HOXC8,GPD1,LOC105614728,LARP4,LOC101106252,LMBR1L,SP1,IGFBP6,HOXC9,TRNAE-UUC,LOC101112304,LOC101115112,LOC105614718,LOC101109951,ATG101,PRPH,KANSL2,SP7,LOC105611011,LOC105610999,KMT2D,KRT4,LOC101123287,LOC101123028,LOC101113055,C3H12orf54,HOXC10,DNAJC22,TMBIM6,LOC101119713,SMARCD1,CSAD,LOC101102226,AMHR2,DHH,LOC101118004,LOC105610939,LETMD1,LOC101103465,LOC101104739,LOC101106764,METAP2,KRT84…
3	137514101	137515300	129162957	140464090	Milk protein percentage QTL (57741)	KRT1,HOXC8,GPD1,LOC105614728,LARP4,LOC101106252,LMBR1L,SP1,IGFBP6,HOXC9,TRNAE-UUC,LOC101112304,LOC101115112,LOC105614718,LOC101109951,ATG101,PRPH,KANSL2,SP7,LOC105611011,LOC105610999,KMT2D,KRT4,LOC101123287,LOC101123028,LOC101113055,C3H12orf54,HOXC10,DNAJC22,TMBIM6,LOC101119713,SMARCD1,CSAD,LOC101102226,AMHR2,DHH,LOC101118004,LOC105610939,LETMD1,LOC101103465,LOC101104739,LOC101106764,METAP2,KRT84…
3	137723601	137724700	129162957	140464090	Milk protein percentage QTL (57741)	KRT1,HOXC8,GPD1,LOC105614728,LARP4,LOC101106252,LMBR1L,SP1,IGFBP6,HOXC9,TRNAE-UUC,LOC101112304,LOC101115112,LOC105614718,LOC101109951,ATG101,PRPH,KANSL2,SP7,LOC105611011,LOC105610999,KMT2D,KRT4,LOC101123287,LOC101123028,LOC101113055,C3H12orf54,HOXC10,DNAJC22,TMBIM6,LOC101119713,SMARCD1,CSAD,LOC101102226,AMHR2,DHH,LOC101118004,LOC105610939,LETMD1,LOC101103465,LOC101104739,LOC101106764,METAP2,KRT84…
3	137790901	137792100	129162957	140464090	Milk protein percentage QTL (57741)	KRT1,HOXC8,GPD1,LOC105614728,LARP4,LOC101106252,LMBR1L,SP1,IGFBP6,HOXC9,TRNAE-UUC,LOC101112304,LOC101115112,LOC105614718,LOC101109951,ATG101,PRPH,KANSL2,SP7,LOC105611011,LOC105610999,KMT2D,KRT4,LOC101123287,LOC101123028,LOC101113055,C3H12orf54,HOXC10,DNAJC22,TMBIM6,LOC101119713,SMARCD1,CSAD,LOC101102226,AMHR2,DHH,LOC101118004,LOC105610939,LETMD1,LOC101103465,LOC101104739,LOC101106764,METAP2,KRT84…
3	138597501	138601900	129162957	140464090	Milk protein percentage QTL (57741)	KRT1,HOXC8,GPD1,LOC105614728,LARP4,LOC101106252,LMBR1L,SP1,IGFBP6,HOXC9,TRNAE-UUC,LOC101112304,LOC101115112,LOC105614718,LOC101109951,ATG101,PRPH,KANSL2,SP7,LOC105611011,LOC105610999,KMT2D,KRT4,LOC101123287,LOC101123028,LOC101113055,C3H12orf54,HOXC10,DNAJC22,TMBIM6,LOC101119713,SMARCD1,CSAD,LOC101102226,AMHR2,DHH,LOC101118004,LOC105610939,LETMD1,LOC101103465,LOC101104739,LOC101106764,METAP2,KRT84…
3	138611201	138615100	129162957	140464090	Milk protein percentage QTL (57741)	KRT1,HOXC8,GPD1,LOC105614728,LARP4,LOC101106252,LMBR1L,SP1,IGFBP6,HOXC9,TRNAE-UUC,LOC101112304,LOC101115112,LOC105614718,LOC101109951,ATG101,PRPH,KANSL2,SP7,LOC105611011,LOC105610999,KMT2D,KRT4,LOC101123287,LOC101123028,LOC101113055,C3H12orf54,HOXC10,DNAJC22,TMBIM6,LOC101119713,SMARCD1,CSAD,LOC101102226,AMHR2,DHH,LOC101118004,LOC105610939,LETMD1,LOC101103465,LOC101104739,LOC101106764,METAP2,KRT84…
3	138661201	138662400	129162957	140464090	Milk protein percentage QTL (57741)	KRT1,HOXC8,GPD1,LOC105614728,LARP4,LOC101106252,LMBR1L,SP1,IGFBP6,HOXC9,TRNAE-UUC,LOC101112304,LOC101115112,LOC105614718,LOC101109951,ATG101,PRPH,KANSL2,SP7,LOC105611011,LOC105610999,KMT2D,KRT4,LOC101123287,LOC101123028,LOC101113055,C3H12orf54,HOXC10,DNAJC22,TMBIM6,LOC101119713,SMARCD1,CSAD,LOC101102226,AMHR2,DHH,LOC101118004,LOC105610939,LETMD1,LOC101103465,LOC101104739,LOC101106764,METAP2,KRT84…
3	139704401	139706800	129162957	140464090	Milk protein percentage QTL (57741)	KRT1,HOXC8,GPD1,LOC105614728,LARP4,LOC101106252,LMBR1L,SP1,IGFBP6,HOXC9,TRNAE-UUC,LOC101112304,LOC101115112,LOC105614718,LOC101109951,ATG101,PRPH,KANSL2,SP7,LOC105611011,LOC105610999,KMT2D,KRT4,LOC101123287,LOC101123028,LOC101113055,C3H12orf54,HOXC10,DNAJC22,TMBIM6,LOC101119713,SMARCD1,CSAD,LOC101102226,AMHR2,DHH,LOC101118004,LOC105610939,LETMD1,LOC101103465,LOC101104739,LOC101106764,METAP2,KRT84…
3	139990401	139991400	129162957	140464090	Milk protein percentage QTL (57741)	KRT1,HOXC8,GPD1,LOC105614728,LARP4,LOC101106252,LMBR1L,SP1,IGFBP6,HOXC9,TRNAE-UUC,LOC101112304,LOC101115112,LOC105614718,LOC101109951,ATG101,PRPH,KANSL2,SP7,LOC105611011,LOC105610999,KMT2D,KRT4,LOC101123287,LOC101123028,LOC101113055,C3H12orf54,HOXC10,DNAJC22,TMBIM6,LOC101119713,SMARCD1,CSAD,LOC101102226,AMHR2,DHH,LOC101118004,LOC105610939,LETMD1,LOC101103465,LOC101104739,LOC101106764,METAP2,KRT84…
3	140057401	140058500	129162957	140464090	Milk protein percentage QTL (57741)	KRT1,HOXC8,GPD1,LOC105614728,LARP4,LOC101106252,LMBR1L,SP1,IGFBP6,HOXC9,TRNAE-UUC,LOC101112304,LOC101115112,LOC105614718,LOC101109951,ATG101,PRPH,KANSL2,SP7,LOC105611011,LOC105610999,KMT2D,KRT4,LOC101123287,LOC101123028,LOC101113055,C3H12orf54,HOXC10,DNAJC22,TMBIM6,LOC101119713,SMARCD1,CSAD,LOC101102226,AMHR2,DHH,LOC101118004,LOC105610939,LETMD1,LOC101103465,LOC101104739,LOC101106764,METAP2,KRT84…
3	140332401	140333700	129162957	140464090	Milk protein percentage QTL (57741)	KRT1,HOXC8,GPD1,LOC105614728,LARP4,LOC101106252,LMBR1L,SP1,IGFBP6,HOXC9,TRNAE-UUC,LOC101112304,LOC101115112,LOC105614718,LOC101109951,ATG101,PRPH,KANSL2,SP7,LOC105611011,LOC105610999,KMT2D,KRT4,LOC101123287,LOC101123028,LOC101113055,C3H12orf54,HOXC10,DNAJC22,TMBIM6,LOC101119713,SMARCD1,CSAD,LOC101102226,AMHR2,DHH,LOC101118004,LOC105610939,LETMD1,LOC101103465,LOC101104739,LOC101106764,METAP2,KRT84…
3	140709401	140710600	134354373	194127767	Milk fat percentage QTL (57739)	LOC101117240,LOC105614917,NTN4,TRNAK-UUU,RFX4,LOC105611569,LOC101115112,PRPH,LOC105614148,LOC106990328,ABCC9,LOC101117744,R3HDM2,KMT2D,LOC105605372,GNS,ERGIC2,DNAJC22,LOC105614765,PA2G4,BICD1,FAR2,ERBB3,LOC105613670,LOC105613279,LOC101106928,CCDC91,LOC101103465,MTERF2,LOC101104739,LOC101106764,SPRYD4,ARHGEF25,NEMP1,CCT2,LOC105614919,LOC105614778,TXN2,LOC105609952,ORMDL2,DNM1L,LOC101107947,SARNP,M…
3	140727401	140728600	134354373	194127767	Milk fat percentage QTL (57739)	LOC101117240,LOC105614917,NTN4,TRNAK-UUU,RFX4,LOC105611569,LOC101115112,PRPH,LOC105614148,LOC106990328,ABCC9,LOC101117744,R3HDM2,KMT2D,LOC105605372,GNS,ERGIC2,DNAJC22,LOC105614765,PA2G4,BICD1,FAR2,ERBB3,LOC105613670,LOC105613279,LOC101106928,CCDC91,LOC101103465,MTERF2,LOC101104739,LOC101106764,SPRYD4,ARHGEF25,NEMP1,CCT2,LOC105614919,LOC105614778,TXN2,LOC105609952,ORMDL2,DNM1L,LOC101107947,SARNP,M…
3	140750601	140751800	134354373	194127767	Milk fat percentage QTL (57739)	LOC101117240,LOC105614917,NTN4,TRNAK-UUU,RFX4,LOC105611569,LOC101115112,PRPH,LOC105614148,LOC106990328,ABCC9,LOC101117744,R3HDM2,KMT2D,LOC105605372,GNS,ERGIC2,DNAJC22,LOC105614765,PA2G4,BICD1,FAR2,ERBB3,LOC105613670,LOC105613279,LOC101106928,CCDC91,LOC101103465,MTERF2,LOC101104739,LOC101106764,SPRYD4,ARHGEF25,NEMP1,CCT2,LOC105614919,LOC105614778,TXN2,LOC105609952,ORMDL2,DNM1L,LOC101107947,SARNP,M…
3	141331001	141332700	134354373	194127767	Milk fat percentage QTL (57739)	LOC101117240,LOC105614917,NTN4,TRNAK-UUU,RFX4,LOC105611569,LOC101115112,PRPH,LOC105614148,LOC106990328,ABCC9,LOC101117744,R3HDM2,KMT2D,LOC105605372,GNS,ERGIC2,DNAJC22,LOC105614765,PA2G4,BICD1,FAR2,ERBB3,LOC105613670,LOC105613279,LOC101106928,CCDC91,LOC101103465,MTERF2,LOC101104739,LOC101106764,SPRYD4,ARHGEF25,NEMP1,CCT2,LOC105614919,LOC105614778,TXN2,LOC105609952,ORMDL2,DNM1L,LOC101107947,SARNP,M…
3	141768301	141769800	134354373	194127767	Milk fat percentage QTL (57739)	LOC101117240,LOC105614917,NTN4,TRNAK-UUU,RFX4,LOC105611569,LOC101115112,PRPH,LOC105614148,LOC106990328,ABCC9,LOC101117744,R3HDM2,KMT2D,LOC105605372,GNS,ERGIC2,DNAJC22,LOC105614765,PA2G4,BICD1,FAR2,ERBB3,LOC105613670,LOC105613279,LOC101106928,CCDC91,LOC101103465,MTERF2,LOC101104739,LOC101106764,SPRYD4,ARHGEF25,NEMP1,CCT2,LOC105614919,LOC105614778,TXN2,LOC105609952,ORMDL2,DNM1L,LOC101107947,SARNP,M…
3	142724101	142725400	134354373	194127767	Milk fat percentage QTL (57739)	LOC101117240,LOC105614917,NTN4,TRNAK-UUU,RFX4,LOC105611569,LOC101115112,PRPH,LOC105614148,LOC106990328,ABCC9,LOC101117744,R3HDM2,KMT2D,LOC105605372,GNS,ERGIC2,DNAJC22,LOC105614765,PA2G4,BICD1,FAR2,ERBB3,LOC105613670,LOC105613279,LOC101106928,CCDC91,LOC101103465,MTERF2,LOC101104739,LOC101106764,SPRYD4,ARHGEF25,NEMP1,CCT2,LOC105614919,LOC105614778,TXN2,LOC105609952,ORMDL2,DNM1L,LOC101107947,SARNP,M…
3	143027601	143029100	134354373	194127767	Milk fat percentage QTL (57739)	LOC101117240,LOC105614917,NTN4,TRNAK-UUU,RFX4,LOC105611569,LOC101115112,PRPH,LOC105614148,LOC106990328,ABCC9,LOC101117744,R3HDM2,KMT2D,LOC105605372,GNS,ERGIC2,DNAJC22,LOC105614765,PA2G4,BICD1,FAR2,ERBB3,LOC105613670,LOC105613279,LOC101106928,CCDC91,LOC101103465,MTERF2,LOC101104739,LOC101106764,SPRYD4,ARHGEF25,NEMP1,CCT2,LOC105614919,LOC105614778,TXN2,LOC105609952,ORMDL2,DNM1L,LOC101107947,SARNP,M…
3	143037301	143038700	134354373	194127767	Milk fat percentage QTL (57739)	LOC101117240,LOC105614917,NTN4,TRNAK-UUU,RFX4,LOC105611569,LOC101115112,PRPH,LOC105614148,LOC106990328,ABCC9,LOC101117744,R3HDM2,KMT2D,LOC105605372,GNS,ERGIC2,DNAJC22,LOC105614765,PA2G4,BICD1,FAR2,ERBB3,LOC105613670,LOC105613279,LOC101106928,CCDC91,LOC101103465,MTERF2,LOC101104739,LOC101106764,SPRYD4,ARHGEF25,NEMP1,CCT2,LOC105614919,LOC105614778,TXN2,LOC105609952,ORMDL2,DNM1L,LOC101107947,SARNP,M…
3	143643701	143644800	134354373	194127767	Milk fat percentage QTL (57739)	LOC101117240,LOC105614917,NTN4,TRNAK-UUU,RFX4,LOC105611569,LOC101115112,PRPH,LOC105614148,LOC106990328,ABCC9,LOC101117744,R3HDM2,KMT2D,LOC105605372,GNS,ERGIC2,DNAJC22,LOC105614765,PA2G4,BICD1,FAR2,ERBB3,LOC105613670,LOC105613279,LOC101106928,CCDC91,LOC101103465,MTERF2,LOC101104739,LOC101106764,SPRYD4,ARHGEF25,NEMP1,CCT2,LOC105614919,LOC105614778,TXN2,LOC105609952,ORMDL2,DNM1L,LOC101107947,SARNP,M…
3	144311901	144313000	134354373	194127767	Milk fat percentage QTL (57739)	LOC101117240,LOC105614917,NTN4,TRNAK-UUU,RFX4,LOC105611569,LOC101115112,PRPH,LOC105614148,LOC106990328,ABCC9,LOC101117744,R3HDM2,KMT2D,LOC105605372,GNS,ERGIC2,DNAJC22,LOC105614765,PA2G4,BICD1,FAR2,ERBB3,LOC105613670,LOC105613279,LOC101106928,CCDC91,LOC101103465,MTERF2,LOC101104739,LOC101106764,SPRYD4,ARHGEF25,NEMP1,CCT2,LOC105614919,LOC105614778,TXN2,LOC105609952,ORMDL2,DNM1L,LOC101107947,SARNP,M…
3	145193601	145197300	134354373	194127767	Milk fat percentage QTL (57739)	LOC101117240,LOC105614917,NTN4,TRNAK-UUU,RFX4,LOC105611569,LOC101115112,PRPH,LOC105614148,LOC106990328,ABCC9,LOC101117744,R3HDM2,KMT2D,LOC105605372,GNS,ERGIC2,DNAJC22,LOC105614765,PA2G4,BICD1,FAR2,ERBB3,LOC105613670,LOC105613279,LOC101106928,CCDC91,LOC101103465,MTERF2,LOC101104739,LOC101106764,SPRYD4,ARHGEF25,NEMP1,CCT2,LOC105614919,LOC105614778,TXN2,LOC105609952,ORMDL2,DNM1L,LOC101107947,SARNP,M…
3	145474701	145476100	134354373	194127767	Milk fat percentage QTL (57739)	LOC101117240,LOC105614917,NTN4,TRNAK-UUU,RFX4,LOC105611569,LOC101115112,PRPH,LOC105614148,LOC106990328,ABCC9,LOC101117744,R3HDM2,KMT2D,LOC105605372,GNS,ERGIC2,DNAJC22,LOC105614765,PA2G4,BICD1,FAR2,ERBB3,LOC105613670,LOC105613279,LOC101106928,CCDC91,LOC101103465,MTERF2,LOC101104739,LOC101106764,SPRYD4,ARHGEF25,NEMP1,CCT2,LOC105614919,LOC105614778,TXN2,LOC105609952,ORMDL2,DNM1L,LOC101107947,SARNP,M…
3	146069001	146070000	134354373	194127767	Milk fat percentage QTL (57739)	LOC101117240,LOC105614917,NTN4,TRNAK-UUU,RFX4,LOC105611569,LOC101115112,PRPH,LOC105614148,LOC106990328,ABCC9,LOC101117744,R3HDM2,KMT2D,LOC105605372,GNS,ERGIC2,DNAJC22,LOC105614765,PA2G4,BICD1,FAR2,ERBB3,LOC105613670,LOC105613279,LOC101106928,CCDC91,LOC101103465,MTERF2,LOC101104739,LOC101106764,SPRYD4,ARHGEF25,NEMP1,CCT2,LOC105614919,LOC105614778,TXN2,LOC105609952,ORMDL2,DNM1L,LOC101107947,SARNP,M…
3	146267601	146271100	134354373	194127767	Milk fat percentage QTL (57739)	LOC101117240,LOC105614917,NTN4,TRNAK-UUU,RFX4,LOC105611569,LOC101115112,PRPH,LOC105614148,LOC106990328,ABCC9,LOC101117744,R3HDM2,KMT2D,LOC105605372,GNS,ERGIC2,DNAJC22,LOC105614765,PA2G4,BICD1,FAR2,ERBB3,LOC105613670,LOC105613279,LOC101106928,CCDC91,LOC101103465,MTERF2,LOC101104739,LOC101106764,SPRYD4,ARHGEF25,NEMP1,CCT2,LOC105614919,LOC105614778,TXN2,LOC105609952,ORMDL2,DNM1L,LOC101107947,SARNP,M…
3	147122601	147123600	134354373	194127767	Milk fat percentage QTL (57739)	LOC101117240,LOC105614917,NTN4,TRNAK-UUU,RFX4,LOC105611569,LOC101115112,PRPH,LOC105614148,LOC106990328,ABCC9,LOC101117744,R3HDM2,KMT2D,LOC105605372,GNS,ERGIC2,DNAJC22,LOC105614765,PA2G4,BICD1,FAR2,ERBB3,LOC105613670,LOC105613279,LOC101106928,CCDC91,LOC101103465,MTERF2,LOC101104739,LOC101106764,SPRYD4,ARHGEF25,NEMP1,CCT2,LOC105614919,LOC105614778,TXN2,LOC105609952,ORMDL2,DNM1L,LOC101107947,SARNP,M…
3	147298201	147299300	134354373	194127767	Milk fat percentage QTL (57739)	LOC101117240,LOC105614917,NTN4,TRNAK-UUU,RFX4,LOC105611569,LOC101115112,PRPH,LOC105614148,LOC106990328,ABCC9,LOC101117744,R3HDM2,KMT2D,LOC105605372,GNS,ERGIC2,DNAJC22,LOC105614765,PA2G4,BICD1,FAR2,ERBB3,LOC105613670,LOC105613279,LOC101106928,CCDC91,LOC101103465,MTERF2,LOC101104739,LOC101106764,SPRYD4,ARHGEF25,NEMP1,CCT2,LOC105614919,LOC105614778,TXN2,LOC105609952,ORMDL2,DNM1L,LOC101107947,SARNP,M…
3	147567401	147568500	134354373	194127767	Milk fat percentage QTL (57739)	LOC101117240,LOC105614917,NTN4,TRNAK-UUU,RFX4,LOC105611569,LOC101115112,PRPH,LOC105614148,LOC106990328,ABCC9,LOC101117744,R3HDM2,KMT2D,LOC105605372,GNS,ERGIC2,DNAJC22,LOC105614765,PA2G4,BICD1,FAR2,ERBB3,LOC105613670,LOC105613279,LOC101106928,CCDC91,LOC101103465,MTERF2,LOC101104739,LOC101106764,SPRYD4,ARHGEF25,NEMP1,CCT2,LOC105614919,LOC105614778,TXN2,LOC105609952,ORMDL2,DNM1L,LOC101107947,SARNP,M…
3	147634501	147635500	134354373	194127767	Milk fat percentage QTL (57739)	LOC101117240,LOC105614917,NTN4,TRNAK-UUU,RFX4,LOC105611569,LOC101115112,PRPH,LOC105614148,LOC106990328,ABCC9,LOC101117744,R3HDM2,KMT2D,LOC105605372,GNS,ERGIC2,DNAJC22,LOC105614765,PA2G4,BICD1,FAR2,ERBB3,LOC105613670,LOC105613279,LOC101106928,CCDC91,LOC101103465,MTERF2,LOC101104739,LOC101106764,SPRYD4,ARHGEF25,NEMP1,CCT2,LOC105614919,LOC105614778,TXN2,LOC105609952,ORMDL2,DNM1L,LOC101107947,SARNP,M…
3	149307001	149312700	134354373	194127767	Milk fat percentage QTL (57739)	LOC101117240,LOC105614917,NTN4,TRNAK-UUU,RFX4,LOC105611569,LOC101115112,PRPH,LOC105614148,LOC106990328,ABCC9,LOC101117744,R3HDM2,KMT2D,LOC105605372,GNS,ERGIC2,DNAJC22,LOC105614765,PA2G4,BICD1,FAR2,ERBB3,LOC105613670,LOC105613279,LOC101106928,CCDC91,LOC101103465,MTERF2,LOC101104739,LOC101106764,SPRYD4,ARHGEF25,NEMP1,CCT2,LOC105614919,LOC105614778,TXN2,LOC105609952,ORMDL2,DNM1L,LOC101107947,SARNP,M…
3	149327401	149329200	134354373	194127767	Milk fat percentage QTL (57739)	LOC101117240,LOC105614917,NTN4,TRNAK-UUU,RFX4,LOC105611569,LOC101115112,PRPH,LOC105614148,LOC106990328,ABCC9,LOC101117744,R3HDM2,KMT2D,LOC105605372,GNS,ERGIC2,DNAJC22,LOC105614765,PA2G4,BICD1,FAR2,ERBB3,LOC105613670,LOC105613279,LOC101106928,CCDC91,LOC101103465,MTERF2,LOC101104739,LOC101106764,SPRYD4,ARHGEF25,NEMP1,CCT2,LOC105614919,LOC105614778,TXN2,LOC105609952,ORMDL2,DNM1L,LOC101107947,SARNP,M…
3	149778001	149779000	134354373	194127767	Milk fat percentage QTL (57739)	LOC101117240,LOC105614917,NTN4,TRNAK-UUU,RFX4,LOC105611569,LOC101115112,PRPH,LOC105614148,LOC106990328,ABCC9,LOC101117744,R3HDM2,KMT2D,LOC105605372,GNS,ERGIC2,DNAJC22,LOC105614765,PA2G4,BICD1,FAR2,ERBB3,LOC105613670,LOC105613279,LOC101106928,CCDC91,LOC101103465,MTERF2,LOC101104739,LOC101106764,SPRYD4,ARHGEF25,NEMP1,CCT2,LOC105614919,LOC105614778,TXN2,LOC105609952,ORMDL2,DNM1L,LOC101107947,SARNP,M…
3	150079801	150080800	134354373	194127767	Milk fat percentage QTL (57739)	LOC101117240,LOC105614917,NTN4,TRNAK-UUU,RFX4,LOC105611569,LOC101115112,PRPH,LOC105614148,LOC106990328,ABCC9,LOC101117744,R3HDM2,KMT2D,LOC105605372,GNS,ERGIC2,DNAJC22,LOC105614765,PA2G4,BICD1,FAR2,ERBB3,LOC105613670,LOC105613279,LOC101106928,CCDC91,LOC101103465,MTERF2,LOC101104739,LOC101106764,SPRYD4,ARHGEF25,NEMP1,CCT2,LOC105614919,LOC105614778,TXN2,LOC105609952,ORMDL2,DNM1L,LOC101107947,SARNP,M…
3	150619501	150620500	134354373	194127767	Milk fat percentage QTL (57739)	LOC101117240,LOC105614917,NTN4,TRNAK-UUU,RFX4,LOC105611569,LOC101115112,PRPH,LOC105614148,LOC106990328,ABCC9,LOC101117744,R3HDM2,KMT2D,LOC105605372,GNS,ERGIC2,DNAJC22,LOC105614765,PA2G4,BICD1,FAR2,ERBB3,LOC105613670,LOC105613279,LOC101106928,CCDC91,LOC101103465,MTERF2,LOC101104739,LOC101106764,SPRYD4,ARHGEF25,NEMP1,CCT2,LOC105614919,LOC105614778,TXN2,LOC105609952,ORMDL2,DNM1L,LOC101107947,SARNP,M…
3	150994901	150995900	134354373	194127767	Milk fat percentage QTL (57739)	LOC101117240,LOC105614917,NTN4,TRNAK-UUU,RFX4,LOC105611569,LOC101115112,PRPH,LOC105614148,LOC106990328,ABCC9,LOC101117744,R3HDM2,KMT2D,LOC105605372,GNS,ERGIC2,DNAJC22,LOC105614765,PA2G4,BICD1,FAR2,ERBB3,LOC105613670,LOC105613279,LOC101106928,CCDC91,LOC101103465,MTERF2,LOC101104739,LOC101106764,SPRYD4,ARHGEF25,NEMP1,CCT2,LOC105614919,LOC105614778,TXN2,LOC105609952,ORMDL2,DNM1L,LOC101107947,SARNP,M…
3	151157901	151158900	134354373	194127767	Milk fat percentage QTL (57739)	LOC101117240,LOC105614917,NTN4,TRNAK-UUU,RFX4,LOC105611569,LOC101115112,PRPH,LOC105614148,LOC106990328,ABCC9,LOC101117744,R3HDM2,KMT2D,LOC105605372,GNS,ERGIC2,DNAJC22,LOC105614765,PA2G4,BICD1,FAR2,ERBB3,LOC105613670,LOC105613279,LOC101106928,CCDC91,LOC101103465,MTERF2,LOC101104739,LOC101106764,SPRYD4,ARHGEF25,NEMP1,CCT2,LOC105614919,LOC105614778,TXN2,LOC105609952,ORMDL2,DNM1L,LOC101107947,SARNP,M…
3	151306301	151308800	134354373	194127767	Milk fat percentage QTL (57739)	LOC101117240,LOC105614917,NTN4,TRNAK-UUU,RFX4,LOC105611569,LOC101115112,PRPH,LOC105614148,LOC106990328,ABCC9,LOC101117744,R3HDM2,KMT2D,LOC105605372,GNS,ERGIC2,DNAJC22,LOC105614765,PA2G4,BICD1,FAR2,ERBB3,LOC105613670,LOC105613279,LOC101106928,CCDC91,LOC101103465,MTERF2,LOC101104739,LOC101106764,SPRYD4,ARHGEF25,NEMP1,CCT2,LOC105614919,LOC105614778,TXN2,LOC105609952,ORMDL2,DNM1L,LOC101107947,SARNP,M…
3	151323801	151325400	134354373	194127767	Milk fat percentage QTL (57739)	LOC101117240,LOC105614917,NTN4,TRNAK-UUU,RFX4,LOC105611569,LOC101115112,PRPH,LOC105614148,LOC106990328,ABCC9,LOC101117744,R3HDM2,KMT2D,LOC105605372,GNS,ERGIC2,DNAJC22,LOC105614765,PA2G4,BICD1,FAR2,ERBB3,LOC105613670,LOC105613279,LOC101106928,CCDC91,LOC101103465,MTERF2,LOC101104739,LOC101106764,SPRYD4,ARHGEF25,NEMP1,CCT2,LOC105614919,LOC105614778,TXN2,LOC105609952,ORMDL2,DNM1L,LOC101107947,SARNP,M…
3	151373101	151374800	134354373	194127767	Milk fat percentage QTL (57739)	LOC101117240,LOC105614917,NTN4,TRNAK-UUU,RFX4,LOC105611569,LOC101115112,PRPH,LOC105614148,LOC106990328,ABCC9,LOC101117744,R3HDM2,KMT2D,LOC105605372,GNS,ERGIC2,DNAJC22,LOC105614765,PA2G4,BICD1,FAR2,ERBB3,LOC105613670,LOC105613279,LOC101106928,CCDC91,LOC101103465,MTERF2,LOC101104739,LOC101106764,SPRYD4,ARHGEF25,NEMP1,CCT2,LOC105614919,LOC105614778,TXN2,LOC105609952,ORMDL2,DNM1L,LOC101107947,SARNP,M…
3	151496001	151497100	134354373	194127767	Milk fat percentage QTL (57739)	LOC101117240,LOC105614917,NTN4,TRNAK-UUU,RFX4,LOC105611569,LOC101115112,PRPH,LOC105614148,LOC106990328,ABCC9,LOC101117744,R3HDM2,KMT2D,LOC105605372,GNS,ERGIC2,DNAJC22,LOC105614765,PA2G4,BICD1,FAR2,ERBB3,LOC105613670,LOC105613279,LOC101106928,CCDC91,LOC101103465,MTERF2,LOC101104739,LOC101106764,SPRYD4,ARHGEF25,NEMP1,CCT2,LOC105614919,LOC105614778,TXN2,LOC105609952,ORMDL2,DNM1L,LOC101107947,SARNP,M…
3	151753301	151754400	134354373	194127767	Milk fat percentage QTL (57739)	LOC101117240,LOC105614917,NTN4,TRNAK-UUU,RFX4,LOC105611569,LOC101115112,PRPH,LOC105614148,LOC106990328,ABCC9,LOC101117744,R3HDM2,KMT2D,LOC105605372,GNS,ERGIC2,DNAJC22,LOC105614765,PA2G4,BICD1,FAR2,ERBB3,LOC105613670,LOC105613279,LOC101106928,CCDC91,LOC101103465,MTERF2,LOC101104739,LOC101106764,SPRYD4,ARHGEF25,NEMP1,CCT2,LOC105614919,LOC105614778,TXN2,LOC105609952,ORMDL2,DNM1L,LOC101107947,SARNP,M…
3	152300701	152302500	134354373	194127767	Milk fat percentage QTL (57739)	LOC101117240,LOC105614917,NTN4,TRNAK-UUU,RFX4,LOC105611569,LOC101115112,PRPH,LOC105614148,LOC106990328,ABCC9,LOC101117744,R3HDM2,KMT2D,LOC105605372,GNS,ERGIC2,DNAJC22,LOC105614765,PA2G4,BICD1,FAR2,ERBB3,LOC105613670,LOC105613279,LOC101106928,CCDC91,LOC101103465,MTERF2,LOC101104739,LOC101106764,SPRYD4,ARHGEF25,NEMP1,CCT2,LOC105614919,LOC105614778,TXN2,LOC105609952,ORMDL2,DNM1L,LOC101107947,SARNP,M…
3	152441401	152443000	134354373	194127767	Milk fat percentage QTL (57739)	LOC101117240,LOC105614917,NTN4,TRNAK-UUU,RFX4,LOC105611569,LOC101115112,PRPH,LOC105614148,LOC106990328,ABCC9,LOC101117744,R3HDM2,KMT2D,LOC105605372,GNS,ERGIC2,DNAJC22,LOC105614765,PA2G4,BICD1,FAR2,ERBB3,LOC105613670,LOC105613279,LOC101106928,CCDC91,LOC101103465,MTERF2,LOC101104739,LOC101106764,SPRYD4,ARHGEF25,NEMP1,CCT2,LOC105614919,LOC105614778,TXN2,LOC105609952,ORMDL2,DNM1L,LOC101107947,SARNP,M…
3	152450901	152452200	134354373	194127767	Milk fat percentage QTL (57739)	LOC101117240,LOC105614917,NTN4,TRNAK-UUU,RFX4,LOC105611569,LOC101115112,PRPH,LOC105614148,LOC106990328,ABCC9,LOC101117744,R3HDM2,KMT2D,LOC105605372,GNS,ERGIC2,DNAJC22,LOC105614765,PA2G4,BICD1,FAR2,ERBB3,LOC105613670,LOC105613279,LOC101106928,CCDC91,LOC101103465,MTERF2,LOC101104739,LOC101106764,SPRYD4,ARHGEF25,NEMP1,CCT2,LOC105614919,LOC105614778,TXN2,LOC105609952,ORMDL2,DNM1L,LOC101107947,SARNP,M…
3	152985701	152986900	134354373	194127767	Milk fat percentage QTL (57739)	LOC101117240,LOC105614917,NTN4,TRNAK-UUU,RFX4,LOC105611569,LOC101115112,PRPH,LOC105614148,LOC106990328,ABCC9,LOC101117744,R3HDM2,KMT2D,LOC105605372,GNS,ERGIC2,DNAJC22,LOC105614765,PA2G4,BICD1,FAR2,ERBB3,LOC105613670,LOC105613279,LOC101106928,CCDC91,LOC101103465,MTERF2,LOC101104739,LOC101106764,SPRYD4,ARHGEF25,NEMP1,CCT2,LOC105614919,LOC105614778,TXN2,LOC105609952,ORMDL2,DNM1L,LOC101107947,SARNP,M…
3	153240101	153242300	134354373	194127767	Milk fat percentage QTL (57739)	LOC101117240,LOC105614917,NTN4,TRNAK-UUU,RFX4,LOC105611569,LOC101115112,PRPH,LOC105614148,LOC106990328,ABCC9,LOC101117744,R3HDM2,KMT2D,LOC105605372,GNS,ERGIC2,DNAJC22,LOC105614765,PA2G4,BICD1,FAR2,ERBB3,LOC105613670,LOC105613279,LOC101106928,CCDC91,LOC101103465,MTERF2,LOC101104739,LOC101106764,SPRYD4,ARHGEF25,NEMP1,CCT2,LOC105614919,LOC105614778,TXN2,LOC105609952,ORMDL2,DNM1L,LOC101107947,SARNP,M…
3	153992701	153994300	153976304	154082414	Tail fat deposition QTL (127000)	MSRB3
3	154953401	154958500	134354373	194127767	Milk fat percentage QTL (57739)	LOC101117240,LOC105614917,NTN4,TRNAK-UUU,RFX4,LOC105611569,LOC101115112,PRPH,LOC105614148,LOC106990328,ABCC9,LOC101117744,R3HDM2,KMT2D,LOC105605372,GNS,ERGIC2,DNAJC22,LOC105614765,PA2G4,BICD1,FAR2,ERBB3,LOC105613670,LOC105613279,LOC101106928,CCDC91,LOC101103465,MTERF2,LOC101104739,LOC101106764,SPRYD4,ARHGEF25,NEMP1,CCT2,LOC105614919,LOC105614778,TXN2,LOC105609952,ORMDL2,DNM1L,LOC101107947,SARNP,M…
3	155749901	155752200	134354373	194127767	Milk fat percentage QTL (57739)	LOC101117240,LOC105614917,NTN4,TRNAK-UUU,RFX4,LOC105611569,LOC101115112,PRPH,LOC105614148,LOC106990328,ABCC9,LOC101117744,R3HDM2,KMT2D,LOC105605372,GNS,ERGIC2,DNAJC22,LOC105614765,PA2G4,BICD1,FAR2,ERBB3,LOC105613670,LOC105613279,LOC101106928,CCDC91,LOC101103465,MTERF2,LOC101104739,LOC101106764,SPRYD4,ARHGEF25,NEMP1,CCT2,LOC105614919,LOC105614778,TXN2,LOC105609952,ORMDL2,DNM1L,LOC101107947,SARNP,M…
3	155935001	155936000	134354373	194127767	Milk fat percentage QTL (57739)	LOC101117240,LOC105614917,NTN4,TRNAK-UUU,RFX4,LOC105611569,LOC101115112,PRPH,LOC105614148,LOC106990328,ABCC9,LOC101117744,R3HDM2,KMT2D,LOC105605372,GNS,ERGIC2,DNAJC22,LOC105614765,PA2G4,BICD1,FAR2,ERBB3,LOC105613670,LOC105613279,LOC101106928,CCDC91,LOC101103465,MTERF2,LOC101104739,LOC101106764,SPRYD4,ARHGEF25,NEMP1,CCT2,LOC105614919,LOC105614778,TXN2,LOC105609952,ORMDL2,DNM1L,LOC101107947,SARNP,M…
3	156143601	156145200	134354373	194127767	Milk fat percentage QTL (57739)	LOC101117240,LOC105614917,NTN4,TRNAK-UUU,RFX4,LOC105611569,LOC101115112,PRPH,LOC105614148,LOC106990328,ABCC9,LOC101117744,R3HDM2,KMT2D,LOC105605372,GNS,ERGIC2,DNAJC22,LOC105614765,PA2G4,BICD1,FAR2,ERBB3,LOC105613670,LOC105613279,LOC101106928,CCDC91,LOC101103465,MTERF2,LOC101104739,LOC101106764,SPRYD4,ARHGEF25,NEMP1,CCT2,LOC105614919,LOC105614778,TXN2,LOC105609952,ORMDL2,DNM1L,LOC101107947,SARNP,M…
3	156248001	156253800	134354373	194127767	Milk fat percentage QTL (57739)	LOC101117240,LOC105614917,NTN4,TRNAK-UUU,RFX4,LOC105611569,LOC101115112,PRPH,LOC105614148,LOC106990328,ABCC9,LOC101117744,R3HDM2,KMT2D,LOC105605372,GNS,ERGIC2,DNAJC22,LOC105614765,PA2G4,BICD1,FAR2,ERBB3,LOC105613670,LOC105613279,LOC101106928,CCDC91,LOC101103465,MTERF2,LOC101104739,LOC101106764,SPRYD4,ARHGEF25,NEMP1,CCT2,LOC105614919,LOC105614778,TXN2,LOC105609952,ORMDL2,DNM1L,LOC101107947,SARNP,M…
3	156431001	156432000	134354373	194127767	Milk fat percentage QTL (57739)	LOC101117240,LOC105614917,NTN4,TRNAK-UUU,RFX4,LOC105611569,LOC101115112,PRPH,LOC105614148,LOC106990328,ABCC9,LOC101117744,R3HDM2,KMT2D,LOC105605372,GNS,ERGIC2,DNAJC22,LOC105614765,PA2G4,BICD1,FAR2,ERBB3,LOC105613670,LOC105613279,LOC101106928,CCDC91,LOC101103465,MTERF2,LOC101104739,LOC101106764,SPRYD4,ARHGEF25,NEMP1,CCT2,LOC105614919,LOC105614778,TXN2,LOC105609952,ORMDL2,DNM1L,LOC101107947,SARNP,M…
3	156838501	156839700	134354373	194127767	Milk fat percentage QTL (57739)	LOC101117240,LOC105614917,NTN4,TRNAK-UUU,RFX4,LOC105611569,LOC101115112,PRPH,LOC105614148,LOC106990328,ABCC9,LOC101117744,R3HDM2,KMT2D,LOC105605372,GNS,ERGIC2,DNAJC22,LOC105614765,PA2G4,BICD1,FAR2,ERBB3,LOC105613670,LOC105613279,LOC101106928,CCDC91,LOC101103465,MTERF2,LOC101104739,LOC101106764,SPRYD4,ARHGEF25,NEMP1,CCT2,LOC105614919,LOC105614778,TXN2,LOC105609952,ORMDL2,DNM1L,LOC101107947,SARNP,M…
3	157016501	157018000	134354373	194127767	Milk fat percentage QTL (57739)	LOC101117240,LOC105614917,NTN4,TRNAK-UUU,RFX4,LOC105611569,LOC101115112,PRPH,LOC105614148,LOC106990328,ABCC9,LOC101117744,R3HDM2,KMT2D,LOC105605372,GNS,ERGIC2,DNAJC22,LOC105614765,PA2G4,BICD1,FAR2,ERBB3,LOC105613670,LOC105613279,LOC101106928,CCDC91,LOC101103465,MTERF2,LOC101104739,LOC101106764,SPRYD4,ARHGEF25,NEMP1,CCT2,LOC105614919,LOC105614778,TXN2,LOC105609952,ORMDL2,DNM1L,LOC101107947,SARNP,M…
3	157548601	157549900	134354373	194127767	Milk fat percentage QTL (57739)	LOC101117240,LOC105614917,NTN4,TRNAK-UUU,RFX4,LOC105611569,LOC101115112,PRPH,LOC105614148,LOC106990328,ABCC9,LOC101117744,R3HDM2,KMT2D,LOC105605372,GNS,ERGIC2,DNAJC22,LOC105614765,PA2G4,BICD1,FAR2,ERBB3,LOC105613670,LOC105613279,LOC101106928,CCDC91,LOC101103465,MTERF2,LOC101104739,LOC101106764,SPRYD4,ARHGEF25,NEMP1,CCT2,LOC105614919,LOC105614778,TXN2,LOC105609952,ORMDL2,DNM1L,LOC101107947,SARNP,M…
3	158258101	158260300	134354373	194127767	Milk fat percentage QTL (57739)	LOC101117240,LOC105614917,NTN4,TRNAK-UUU,RFX4,LOC105611569,LOC101115112,PRPH,LOC105614148,LOC106990328,ABCC9,LOC101117744,R3HDM2,KMT2D,LOC105605372,GNS,ERGIC2,DNAJC22,LOC105614765,PA2G4,BICD1,FAR2,ERBB3,LOC105613670,LOC105613279,LOC101106928,CCDC91,LOC101103465,MTERF2,LOC101104739,LOC101106764,SPRYD4,ARHGEF25,NEMP1,CCT2,LOC105614919,LOC105614778,TXN2,LOC105609952,ORMDL2,DNM1L,LOC101107947,SARNP,M…
3	158608201	158609400	134354373	194127767	Milk fat percentage QTL (57739)	LOC101117240,LOC105614917,NTN4,TRNAK-UUU,RFX4,LOC105611569,LOC101115112,PRPH,LOC105614148,LOC106990328,ABCC9,LOC101117744,R3HDM2,KMT2D,LOC105605372,GNS,ERGIC2,DNAJC22,LOC105614765,PA2G4,BICD1,FAR2,ERBB3,LOC105613670,LOC105613279,LOC101106928,CCDC91,LOC101103465,MTERF2,LOC101104739,LOC101106764,SPRYD4,ARHGEF25,NEMP1,CCT2,LOC105614919,LOC105614778,TXN2,LOC105609952,ORMDL2,DNM1L,LOC101107947,SARNP,M…
3	158646901	158648100	134354373	194127767	Milk fat percentage QTL (57739)	LOC101117240,LOC105614917,NTN4,TRNAK-UUU,RFX4,LOC105611569,LOC101115112,PRPH,LOC105614148,LOC106990328,ABCC9,LOC101117744,R3HDM2,KMT2D,LOC105605372,GNS,ERGIC2,DNAJC22,LOC105614765,PA2G4,BICD1,FAR2,ERBB3,LOC105613670,LOC105613279,LOC101106928,CCDC91,LOC101103465,MTERF2,LOC101104739,LOC101106764,SPRYD4,ARHGEF25,NEMP1,CCT2,LOC105614919,LOC105614778,TXN2,LOC105609952,ORMDL2,DNM1L,LOC101107947,SARNP,M…
3	159237301	159242500	134354373	194127767	Milk fat percentage QTL (57739)	LOC101117240,LOC105614917,NTN4,TRNAK-UUU,RFX4,LOC105611569,LOC101115112,PRPH,LOC105614148,LOC106990328,ABCC9,LOC101117744,R3HDM2,KMT2D,LOC105605372,GNS,ERGIC2,DNAJC22,LOC105614765,PA2G4,BICD1,FAR2,ERBB3,LOC105613670,LOC105613279,LOC101106928,CCDC91,LOC101103465,MTERF2,LOC101104739,LOC101106764,SPRYD4,ARHGEF25,NEMP1,CCT2,LOC105614919,LOC105614778,TXN2,LOC105609952,ORMDL2,DNM1L,LOC101107947,SARNP,M…
3	160040601	160041800	134354373	194127767	Milk fat percentage QTL (57739)	LOC101117240,LOC105614917,NTN4,TRNAK-UUU,RFX4,LOC105611569,LOC101115112,PRPH,LOC105614148,LOC106990328,ABCC9,LOC101117744,R3HDM2,KMT2D,LOC105605372,GNS,ERGIC2,DNAJC22,LOC105614765,PA2G4,BICD1,FAR2,ERBB3,LOC105613670,LOC105613279,LOC101106928,CCDC91,LOC101103465,MTERF2,LOC101104739,LOC101106764,SPRYD4,ARHGEF25,NEMP1,CCT2,LOC105614919,LOC105614778,TXN2,LOC105609952,ORMDL2,DNM1L,LOC101107947,SARNP,M…
3	160739001	160744400	134354373	194127767	Milk fat percentage QTL (57739)	LOC101117240,LOC105614917,NTN4,TRNAK-UUU,RFX4,LOC105611569,LOC101115112,PRPH,LOC105614148,LOC106990328,ABCC9,LOC101117744,R3HDM2,KMT2D,LOC105605372,GNS,ERGIC2,DNAJC22,LOC105614765,PA2G4,BICD1,FAR2,ERBB3,LOC105613670,LOC105613279,LOC101106928,CCDC91,LOC101103465,MTERF2,LOC101104739,LOC101106764,SPRYD4,ARHGEF25,NEMP1,CCT2,LOC105614919,LOC105614778,TXN2,LOC105609952,ORMDL2,DNM1L,LOC101107947,SARNP,M…
3	160878801	160879800	134354373	194127767	Milk fat percentage QTL (57739)	LOC101117240,LOC105614917,NTN4,TRNAK-UUU,RFX4,LOC105611569,LOC101115112,PRPH,LOC105614148,LOC106990328,ABCC9,LOC101117744,R3HDM2,KMT2D,LOC105605372,GNS,ERGIC2,DNAJC22,LOC105614765,PA2G4,BICD1,FAR2,ERBB3,LOC105613670,LOC105613279,LOC101106928,CCDC91,LOC101103465,MTERF2,LOC101104739,LOC101106764,SPRYD4,ARHGEF25,NEMP1,CCT2,LOC105614919,LOC105614778,TXN2,LOC105609952,ORMDL2,DNM1L,LOC101107947,SARNP,M…
3	161047601	161049600	134354373	194127767	Milk fat percentage QTL (57739)	LOC101117240,LOC105614917,NTN4,TRNAK-UUU,RFX4,LOC105611569,LOC101115112,PRPH,LOC105614148,LOC106990328,ABCC9,LOC101117744,R3HDM2,KMT2D,LOC105605372,GNS,ERGIC2,DNAJC22,LOC105614765,PA2G4,BICD1,FAR2,ERBB3,LOC105613670,LOC105613279,LOC101106928,CCDC91,LOC101103465,MTERF2,LOC101104739,LOC101106764,SPRYD4,ARHGEF25,NEMP1,CCT2,LOC105614919,LOC105614778,TXN2,LOC105609952,ORMDL2,DNM1L,LOC101107947,SARNP,M…
3	161497701	161500400	134354373	194127767	Milk fat percentage QTL (57739)	LOC101117240,LOC105614917,NTN4,TRNAK-UUU,RFX4,LOC105611569,LOC101115112,PRPH,LOC105614148,LOC106990328,ABCC9,LOC101117744,R3HDM2,KMT2D,LOC105605372,GNS,ERGIC2,DNAJC22,LOC105614765,PA2G4,BICD1,FAR2,ERBB3,LOC105613670,LOC105613279,LOC101106928,CCDC91,LOC101103465,MTERF2,LOC101104739,LOC101106764,SPRYD4,ARHGEF25,NEMP1,CCT2,LOC105614919,LOC105614778,TXN2,LOC105609952,ORMDL2,DNM1L,LOC101107947,SARNP,M…
3	161818501	161819900	134354373	194127767	Milk fat percentage QTL (57739)	LOC101117240,LOC105614917,NTN4,TRNAK-UUU,RFX4,LOC105611569,LOC101115112,PRPH,LOC105614148,LOC106990328,ABCC9,LOC101117744,R3HDM2,KMT2D,LOC105605372,GNS,ERGIC2,DNAJC22,LOC105614765,PA2G4,BICD1,FAR2,ERBB3,LOC105613670,LOC105613279,LOC101106928,CCDC91,LOC101103465,MTERF2,LOC101104739,LOC101106764,SPRYD4,ARHGEF25,NEMP1,CCT2,LOC105614919,LOC105614778,TXN2,LOC105609952,ORMDL2,DNM1L,LOC101107947,SARNP,M…
3	162208201	162209200	134354373	194127767	Milk fat percentage QTL (57739)	LOC101117240,LOC105614917,NTN4,TRNAK-UUU,RFX4,LOC105611569,LOC101115112,PRPH,LOC105614148,LOC106990328,ABCC9,LOC101117744,R3HDM2,KMT2D,LOC105605372,GNS,ERGIC2,DNAJC22,LOC105614765,PA2G4,BICD1,FAR2,ERBB3,LOC105613670,LOC105613279,LOC101106928,CCDC91,LOC101103465,MTERF2,LOC101104739,LOC101106764,SPRYD4,ARHGEF25,NEMP1,CCT2,LOC105614919,LOC105614778,TXN2,LOC105609952,ORMDL2,DNM1L,LOC101107947,SARNP,M…
3	162244901	162249300	134354373	194127767	Milk fat percentage QTL (57739)	LOC101117240,LOC105614917,NTN4,TRNAK-UUU,RFX4,LOC105611569,LOC101115112,PRPH,LOC105614148,LOC106990328,ABCC9,LOC101117744,R3HDM2,KMT2D,LOC105605372,GNS,ERGIC2,DNAJC22,LOC105614765,PA2G4,BICD1,FAR2,ERBB3,LOC105613670,LOC105613279,LOC101106928,CCDC91,LOC101103465,MTERF2,LOC101104739,LOC101106764,SPRYD4,ARHGEF25,NEMP1,CCT2,LOC105614919,LOC105614778,TXN2,LOC105609952,ORMDL2,DNM1L,LOC101107947,SARNP,M…
3	163005601	163006700	134354373	194127767	Milk fat percentage QTL (57739)	LOC101117240,LOC105614917,NTN4,TRNAK-UUU,RFX4,LOC105611569,LOC101115112,PRPH,LOC105614148,LOC106990328,ABCC9,LOC101117744,R3HDM2,KMT2D,LOC105605372,GNS,ERGIC2,DNAJC22,LOC105614765,PA2G4,BICD1,FAR2,ERBB3,LOC105613670,LOC105613279,LOC101106928,CCDC91,LOC101103465,MTERF2,LOC101104739,LOC101106764,SPRYD4,ARHGEF25,NEMP1,CCT2,LOC105614919,LOC105614778,TXN2,LOC105609952,ORMDL2,DNM1L,LOC101107947,SARNP,M…
3	163120701	163124200	134354373	194127767	Milk fat percentage QTL (57739)	LOC101117240,LOC105614917,NTN4,TRNAK-UUU,RFX4,LOC105611569,LOC101115112,PRPH,LOC105614148,LOC106990328,ABCC9,LOC101117744,R3HDM2,KMT2D,LOC105605372,GNS,ERGIC2,DNAJC22,LOC105614765,PA2G4,BICD1,FAR2,ERBB3,LOC105613670,LOC105613279,LOC101106928,CCDC91,LOC101103465,MTERF2,LOC101104739,LOC101106764,SPRYD4,ARHGEF25,NEMP1,CCT2,LOC105614919,LOC105614778,TXN2,LOC105609952,ORMDL2,DNM1L,LOC101107947,SARNP,M…
3	163535901	163537200	134354373	194127767	Milk fat percentage QTL (57739)	LOC101117240,LOC105614917,NTN4,TRNAK-UUU,RFX4,LOC105611569,LOC101115112,PRPH,LOC105614148,LOC106990328,ABCC9,LOC101117744,R3HDM2,KMT2D,LOC105605372,GNS,ERGIC2,DNAJC22,LOC105614765,PA2G4,BICD1,FAR2,ERBB3,LOC105613670,LOC105613279,LOC101106928,CCDC91,LOC101103465,MTERF2,LOC101104739,LOC101106764,SPRYD4,ARHGEF25,NEMP1,CCT2,LOC105614919,LOC105614778,TXN2,LOC105609952,ORMDL2,DNM1L,LOC101107947,SARNP,M…
3	163714901	163716200	134354373	194127767	Milk fat percentage QTL (57739)	LOC101117240,LOC105614917,NTN4,TRNAK-UUU,RFX4,LOC105611569,LOC101115112,PRPH,LOC105614148,LOC106990328,ABCC9,LOC101117744,R3HDM2,KMT2D,LOC105605372,GNS,ERGIC2,DNAJC22,LOC105614765,PA2G4,BICD1,FAR2,ERBB3,LOC105613670,LOC105613279,LOC101106928,CCDC91,LOC101103465,MTERF2,LOC101104739,LOC101106764,SPRYD4,ARHGEF25,NEMP1,CCT2,LOC105614919,LOC105614778,TXN2,LOC105609952,ORMDL2,DNM1L,LOC101107947,SARNP,M…
3	164124701	164126200	134354373	194127767	Milk fat percentage QTL (57739)	LOC101117240,LOC105614917,NTN4,TRNAK-UUU,RFX4,LOC105611569,LOC101115112,PRPH,LOC105614148,LOC106990328,ABCC9,LOC101117744,R3HDM2,KMT2D,LOC105605372,GNS,ERGIC2,DNAJC22,LOC105614765,PA2G4,BICD1,FAR2,ERBB3,LOC105613670,LOC105613279,LOC101106928,CCDC91,LOC101103465,MTERF2,LOC101104739,LOC101106764,SPRYD4,ARHGEF25,NEMP1,CCT2,LOC105614919,LOC105614778,TXN2,LOC105609952,ORMDL2,DNM1L,LOC101107947,SARNP,M…
3	164285201	164286200	134354373	194127767	Milk fat percentage QTL (57739)	LOC101117240,LOC105614917,NTN4,TRNAK-UUU,RFX4,LOC105611569,LOC101115112,PRPH,LOC105614148,LOC106990328,ABCC9,LOC101117744,R3HDM2,KMT2D,LOC105605372,GNS,ERGIC2,DNAJC22,LOC105614765,PA2G4,BICD1,FAR2,ERBB3,LOC105613670,LOC105613279,LOC101106928,CCDC91,LOC101103465,MTERF2,LOC101104739,LOC101106764,SPRYD4,ARHGEF25,NEMP1,CCT2,LOC105614919,LOC105614778,TXN2,LOC105609952,ORMDL2,DNM1L,LOC101107947,SARNP,M…
3	164354101	164355200	134354373	194127767	Milk fat percentage QTL (57739)	LOC101117240,LOC105614917,NTN4,TRNAK-UUU,RFX4,LOC105611569,LOC101115112,PRPH,LOC105614148,LOC106990328,ABCC9,LOC101117744,R3HDM2,KMT2D,LOC105605372,GNS,ERGIC2,DNAJC22,LOC105614765,PA2G4,BICD1,FAR2,ERBB3,LOC105613670,LOC105613279,LOC101106928,CCDC91,LOC101103465,MTERF2,LOC101104739,LOC101106764,SPRYD4,ARHGEF25,NEMP1,CCT2,LOC105614919,LOC105614778,TXN2,LOC105609952,ORMDL2,DNM1L,LOC101107947,SARNP,M…
3	164464701	164465800	134354373	194127767	Milk fat percentage QTL (57739)	LOC101117240,LOC105614917,NTN4,TRNAK-UUU,RFX4,LOC105611569,LOC101115112,PRPH,LOC105614148,LOC106990328,ABCC9,LOC101117744,R3HDM2,KMT2D,LOC105605372,GNS,ERGIC2,DNAJC22,LOC105614765,PA2G4,BICD1,FAR2,ERBB3,LOC105613670,LOC105613279,LOC101106928,CCDC91,LOC101103465,MTERF2,LOC101104739,LOC101106764,SPRYD4,ARHGEF25,NEMP1,CCT2,LOC105614919,LOC105614778,TXN2,LOC105609952,ORMDL2,DNM1L,LOC101107947,SARNP,M…
3	164496901	164504400	134354373	194127767	Milk fat percentage QTL (57739)	LOC101117240,LOC105614917,NTN4,TRNAK-UUU,RFX4,LOC105611569,LOC101115112,PRPH,LOC105614148,LOC106990328,ABCC9,LOC101117744,R3HDM2,KMT2D,LOC105605372,GNS,ERGIC2,DNAJC22,LOC105614765,PA2G4,BICD1,FAR2,ERBB3,LOC105613670,LOC105613279,LOC101106928,CCDC91,LOC101103465,MTERF2,LOC101104739,LOC101106764,SPRYD4,ARHGEF25,NEMP1,CCT2,LOC105614919,LOC105614778,TXN2,LOC105609952,ORMDL2,DNM1L,LOC101107947,SARNP,M…
3	164800701	164802300	134354373	194127767	Milk fat percentage QTL (57739)	LOC101117240,LOC105614917,NTN4,TRNAK-UUU,RFX4,LOC105611569,LOC101115112,PRPH,LOC105614148,LOC106990328,ABCC9,LOC101117744,R3HDM2,KMT2D,LOC105605372,GNS,ERGIC2,DNAJC22,LOC105614765,PA2G4,BICD1,FAR2,ERBB3,LOC105613670,LOC105613279,LOC101106928,CCDC91,LOC101103465,MTERF2,LOC101104739,LOC101106764,SPRYD4,ARHGEF25,NEMP1,CCT2,LOC105614919,LOC105614778,TXN2,LOC105609952,ORMDL2,DNM1L,LOC101107947,SARNP,M…
3	165543701	165544800	134354373	194127767	Milk fat percentage QTL (57739)	LOC101117240,LOC105614917,NTN4,TRNAK-UUU,RFX4,LOC105611569,LOC101115112,PRPH,LOC105614148,LOC106990328,ABCC9,LOC101117744,R3HDM2,KMT2D,LOC105605372,GNS,ERGIC2,DNAJC22,LOC105614765,PA2G4,BICD1,FAR2,ERBB3,LOC105613670,LOC105613279,LOC101106928,CCDC91,LOC101103465,MTERF2,LOC101104739,LOC101106764,SPRYD4,ARHGEF25,NEMP1,CCT2,LOC105614919,LOC105614778,TXN2,LOC105609952,ORMDL2,DNM1L,LOC101107947,SARNP,M…
3	165875501	165876600	134354373	194127767	Milk fat percentage QTL (57739)	LOC101117240,LOC105614917,NTN4,TRNAK-UUU,RFX4,LOC105611569,LOC101115112,PRPH,LOC105614148,LOC106990328,ABCC9,LOC101117744,R3HDM2,KMT2D,LOC105605372,GNS,ERGIC2,DNAJC22,LOC105614765,PA2G4,BICD1,FAR2,ERBB3,LOC105613670,LOC105613279,LOC101106928,CCDC91,LOC101103465,MTERF2,LOC101104739,LOC101106764,SPRYD4,ARHGEF25,NEMP1,CCT2,LOC105614919,LOC105614778,TXN2,LOC105609952,ORMDL2,DNM1L,LOC101107947,SARNP,M…
3	166421701	166422900	134354373	194127767	Milk fat percentage QTL (57739)	LOC101117240,LOC105614917,NTN4,TRNAK-UUU,RFX4,LOC105611569,LOC101115112,PRPH,LOC105614148,LOC106990328,ABCC9,LOC101117744,R3HDM2,KMT2D,LOC105605372,GNS,ERGIC2,DNAJC22,LOC105614765,PA2G4,BICD1,FAR2,ERBB3,LOC105613670,LOC105613279,LOC101106928,CCDC91,LOC101103465,MTERF2,LOC101104739,LOC101106764,SPRYD4,ARHGEF25,NEMP1,CCT2,LOC105614919,LOC105614778,TXN2,LOC105609952,ORMDL2,DNM1L,LOC101107947,SARNP,M…
3	166761301	166765200	134354373	194127767	Milk fat percentage QTL (57739)	LOC101117240,LOC105614917,NTN4,TRNAK-UUU,RFX4,LOC105611569,LOC101115112,PRPH,LOC105614148,LOC106990328,ABCC9,LOC101117744,R3HDM2,KMT2D,LOC105605372,GNS,ERGIC2,DNAJC22,LOC105614765,PA2G4,BICD1,FAR2,ERBB3,LOC105613670,LOC105613279,LOC101106928,CCDC91,LOC101103465,MTERF2,LOC101104739,LOC101106764,SPRYD4,ARHGEF25,NEMP1,CCT2,LOC105614919,LOC105614778,TXN2,LOC105609952,ORMDL2,DNM1L,LOC101107947,SARNP,M…
3	166790901	166791900	134354373	194127767	Milk fat percentage QTL (57739)	LOC101117240,LOC105614917,NTN4,TRNAK-UUU,RFX4,LOC105611569,LOC101115112,PRPH,LOC105614148,LOC106990328,ABCC9,LOC101117744,R3HDM2,KMT2D,LOC105605372,GNS,ERGIC2,DNAJC22,LOC105614765,PA2G4,BICD1,FAR2,ERBB3,LOC105613670,LOC105613279,LOC101106928,CCDC91,LOC101103465,MTERF2,LOC101104739,LOC101106764,SPRYD4,ARHGEF25,NEMP1,CCT2,LOC105614919,LOC105614778,TXN2,LOC105609952,ORMDL2,DNM1L,LOC101107947,SARNP,M…
3	167036101	167038100	134354373	194127767	Milk fat percentage QTL (57739)	LOC101117240,LOC105614917,NTN4,TRNAK-UUU,RFX4,LOC105611569,LOC101115112,PRPH,LOC105614148,LOC106990328,ABCC9,LOC101117744,R3HDM2,KMT2D,LOC105605372,GNS,ERGIC2,DNAJC22,LOC105614765,PA2G4,BICD1,FAR2,ERBB3,LOC105613670,LOC105613279,LOC101106928,CCDC91,LOC101103465,MTERF2,LOC101104739,LOC101106764,SPRYD4,ARHGEF25,NEMP1,CCT2,LOC105614919,LOC105614778,TXN2,LOC105609952,ORMDL2,DNM1L,LOC101107947,SARNP,M…
3	167618001	167619100	134354373	194127767	Milk fat percentage QTL (57739)	LOC101117240,LOC105614917,NTN4,TRNAK-UUU,RFX4,LOC105611569,LOC101115112,PRPH,LOC105614148,LOC106990328,ABCC9,LOC101117744,R3HDM2,KMT2D,LOC105605372,GNS,ERGIC2,DNAJC22,LOC105614765,PA2G4,BICD1,FAR2,ERBB3,LOC105613670,LOC105613279,LOC101106928,CCDC91,LOC101103465,MTERF2,LOC101104739,LOC101106764,SPRYD4,ARHGEF25,NEMP1,CCT2,LOC105614919,LOC105614778,TXN2,LOC105609952,ORMDL2,DNM1L,LOC101107947,SARNP,M…
3	168031201	168032200	134354373	194127767	Milk fat percentage QTL (57739)	LOC101117240,LOC105614917,NTN4,TRNAK-UUU,RFX4,LOC105611569,LOC101115112,PRPH,LOC105614148,LOC106990328,ABCC9,LOC101117744,R3HDM2,KMT2D,LOC105605372,GNS,ERGIC2,DNAJC22,LOC105614765,PA2G4,BICD1,FAR2,ERBB3,LOC105613670,LOC105613279,LOC101106928,CCDC91,LOC101103465,MTERF2,LOC101104739,LOC101106764,SPRYD4,ARHGEF25,NEMP1,CCT2,LOC105614919,LOC105614778,TXN2,LOC105609952,ORMDL2,DNM1L,LOC101107947,SARNP,M…
3	168256601	168258300	134354373	194127767	Milk fat percentage QTL (57739)	LOC101117240,LOC105614917,NTN4,TRNAK-UUU,RFX4,LOC105611569,LOC101115112,PRPH,LOC105614148,LOC106990328,ABCC9,LOC101117744,R3HDM2,KMT2D,LOC105605372,GNS,ERGIC2,DNAJC22,LOC105614765,PA2G4,BICD1,FAR2,ERBB3,LOC105613670,LOC105613279,LOC101106928,CCDC91,LOC101103465,MTERF2,LOC101104739,LOC101106764,SPRYD4,ARHGEF25,NEMP1,CCT2,LOC105614919,LOC105614778,TXN2,LOC105609952,ORMDL2,DNM1L,LOC101107947,SARNP,M…
3	168695101	168696100	134354373	194127767	Milk fat percentage QTL (57739)	LOC101117240,LOC105614917,NTN4,TRNAK-UUU,RFX4,LOC105611569,LOC101115112,PRPH,LOC105614148,LOC106990328,ABCC9,LOC101117744,R3HDM2,KMT2D,LOC105605372,GNS,ERGIC2,DNAJC22,LOC105614765,PA2G4,BICD1,FAR2,ERBB3,LOC105613670,LOC105613279,LOC101106928,CCDC91,LOC101103465,MTERF2,LOC101104739,LOC101106764,SPRYD4,ARHGEF25,NEMP1,CCT2,LOC105614919,LOC105614778,TXN2,LOC105609952,ORMDL2,DNM1L,LOC101107947,SARNP,M…
3	169271601	169273900	134354373	194127767	Milk fat percentage QTL (57739)	LOC101117240,LOC105614917,NTN4,TRNAK-UUU,RFX4,LOC105611569,LOC101115112,PRPH,LOC105614148,LOC106990328,ABCC9,LOC101117744,R3HDM2,KMT2D,LOC105605372,GNS,ERGIC2,DNAJC22,LOC105614765,PA2G4,BICD1,FAR2,ERBB3,LOC105613670,LOC105613279,LOC101106928,CCDC91,LOC101103465,MTERF2,LOC101104739,LOC101106764,SPRYD4,ARHGEF25,NEMP1,CCT2,LOC105614919,LOC105614778,TXN2,LOC105609952,ORMDL2,DNM1L,LOC101107947,SARNP,M…
3	170559701	170562200	134354373	194127767	Milk fat percentage QTL (57739)	LOC101117240,LOC105614917,NTN4,TRNAK-UUU,RFX4,LOC105611569,LOC101115112,PRPH,LOC105614148,LOC106990328,ABCC9,LOC101117744,R3HDM2,KMT2D,LOC105605372,GNS,ERGIC2,DNAJC22,LOC105614765,PA2G4,BICD1,FAR2,ERBB3,LOC105613670,LOC105613279,LOC101106928,CCDC91,LOC101103465,MTERF2,LOC101104739,LOC101106764,SPRYD4,ARHGEF25,NEMP1,CCT2,LOC105614919,LOC105614778,TXN2,LOC105609952,ORMDL2,DNM1L,LOC101107947,SARNP,M…
3	171604201	171605400	134354373	194127767	Milk fat percentage QTL (57739)	LOC101117240,LOC105614917,NTN4,TRNAK-UUU,RFX4,LOC105611569,LOC101115112,PRPH,LOC105614148,LOC106990328,ABCC9,LOC101117744,R3HDM2,KMT2D,LOC105605372,GNS,ERGIC2,DNAJC22,LOC105614765,PA2G4,BICD1,FAR2,ERBB3,LOC105613670,LOC105613279,LOC101106928,CCDC91,LOC101103465,MTERF2,LOC101104739,LOC101106764,SPRYD4,ARHGEF25,NEMP1,CCT2,LOC105614919,LOC105614778,TXN2,LOC105609952,ORMDL2,DNM1L,LOC101107947,SARNP,M…
3	172697101	172699000	134354373	194127767	Milk fat percentage QTL (57739)	LOC101117240,LOC105614917,NTN4,TRNAK-UUU,RFX4,LOC105611569,LOC101115112,PRPH,LOC105614148,LOC106990328,ABCC9,LOC101117744,R3HDM2,KMT2D,LOC105605372,GNS,ERGIC2,DNAJC22,LOC105614765,PA2G4,BICD1,FAR2,ERBB3,LOC105613670,LOC105613279,LOC101106928,CCDC91,LOC101103465,MTERF2,LOC101104739,LOC101106764,SPRYD4,ARHGEF25,NEMP1,CCT2,LOC105614919,LOC105614778,TXN2,LOC105609952,ORMDL2,DNM1L,LOC101107947,SARNP,M…
3	174575101	174576800	134354373	194127767	Milk fat percentage QTL (57739)	LOC101117240,LOC105614917,NTN4,TRNAK-UUU,RFX4,LOC105611569,LOC101115112,PRPH,LOC105614148,LOC106990328,ABCC9,LOC101117744,R3HDM2,KMT2D,LOC105605372,GNS,ERGIC2,DNAJC22,LOC105614765,PA2G4,BICD1,FAR2,ERBB3,LOC105613670,LOC105613279,LOC101106928,CCDC91,LOC101103465,MTERF2,LOC101104739,LOC101106764,SPRYD4,ARHGEF25,NEMP1,CCT2,LOC105614919,LOC105614778,TXN2,LOC105609952,ORMDL2,DNM1L,LOC101107947,SARNP,M…
3	175189701	175190700	134354373	194127767	Milk fat percentage QTL (57739)	LOC101117240,LOC105614917,NTN4,TRNAK-UUU,RFX4,LOC105611569,LOC101115112,PRPH,LOC105614148,LOC106990328,ABCC9,LOC101117744,R3HDM2,KMT2D,LOC105605372,GNS,ERGIC2,DNAJC22,LOC105614765,PA2G4,BICD1,FAR2,ERBB3,LOC105613670,LOC105613279,LOC101106928,CCDC91,LOC101103465,MTERF2,LOC101104739,LOC101106764,SPRYD4,ARHGEF25,NEMP1,CCT2,LOC105614919,LOC105614778,TXN2,LOC105609952,ORMDL2,DNM1L,LOC101107947,SARNP,M…
3	175587001	175588200	134354373	194127767	Milk fat percentage QTL (57739)	LOC101117240,LOC105614917,NTN4,TRNAK-UUU,RFX4,LOC105611569,LOC101115112,PRPH,LOC105614148,LOC106990328,ABCC9,LOC101117744,R3HDM2,KMT2D,LOC105605372,GNS,ERGIC2,DNAJC22,LOC105614765,PA2G4,BICD1,FAR2,ERBB3,LOC105613670,LOC105613279,LOC101106928,CCDC91,LOC101103465,MTERF2,LOC101104739,LOC101106764,SPRYD4,ARHGEF25,NEMP1,CCT2,LOC105614919,LOC105614778,TXN2,LOC105609952,ORMDL2,DNM1L,LOC101107947,SARNP,M…
3	175915001	175916500	134354373	194127767	Milk fat percentage QTL (57739)	LOC101117240,LOC105614917,NTN4,TRNAK-UUU,RFX4,LOC105611569,LOC101115112,PRPH,LOC105614148,LOC106990328,ABCC9,LOC101117744,R3HDM2,KMT2D,LOC105605372,GNS,ERGIC2,DNAJC22,LOC105614765,PA2G4,BICD1,FAR2,ERBB3,LOC105613670,LOC105613279,LOC101106928,CCDC91,LOC101103465,MTERF2,LOC101104739,LOC101106764,SPRYD4,ARHGEF25,NEMP1,CCT2,LOC105614919,LOC105614778,TXN2,LOC105609952,ORMDL2,DNM1L,LOC101107947,SARNP,M…
3	177438201	177439200	134354373	194127767	Milk fat percentage QTL (57739)	LOC101117240,LOC105614917,NTN4,TRNAK-UUU,RFX4,LOC105611569,LOC101115112,PRPH,LOC105614148,LOC106990328,ABCC9,LOC101117744,R3HDM2,KMT2D,LOC105605372,GNS,ERGIC2,DNAJC22,LOC105614765,PA2G4,BICD1,FAR2,ERBB3,LOC105613670,LOC105613279,LOC101106928,CCDC91,LOC101103465,MTERF2,LOC101104739,LOC101106764,SPRYD4,ARHGEF25,NEMP1,CCT2,LOC105614919,LOC105614778,TXN2,LOC105609952,ORMDL2,DNM1L,LOC101107947,SARNP,M…
3	177523301	177524600	134354373	194127767	Milk fat percentage QTL (57739)	LOC101117240,LOC105614917,NTN4,TRNAK-UUU,RFX4,LOC105611569,LOC101115112,PRPH,LOC105614148,LOC106990328,ABCC9,LOC101117744,R3HDM2,KMT2D,LOC105605372,GNS,ERGIC2,DNAJC22,LOC105614765,PA2G4,BICD1,FAR2,ERBB3,LOC105613670,LOC105613279,LOC101106928,CCDC91,LOC101103465,MTERF2,LOC101104739,LOC101106764,SPRYD4,ARHGEF25,NEMP1,CCT2,LOC105614919,LOC105614778,TXN2,LOC105609952,ORMDL2,DNM1L,LOC101107947,SARNP,M…
3	177577301	177578300	134354373	194127767	Milk fat percentage QTL (57739)	LOC101117240,LOC105614917,NTN4,TRNAK-UUU,RFX4,LOC105611569,LOC101115112,PRPH,LOC105614148,LOC106990328,ABCC9,LOC101117744,R3HDM2,KMT2D,LOC105605372,GNS,ERGIC2,DNAJC22,LOC105614765,PA2G4,BICD1,FAR2,ERBB3,LOC105613670,LOC105613279,LOC101106928,CCDC91,LOC101103465,MTERF2,LOC101104739,LOC101106764,SPRYD4,ARHGEF25,NEMP1,CCT2,LOC105614919,LOC105614778,TXN2,LOC105609952,ORMDL2,DNM1L,LOC101107947,SARNP,M…
3	177630201	177631300	134354373	194127767	Milk fat percentage QTL (57739)	LOC101117240,LOC105614917,NTN4,TRNAK-UUU,RFX4,LOC105611569,LOC101115112,PRPH,LOC105614148,LOC106990328,ABCC9,LOC101117744,R3HDM2,KMT2D,LOC105605372,GNS,ERGIC2,DNAJC22,LOC105614765,PA2G4,BICD1,FAR2,ERBB3,LOC105613670,LOC105613279,LOC101106928,CCDC91,LOC101103465,MTERF2,LOC101104739,LOC101106764,SPRYD4,ARHGEF25,NEMP1,CCT2,LOC105614919,LOC105614778,TXN2,LOC105609952,ORMDL2,DNM1L,LOC101107947,SARNP,M…
3	178156101	178157200	134354373	194127767	Milk fat percentage QTL (57739)	LOC101117240,LOC105614917,NTN4,TRNAK-UUU,RFX4,LOC105611569,LOC101115112,PRPH,LOC105614148,LOC106990328,ABCC9,LOC101117744,R3HDM2,KMT2D,LOC105605372,GNS,ERGIC2,DNAJC22,LOC105614765,PA2G4,BICD1,FAR2,ERBB3,LOC105613670,LOC105613279,LOC101106928,CCDC91,LOC101103465,MTERF2,LOC101104739,LOC101106764,SPRYD4,ARHGEF25,NEMP1,CCT2,LOC105614919,LOC105614778,TXN2,LOC105609952,ORMDL2,DNM1L,LOC101107947,SARNP,M…
3	178305301	178306400	134354373	194127767	Milk fat percentage QTL (57739)	LOC101117240,LOC105614917,NTN4,TRNAK-UUU,RFX4,LOC105611569,LOC101115112,PRPH,LOC105614148,LOC106990328,ABCC9,LOC101117744,R3HDM2,KMT2D,LOC105605372,GNS,ERGIC2,DNAJC22,LOC105614765,PA2G4,BICD1,FAR2,ERBB3,LOC105613670,LOC105613279,LOC101106928,CCDC91,LOC101103465,MTERF2,LOC101104739,LOC101106764,SPRYD4,ARHGEF25,NEMP1,CCT2,LOC105614919,LOC105614778,TXN2,LOC105609952,ORMDL2,DNM1L,LOC101107947,SARNP,M…
3	178431301	178432600	134354373	194127767	Milk fat percentage QTL (57739)	LOC101117240,LOC105614917,NTN4,TRNAK-UUU,RFX4,LOC105611569,LOC101115112,PRPH,LOC105614148,LOC106990328,ABCC9,LOC101117744,R3HDM2,KMT2D,LOC105605372,GNS,ERGIC2,DNAJC22,LOC105614765,PA2G4,BICD1,FAR2,ERBB3,LOC105613670,LOC105613279,LOC101106928,CCDC91,LOC101103465,MTERF2,LOC101104739,LOC101106764,SPRYD4,ARHGEF25,NEMP1,CCT2,LOC105614919,LOC105614778,TXN2,LOC105609952,ORMDL2,DNM1L,LOC101107947,SARNP,M…
3	179024901	179026000	134354373	194127767	Milk fat percentage QTL (57739)	LOC101117240,LOC105614917,NTN4,TRNAK-UUU,RFX4,LOC105611569,LOC101115112,PRPH,LOC105614148,LOC106990328,ABCC9,LOC101117744,R3HDM2,KMT2D,LOC105605372,GNS,ERGIC2,DNAJC22,LOC105614765,PA2G4,BICD1,FAR2,ERBB3,LOC105613670,LOC105613279,LOC101106928,CCDC91,LOC101103465,MTERF2,LOC101104739,LOC101106764,SPRYD4,ARHGEF25,NEMP1,CCT2,LOC105614919,LOC105614778,TXN2,LOC105609952,ORMDL2,DNM1L,LOC101107947,SARNP,M…
3	179080601	179085400	134354373	194127767	Milk fat percentage QTL (57739)	LOC101117240,LOC105614917,NTN4,TRNAK-UUU,RFX4,LOC105611569,LOC101115112,PRPH,LOC105614148,LOC106990328,ABCC9,LOC101117744,R3HDM2,KMT2D,LOC105605372,GNS,ERGIC2,DNAJC22,LOC105614765,PA2G4,BICD1,FAR2,ERBB3,LOC105613670,LOC105613279,LOC101106928,CCDC91,LOC101103465,MTERF2,LOC101104739,LOC101106764,SPRYD4,ARHGEF25,NEMP1,CCT2,LOC105614919,LOC105614778,TXN2,LOC105609952,ORMDL2,DNM1L,LOC101107947,SARNP,M…
3	179085401	179088600	134354373	194127767	Milk fat percentage QTL (57739)	LOC101117240,LOC105614917,NTN4,TRNAK-UUU,RFX4,LOC105611569,LOC101115112,PRPH,LOC105614148,LOC106990328,ABCC9,LOC101117744,R3HDM2,KMT2D,LOC105605372,GNS,ERGIC2,DNAJC22,LOC105614765,PA2G4,BICD1,FAR2,ERBB3,LOC105613670,LOC105613279,LOC101106928,CCDC91,LOC101103465,MTERF2,LOC101104739,LOC101106764,SPRYD4,ARHGEF25,NEMP1,CCT2,LOC105614919,LOC105614778,TXN2,LOC105609952,ORMDL2,DNM1L,LOC101107947,SARNP,M…
3	179091501	179104100	134354373	194127767	Milk fat percentage QTL (57739)	LOC101117240,LOC105614917,NTN4,TRNAK-UUU,RFX4,LOC105611569,LOC101115112,PRPH,LOC105614148,LOC106990328,ABCC9,LOC101117744,R3HDM2,KMT2D,LOC105605372,GNS,ERGIC2,DNAJC22,LOC105614765,PA2G4,BICD1,FAR2,ERBB3,LOC105613670,LOC105613279,LOC101106928,CCDC91,LOC101103465,MTERF2,LOC101104739,LOC101106764,SPRYD4,ARHGEF25,NEMP1,CCT2,LOC105614919,LOC105614778,TXN2,LOC105609952,ORMDL2,DNM1L,LOC101107947,SARNP,M…
3	179129201	179134000	134354373	194127767	Milk fat percentage QTL (57739)	LOC101117240,LOC105614917,NTN4,TRNAK-UUU,RFX4,LOC105611569,LOC101115112,PRPH,LOC105614148,LOC106990328,ABCC9,LOC101117744,R3HDM2,KMT2D,LOC105605372,GNS,ERGIC2,DNAJC22,LOC105614765,PA2G4,BICD1,FAR2,ERBB3,LOC105613670,LOC105613279,LOC101106928,CCDC91,LOC101103465,MTERF2,LOC101104739,LOC101106764,SPRYD4,ARHGEF25,NEMP1,CCT2,LOC105614919,LOC105614778,TXN2,LOC105609952,ORMDL2,DNM1L,LOC101107947,SARNP,M…
3	179149801	179155100	134354373	194127767	Milk fat percentage QTL (57739)	LOC101117240,LOC105614917,NTN4,TRNAK-UUU,RFX4,LOC105611569,LOC101115112,PRPH,LOC105614148,LOC106990328,ABCC9,LOC101117744,R3HDM2,KMT2D,LOC105605372,GNS,ERGIC2,DNAJC22,LOC105614765,PA2G4,BICD1,FAR2,ERBB3,LOC105613670,LOC105613279,LOC101106928,CCDC91,LOC101103465,MTERF2,LOC101104739,LOC101106764,SPRYD4,ARHGEF25,NEMP1,CCT2,LOC105614919,LOC105614778,TXN2,LOC105609952,ORMDL2,DNM1L,LOC101107947,SARNP,M…
3	179165501	179173200	134354373	194127767	Milk fat percentage QTL (57739)	LOC101117240,LOC105614917,NTN4,TRNAK-UUU,RFX4,LOC105611569,LOC101115112,PRPH,LOC105614148,LOC106990328,ABCC9,LOC101117744,R3HDM2,KMT2D,LOC105605372,GNS,ERGIC2,DNAJC22,LOC105614765,PA2G4,BICD1,FAR2,ERBB3,LOC105613670,LOC105613279,LOC101106928,CCDC91,LOC101103465,MTERF2,LOC101104739,LOC101106764,SPRYD4,ARHGEF25,NEMP1,CCT2,LOC105614919,LOC105614778,TXN2,LOC105609952,ORMDL2,DNM1L,LOC101107947,SARNP,M…
3	179219201	179222600	134354373	194127767	Milk fat percentage QTL (57739)	LOC101117240,LOC105614917,NTN4,TRNAK-UUU,RFX4,LOC105611569,LOC101115112,PRPH,LOC105614148,LOC106990328,ABCC9,LOC101117744,R3HDM2,KMT2D,LOC105605372,GNS,ERGIC2,DNAJC22,LOC105614765,PA2G4,BICD1,FAR2,ERBB3,LOC105613670,LOC105613279,LOC101106928,CCDC91,LOC101103465,MTERF2,LOC101104739,LOC101106764,SPRYD4,ARHGEF25,NEMP1,CCT2,LOC105614919,LOC105614778,TXN2,LOC105609952,ORMDL2,DNM1L,LOC101107947,SARNP,M…
3	179222601	179228500	134354373	194127767	Milk fat percentage QTL (57739)	LOC101117240,LOC105614917,NTN4,TRNAK-UUU,RFX4,LOC105611569,LOC101115112,PRPH,LOC105614148,LOC106990328,ABCC9,LOC101117744,R3HDM2,KMT2D,LOC105605372,GNS,ERGIC2,DNAJC22,LOC105614765,PA2G4,BICD1,FAR2,ERBB3,LOC105613670,LOC105613279,LOC101106928,CCDC91,LOC101103465,MTERF2,LOC101104739,LOC101106764,SPRYD4,ARHGEF25,NEMP1,CCT2,LOC105614919,LOC105614778,TXN2,LOC105609952,ORMDL2,DNM1L,LOC101107947,SARNP,M…
3	179228501	179229900	134354373	194127767	Milk fat percentage QTL (57739)	LOC101117240,LOC105614917,NTN4,TRNAK-UUU,RFX4,LOC105611569,LOC101115112,PRPH,LOC105614148,LOC106990328,ABCC9,LOC101117744,R3HDM2,KMT2D,LOC105605372,GNS,ERGIC2,DNAJC22,LOC105614765,PA2G4,BICD1,FAR2,ERBB3,LOC105613670,LOC105613279,LOC101106928,CCDC91,LOC101103465,MTERF2,LOC101104739,LOC101106764,SPRYD4,ARHGEF25,NEMP1,CCT2,LOC105614919,LOC105614778,TXN2,LOC105609952,ORMDL2,DNM1L,LOC101107947,SARNP,M…
3	179229901	179245300	134354373	194127767	Milk fat percentage QTL (57739)	LOC101117240,LOC105614917,NTN4,TRNAK-UUU,RFX4,LOC105611569,LOC101115112,PRPH,LOC105614148,LOC106990328,ABCC9,LOC101117744,R3HDM2,KMT2D,LOC105605372,GNS,ERGIC2,DNAJC22,LOC105614765,PA2G4,BICD1,FAR2,ERBB3,LOC105613670,LOC105613279,LOC101106928,CCDC91,LOC101103465,MTERF2,LOC101104739,LOC101106764,SPRYD4,ARHGEF25,NEMP1,CCT2,LOC105614919,LOC105614778,TXN2,LOC105609952,ORMDL2,DNM1L,LOC101107947,SARNP,M…
3	179277401	179278500	134354373	194127767	Milk fat percentage QTL (57739)	LOC101117240,LOC105614917,NTN4,TRNAK-UUU,RFX4,LOC105611569,LOC101115112,PRPH,LOC105614148,LOC106990328,ABCC9,LOC101117744,R3HDM2,KMT2D,LOC105605372,GNS,ERGIC2,DNAJC22,LOC105614765,PA2G4,BICD1,FAR2,ERBB3,LOC105613670,LOC105613279,LOC101106928,CCDC91,LOC101103465,MTERF2,LOC101104739,LOC101106764,SPRYD4,ARHGEF25,NEMP1,CCT2,LOC105614919,LOC105614778,TXN2,LOC105609952,ORMDL2,DNM1L,LOC101107947,SARNP,M…
3	179287101	179292800	134354373	194127767	Milk fat percentage QTL (57739)	LOC101117240,LOC105614917,NTN4,TRNAK-UUU,RFX4,LOC105611569,LOC101115112,PRPH,LOC105614148,LOC106990328,ABCC9,LOC101117744,R3HDM2,KMT2D,LOC105605372,GNS,ERGIC2,DNAJC22,LOC105614765,PA2G4,BICD1,FAR2,ERBB3,LOC105613670,LOC105613279,LOC101106928,CCDC91,LOC101103465,MTERF2,LOC101104739,LOC101106764,SPRYD4,ARHGEF25,NEMP1,CCT2,LOC105614919,LOC105614778,TXN2,LOC105609952,ORMDL2,DNM1L,LOC101107947,SARNP,M…
3	179293601	179295000	134354373	194127767	Milk fat percentage QTL (57739)	LOC101117240,LOC105614917,NTN4,TRNAK-UUU,RFX4,LOC105611569,LOC101115112,PRPH,LOC105614148,LOC106990328,ABCC9,LOC101117744,R3HDM2,KMT2D,LOC105605372,GNS,ERGIC2,DNAJC22,LOC105614765,PA2G4,BICD1,FAR2,ERBB3,LOC105613670,LOC105613279,LOC101106928,CCDC91,LOC101103465,MTERF2,LOC101104739,LOC101106764,SPRYD4,ARHGEF25,NEMP1,CCT2,LOC105614919,LOC105614778,TXN2,LOC105609952,ORMDL2,DNM1L,LOC101107947,SARNP,M…
3	179295201	179308500	134354373	194127767	Milk fat percentage QTL (57739)	LOC101117240,LOC105614917,NTN4,TRNAK-UUU,RFX4,LOC105611569,LOC101115112,PRPH,LOC105614148,LOC106990328,ABCC9,LOC101117744,R3HDM2,KMT2D,LOC105605372,GNS,ERGIC2,DNAJC22,LOC105614765,PA2G4,BICD1,FAR2,ERBB3,LOC105613670,LOC105613279,LOC101106928,CCDC91,LOC101103465,MTERF2,LOC101104739,LOC101106764,SPRYD4,ARHGEF25,NEMP1,CCT2,LOC105614919,LOC105614778,TXN2,LOC105609952,ORMDL2,DNM1L,LOC101107947,SARNP,M…
3	180708501	180710500	134354373	194127767	Milk fat percentage QTL (57739)	LOC101117240,LOC105614917,NTN4,TRNAK-UUU,RFX4,LOC105611569,LOC101115112,PRPH,LOC105614148,LOC106990328,ABCC9,LOC101117744,R3HDM2,KMT2D,LOC105605372,GNS,ERGIC2,DNAJC22,LOC105614765,PA2G4,BICD1,FAR2,ERBB3,LOC105613670,LOC105613279,LOC101106928,CCDC91,LOC101103465,MTERF2,LOC101104739,LOC101106764,SPRYD4,ARHGEF25,NEMP1,CCT2,LOC105614919,LOC105614778,TXN2,LOC105609952,ORMDL2,DNM1L,LOC101107947,SARNP,M…
3	180774101	180776800	134354373	194127767	Milk fat percentage QTL (57739)	LOC101117240,LOC105614917,NTN4,TRNAK-UUU,RFX4,LOC105611569,LOC101115112,PRPH,LOC105614148,LOC106990328,ABCC9,LOC101117744,R3HDM2,KMT2D,LOC105605372,GNS,ERGIC2,DNAJC22,LOC105614765,PA2G4,BICD1,FAR2,ERBB3,LOC105613670,LOC105613279,LOC101106928,CCDC91,LOC101103465,MTERF2,LOC101104739,LOC101106764,SPRYD4,ARHGEF25,NEMP1,CCT2,LOC105614919,LOC105614778,TXN2,LOC105609952,ORMDL2,DNM1L,LOC101107947,SARNP,M…
3	180949101	180950100	134354373	194127767	Milk fat percentage QTL (57739)	LOC101117240,LOC105614917,NTN4,TRNAK-UUU,RFX4,LOC105611569,LOC101115112,PRPH,LOC105614148,LOC106990328,ABCC9,LOC101117744,R3HDM2,KMT2D,LOC105605372,GNS,ERGIC2,DNAJC22,LOC105614765,PA2G4,BICD1,FAR2,ERBB3,LOC105613670,LOC105613279,LOC101106928,CCDC91,LOC101103465,MTERF2,LOC101104739,LOC101106764,SPRYD4,ARHGEF25,NEMP1,CCT2,LOC105614919,LOC105614778,TXN2,LOC105609952,ORMDL2,DNM1L,LOC101107947,SARNP,M…
3	181045101	181048000	134354373	194127767	Milk fat percentage QTL (57739)	LOC101117240,LOC105614917,NTN4,TRNAK-UUU,RFX4,LOC105611569,LOC101115112,PRPH,LOC105614148,LOC106990328,ABCC9,LOC101117744,R3HDM2,KMT2D,LOC105605372,GNS,ERGIC2,DNAJC22,LOC105614765,PA2G4,BICD1,FAR2,ERBB3,LOC105613670,LOC105613279,LOC101106928,CCDC91,LOC101103465,MTERF2,LOC101104739,LOC101106764,SPRYD4,ARHGEF25,NEMP1,CCT2,LOC105614919,LOC105614778,TXN2,LOC105609952,ORMDL2,DNM1L,LOC101107947,SARNP,M…
3	181337101	181338600	134354373	194127767	Milk fat percentage QTL (57739)	LOC101117240,LOC105614917,NTN4,TRNAK-UUU,RFX4,LOC105611569,LOC101115112,PRPH,LOC105614148,LOC106990328,ABCC9,LOC101117744,R3HDM2,KMT2D,LOC105605372,GNS,ERGIC2,DNAJC22,LOC105614765,PA2G4,BICD1,FAR2,ERBB3,LOC105613670,LOC105613279,LOC101106928,CCDC91,LOC101103465,MTERF2,LOC101104739,LOC101106764,SPRYD4,ARHGEF25,NEMP1,CCT2,LOC105614919,LOC105614778,TXN2,LOC105609952,ORMDL2,DNM1L,LOC101107947,SARNP,M…
3	182149201	182152900	134354373	194127767	Milk fat percentage QTL (57739)	LOC101117240,LOC105614917,NTN4,TRNAK-UUU,RFX4,LOC105611569,LOC101115112,PRPH,LOC105614148,LOC106990328,ABCC9,LOC101117744,R3HDM2,KMT2D,LOC105605372,GNS,ERGIC2,DNAJC22,LOC105614765,PA2G4,BICD1,FAR2,ERBB3,LOC105613670,LOC105613279,LOC101106928,CCDC91,LOC101103465,MTERF2,LOC101104739,LOC101106764,SPRYD4,ARHGEF25,NEMP1,CCT2,LOC105614919,LOC105614778,TXN2,LOC105609952,ORMDL2,DNM1L,LOC101107947,SARNP,M…
3	182158701	182160000	134354373	194127767	Milk fat percentage QTL (57739)	LOC101117240,LOC105614917,NTN4,TRNAK-UUU,RFX4,LOC105611569,LOC101115112,PRPH,LOC105614148,LOC106990328,ABCC9,LOC101117744,R3HDM2,KMT2D,LOC105605372,GNS,ERGIC2,DNAJC22,LOC105614765,PA2G4,BICD1,FAR2,ERBB3,LOC105613670,LOC105613279,LOC101106928,CCDC91,LOC101103465,MTERF2,LOC101104739,LOC101106764,SPRYD4,ARHGEF25,NEMP1,CCT2,LOC105614919,LOC105614778,TXN2,LOC105609952,ORMDL2,DNM1L,LOC101107947,SARNP,M…
3	182317501	182322800	134354373	194127767	Milk fat percentage QTL (57739)	LOC101117240,LOC105614917,NTN4,TRNAK-UUU,RFX4,LOC105611569,LOC101115112,PRPH,LOC105614148,LOC106990328,ABCC9,LOC101117744,R3HDM2,KMT2D,LOC105605372,GNS,ERGIC2,DNAJC22,LOC105614765,PA2G4,BICD1,FAR2,ERBB3,LOC105613670,LOC105613279,LOC101106928,CCDC91,LOC101103465,MTERF2,LOC101104739,LOC101106764,SPRYD4,ARHGEF25,NEMP1,CCT2,LOC105614919,LOC105614778,TXN2,LOC105609952,ORMDL2,DNM1L,LOC101107947,SARNP,M…
3	182438901	182439900	134354373	194127767	Milk fat percentage QTL (57739)	LOC101117240,LOC105614917,NTN4,TRNAK-UUU,RFX4,LOC105611569,LOC101115112,PRPH,LOC105614148,LOC106990328,ABCC9,LOC101117744,R3HDM2,KMT2D,LOC105605372,GNS,ERGIC2,DNAJC22,LOC105614765,PA2G4,BICD1,FAR2,ERBB3,LOC105613670,LOC105613279,LOC101106928,CCDC91,LOC101103465,MTERF2,LOC101104739,LOC101106764,SPRYD4,ARHGEF25,NEMP1,CCT2,LOC105614919,LOC105614778,TXN2,LOC105609952,ORMDL2,DNM1L,LOC101107947,SARNP,M…
3	182508201	182509200	134354373	194127767	Milk fat percentage QTL (57739)	LOC101117240,LOC105614917,NTN4,TRNAK-UUU,RFX4,LOC105611569,LOC101115112,PRPH,LOC105614148,LOC106990328,ABCC9,LOC101117744,R3HDM2,KMT2D,LOC105605372,GNS,ERGIC2,DNAJC22,LOC105614765,PA2G4,BICD1,FAR2,ERBB3,LOC105613670,LOC105613279,LOC101106928,CCDC91,LOC101103465,MTERF2,LOC101104739,LOC101106764,SPRYD4,ARHGEF25,NEMP1,CCT2,LOC105614919,LOC105614778,TXN2,LOC105609952,ORMDL2,DNM1L,LOC101107947,SARNP,M…
3	182873801	182875000	134354373	194127767	Milk fat percentage QTL (57739)	LOC101117240,LOC105614917,NTN4,TRNAK-UUU,RFX4,LOC105611569,LOC101115112,PRPH,LOC105614148,LOC106990328,ABCC9,LOC101117744,R3HDM2,KMT2D,LOC105605372,GNS,ERGIC2,DNAJC22,LOC105614765,PA2G4,BICD1,FAR2,ERBB3,LOC105613670,LOC105613279,LOC101106928,CCDC91,LOC101103465,MTERF2,LOC101104739,LOC101106764,SPRYD4,ARHGEF25,NEMP1,CCT2,LOC105614919,LOC105614778,TXN2,LOC105609952,ORMDL2,DNM1L,LOC101107947,SARNP,M…
3	183533201	183534300	134354373	194127767	Milk fat percentage QTL (57739)	LOC101117240,LOC105614917,NTN4,TRNAK-UUU,RFX4,LOC105611569,LOC101115112,PRPH,LOC105614148,LOC106990328,ABCC9,LOC101117744,R3HDM2,KMT2D,LOC105605372,GNS,ERGIC2,DNAJC22,LOC105614765,PA2G4,BICD1,FAR2,ERBB3,LOC105613670,LOC105613279,LOC101106928,CCDC91,LOC101103465,MTERF2,LOC101104739,LOC101106764,SPRYD4,ARHGEF25,NEMP1,CCT2,LOC105614919,LOC105614778,TXN2,LOC105609952,ORMDL2,DNM1L,LOC101107947,SARNP,M…
3	183785601	183786800	134354373	194127767	Milk fat percentage QTL (57739)	LOC101117240,LOC105614917,NTN4,TRNAK-UUU,RFX4,LOC105611569,LOC101115112,PRPH,LOC105614148,LOC106990328,ABCC9,LOC101117744,R3HDM2,KMT2D,LOC105605372,GNS,ERGIC2,DNAJC22,LOC105614765,PA2G4,BICD1,FAR2,ERBB3,LOC105613670,LOC105613279,LOC101106928,CCDC91,LOC101103465,MTERF2,LOC101104739,LOC101106764,SPRYD4,ARHGEF25,NEMP1,CCT2,LOC105614919,LOC105614778,TXN2,LOC105609952,ORMDL2,DNM1L,LOC101107947,SARNP,M…
3	183849501	183853500	134354373	194127767	Milk fat percentage QTL (57739)	LOC101117240,LOC105614917,NTN4,TRNAK-UUU,RFX4,LOC105611569,LOC101115112,PRPH,LOC105614148,LOC106990328,ABCC9,LOC101117744,R3HDM2,KMT2D,LOC105605372,GNS,ERGIC2,DNAJC22,LOC105614765,PA2G4,BICD1,FAR2,ERBB3,LOC105613670,LOC105613279,LOC101106928,CCDC91,LOC101103465,MTERF2,LOC101104739,LOC101106764,SPRYD4,ARHGEF25,NEMP1,CCT2,LOC105614919,LOC105614778,TXN2,LOC105609952,ORMDL2,DNM1L,LOC101107947,SARNP,M…
3	184278401	184279600	134354373	194127767	Milk fat percentage QTL (57739)	LOC101117240,LOC105614917,NTN4,TRNAK-UUU,RFX4,LOC105611569,LOC101115112,PRPH,LOC105614148,LOC106990328,ABCC9,LOC101117744,R3HDM2,KMT2D,LOC105605372,GNS,ERGIC2,DNAJC22,LOC105614765,PA2G4,BICD1,FAR2,ERBB3,LOC105613670,LOC105613279,LOC101106928,CCDC91,LOC101103465,MTERF2,LOC101104739,LOC101106764,SPRYD4,ARHGEF25,NEMP1,CCT2,LOC105614919,LOC105614778,TXN2,LOC105609952,ORMDL2,DNM1L,LOC101107947,SARNP,M…
3	184549601	184551300	134354373	194127767	Milk fat percentage QTL (57739)	LOC101117240,LOC105614917,NTN4,TRNAK-UUU,RFX4,LOC105611569,LOC101115112,PRPH,LOC105614148,LOC106990328,ABCC9,LOC101117744,R3HDM2,KMT2D,LOC105605372,GNS,ERGIC2,DNAJC22,LOC105614765,PA2G4,BICD1,FAR2,ERBB3,LOC105613670,LOC105613279,LOC101106928,CCDC91,LOC101103465,MTERF2,LOC101104739,LOC101106764,SPRYD4,ARHGEF25,NEMP1,CCT2,LOC105614919,LOC105614778,TXN2,LOC105609952,ORMDL2,DNM1L,LOC101107947,SARNP,M…
3	185053001	185054300	134354373	194127767	Milk fat percentage QTL (57739)	LOC101117240,LOC105614917,NTN4,TRNAK-UUU,RFX4,LOC105611569,LOC101115112,PRPH,LOC105614148,LOC106990328,ABCC9,LOC101117744,R3HDM2,KMT2D,LOC105605372,GNS,ERGIC2,DNAJC22,LOC105614765,PA2G4,BICD1,FAR2,ERBB3,LOC105613670,LOC105613279,LOC101106928,CCDC91,LOC101103465,MTERF2,LOC101104739,LOC101106764,SPRYD4,ARHGEF25,NEMP1,CCT2,LOC105614919,LOC105614778,TXN2,LOC105609952,ORMDL2,DNM1L,LOC101107947,SARNP,M…
3	185248401	185249400	134354373	194127767	Milk fat percentage QTL (57739)	LOC101117240,LOC105614917,NTN4,TRNAK-UUU,RFX4,LOC105611569,LOC101115112,PRPH,LOC105614148,LOC106990328,ABCC9,LOC101117744,R3HDM2,KMT2D,LOC105605372,GNS,ERGIC2,DNAJC22,LOC105614765,PA2G4,BICD1,FAR2,ERBB3,LOC105613670,LOC105613279,LOC101106928,CCDC91,LOC101103465,MTERF2,LOC101104739,LOC101106764,SPRYD4,ARHGEF25,NEMP1,CCT2,LOC105614919,LOC105614778,TXN2,LOC105609952,ORMDL2,DNM1L,LOC101107947,SARNP,M…
3	185389801	185390800	134354373	194127767	Milk fat percentage QTL (57739)	LOC101117240,LOC105614917,NTN4,TRNAK-UUU,RFX4,LOC105611569,LOC101115112,PRPH,LOC105614148,LOC106990328,ABCC9,LOC101117744,R3HDM2,KMT2D,LOC105605372,GNS,ERGIC2,DNAJC22,LOC105614765,PA2G4,BICD1,FAR2,ERBB3,LOC105613670,LOC105613279,LOC101106928,CCDC91,LOC101103465,MTERF2,LOC101104739,LOC101106764,SPRYD4,ARHGEF25,NEMP1,CCT2,LOC105614919,LOC105614778,TXN2,LOC105609952,ORMDL2,DNM1L,LOC101107947,SARNP,M…
3	185421701	185425100	134354373	194127767	Milk fat percentage QTL (57739)	LOC101117240,LOC105614917,NTN4,TRNAK-UUU,RFX4,LOC105611569,LOC101115112,PRPH,LOC105614148,LOC106990328,ABCC9,LOC101117744,R3HDM2,KMT2D,LOC105605372,GNS,ERGIC2,DNAJC22,LOC105614765,PA2G4,BICD1,FAR2,ERBB3,LOC105613670,LOC105613279,LOC101106928,CCDC91,LOC101103465,MTERF2,LOC101104739,LOC101106764,SPRYD4,ARHGEF25,NEMP1,CCT2,LOC105614919,LOC105614778,TXN2,LOC105609952,ORMDL2,DNM1L,LOC101107947,SARNP,M…
3	185463301	185464800	134354373	194127767	Milk fat percentage QTL (57739)	LOC101117240,LOC105614917,NTN4,TRNAK-UUU,RFX4,LOC105611569,LOC101115112,PRPH,LOC105614148,LOC106990328,ABCC9,LOC101117744,R3HDM2,KMT2D,LOC105605372,GNS,ERGIC2,DNAJC22,LOC105614765,PA2G4,BICD1,FAR2,ERBB3,LOC105613670,LOC105613279,LOC101106928,CCDC91,LOC101103465,MTERF2,LOC101104739,LOC101106764,SPRYD4,ARHGEF25,NEMP1,CCT2,LOC105614919,LOC105614778,TXN2,LOC105609952,ORMDL2,DNM1L,LOC101107947,SARNP,M…
3	185491901	185492900	134354373	194127767	Milk fat percentage QTL (57739)	LOC101117240,LOC105614917,NTN4,TRNAK-UUU,RFX4,LOC105611569,LOC101115112,PRPH,LOC105614148,LOC106990328,ABCC9,LOC101117744,R3HDM2,KMT2D,LOC105605372,GNS,ERGIC2,DNAJC22,LOC105614765,PA2G4,BICD1,FAR2,ERBB3,LOC105613670,LOC105613279,LOC101106928,CCDC91,LOC101103465,MTERF2,LOC101104739,LOC101106764,SPRYD4,ARHGEF25,NEMP1,CCT2,LOC105614919,LOC105614778,TXN2,LOC105609952,ORMDL2,DNM1L,LOC101107947,SARNP,M…
3	186060101	186063300	134354373	194127767	Milk fat percentage QTL (57739)	LOC101117240,LOC105614917,NTN4,TRNAK-UUU,RFX4,LOC105611569,LOC101115112,PRPH,LOC105614148,LOC106990328,ABCC9,LOC101117744,R3HDM2,KMT2D,LOC105605372,GNS,ERGIC2,DNAJC22,LOC105614765,PA2G4,BICD1,FAR2,ERBB3,LOC105613670,LOC105613279,LOC101106928,CCDC91,LOC101103465,MTERF2,LOC101104739,LOC101106764,SPRYD4,ARHGEF25,NEMP1,CCT2,LOC105614919,LOC105614778,TXN2,LOC105609952,ORMDL2,DNM1L,LOC101107947,SARNP,M…
3	187963001	187964700	134354373	194127767	Milk fat percentage QTL (57739)	LOC101117240,LOC105614917,NTN4,TRNAK-UUU,RFX4,LOC105611569,LOC101115112,PRPH,LOC105614148,LOC106990328,ABCC9,LOC101117744,R3HDM2,KMT2D,LOC105605372,GNS,ERGIC2,DNAJC22,LOC105614765,PA2G4,BICD1,FAR2,ERBB3,LOC105613670,LOC105613279,LOC101106928,CCDC91,LOC101103465,MTERF2,LOC101104739,LOC101106764,SPRYD4,ARHGEF25,NEMP1,CCT2,LOC105614919,LOC105614778,TXN2,LOC105609952,ORMDL2,DNM1L,LOC101107947,SARNP,M…
3	188245401	188246800	134354373	194127767	Milk fat percentage QTL (57739)	LOC101117240,LOC105614917,NTN4,TRNAK-UUU,RFX4,LOC105611569,LOC101115112,PRPH,LOC105614148,LOC106990328,ABCC9,LOC101117744,R3HDM2,KMT2D,LOC105605372,GNS,ERGIC2,DNAJC22,LOC105614765,PA2G4,BICD1,FAR2,ERBB3,LOC105613670,LOC105613279,LOC101106928,CCDC91,LOC101103465,MTERF2,LOC101104739,LOC101106764,SPRYD4,ARHGEF25,NEMP1,CCT2,LOC105614919,LOC105614778,TXN2,LOC105609952,ORMDL2,DNM1L,LOC101107947,SARNP,M…
3	188864201	188865700	134354373	194127767	Milk fat percentage QTL (57739)	LOC101117240,LOC105614917,NTN4,TRNAK-UUU,RFX4,LOC105611569,LOC101115112,PRPH,LOC105614148,LOC106990328,ABCC9,LOC101117744,R3HDM2,KMT2D,LOC105605372,GNS,ERGIC2,DNAJC22,LOC105614765,PA2G4,BICD1,FAR2,ERBB3,LOC105613670,LOC105613279,LOC101106928,CCDC91,LOC101103465,MTERF2,LOC101104739,LOC101106764,SPRYD4,ARHGEF25,NEMP1,CCT2,LOC105614919,LOC105614778,TXN2,LOC105609952,ORMDL2,DNM1L,LOC101107947,SARNP,M…
3	189124101	189125300	134354373	194127767	Milk fat percentage QTL (57739)	LOC101117240,LOC105614917,NTN4,TRNAK-UUU,RFX4,LOC105611569,LOC101115112,PRPH,LOC105614148,LOC106990328,ABCC9,LOC101117744,R3HDM2,KMT2D,LOC105605372,GNS,ERGIC2,DNAJC22,LOC105614765,PA2G4,BICD1,FAR2,ERBB3,LOC105613670,LOC105613279,LOC101106928,CCDC91,LOC101103465,MTERF2,LOC101104739,LOC101106764,SPRYD4,ARHGEF25,NEMP1,CCT2,LOC105614919,LOC105614778,TXN2,LOC105609952,ORMDL2,DNM1L,LOC101107947,SARNP,M…
3	189174301	189177200	134354373	194127767	Milk fat percentage QTL (57739)	LOC101117240,LOC105614917,NTN4,TRNAK-UUU,RFX4,LOC105611569,LOC101115112,PRPH,LOC105614148,LOC106990328,ABCC9,LOC101117744,R3HDM2,KMT2D,LOC105605372,GNS,ERGIC2,DNAJC22,LOC105614765,PA2G4,BICD1,FAR2,ERBB3,LOC105613670,LOC105613279,LOC101106928,CCDC91,LOC101103465,MTERF2,LOC101104739,LOC101106764,SPRYD4,ARHGEF25,NEMP1,CCT2,LOC105614919,LOC105614778,TXN2,LOC105609952,ORMDL2,DNM1L,LOC101107947,SARNP,M…
3	189258001	189259100	134354373	194127767	Milk fat percentage QTL (57739)	LOC101117240,LOC105614917,NTN4,TRNAK-UUU,RFX4,LOC105611569,LOC101115112,PRPH,LOC105614148,LOC106990328,ABCC9,LOC101117744,R3HDM2,KMT2D,LOC105605372,GNS,ERGIC2,DNAJC22,LOC105614765,PA2G4,BICD1,FAR2,ERBB3,LOC105613670,LOC105613279,LOC101106928,CCDC91,LOC101103465,MTERF2,LOC101104739,LOC101106764,SPRYD4,ARHGEF25,NEMP1,CCT2,LOC105614919,LOC105614778,TXN2,LOC105609952,ORMDL2,DNM1L,LOC101107947,SARNP,M…
3	190266201	190267400	134354373	194127767	Milk fat percentage QTL (57739)	LOC101117240,LOC105614917,NTN4,TRNAK-UUU,RFX4,LOC105611569,LOC101115112,PRPH,LOC105614148,LOC106990328,ABCC9,LOC101117744,R3HDM2,KMT2D,LOC105605372,GNS,ERGIC2,DNAJC22,LOC105614765,PA2G4,BICD1,FAR2,ERBB3,LOC105613670,LOC105613279,LOC101106928,CCDC91,LOC101103465,MTERF2,LOC101104739,LOC101106764,SPRYD4,ARHGEF25,NEMP1,CCT2,LOC105614919,LOC105614778,TXN2,LOC105609952,ORMDL2,DNM1L,LOC101107947,SARNP,M…
3	191231401	191233700	134354373	194127767	Milk fat percentage QTL (57739)	LOC101117240,LOC105614917,NTN4,TRNAK-UUU,RFX4,LOC105611569,LOC101115112,PRPH,LOC105614148,LOC106990328,ABCC9,LOC101117744,R3HDM2,KMT2D,LOC105605372,GNS,ERGIC2,DNAJC22,LOC105614765,PA2G4,BICD1,FAR2,ERBB3,LOC105613670,LOC105613279,LOC101106928,CCDC91,LOC101103465,MTERF2,LOC101104739,LOC101106764,SPRYD4,ARHGEF25,NEMP1,CCT2,LOC105614919,LOC105614778,TXN2,LOC105609952,ORMDL2,DNM1L,LOC101107947,SARNP,M…
3	191792201	191793200	134354373	194127767	Milk fat percentage QTL (57739)	LOC101117240,LOC105614917,NTN4,TRNAK-UUU,RFX4,LOC105611569,LOC101115112,PRPH,LOC105614148,LOC106990328,ABCC9,LOC101117744,R3HDM2,KMT2D,LOC105605372,GNS,ERGIC2,DNAJC22,LOC105614765,PA2G4,BICD1,FAR2,ERBB3,LOC105613670,LOC105613279,LOC101106928,CCDC91,LOC101103465,MTERF2,LOC101104739,LOC101106764,SPRYD4,ARHGEF25,NEMP1,CCT2,LOC105614919,LOC105614778,TXN2,LOC105609952,ORMDL2,DNM1L,LOC101107947,SARNP,M…
3	192008101	192009200	134354373	194127767	Milk fat percentage QTL (57739)	LOC101117240,LOC105614917,NTN4,TRNAK-UUU,RFX4,LOC105611569,LOC101115112,PRPH,LOC105614148,LOC106990328,ABCC9,LOC101117744,R3HDM2,KMT2D,LOC105605372,GNS,ERGIC2,DNAJC22,LOC105614765,PA2G4,BICD1,FAR2,ERBB3,LOC105613670,LOC105613279,LOC101106928,CCDC91,LOC101103465,MTERF2,LOC101104739,LOC101106764,SPRYD4,ARHGEF25,NEMP1,CCT2,LOC105614919,LOC105614778,TXN2,LOC105609952,ORMDL2,DNM1L,LOC101107947,SARNP,M…
3	192429401	192430400	134354373	194127767	Milk fat percentage QTL (57739)	LOC101117240,LOC105614917,NTN4,TRNAK-UUU,RFX4,LOC105611569,LOC101115112,PRPH,LOC105614148,LOC106990328,ABCC9,LOC101117744,R3HDM2,KMT2D,LOC105605372,GNS,ERGIC2,DNAJC22,LOC105614765,PA2G4,BICD1,FAR2,ERBB3,LOC105613670,LOC105613279,LOC101106928,CCDC91,LOC101103465,MTERF2,LOC101104739,LOC101106764,SPRYD4,ARHGEF25,NEMP1,CCT2,LOC105614919,LOC105614778,TXN2,LOC105609952,ORMDL2,DNM1L,LOC101107947,SARNP,M…
3	192560801	192561800	134354373	194127767	Milk fat percentage QTL (57739)	LOC101117240,LOC105614917,NTN4,TRNAK-UUU,RFX4,LOC105611569,LOC101115112,PRPH,LOC105614148,LOC106990328,ABCC9,LOC101117744,R3HDM2,KMT2D,LOC105605372,GNS,ERGIC2,DNAJC22,LOC105614765,PA2G4,BICD1,FAR2,ERBB3,LOC105613670,LOC105613279,LOC101106928,CCDC91,LOC101103465,MTERF2,LOC101104739,LOC101106764,SPRYD4,ARHGEF25,NEMP1,CCT2,LOC105614919,LOC105614778,TXN2,LOC105609952,ORMDL2,DNM1L,LOC101107947,SARNP,M…
3	192615201	192616800	134354373	194127767	Milk fat percentage QTL (57739)	LOC101117240,LOC105614917,NTN4,TRNAK-UUU,RFX4,LOC105611569,LOC101115112,PRPH,LOC105614148,LOC106990328,ABCC9,LOC101117744,R3HDM2,KMT2D,LOC105605372,GNS,ERGIC2,DNAJC22,LOC105614765,PA2G4,BICD1,FAR2,ERBB3,LOC105613670,LOC105613279,LOC101106928,CCDC91,LOC101103465,MTERF2,LOC101104739,LOC101106764,SPRYD4,ARHGEF25,NEMP1,CCT2,LOC105614919,LOC105614778,TXN2,LOC105609952,ORMDL2,DNM1L,LOC101107947,SARNP,M…
3	192896001	192897800	134354373	194127767	Milk fat percentage QTL (57739)	LOC101117240,LOC105614917,NTN4,TRNAK-UUU,RFX4,LOC105611569,LOC101115112,PRPH,LOC105614148,LOC106990328,ABCC9,LOC101117744,R3HDM2,KMT2D,LOC105605372,GNS,ERGIC2,DNAJC22,LOC105614765,PA2G4,BICD1,FAR2,ERBB3,LOC105613670,LOC105613279,LOC101106928,CCDC91,LOC101103465,MTERF2,LOC101104739,LOC101106764,SPRYD4,ARHGEF25,NEMP1,CCT2,LOC105614919,LOC105614778,TXN2,LOC105609952,ORMDL2,DNM1L,LOC101107947,SARNP,M…
3	193040101	193044200	134354373	194127767	Milk fat percentage QTL (57739)	LOC101117240,LOC105614917,NTN4,TRNAK-UUU,RFX4,LOC105611569,LOC101115112,PRPH,LOC105614148,LOC106990328,ABCC9,LOC101117744,R3HDM2,KMT2D,LOC105605372,GNS,ERGIC2,DNAJC22,LOC105614765,PA2G4,BICD1,FAR2,ERBB3,LOC105613670,LOC105613279,LOC101106928,CCDC91,LOC101103465,MTERF2,LOC101104739,LOC101106764,SPRYD4,ARHGEF25,NEMP1,CCT2,LOC105614919,LOC105614778,TXN2,LOC105609952,ORMDL2,DNM1L,LOC101107947,SARNP,M…
3	193546101	193556700	134354373	194127767	Milk fat percentage QTL (57739)	LOC101117240,LOC105614917,NTN4,TRNAK-UUU,RFX4,LOC105611569,LOC101115112,PRPH,LOC105614148,LOC106990328,ABCC9,LOC101117744,R3HDM2,KMT2D,LOC105605372,GNS,ERGIC2,DNAJC22,LOC105614765,PA2G4,BICD1,FAR2,ERBB3,LOC105613670,LOC105613279,LOC101106928,CCDC91,LOC101103465,MTERF2,LOC101104739,LOC101106764,SPRYD4,ARHGEF25,NEMP1,CCT2,LOC105614919,LOC105614778,TXN2,LOC105609952,ORMDL2,DNM1L,LOC101107947,SARNP,M…
3	193636101	193637100	134354373	194127767	Milk fat percentage QTL (57739)	LOC101117240,LOC105614917,NTN4,TRNAK-UUU,RFX4,LOC105611569,LOC101115112,PRPH,LOC105614148,LOC106990328,ABCC9,LOC101117744,R3HDM2,KMT2D,LOC105605372,GNS,ERGIC2,DNAJC22,LOC105614765,PA2G4,BICD1,FAR2,ERBB3,LOC105613670,LOC105613279,LOC101106928,CCDC91,LOC101103465,MTERF2,LOC101104739,LOC101106764,SPRYD4,ARHGEF25,NEMP1,CCT2,LOC105614919,LOC105614778,TXN2,LOC105609952,ORMDL2,DNM1L,LOC101107947,SARNP,M…
3	193675901	193678700	134354373	194127767	Milk fat percentage QTL (57739)	LOC101117240,LOC105614917,NTN4,TRNAK-UUU,RFX4,LOC105611569,LOC101115112,PRPH,LOC105614148,LOC106990328,ABCC9,LOC101117744,R3HDM2,KMT2D,LOC105605372,GNS,ERGIC2,DNAJC22,LOC105614765,PA2G4,BICD1,FAR2,ERBB3,LOC105613670,LOC105613279,LOC101106928,CCDC91,LOC101103465,MTERF2,LOC101104739,LOC101106764,SPRYD4,ARHGEF25,NEMP1,CCT2,LOC105614919,LOC105614778,TXN2,LOC105609952,ORMDL2,DNM1L,LOC101107947,SARNP,M…
3	194026401	194027400	134354373	194127767	Milk fat percentage QTL (57739)	LOC101117240,LOC105614917,NTN4,TRNAK-UUU,RFX4,LOC105611569,LOC101115112,PRPH,LOC105614148,LOC106990328,ABCC9,LOC101117744,R3HDM2,KMT2D,LOC105605372,GNS,ERGIC2,DNAJC22,LOC105614765,PA2G4,BICD1,FAR2,ERBB3,LOC105613670,LOC105613279,LOC101106928,CCDC91,LOC101103465,MTERF2,LOC101104739,LOC101106764,SPRYD4,ARHGEF25,NEMP1,CCT2,LOC105614919,LOC105614778,TXN2,LOC105609952,ORMDL2,DNM1L,LOC101107947,SARNP,M…
3	194122101	194126700	134354373	194127767	Milk fat percentage QTL (57739)	LOC101117240,LOC105614917,NTN4,TRNAK-UUU,RFX4,LOC105611569,LOC101115112,PRPH,LOC105614148,LOC106990328,ABCC9,LOC101117744,R3HDM2,KMT2D,LOC105605372,GNS,ERGIC2,DNAJC22,LOC105614765,PA2G4,BICD1,FAR2,ERBB3,LOC105613670,LOC105613279,LOC101106928,CCDC91,LOC101103465,MTERF2,LOC101104739,LOC101106764,SPRYD4,ARHGEF25,NEMP1,CCT2,LOC105614919,LOC105614778,TXN2,LOC105609952,ORMDL2,DNM1L,LOC101107947,SARNP,M…
4	45066701	45068200	44972115	45375647	Fecal egg count QTL (125781)	ORC5,RELN,LOC105614998
4	45089401	45090600	44972115	45375647	Fecal egg count QTL (125781)	ORC5,RELN,LOC105614998
4	45274801	45276700	44972115	45375647	Fecal egg count QTL (125781)	ORC5,RELN,LOC105614998
4	45345501	45346500	44972115	45375647	Fecal egg count QTL (125781)	ORC5,RELN,LOC105614998
4	48681401	48682600	48402666	48932308	Tail fat deposition QTL (127001)	DUS4L,COG5,LOC105611148,CBLL1,GPR22,BCAP29,DLD,SLC26A4,SLC26A3,LOC106991126
4	54190801	54192300	54010906	57978582	Immunoglobulin A level QTL (95611)	LSMEM1,GPR85,IFRD1,LOC106990713,LOC101110584,TRNAG-CCC,LOC105610466,LOC105615015,LOC105611834,TRNAW-CCA,LOC101111091,LOC105610465,PPP1R3A,IMMP2L,LOC105611832,LOC101108567,LRRN3,LOC101110835,DOCK4,C4H7orf60,ZNF277,TMEM168,FOXP2
4	54450801	54451800	54010906	57978582	Immunoglobulin A level QTL (95611)	LSMEM1,GPR85,IFRD1,LOC106990713,LOC101110584,TRNAG-CCC,LOC105610466,LOC105615015,LOC105611834,TRNAW-CCA,LOC101111091,LOC105610465,PPP1R3A,IMMP2L,LOC105611832,LOC101108567,LRRN3,LOC101110835,DOCK4,C4H7orf60,ZNF277,TMEM168,FOXP2
4	54481701	54483200	54010906	57978582	Immunoglobulin A level QTL (95611)	LSMEM1,GPR85,IFRD1,LOC106990713,LOC101110584,TRNAG-CCC,LOC105610466,LOC105615015,LOC105611834,TRNAW-CCA,LOC101111091,LOC105610465,PPP1R3A,IMMP2L,LOC105611832,LOC101108567,LRRN3,LOC101110835,DOCK4,C4H7orf60,ZNF277,TMEM168,FOXP2
4	54715501	54716900	54010906	57978582	Immunoglobulin A level QTL (95611)	LSMEM1,GPR85,IFRD1,LOC106990713,LOC101110584,TRNAG-CCC,LOC105610466,LOC105615015,LOC105611834,TRNAW-CCA,LOC101111091,LOC105610465,PPP1R3A,IMMP2L,LOC105611832,LOC101108567,LRRN3,LOC101110835,DOCK4,C4H7orf60,ZNF277,TMEM168,FOXP2
4	54811101	54812500	54010906	57978582	Immunoglobulin A level QTL (95611)	LSMEM1,GPR85,IFRD1,LOC106990713,LOC101110584,TRNAG-CCC,LOC105610466,LOC105615015,LOC105611834,TRNAW-CCA,LOC101111091,LOC105610465,PPP1R3A,IMMP2L,LOC105611832,LOC101108567,LRRN3,LOC101110835,DOCK4,C4H7orf60,ZNF277,TMEM168,FOXP2
4	55131101	55133500	54010906	57978582	Immunoglobulin A level QTL (95611)	LSMEM1,GPR85,IFRD1,LOC106990713,LOC101110584,TRNAG-CCC,LOC105610466,LOC105615015,LOC105611834,TRNAW-CCA,LOC101111091,LOC105610465,PPP1R3A,IMMP2L,LOC105611832,LOC101108567,LRRN3,LOC101110835,DOCK4,C4H7orf60,ZNF277,TMEM168,FOXP2
4	55221301	55222500	54010906	57978582	Immunoglobulin A level QTL (95611)	LSMEM1,GPR85,IFRD1,LOC106990713,LOC101110584,TRNAG-CCC,LOC105610466,LOC105615015,LOC105611834,TRNAW-CCA,LOC101111091,LOC105610465,PPP1R3A,IMMP2L,LOC105611832,LOC101108567,LRRN3,LOC101110835,DOCK4,C4H7orf60,ZNF277,TMEM168,FOXP2
4	55282601	55288600	54010906	57978582	Immunoglobulin A level QTL (95611)	LSMEM1,GPR85,IFRD1,LOC106990713,LOC101110584,TRNAG-CCC,LOC105610466,LOC105615015,LOC105611834,TRNAW-CCA,LOC101111091,LOC105610465,PPP1R3A,IMMP2L,LOC105611832,LOC101108567,LRRN3,LOC101110835,DOCK4,C4H7orf60,ZNF277,TMEM168,FOXP2
4	55410301	55411300	54010906	57978582	Immunoglobulin A level QTL (95611)	LSMEM1,GPR85,IFRD1,LOC106990713,LOC101110584,TRNAG-CCC,LOC105610466,LOC105615015,LOC105611834,TRNAW-CCA,LOC101111091,LOC105610465,PPP1R3A,IMMP2L,LOC105611832,LOC101108567,LRRN3,LOC101110835,DOCK4,C4H7orf60,ZNF277,TMEM168,FOXP2
4	55547501	55550100	54010906	57978582	Immunoglobulin A level QTL (95611)	LSMEM1,GPR85,IFRD1,LOC106990713,LOC101110584,TRNAG-CCC,LOC105610466,LOC105615015,LOC105611834,TRNAW-CCA,LOC101111091,LOC105610465,PPP1R3A,IMMP2L,LOC105611832,LOC101108567,LRRN3,LOC101110835,DOCK4,C4H7orf60,ZNF277,TMEM168,FOXP2
4	55833901	55835100	54010906	57978582	Immunoglobulin A level QTL (95611)	LSMEM1,GPR85,IFRD1,LOC106990713,LOC101110584,TRNAG-CCC,LOC105610466,LOC105615015,LOC105611834,TRNAW-CCA,LOC101111091,LOC105610465,PPP1R3A,IMMP2L,LOC105611832,LOC101108567,LRRN3,LOC101110835,DOCK4,C4H7orf60,ZNF277,TMEM168,FOXP2
4	57065401	57066500	54010906	57978582	Immunoglobulin A level QTL (95611)	LSMEM1,GPR85,IFRD1,LOC106990713,LOC101110584,TRNAG-CCC,LOC105610466,LOC105615015,LOC105611834,TRNAW-CCA,LOC101111091,LOC105610465,PPP1R3A,IMMP2L,LOC105611832,LOC101108567,LRRN3,LOC101110835,DOCK4,C4H7orf60,ZNF277,TMEM168,FOXP2
4	57129201	57130600	54010906	57978582	Immunoglobulin A level QTL (95611)	LSMEM1,GPR85,IFRD1,LOC106990713,LOC101110584,TRNAG-CCC,LOC105610466,LOC105615015,LOC105611834,TRNAW-CCA,LOC101111091,LOC105610465,PPP1R3A,IMMP2L,LOC105611832,LOC101108567,LRRN3,LOC101110835,DOCK4,C4H7orf60,ZNF277,TMEM168,FOXP2
4	57394601	57395800	54010906	57978582	Immunoglobulin A level QTL (95611)	LSMEM1,GPR85,IFRD1,LOC106990713,LOC101110584,TRNAG-CCC,LOC105610466,LOC105615015,LOC105611834,TRNAW-CCA,LOC101111091,LOC105610465,PPP1R3A,IMMP2L,LOC105611832,LOC101108567,LRRN3,LOC101110835,DOCK4,C4H7orf60,ZNF277,TMEM168,FOXP2
4	57415601	57417400	54010906	57978582	Immunoglobulin A level QTL (95611)	LSMEM1,GPR85,IFRD1,LOC106990713,LOC101110584,TRNAG-CCC,LOC105610466,LOC105615015,LOC105611834,TRNAW-CCA,LOC101111091,LOC105610465,PPP1R3A,IMMP2L,LOC105611832,LOC101108567,LRRN3,LOC101110835,DOCK4,C4H7orf60,ZNF277,TMEM168,FOXP2
4	66965901	66968700	66815494	70297107	Tail fat deposition QTL (126988)	HNRNPA2B1,LOC105606599,LOC101104741,EVX1,LOC105606601,CHN2,SKAP2,TRNAS-GGA,LOC105606593,SNX10,HOXA10,LOC106991102,LOC106991132,TRIL,LOC101115788,TAX1BP1,CPVL,CREB5,HOXA2,NFE2L3,LOC101104988,HOXA4,MIR148A,CBX3,HOXA9,HOXA1,TRNAW-CCA,LOC105615045,JAZF1,LOC106991133,HOXA13,HOXA3,HIBADH,HOXA5,LOC105606592,LOC101107436,HOXA11
4	67939501	67940900	66815494	70297107	Tail fat deposition QTL (126988)	HNRNPA2B1,LOC105606599,LOC101104741,EVX1,LOC105606601,CHN2,SKAP2,TRNAS-GGA,LOC105606593,SNX10,HOXA10,LOC106991102,LOC106991132,TRIL,LOC101115788,TAX1BP1,CPVL,CREB5,HOXA2,NFE2L3,LOC101104988,HOXA4,MIR148A,CBX3,HOXA9,HOXA1,TRNAW-CCA,LOC105615045,JAZF1,LOC106991133,HOXA13,HOXA3,HIBADH,HOXA5,LOC105606592,LOC101107436,HOXA11
4	68191601	68192800	66815494	70297107	Tail fat deposition QTL (126988)	HNRNPA2B1,LOC105606599,LOC101104741,EVX1,LOC105606601,CHN2,SKAP2,TRNAS-GGA,LOC105606593,SNX10,HOXA10,LOC106991102,LOC106991132,TRIL,LOC101115788,TAX1BP1,CPVL,CREB5,HOXA2,NFE2L3,LOC101104988,HOXA4,MIR148A,CBX3,HOXA9,HOXA1,TRNAW-CCA,LOC105615045,JAZF1,LOC106991133,HOXA13,HOXA3,HIBADH,HOXA5,LOC105606592,LOC101107436,HOXA11
4	70066901	70069700	66815494	70297107	Tail fat deposition QTL (126988)	HNRNPA2B1,LOC105606599,LOC101104741,EVX1,LOC105606601,CHN2,SKAP2,TRNAS-GGA,LOC105606593,SNX10,HOXA10,LOC106991102,LOC106991132,TRIL,LOC101115788,TAX1BP1,CPVL,CREB5,HOXA2,NFE2L3,LOC101104988,HOXA4,MIR148A,CBX3,HOXA9,HOXA1,TRNAW-CCA,LOC105615045,JAZF1,LOC106991133,HOXA13,HOXA3,HIBADH,HOXA5,LOC105606592,LOC101107436,HOXA11
4	74342601	74343700	74326323	76487633	Milk fat percentage QTL (57721)	LOC105615056,LOC101117070,HUS1,STEAP2,IGFBP1,TNS3,GTPBP10,TRNAK-CUU,IGFBP3,ADCY1,CFAP69,STEAP1
4	74385701	74387600	74326323	76487633	Milk fat percentage QTL (57721)	LOC105615056,LOC101117070,HUS1,STEAP2,IGFBP1,TNS3,GTPBP10,TRNAK-CUU,IGFBP3,ADCY1,CFAP69,STEAP1
4	74401601	74403000	74326323	76487633	Milk fat percentage QTL (57721)	LOC105615056,LOC101117070,HUS1,STEAP2,IGFBP1,TNS3,GTPBP10,TRNAK-CUU,IGFBP3,ADCY1,CFAP69,STEAP1
4	74860401	74861500	74326323	76487633	Milk fat percentage QTL (57721)	LOC105615056,LOC101117070,HUS1,STEAP2,IGFBP1,TNS3,GTPBP10,TRNAK-CUU,IGFBP3,ADCY1,CFAP69,STEAP1
4	81483001	81484400	81297196	81503569	Abomasom pH QTL (126073)	POU6F2,YAE1D1
4	83318801	83320200	83197613	83662710	Fecal egg count QTL (125783)	LOC106990577,LOC106990578
4	83322401	83330300	83197613	83662710	Fecal egg count QTL (125783)	LOC106990577,LOC106990578
4	87611301	87613500	87472382	87695846	Tail fat deposition QTL (127003)	SLC13A1
4	87626101	87627300	87472382	87695846	Tail fat deposition QTL (127003)	SLC13A1
5	75347101	75348500	74380266	75927368	Milk protein percentage QTL (57722)	LOC101117162
5	75662601	75663700	74380266	75927368	Milk protein percentage QTL (57722)	LOC101117162
5	75672201	75673400	74380266	75927368	Milk protein percentage QTL (57722)	LOC101117162
5	84350001	84351600	84325532	84704031	Haemonchus contortus FEC QTL (126074)	LOC101105328,LOC101119475
5	84437101	84441500	84325532	84704031	Haemonchus contortus FEC QTL (126074)	LOC101105328,LOC101119475
5	84574801	84576000	84325532	84704031	Haemonchus contortus FEC QTL (126074)	LOC101105328,LOC101119475
5	88915901	88924000	88799685	93468871	Milk protein yield QTL (57723)	LOC101122786,LOC105607629,SLF1,ELL2,LOC101121262,LOC106991204,LOC106991152,MCTP1,PCSK1,SPATA9,LOC105607625,LOC105615327,RFESD,FAM81B,TRNAC-ACA,CAST,FAM172A,LOC105607632,TRNAW-CCA,LOC101102236,TTC37,LOC106991153,ARSK,LOC101107597,KIAA0825,GPR150,GLRX,ERAP1,TRNAC-GCA,RHOBTB3,NR2F1,TRNAR-CCU,LOC105607634
5	89582101	89583500	88799685	93468871	Milk protein yield QTL (57723)	LOC101122786,LOC105607629,SLF1,ELL2,LOC101121262,LOC106991204,LOC106991152,MCTP1,PCSK1,SPATA9,LOC105607625,LOC105615327,RFESD,FAM81B,TRNAC-ACA,CAST,FAM172A,LOC105607632,TRNAW-CCA,LOC101102236,TTC37,LOC106991153,ARSK,LOC101107597,KIAA0825,GPR150,GLRX,ERAP1,TRNAC-GCA,RHOBTB3,NR2F1,TRNAR-CCU,LOC105607634
5	89641701	89647900	88799685	93468871	Milk protein yield QTL (57723)	LOC101122786,LOC105607629,SLF1,ELL2,LOC101121262,LOC106991204,LOC106991152,MCTP1,PCSK1,SPATA9,LOC105607625,LOC105615327,RFESD,FAM81B,TRNAC-ACA,CAST,FAM172A,LOC105607632,TRNAW-CCA,LOC101102236,TTC37,LOC106991153,ARSK,LOC101107597,KIAA0825,GPR150,GLRX,ERAP1,TRNAC-GCA,RHOBTB3,NR2F1,TRNAR-CCU,LOC105607634
5	90685701	90687300	88799685	93468871	Milk protein yield QTL (57723)	LOC101122786,LOC105607629,SLF1,ELL2,LOC101121262,LOC106991204,LOC106991152,MCTP1,PCSK1,SPATA9,LOC105607625,LOC105615327,RFESD,FAM81B,TRNAC-ACA,CAST,FAM172A,LOC105607632,TRNAW-CCA,LOC101102236,TTC37,LOC106991153,ARSK,LOC101107597,KIAA0825,GPR150,GLRX,ERAP1,TRNAC-GCA,RHOBTB3,NR2F1,TRNAR-CCU,LOC105607634
5	91200301	91201300	88799685	93468871	Milk protein yield QTL (57723)	LOC101122786,LOC105607629,SLF1,ELL2,LOC101121262,LOC106991204,LOC106991152,MCTP1,PCSK1,SPATA9,LOC105607625,LOC105615327,RFESD,FAM81B,TRNAC-ACA,CAST,FAM172A,LOC105607632,TRNAW-CCA,LOC101102236,TTC37,LOC106991153,ARSK,LOC101107597,KIAA0825,GPR150,GLRX,ERAP1,TRNAC-GCA,RHOBTB3,NR2F1,TRNAR-CCU,LOC105607634
5	91895101	91896200	88799685	93468871	Milk protein yield QTL (57723)	LOC101122786,LOC105607629,SLF1,ELL2,LOC101121262,LOC106991204,LOC106991152,MCTP1,PCSK1,SPATA9,LOC105607625,LOC105615327,RFESD,FAM81B,TRNAC-ACA,CAST,FAM172A,LOC105607632,TRNAW-CCA,LOC101102236,TTC37,LOC106991153,ARSK,LOC101107597,KIAA0825,GPR150,GLRX,ERAP1,TRNAC-GCA,RHOBTB3,NR2F1,TRNAR-CCU,LOC105607634
5	92547701	92548700	88799685	93468871	Milk protein yield QTL (57723)	LOC101122786,LOC105607629,SLF1,ELL2,LOC101121262,LOC106991204,LOC106991152,MCTP1,PCSK1,SPATA9,LOC105607625,LOC105615327,RFESD,FAM81B,TRNAC-ACA,CAST,FAM172A,LOC105607632,TRNAW-CCA,LOC101102236,TTC37,LOC106991153,ARSK,LOC101107597,KIAA0825,GPR150,GLRX,ERAP1,TRNAC-GCA,RHOBTB3,NR2F1,TRNAR-CCU,LOC105607634
5	92768201	92769200	88799685	93468871	Milk protein yield QTL (57723)	LOC101122786,LOC105607629,SLF1,ELL2,LOC101121262,LOC106991204,LOC106991152,MCTP1,PCSK1,SPATA9,LOC105607625,LOC105615327,RFESD,FAM81B,TRNAC-ACA,CAST,FAM172A,LOC105607632,TRNAW-CCA,LOC101102236,TTC37,LOC106991153,ARSK,LOC101107597,KIAA0825,GPR150,GLRX,ERAP1,TRNAC-GCA,RHOBTB3,NR2F1,TRNAR-CCU,LOC105607634
5	92786901	92788100	88799685	93468871	Milk protein yield QTL (57723)	LOC101122786,LOC105607629,SLF1,ELL2,LOC101121262,LOC106991204,LOC106991152,MCTP1,PCSK1,SPATA9,LOC105607625,LOC105615327,RFESD,FAM81B,TRNAC-ACA,CAST,FAM172A,LOC105607632,TRNAW-CCA,LOC101102236,TTC37,LOC106991153,ARSK,LOC101107597,KIAA0825,GPR150,GLRX,ERAP1,TRNAC-GCA,RHOBTB3,NR2F1,TRNAR-CCU,LOC105607634
5	92814301	92816100	88799685	93468871	Milk protein yield QTL (57723)	LOC101122786,LOC105607629,SLF1,ELL2,LOC101121262,LOC106991204,LOC106991152,MCTP1,PCSK1,SPATA9,LOC105607625,LOC105615327,RFESD,FAM81B,TRNAC-ACA,CAST,FAM172A,LOC105607632,TRNAW-CCA,LOC101102236,TTC37,LOC106991153,ARSK,LOC101107597,KIAA0825,GPR150,GLRX,ERAP1,TRNAC-GCA,RHOBTB3,NR2F1,TRNAR-CCU,LOC105607634
5	93129301	93130400	88799685	93468871	Milk protein yield QTL (57723)	LOC101122786,LOC105607629,SLF1,ELL2,LOC101121262,LOC106991204,LOC106991152,MCTP1,PCSK1,SPATA9,LOC105607625,LOC105615327,RFESD,FAM81B,TRNAC-ACA,CAST,FAM172A,LOC105607632,TRNAW-CCA,LOC101102236,TTC37,LOC106991153,ARSK,LOC101107597,KIAA0825,GPR150,GLRX,ERAP1,TRNAC-GCA,RHOBTB3,NR2F1,TRNAR-CCU,LOC105607634
5	93278401	93279400	88799685	93468871	Milk protein yield QTL (57723)	LOC101122786,LOC105607629,SLF1,ELL2,LOC101121262,LOC106991204,LOC106991152,MCTP1,PCSK1,SPATA9,LOC105607625,LOC105615327,RFESD,FAM81B,TRNAC-ACA,CAST,FAM172A,LOC105607632,TRNAW-CCA,LOC101102236,TTC37,LOC106991153,ARSK,LOC101107597,KIAA0825,GPR150,GLRX,ERAP1,TRNAC-GCA,RHOBTB3,NR2F1,TRNAR-CCU,LOC105607634
5	93401901	93403500	88799685	93468871	Milk protein yield QTL (57723)	LOC101122786,LOC105607629,SLF1,ELL2,LOC101121262,LOC106991204,LOC106991152,MCTP1,PCSK1,SPATA9,LOC105607625,LOC105615327,RFESD,FAM81B,TRNAC-ACA,CAST,FAM172A,LOC105607632,TRNAW-CCA,LOC101102236,TTC37,LOC106991153,ARSK,LOC101107597,KIAA0825,GPR150,GLRX,ERAP1,TRNAC-GCA,RHOBTB3,NR2F1,TRNAR-CCU,LOC105607634
5	95409401	95410400	95140848	95612551	Fecal egg count QTL (125785)	CHD1,LOC105611815,RGMB
5	95435501	95440700	95140848	95612551	Fecal egg count QTL (125785)	CHD1,LOC105611815,RGMB
6	12781901	12783000	12513340	17537924	Bone area QTL (95801)	LOC105613852,OSTC,ANK2,ENPEP,LRIT3,LARP7,TIFA,LOC105609763,LOC105610296,LOC105609765,LOC101120834,LOC106991229,LOC105610295,SEC24B,LOC105610284,COL25A1,SGMS2,LOC105615410,LOC105610290,LOC106991230,NEUROG2,HADH,CCDC109B,ALPK1,LEF1,LOC105615402,TRNAW-CCA,PLA2G12A,ZGRF1,CASP6,LOC105615411,LOC101120329,GAR1,PITX2,LOC105615407,AP1AR,C6H4orf32,LOC101120332,RRH,ELOVL6,RPL34,LOC105609762,CFI,ETNPPL,EGF,L…
6	13347001	13348100	12513340	17537924	Bone area QTL (95801)	LOC105613852,OSTC,ANK2,ENPEP,LRIT3,LARP7,TIFA,LOC105609763,LOC105610296,LOC105609765,LOC101120834,LOC106991229,LOC105610295,SEC24B,LOC105610284,COL25A1,SGMS2,LOC105615410,LOC105610290,LOC106991230,NEUROG2,HADH,CCDC109B,ALPK1,LEF1,LOC105615402,TRNAW-CCA,PLA2G12A,ZGRF1,CASP6,LOC105615411,LOC101120329,GAR1,PITX2,LOC105615407,AP1AR,C6H4orf32,LOC101120332,RRH,ELOVL6,RPL34,LOC105609762,CFI,ETNPPL,EGF,L…
6	14192901	14194000	12513340	17537924	Bone area QTL (95801)	LOC105613852,OSTC,ANK2,ENPEP,LRIT3,LARP7,TIFA,LOC105609763,LOC105610296,LOC105609765,LOC101120834,LOC106991229,LOC105610295,SEC24B,LOC105610284,COL25A1,SGMS2,LOC105615410,LOC105610290,LOC106991230,NEUROG2,HADH,CCDC109B,ALPK1,LEF1,LOC105615402,TRNAW-CCA,PLA2G12A,ZGRF1,CASP6,LOC105615411,LOC101120329,GAR1,PITX2,LOC105615407,AP1AR,C6H4orf32,LOC101120332,RRH,ELOVL6,RPL34,LOC105609762,CFI,ETNPPL,EGF,L…
6	14624801	14626000	12513340	17537924	Bone area QTL (95801)	LOC105613852,OSTC,ANK2,ENPEP,LRIT3,LARP7,TIFA,LOC105609763,LOC105610296,LOC105609765,LOC101120834,LOC106991229,LOC105610295,SEC24B,LOC105610284,COL25A1,SGMS2,LOC105615410,LOC105610290,LOC106991230,NEUROG2,HADH,CCDC109B,ALPK1,LEF1,LOC105615402,TRNAW-CCA,PLA2G12A,ZGRF1,CASP6,LOC105615411,LOC101120329,GAR1,PITX2,LOC105615407,AP1AR,C6H4orf32,LOC101120332,RRH,ELOVL6,RPL34,LOC105609762,CFI,ETNPPL,EGF,L…
6	14944301	14947000	12513340	17537924	Bone area QTL (95801)	LOC105613852,OSTC,ANK2,ENPEP,LRIT3,LARP7,TIFA,LOC105609763,LOC105610296,LOC105609765,LOC101120834,LOC106991229,LOC105610295,SEC24B,LOC105610284,COL25A1,SGMS2,LOC105615410,LOC105610290,LOC106991230,NEUROG2,HADH,CCDC109B,ALPK1,LEF1,LOC105615402,TRNAW-CCA,PLA2G12A,ZGRF1,CASP6,LOC105615411,LOC101120329,GAR1,PITX2,LOC105615407,AP1AR,C6H4orf32,LOC101120332,RRH,ELOVL6,RPL34,LOC105609762,CFI,ETNPPL,EGF,L…
6	15104501	15105800	12513340	17537924	Bone area QTL (95801)	LOC105613852,OSTC,ANK2,ENPEP,LRIT3,LARP7,TIFA,LOC105609763,LOC105610296,LOC105609765,LOC101120834,LOC106991229,LOC105610295,SEC24B,LOC105610284,COL25A1,SGMS2,LOC105615410,LOC105610290,LOC106991230,NEUROG2,HADH,CCDC109B,ALPK1,LEF1,LOC105615402,TRNAW-CCA,PLA2G12A,ZGRF1,CASP6,LOC105615411,LOC101120329,GAR1,PITX2,LOC105615407,AP1AR,C6H4orf32,LOC101120332,RRH,ELOVL6,RPL34,LOC105609762,CFI,ETNPPL,EGF,L…
6	15199401	15202100	12513340	17537924	Bone area QTL (95801)	LOC105613852,OSTC,ANK2,ENPEP,LRIT3,LARP7,TIFA,LOC105609763,LOC105610296,LOC105609765,LOC101120834,LOC106991229,LOC105610295,SEC24B,LOC105610284,COL25A1,SGMS2,LOC105615410,LOC105610290,LOC106991230,NEUROG2,HADH,CCDC109B,ALPK1,LEF1,LOC105615402,TRNAW-CCA,PLA2G12A,ZGRF1,CASP6,LOC105615411,LOC101120329,GAR1,PITX2,LOC105615407,AP1AR,C6H4orf32,LOC101120332,RRH,ELOVL6,RPL34,LOC105609762,CFI,ETNPPL,EGF,L…
6	15420101	15421300	12513340	17537924	Bone area QTL (95801)	LOC105613852,OSTC,ANK2,ENPEP,LRIT3,LARP7,TIFA,LOC105609763,LOC105610296,LOC105609765,LOC101120834,LOC106991229,LOC105610295,SEC24B,LOC105610284,COL25A1,SGMS2,LOC105615410,LOC105610290,LOC106991230,NEUROG2,HADH,CCDC109B,ALPK1,LEF1,LOC105615402,TRNAW-CCA,PLA2G12A,ZGRF1,CASP6,LOC105615411,LOC101120329,GAR1,PITX2,LOC105615407,AP1AR,C6H4orf32,LOC101120332,RRH,ELOVL6,RPL34,LOC105609762,CFI,ETNPPL,EGF,L…
6	15567001	15568100	12513340	17537924	Bone area QTL (95801)	LOC105613852,OSTC,ANK2,ENPEP,LRIT3,LARP7,TIFA,LOC105609763,LOC105610296,LOC105609765,LOC101120834,LOC106991229,LOC105610295,SEC24B,LOC105610284,COL25A1,SGMS2,LOC105615410,LOC105610290,LOC106991230,NEUROG2,HADH,CCDC109B,ALPK1,LEF1,LOC105615402,TRNAW-CCA,PLA2G12A,ZGRF1,CASP6,LOC105615411,LOC101120329,GAR1,PITX2,LOC105615407,AP1AR,C6H4orf32,LOC101120332,RRH,ELOVL6,RPL34,LOC105609762,CFI,ETNPPL,EGF,L…
6	15686201	15687600	12513340	17537924	Bone area QTL (95801)	LOC105613852,OSTC,ANK2,ENPEP,LRIT3,LARP7,TIFA,LOC105609763,LOC105610296,LOC105609765,LOC101120834,LOC106991229,LOC105610295,SEC24B,LOC105610284,COL25A1,SGMS2,LOC105615410,LOC105610290,LOC106991230,NEUROG2,HADH,CCDC109B,ALPK1,LEF1,LOC105615402,TRNAW-CCA,PLA2G12A,ZGRF1,CASP6,LOC105615411,LOC101120329,GAR1,PITX2,LOC105615407,AP1AR,C6H4orf32,LOC101120332,RRH,ELOVL6,RPL34,LOC105609762,CFI,ETNPPL,EGF,L…
6	15746501	15747700	12513340	17537924	Bone area QTL (95801)	LOC105613852,OSTC,ANK2,ENPEP,LRIT3,LARP7,TIFA,LOC105609763,LOC105610296,LOC105609765,LOC101120834,LOC106991229,LOC105610295,SEC24B,LOC105610284,COL25A1,SGMS2,LOC105615410,LOC105610290,LOC106991230,NEUROG2,HADH,CCDC109B,ALPK1,LEF1,LOC105615402,TRNAW-CCA,PLA2G12A,ZGRF1,CASP6,LOC105615411,LOC101120329,GAR1,PITX2,LOC105615407,AP1AR,C6H4orf32,LOC101120332,RRH,ELOVL6,RPL34,LOC105609762,CFI,ETNPPL,EGF,L…
6	16076001	16077100	12513340	17537924	Bone area QTL (95801)	LOC105613852,OSTC,ANK2,ENPEP,LRIT3,LARP7,TIFA,LOC105609763,LOC105610296,LOC105609765,LOC101120834,LOC106991229,LOC105610295,SEC24B,LOC105610284,COL25A1,SGMS2,LOC105615410,LOC105610290,LOC106991230,NEUROG2,HADH,CCDC109B,ALPK1,LEF1,LOC105615402,TRNAW-CCA,PLA2G12A,ZGRF1,CASP6,LOC105615411,LOC101120329,GAR1,PITX2,LOC105615407,AP1AR,C6H4orf32,LOC101120332,RRH,ELOVL6,RPL34,LOC105609762,CFI,ETNPPL,EGF,L…
6	16592001	16597600	12513340	17537924	Bone area QTL (95801)	LOC105613852,OSTC,ANK2,ENPEP,LRIT3,LARP7,TIFA,LOC105609763,LOC105610296,LOC105609765,LOC101120834,LOC106991229,LOC105610295,SEC24B,LOC105610284,COL25A1,SGMS2,LOC105615410,LOC105610290,LOC106991230,NEUROG2,HADH,CCDC109B,ALPK1,LEF1,LOC105615402,TRNAW-CCA,PLA2G12A,ZGRF1,CASP6,LOC105615411,LOC101120329,GAR1,PITX2,LOC105615407,AP1AR,C6H4orf32,LOC101120332,RRH,ELOVL6,RPL34,LOC105609762,CFI,ETNPPL,EGF,L…
6	16664601	16666900	12513340	17537924	Bone area QTL (95801)	LOC105613852,OSTC,ANK2,ENPEP,LRIT3,LARP7,TIFA,LOC105609763,LOC105610296,LOC105609765,LOC101120834,LOC106991229,LOC105610295,SEC24B,LOC105610284,COL25A1,SGMS2,LOC105615410,LOC105610290,LOC106991230,NEUROG2,HADH,CCDC109B,ALPK1,LEF1,LOC105615402,TRNAW-CCA,PLA2G12A,ZGRF1,CASP6,LOC105615411,LOC101120329,GAR1,PITX2,LOC105615407,AP1AR,C6H4orf32,LOC101120332,RRH,ELOVL6,RPL34,LOC105609762,CFI,ETNPPL,EGF,L…
6	17967901	17969100	15025644	20052846	Total bone QTL (95781)	LOC105613852,OSTC,TRNAS-GGA,ENPEP,PPA2,LRIT3,AIMP1,NPNT,LOC105609763,LOC105609765,LOC101120834,LOC106991229,LOC105615417,SEC24B,COL25A1,SGMS2,LOC105615410,LOC105611776,LOC106991230,HADH,PAPSS1,CCDC109B,LEF1,PLA2G12A,CASP6,LOC105615411,TET2,LOC101120329,GAR1,LOC105612857,TBCK,GSTCD,INTS12,RRH,LOC106991223,ELOVL6,RPL34,DKK2,LOC105609762,CFI,GIMD1,ARHGEF38,ETNPPL,EGF,LOC105613851
6	18247001	18249200	15025644	20052846	Total bone QTL (95781)	LOC105613852,OSTC,TRNAS-GGA,ENPEP,PPA2,LRIT3,AIMP1,NPNT,LOC105609763,LOC105609765,LOC101120834,LOC106991229,LOC105615417,SEC24B,COL25A1,SGMS2,LOC105615410,LOC105611776,LOC106991230,HADH,PAPSS1,CCDC109B,LEF1,PLA2G12A,CASP6,LOC105615411,TET2,LOC101120329,GAR1,LOC105612857,TBCK,GSTCD,INTS12,RRH,LOC106991223,ELOVL6,RPL34,DKK2,LOC105609762,CFI,GIMD1,ARHGEF38,ETNPPL,EGF,LOC105613851
6	18973501	18975200	15025644	20052846	Total bone QTL (95781)	LOC105613852,OSTC,TRNAS-GGA,ENPEP,PPA2,LRIT3,AIMP1,NPNT,LOC105609763,LOC105609765,LOC101120834,LOC106991229,LOC105615417,SEC24B,COL25A1,SGMS2,LOC105615410,LOC105611776,LOC106991230,HADH,PAPSS1,CCDC109B,LEF1,PLA2G12A,CASP6,LOC105615411,TET2,LOC101120329,GAR1,LOC105612857,TBCK,GSTCD,INTS12,RRH,LOC106991223,ELOVL6,RPL34,DKK2,LOC105609762,CFI,GIMD1,ARHGEF38,ETNPPL,EGF,LOC105613851
6	20519901	20521200	17571414	22241383	Total bone QTL (95782)	LOC105612165,TRNAS-GGA,PPA2,AIMP1,NPNT,LOC101121856,NFKB1,CENPE,LOC105615417,LOC105615568,LOC106991231,LOC105611776,CISD2,CXXC4,SLC9B2,LOC106990504,BDH2,UBE2D3,MANBA,TET2,TACR3,LOC105612857,GSTCD,TBCK,INTS12,LOC106991223,DKK2,GIMD1,ARHGEF38,PAPSS1,SLC9B1
6	20538501	20540000	17571414	22241383	Total bone QTL (95782)	LOC105612165,TRNAS-GGA,PPA2,AIMP1,NPNT,LOC101121856,NFKB1,CENPE,LOC105615417,LOC105615568,LOC106991231,LOC105611776,CISD2,CXXC4,SLC9B2,LOC106990504,BDH2,UBE2D3,MANBA,TET2,TACR3,LOC105612857,GSTCD,TBCK,INTS12,LOC106991223,DKK2,GIMD1,ARHGEF38,PAPSS1,SLC9B1
6	21207101	21208100	17571414	22241383	Total bone QTL (95782)	LOC105612165,TRNAS-GGA,PPA2,AIMP1,NPNT,LOC101121856,NFKB1,CENPE,LOC105615417,LOC105615568,LOC106991231,LOC105611776,CISD2,CXXC4,SLC9B2,LOC106990504,BDH2,UBE2D3,MANBA,TET2,TACR3,LOC105612857,GSTCD,TBCK,INTS12,LOC106991223,DKK2,GIMD1,ARHGEF38,PAPSS1,SLC9B1
6	21894701	21901200	17571414	22241383	Total bone QTL (95782)	LOC105612165,TRNAS-GGA,PPA2,AIMP1,NPNT,LOC101121856,NFKB1,CENPE,LOC105615417,LOC105615568,LOC106991231,LOC105611776,CISD2,CXXC4,SLC9B2,LOC106990504,BDH2,UBE2D3,MANBA,TET2,TACR3,LOC105612857,GSTCD,TBCK,INTS12,LOC106991223,DKK2,GIMD1,ARHGEF38,PAPSS1,SLC9B1
6	22561301	22562700	20080715	24911343	Fat density QTL (95849)	LAMTOR3,LOC105612165,LOC105615429,DNAJB14,SLC39A8,LOC106990491,PPP3CA,LOC101121856,CENPE,LOC105615568,LOC101122110,LOC106991231,LOC105615426,CISD2,DDIT4L,CXXC4,SLC9B2,LOC106990504,BDH2,UBE2D3,LOC105615431,MANBA,TACR3,BANK1,LOC105615432,H2AFZ,LOC105612761,LOC105612972,TRNAC-GCA,DAPP1,LOC105615427,EMCN,NFKB1,SLC9B1
6	22719701	22722900	20080715	24911343	Fat density QTL (95849)	LAMTOR3,LOC105612165,LOC105615429,DNAJB14,SLC39A8,LOC106990491,PPP3CA,LOC101121856,CENPE,LOC105615568,LOC101122110,LOC106991231,LOC105615426,CISD2,DDIT4L,CXXC4,SLC9B2,LOC106990504,BDH2,UBE2D3,LOC105615431,MANBA,TACR3,BANK1,LOC105615432,H2AFZ,LOC105612761,LOC105612972,TRNAC-GCA,DAPP1,LOC105615427,EMCN,NFKB1,SLC9B1
6	23858101	23860000	20080715	24911343	Fat density QTL (95849)	LAMTOR3,LOC105612165,LOC105615429,DNAJB14,SLC39A8,LOC106990491,PPP3CA,LOC101121856,CENPE,LOC105615568,LOC101122110,LOC106991231,LOC105615426,CISD2,DDIT4L,CXXC4,SLC9B2,LOC106990504,BDH2,UBE2D3,LOC105615431,MANBA,TACR3,BANK1,LOC105615432,H2AFZ,LOC105612761,LOC105612972,TRNAC-GCA,DAPP1,LOC105615427,EMCN,NFKB1,SLC9B1
6	24173101	24174300	20080715	24911343	Fat density QTL (95849)	LAMTOR3,LOC105612165,LOC105615429,DNAJB14,SLC39A8,LOC106990491,PPP3CA,LOC101121856,CENPE,LOC105615568,LOC101122110,LOC106991231,LOC105615426,CISD2,DDIT4L,CXXC4,SLC9B2,LOC106990504,BDH2,UBE2D3,LOC105615431,MANBA,TACR3,BANK1,LOC105615432,H2AFZ,LOC105612761,LOC105612972,TRNAC-GCA,DAPP1,LOC105615427,EMCN,NFKB1,SLC9B1
6	24231501	24232700	20080715	24911343	Fat density QTL (95849)	LAMTOR3,LOC105612165,LOC105615429,DNAJB14,SLC39A8,LOC106990491,PPP3CA,LOC101121856,CENPE,LOC105615568,LOC101122110,LOC106991231,LOC105615426,CISD2,DDIT4L,CXXC4,SLC9B2,LOC106990504,BDH2,UBE2D3,LOC105615431,MANBA,TACR3,BANK1,LOC105615432,H2AFZ,LOC105612761,LOC105612972,TRNAC-GCA,DAPP1,LOC105615427,EMCN,NFKB1,SLC9B1
6	25135401	25136800	22261164	27713481	Bone area QTL (95788)	LAMTOR3,TRMT10A,LOC101123379,LOC105615429,DNAJB14,SLC39A8,ADH1C,LOC106990491,PPP3CA,MTTP,LOC105612764,C6H4orf17,EIF4E,LOC101111713,RAP1GDS1,LOC105613656,LOC101122110,LOC105615437,LOC105615426,LOC101102064,DDIT4L,LOC106990267,TRNAW-CCA,LOC101112481,LOC105615431,LOC106991232,LOC101112223,BANK1,LOC105615432,METAP1,H2AFZ,LOC105612761,LOC105615435,LOC105612638,TSPAN5,LOC105612972,TRNAC-GCA,DAPP1,LOC10…
6	25317601	25320100	22261164	27713481	Bone area QTL (95788)	LAMTOR3,TRMT10A,LOC101123379,LOC105615429,DNAJB14,SLC39A8,ADH1C,LOC106990491,PPP3CA,MTTP,LOC105612764,C6H4orf17,EIF4E,LOC101111713,RAP1GDS1,LOC105613656,LOC101122110,LOC105615437,LOC105615426,LOC101102064,DDIT4L,LOC106990267,TRNAW-CCA,LOC101112481,LOC105615431,LOC106991232,LOC101112223,BANK1,LOC105615432,METAP1,H2AFZ,LOC105612761,LOC105615435,LOC105612638,TSPAN5,LOC105612972,TRNAC-GCA,DAPP1,LOC10…
6	25320201	25325000	22261164	27713481	Bone area QTL (95788)	LAMTOR3,TRMT10A,LOC101123379,LOC105615429,DNAJB14,SLC39A8,ADH1C,LOC106990491,PPP3CA,MTTP,LOC105612764,C6H4orf17,EIF4E,LOC101111713,RAP1GDS1,LOC105613656,LOC101122110,LOC105615437,LOC105615426,LOC101102064,DDIT4L,LOC106990267,TRNAW-CCA,LOC101112481,LOC105615431,LOC106991232,LOC101112223,BANK1,LOC105615432,METAP1,H2AFZ,LOC105612761,LOC105615435,LOC105612638,TSPAN5,LOC105612972,TRNAC-GCA,DAPP1,LOC10…
6	25325001	25330600	22261164	27713481	Bone area QTL (95788)	LAMTOR3,TRMT10A,LOC101123379,LOC105615429,DNAJB14,SLC39A8,ADH1C,LOC106990491,PPP3CA,MTTP,LOC105612764,C6H4orf17,EIF4E,LOC101111713,RAP1GDS1,LOC105613656,LOC101122110,LOC105615437,LOC105615426,LOC101102064,DDIT4L,LOC106990267,TRNAW-CCA,LOC101112481,LOC105615431,LOC106991232,LOC101112223,BANK1,LOC105615432,METAP1,H2AFZ,LOC105612761,LOC105615435,LOC105612638,TSPAN5,LOC105612972,TRNAC-GCA,DAPP1,LOC10…
6	25341801	25359500	22261164	27713481	Bone area QTL (95788)	LAMTOR3,TRMT10A,LOC101123379,LOC105615429,DNAJB14,SLC39A8,ADH1C,LOC106990491,PPP3CA,MTTP,LOC105612764,C6H4orf17,EIF4E,LOC101111713,RAP1GDS1,LOC105613656,LOC101122110,LOC105615437,LOC105615426,LOC101102064,DDIT4L,LOC106990267,TRNAW-CCA,LOC101112481,LOC105615431,LOC106991232,LOC101112223,BANK1,LOC105615432,METAP1,H2AFZ,LOC105612761,LOC105615435,LOC105612638,TSPAN5,LOC105612972,TRNAC-GCA,DAPP1,LOC10…
6	25394001	25396600	22261164	27713481	Bone area QTL (95788)	LAMTOR3,TRMT10A,LOC101123379,LOC105615429,DNAJB14,SLC39A8,ADH1C,LOC106990491,PPP3CA,MTTP,LOC105612764,C6H4orf17,EIF4E,LOC101111713,RAP1GDS1,LOC105613656,LOC101122110,LOC105615437,LOC105615426,LOC101102064,DDIT4L,LOC106990267,TRNAW-CCA,LOC101112481,LOC105615431,LOC106991232,LOC101112223,BANK1,LOC105615432,METAP1,H2AFZ,LOC105612761,LOC105615435,LOC105612638,TSPAN5,LOC105612972,TRNAC-GCA,DAPP1,LOC10…
6	25466901	25467900	22261164	27713481	Bone area QTL (95788)	LAMTOR3,TRMT10A,LOC101123379,LOC105615429,DNAJB14,SLC39A8,ADH1C,LOC106990491,PPP3CA,MTTP,LOC105612764,C6H4orf17,EIF4E,LOC101111713,RAP1GDS1,LOC105613656,LOC101122110,LOC105615437,LOC105615426,LOC101102064,DDIT4L,LOC106990267,TRNAW-CCA,LOC101112481,LOC105615431,LOC106991232,LOC101112223,BANK1,LOC105615432,METAP1,H2AFZ,LOC105612761,LOC105615435,LOC105612638,TSPAN5,LOC105612972,TRNAC-GCA,DAPP1,LOC10…
6	25494301	25495800	22261164	27713481	Bone area QTL (95788)	LAMTOR3,TRMT10A,LOC101123379,LOC105615429,DNAJB14,SLC39A8,ADH1C,LOC106990491,PPP3CA,MTTP,LOC105612764,C6H4orf17,EIF4E,LOC101111713,RAP1GDS1,LOC105613656,LOC101122110,LOC105615437,LOC105615426,LOC101102064,DDIT4L,LOC106990267,TRNAW-CCA,LOC101112481,LOC105615431,LOC106991232,LOC101112223,BANK1,LOC105615432,METAP1,H2AFZ,LOC105612761,LOC105615435,LOC105612638,TSPAN5,LOC105612972,TRNAC-GCA,DAPP1,LOC10…
6	25713601	25714600	22261164	27713481	Bone area QTL (95788)	LAMTOR3,TRMT10A,LOC101123379,LOC105615429,DNAJB14,SLC39A8,ADH1C,LOC106990491,PPP3CA,MTTP,LOC105612764,C6H4orf17,EIF4E,LOC101111713,RAP1GDS1,LOC105613656,LOC101122110,LOC105615437,LOC105615426,LOC101102064,DDIT4L,LOC106990267,TRNAW-CCA,LOC101112481,LOC105615431,LOC106991232,LOC101112223,BANK1,LOC105615432,METAP1,H2AFZ,LOC105612761,LOC105615435,LOC105612638,TSPAN5,LOC105612972,TRNAC-GCA,DAPP1,LOC10…
6	26060901	26063300	22261164	27713481	Bone area QTL (95788)	LAMTOR3,TRMT10A,LOC101123379,LOC105615429,DNAJB14,SLC39A8,ADH1C,LOC106990491,PPP3CA,MTTP,LOC105612764,C6H4orf17,EIF4E,LOC101111713,RAP1GDS1,LOC105613656,LOC101122110,LOC105615437,LOC105615426,LOC101102064,DDIT4L,LOC106990267,TRNAW-CCA,LOC101112481,LOC105615431,LOC106991232,LOC101112223,BANK1,LOC105615432,METAP1,H2AFZ,LOC105612761,LOC105615435,LOC105612638,TSPAN5,LOC105612972,TRNAC-GCA,DAPP1,LOC10…
6	26453801	26454900	22261164	27713481	Bone area QTL (95788)	LAMTOR3,TRMT10A,LOC101123379,LOC105615429,DNAJB14,SLC39A8,ADH1C,LOC106990491,PPP3CA,MTTP,LOC105612764,C6H4orf17,EIF4E,LOC101111713,RAP1GDS1,LOC105613656,LOC101122110,LOC105615437,LOC105615426,LOC101102064,DDIT4L,LOC106990267,TRNAW-CCA,LOC101112481,LOC105615431,LOC106991232,LOC101112223,BANK1,LOC105615432,METAP1,H2AFZ,LOC105612761,LOC105615435,LOC105612638,TSPAN5,LOC105612972,TRNAC-GCA,DAPP1,LOC10…
6	27134001	27135100	22261164	27713481	Bone area QTL (95788)	LAMTOR3,TRMT10A,LOC101123379,LOC105615429,DNAJB14,SLC39A8,ADH1C,LOC106990491,PPP3CA,MTTP,LOC105612764,C6H4orf17,EIF4E,LOC101111713,RAP1GDS1,LOC105613656,LOC101122110,LOC105615437,LOC105615426,LOC101102064,DDIT4L,LOC106990267,TRNAW-CCA,LOC101112481,LOC105615431,LOC106991232,LOC101112223,BANK1,LOC105615432,METAP1,H2AFZ,LOC105612761,LOC105615435,LOC105612638,TSPAN5,LOC105612972,TRNAC-GCA,DAPP1,LOC10…
6	27718001	27719200	24922406	30221034	Total bone QTL (95783)	TRMT10A,LOC105615443,LOC101123379,ADH1C,LOC101122865,BMPR1B,MTTP,PDHA2,LOC105612764,C6H4orf17,EIF4E,LOC101111713,RAP1GDS1,LOC105613656,UNC5C,LOC105609581,LOC105615441,LOC105615437,LOC101102064,LOC106990267,TRNAW-CCA,LOC101112481,TRNAK-CUU,LOC106991232,LOC101112223,PDLIM5,HPGDS,METAP1,LOC105612638,TSPAN5,LOC106991233,LOC101123634,LOC105615435
6	27764501	27765500	24922406	30221034	Total bone QTL (95783)	TRMT10A,LOC105615443,LOC101123379,ADH1C,LOC101122865,BMPR1B,MTTP,PDHA2,LOC105612764,C6H4orf17,EIF4E,LOC101111713,RAP1GDS1,LOC105613656,UNC5C,LOC105609581,LOC105615441,LOC105615437,LOC101102064,LOC106990267,TRNAW-CCA,LOC101112481,TRNAK-CUU,LOC106991232,LOC101112223,PDLIM5,HPGDS,METAP1,LOC105612638,TSPAN5,LOC106991233,LOC101123634,LOC105615435
6	28455001	28457200	24922406	30221034	Total bone QTL (95783)	TRMT10A,LOC105615443,LOC101123379,ADH1C,LOC101122865,BMPR1B,MTTP,PDHA2,LOC105612764,C6H4orf17,EIF4E,LOC101111713,RAP1GDS1,LOC105613656,UNC5C,LOC105609581,LOC105615441,LOC105615437,LOC101102064,LOC106990267,TRNAW-CCA,LOC101112481,TRNAK-CUU,LOC106991232,LOC101112223,PDLIM5,HPGDS,METAP1,LOC105612638,TSPAN5,LOC106991233,LOC101123634,LOC105615435
6	29074501	29075600	24922406	30221034	Total bone QTL (95783)	TRMT10A,LOC105615443,LOC101123379,ADH1C,LOC101122865,BMPR1B,MTTP,PDHA2,LOC105612764,C6H4orf17,EIF4E,LOC101111713,RAP1GDS1,LOC105613656,UNC5C,LOC105609581,LOC105615441,LOC105615437,LOC101102064,LOC106990267,TRNAW-CCA,LOC101112481,TRNAK-CUU,LOC106991232,LOC101112223,PDLIM5,HPGDS,METAP1,LOC105612638,TSPAN5,LOC106991233,LOC101123634,LOC105615435
6	30985201	30986200	27810897	33398184	Total bone QTL (95784)	LOC105615443,LOC106991211,LOC101102814,BMPR1B,PDHA2,UNC5C,LOC105609581,LOC105615441,SMARCAD1,LOC106991234,ATOH1,CCSER1,TRNAW-CCA,TRNAK-CUU,LOC101102565,TRNAS-AGA,PDLIM5,HPGDS,GRID2,LOC106991233,LOC101116832
6	31940101	31941300	27810897	33398184	Total bone QTL (95784)	LOC105615443,LOC106991211,LOC101102814,BMPR1B,PDHA2,UNC5C,LOC105609581,LOC105615441,SMARCAD1,LOC106991234,ATOH1,CCSER1,TRNAW-CCA,TRNAK-CUU,LOC101102565,TRNAS-AGA,PDLIM5,HPGDS,GRID2,LOC106991233,LOC101116832
6	32149301	32150300	27810897	33398184	Total bone QTL (95784)	LOC105615443,LOC106991211,LOC101102814,BMPR1B,PDHA2,UNC5C,LOC105609581,LOC105615441,SMARCAD1,LOC106991234,ATOH1,CCSER1,TRNAW-CCA,TRNAK-CUU,LOC101102565,TRNAS-AGA,PDLIM5,HPGDS,GRID2,LOC106991233,LOC101116832
6	33161201	33163100	27810897	33398184	Total bone QTL (95784)	LOC105615443,LOC106991211,LOC101102814,BMPR1B,PDHA2,UNC5C,LOC105609581,LOC105615441,SMARCAD1,LOC106991234,ATOH1,CCSER1,TRNAW-CCA,TRNAK-CUU,LOC101102565,TRNAS-AGA,PDLIM5,HPGDS,GRID2,LOC106991233,LOC101116832
6	33270801	33272500	27810897	33398184	Total bone QTL (95784)	LOC105615443,LOC106991211,LOC101102814,BMPR1B,PDHA2,UNC5C,LOC105609581,LOC105615441,SMARCAD1,LOC106991234,ATOH1,CCSER1,TRNAW-CCA,TRNAK-CUU,LOC101102565,TRNAS-AGA,PDLIM5,HPGDS,GRID2,LOC106991233,LOC101116832
6	33468501	33469600	30239310	36768153	Total bone QTL (95777)	LOC106991211,PKD2,ABCG2,LOC101102814,GPRIN3,TIGD2,MMRN1,SMARCAD1,NAP1L5,LOC106991234,ATOH1,PIGY,PPM1K,MEPE,CCSER1,SPP1,TRNAW-CCA,PYURF,LOC101102565,TRNAS-AGA,HERC5,FAM13A,IBSP,HPGDS,LOC105615447,GRID2,HERC3,SNCA,LOC101116832,HERC6,LOC106991208
6	33598201	33600100	30239310	36768153	Total bone QTL (95777)	LOC106991211,PKD2,ABCG2,LOC101102814,GPRIN3,TIGD2,MMRN1,SMARCAD1,NAP1L5,LOC106991234,ATOH1,PIGY,PPM1K,MEPE,CCSER1,SPP1,TRNAW-CCA,PYURF,LOC101102565,TRNAS-AGA,HERC5,FAM13A,IBSP,HPGDS,LOC105615447,GRID2,HERC3,SNCA,LOC101116832,HERC6,LOC106991208
6	34031501	34032700	30239310	36768153	Total bone QTL (95777)	LOC106991211,PKD2,ABCG2,LOC101102814,GPRIN3,TIGD2,MMRN1,SMARCAD1,NAP1L5,LOC106991234,ATOH1,PIGY,PPM1K,MEPE,CCSER1,SPP1,TRNAW-CCA,PYURF,LOC101102565,TRNAS-AGA,HERC5,FAM13A,IBSP,HPGDS,LOC105615447,GRID2,HERC3,SNCA,LOC101116832,HERC6,LOC106991208
6	34108901	34110900	30239310	36768153	Total bone QTL (95777)	LOC106991211,PKD2,ABCG2,LOC101102814,GPRIN3,TIGD2,MMRN1,SMARCAD1,NAP1L5,LOC106991234,ATOH1,PIGY,PPM1K,MEPE,CCSER1,SPP1,TRNAW-CCA,PYURF,LOC101102565,TRNAS-AGA,HERC5,FAM13A,IBSP,HPGDS,LOC105615447,GRID2,HERC3,SNCA,LOC101116832,HERC6,LOC106991208
6	34196501	34198600	30239310	36768153	Total bone QTL (95777)	LOC106991211,PKD2,ABCG2,LOC101102814,GPRIN3,TIGD2,MMRN1,SMARCAD1,NAP1L5,LOC106991234,ATOH1,PIGY,PPM1K,MEPE,CCSER1,SPP1,TRNAW-CCA,PYURF,LOC101102565,TRNAS-AGA,HERC5,FAM13A,IBSP,HPGDS,LOC105615447,GRID2,HERC3,SNCA,LOC101116832,HERC6,LOC106991208
6	34528601	34529800	30239310	36768153	Total bone QTL (95777)	LOC106991211,PKD2,ABCG2,LOC101102814,GPRIN3,TIGD2,MMRN1,SMARCAD1,NAP1L5,LOC106991234,ATOH1,PIGY,PPM1K,MEPE,CCSER1,SPP1,TRNAW-CCA,PYURF,LOC101102565,TRNAS-AGA,HERC5,FAM13A,IBSP,HPGDS,LOC105615447,GRID2,HERC3,SNCA,LOC101116832,HERC6,LOC106991208
6	34905601	34906600	30239310	36768153	Total bone QTL (95777)	LOC106991211,PKD2,ABCG2,LOC101102814,GPRIN3,TIGD2,MMRN1,SMARCAD1,NAP1L5,LOC106991234,ATOH1,PIGY,PPM1K,MEPE,CCSER1,SPP1,TRNAW-CCA,PYURF,LOC101102565,TRNAS-AGA,HERC5,FAM13A,IBSP,HPGDS,LOC105615447,GRID2,HERC3,SNCA,LOC101116832,HERC6,LOC106991208
6	35306601	35308300	30239310	36768153	Total bone QTL (95777)	LOC106991211,PKD2,ABCG2,LOC101102814,GPRIN3,TIGD2,MMRN1,SMARCAD1,NAP1L5,LOC106991234,ATOH1,PIGY,PPM1K,MEPE,CCSER1,SPP1,TRNAW-CCA,PYURF,LOC101102565,TRNAS-AGA,HERC5,FAM13A,IBSP,HPGDS,LOC105615447,GRID2,HERC3,SNCA,LOC101116832,HERC6,LOC106991208
6	35322501	35323800	30239310	36768153	Total bone QTL (95777)	LOC106991211,PKD2,ABCG2,LOC101102814,GPRIN3,TIGD2,MMRN1,SMARCAD1,NAP1L5,LOC106991234,ATOH1,PIGY,PPM1K,MEPE,CCSER1,SPP1,TRNAW-CCA,PYURF,LOC101102565,TRNAS-AGA,HERC5,FAM13A,IBSP,HPGDS,LOC105615447,GRID2,HERC3,SNCA,LOC101116832,HERC6,LOC106991208
6	35677501	35679000	30239310	36768153	Total bone QTL (95777)	LOC106991211,PKD2,ABCG2,LOC101102814,GPRIN3,TIGD2,MMRN1,SMARCAD1,NAP1L5,LOC106991234,ATOH1,PIGY,PPM1K,MEPE,CCSER1,SPP1,TRNAW-CCA,PYURF,LOC101102565,TRNAS-AGA,HERC5,FAM13A,IBSP,HPGDS,LOC105615447,GRID2,HERC3,SNCA,LOC101116832,HERC6,LOC106991208
6	36592601	36593700	30239310	36768153	Total bone QTL (95777)	LOC106991211,PKD2,ABCG2,LOC101102814,GPRIN3,TIGD2,MMRN1,SMARCAD1,NAP1L5,LOC106991234,ATOH1,PIGY,PPM1K,MEPE,CCSER1,SPP1,TRNAW-CCA,PYURF,LOC101102565,TRNAS-AGA,HERC5,FAM13A,IBSP,HPGDS,LOC105615447,GRID2,HERC3,SNCA,LOC101116832,HERC6,LOC106991208
6	36855601	36857200	33423893	39230785	Total bone QTL (95778)	LOC101104580,LOC106991224,LCORL,PKD2,LOC105615456,ABCG2,GPRIN3,DCAF16,FAM184B,LAP3,LOC105615455,TIGD2,MMRN1,MED28,LOC101103815,TRNASTOP-UCA,NAP1L5,NCAPG,PIGY,MEPE,PPM1K,CCSER1,SPP1,TRNAW-CCA,PYURF,HERC5,FAM13A,IBSP,LOC105615447,TRNAA-CGC,LOC105608050,HERC3,LOC105608051,SNCA,HERC6,LOC105608049,LOC106991208
6	37405301	37406400	33423893	39230785	Total bone QTL (95778)	LOC101104580,LOC106991224,LCORL,PKD2,LOC105615456,ABCG2,GPRIN3,DCAF16,FAM184B,LAP3,LOC105615455,TIGD2,MMRN1,MED28,LOC101103815,TRNASTOP-UCA,NAP1L5,NCAPG,PIGY,MEPE,PPM1K,CCSER1,SPP1,TRNAW-CCA,PYURF,HERC5,FAM13A,IBSP,LOC105615447,TRNAA-CGC,LOC105608050,HERC3,LOC105608051,SNCA,HERC6,LOC105608049,LOC106991208
6	38530001	38531000	33423893	39230785	Total bone QTL (95778)	LOC101104580,LOC106991224,LCORL,PKD2,LOC105615456,ABCG2,GPRIN3,DCAF16,FAM184B,LAP3,LOC105615455,TIGD2,MMRN1,MED28,LOC101103815,TRNASTOP-UCA,NAP1L5,NCAPG,PIGY,MEPE,PPM1K,CCSER1,SPP1,TRNAW-CCA,PYURF,HERC5,FAM13A,IBSP,LOC105615447,TRNAA-CGC,LOC105608050,HERC3,LOC105608051,SNCA,HERC6,LOC105608049,LOC106991208
6	38671401	38672700	33423893	39230785	Total bone QTL (95778)	LOC101104580,LOC106991224,LCORL,PKD2,LOC105615456,ABCG2,GPRIN3,DCAF16,FAM184B,LAP3,LOC105615455,TIGD2,MMRN1,MED28,LOC101103815,TRNASTOP-UCA,NAP1L5,NCAPG,PIGY,MEPE,PPM1K,CCSER1,SPP1,TRNAW-CCA,PYURF,HERC5,FAM13A,IBSP,LOC105615447,TRNAA-CGC,LOC105608050,HERC3,LOC105608051,SNCA,HERC6,LOC105608049,LOC106991208
6	38779001	38780100	33423893	39230785	Total bone QTL (95778)	LOC101104580,LOC106991224,LCORL,PKD2,LOC105615456,ABCG2,GPRIN3,DCAF16,FAM184B,LAP3,LOC105615455,TIGD2,MMRN1,MED28,LOC101103815,TRNASTOP-UCA,NAP1L5,NCAPG,PIGY,MEPE,PPM1K,CCSER1,SPP1,TRNAW-CCA,PYURF,HERC5,FAM13A,IBSP,LOC105615447,TRNAA-CGC,LOC105608050,HERC3,LOC105608051,SNCA,HERC6,LOC105608049,LOC106991208
6	38894901	38897100	33423893	39230785	Total bone QTL (95778)	LOC101104580,LOC106991224,LCORL,PKD2,LOC105615456,ABCG2,GPRIN3,DCAF16,FAM184B,LAP3,LOC105615455,TIGD2,MMRN1,MED28,LOC101103815,TRNASTOP-UCA,NAP1L5,NCAPG,PIGY,MEPE,PPM1K,CCSER1,SPP1,TRNAW-CCA,PYURF,HERC5,FAM13A,IBSP,LOC105615447,TRNAA-CGC,LOC105608050,HERC3,LOC105608051,SNCA,HERC6,LOC105608049,LOC106991208
6	39056401	39057500	33423893	39230785	Total bone QTL (95778)	LOC101104580,LOC106991224,LCORL,PKD2,LOC105615456,ABCG2,GPRIN3,DCAF16,FAM184B,LAP3,LOC105615455,TIGD2,MMRN1,MED28,LOC101103815,TRNASTOP-UCA,NAP1L5,NCAPG,PIGY,MEPE,PPM1K,CCSER1,SPP1,TRNAW-CCA,PYURF,HERC5,FAM13A,IBSP,LOC105615447,TRNAA-CGC,LOC105608050,HERC3,LOC105608051,SNCA,HERC6,LOC105608049,LOC106991208
6	40242501	40244700	36840665	41831226	Total bone QTL (95779)	LOC101104580,LOC106991224,LCORL,LOC105615456,SLIT2,TRNAS-GGA,LOC101104829,DCAF16,LOC106991209,FAM184B,LAP3,LOC105615455,MED28,TRNASTOP-UCA,NCAPG,LOC106991210,LOC105615458,TRNAW-CCA,ADGRA3,LOC105608045,LOC101122950,TRNAA-CGC,LOC105611897,KCNIP4,LOC105608050,LOC105608051,PACRGL,LOC105608049
6	40482101	40485400	36840665	41831226	Total bone QTL (95779)	LOC101104580,LOC106991224,LCORL,LOC105615456,SLIT2,TRNAS-GGA,LOC101104829,DCAF16,LOC106991209,FAM184B,LAP3,LOC105615455,MED28,TRNASTOP-UCA,NCAPG,LOC106991210,LOC105615458,TRNAW-CCA,ADGRA3,LOC105608045,LOC101122950,TRNAA-CGC,LOC105611897,KCNIP4,LOC105608050,LOC105608051,PACRGL,LOC105608049
6	41942001	41943200	39253348	44148276	Bone area QTL (95794)	LOC105615460,SLIT2,TRNAS-GGA,LOC101104829,LOC106991213,LOC106991209,DHX15,PPARGC1A,LOC106991210,LOC105615458,TRNAW-CCA,ADGRA3,LOC105608045,LOC101122950,LOC101103396,LOC105611897,KCNIP4,SOD3,PACRGL,TRNAC-GCA,LOC105611900
6	42517501	42518500	39253348	44148276	Bone area QTL (95794)	LOC105615460,SLIT2,TRNAS-GGA,LOC101104829,LOC106991213,LOC106991209,DHX15,PPARGC1A,LOC106991210,LOC105615458,TRNAW-CCA,ADGRA3,LOC105608045,LOC101122950,LOC101103396,LOC105611897,KCNIP4,SOD3,PACRGL,TRNAC-GCA,LOC105611900
6	43109201	43111200	39253348	44148276	Bone area QTL (95794)	LOC105615460,SLIT2,TRNAS-GGA,LOC101104829,LOC106991213,LOC106991209,DHX15,PPARGC1A,LOC106991210,LOC105615458,TRNAW-CCA,ADGRA3,LOC105608045,LOC101122950,LOC101103396,LOC105611897,KCNIP4,SOD3,PACRGL,TRNAC-GCA,LOC105611900
6	43481901	43482900	39253348	44148276	Bone area QTL (95794)	LOC105615460,SLIT2,TRNAS-GGA,LOC101104829,LOC106991213,LOC106991209,DHX15,PPARGC1A,LOC106991210,LOC105615458,TRNAW-CCA,ADGRA3,LOC105608045,LOC101122950,LOC101103396,LOC105611897,KCNIP4,SOD3,PACRGL,TRNAC-GCA,LOC105611900
6	43873301	43874300	39253348	44148276	Bone area QTL (95794)	LOC105615460,SLIT2,TRNAS-GGA,LOC101104829,LOC106991213,LOC106991209,DHX15,PPARGC1A,LOC106991210,LOC105615458,TRNAW-CCA,ADGRA3,LOC105608045,LOC101122950,LOC101103396,LOC105611897,KCNIP4,SOD3,PACRGL,TRNAC-GCA,LOC105611900
6	43996101	43998000	39253348	44148276	Bone area QTL (95794)	LOC105615460,SLIT2,TRNAS-GGA,LOC101104829,LOC106991213,LOC106991209,DHX15,PPARGC1A,LOC106991210,LOC105615458,TRNAW-CCA,ADGRA3,LOC105608045,LOC101122950,LOC101103396,LOC105611897,KCNIP4,SOD3,PACRGL,TRNAC-GCA,LOC105611900
6	44182701	44184900	41856584	46592646	fat weight in carcass QTL (95824)	PI4K2B,TBC1D19,LOC105608875,LOC105615460,TRNAA-UGC,TRNAL-UAA,SEL1L3,STIM2,SEPSECS,LOC106991213,ANAPC4,DHX15,LOC105608879,ZCCHC4,PPARGC1A,RBPJ,CCDC149,LGI2,SMIM20,TRNAH-AUG,ADGRA3,CCKAR,LOC101103396,LOC101107788,SOD3,TRNAC-GCA,SLC34A2,LOC105611900,LOC105608876
6	45294301	45295500	41856584	46592646	fat weight in carcass QTL (95824)	PI4K2B,TBC1D19,LOC105608875,LOC105615460,TRNAA-UGC,TRNAL-UAA,SEL1L3,STIM2,SEPSECS,LOC106991213,ANAPC4,DHX15,LOC105608879,ZCCHC4,PPARGC1A,RBPJ,CCDC149,LGI2,SMIM20,TRNAH-AUG,ADGRA3,CCKAR,LOC101103396,LOC101107788,SOD3,TRNAC-GCA,SLC34A2,LOC105611900,LOC105608876
6	45339101	45341100	41856584	46592646	fat weight in carcass QTL (95824)	PI4K2B,TBC1D19,LOC105608875,LOC105615460,TRNAA-UGC,TRNAL-UAA,SEL1L3,STIM2,SEPSECS,LOC106991213,ANAPC4,DHX15,LOC105608879,ZCCHC4,PPARGC1A,RBPJ,CCDC149,LGI2,SMIM20,TRNAH-AUG,ADGRA3,CCKAR,LOC101103396,LOC101107788,SOD3,TRNAC-GCA,SLC34A2,LOC105611900,LOC105608876
6	46998201	47004100	46714919	51837086	Total muscle area QTL (95856)	LOC101107099,LOC101106847,LOC105612659,LOC101109273,LOC101107356,LOC101107868,PCDH7,LOC101108749
6	47021901	47026500	46714919	51837086	Total muscle area QTL (95856)	LOC101107099,LOC101106847,LOC105612659,LOC101109273,LOC101107356,LOC101107868,PCDH7,LOC101108749
6	47293801	47294800	46714919	51837086	Total muscle area QTL (95856)	LOC101107099,LOC101106847,LOC105612659,LOC101109273,LOC101107356,LOC101107868,PCDH7,LOC101108749
6	47413801	47414900	46714919	51837086	Total muscle area QTL (95856)	LOC101107099,LOC101106847,LOC105612659,LOC101109273,LOC101107356,LOC101107868,PCDH7,LOC101108749
6	47414901	47415900	46714919	51837086	Total muscle area QTL (95856)	LOC101107099,LOC101106847,LOC105612659,LOC101109273,LOC101107356,LOC101107868,PCDH7,LOC101108749
6	48815001	48816000	46714919	51837086	Total muscle area QTL (95856)	LOC101107099,LOC101106847,LOC105612659,LOC101109273,LOC101107356,LOC101107868,PCDH7,LOC101108749
6	49262801	49263800	46714919	51837086	Total muscle area QTL (95856)	LOC101107099,LOC101106847,LOC105612659,LOC101109273,LOC101107356,LOC101107868,PCDH7,LOC101108749
6	49536101	49537100	46714919	51837086	Total muscle area QTL (95856)	LOC101107099,LOC101106847,LOC105612659,LOC101109273,LOC101107356,LOC101107868,PCDH7,LOC101108749
6	50137101	50138400	46714919	51837086	Total muscle area QTL (95856)	LOC101107099,LOC101106847,LOC105612659,LOC101109273,LOC101107356,LOC101107868,PCDH7,LOC101108749
6	50218701	50219900	46714919	51837086	Total muscle area QTL (95856)	LOC101107099,LOC101106847,LOC105612659,LOC101109273,LOC101107356,LOC101107868,PCDH7,LOC101108749
6	50741901	50743800	46714919	51837086	Total muscle area QTL (95856)	LOC101107099,LOC101106847,LOC105612659,LOC101109273,LOC101107356,LOC101107868,PCDH7,LOC101108749
6	50808301	50810700	46714919	51837086	Total muscle area QTL (95856)	LOC101107099,LOC101106847,LOC105612659,LOC101109273,LOC101107356,LOC101107868,PCDH7,LOC101108749
6	50823501	50825300	46714919	51837086	Total muscle area QTL (95856)	LOC101107099,LOC101106847,LOC105612659,LOC101109273,LOC101107356,LOC101107868,PCDH7,LOC101108749
6	51454901	51456200	46714919	51837086	Total muscle area QTL (95856)	LOC101107099,LOC101106847,LOC105612659,LOC101109273,LOC101107356,LOC101107868,PCDH7,LOC101108749
6	73797301	73798400	72167112	77140289	Fecal egg count QTL (95612)	LOC105611517,IGFBP7,LOC105611516,LOC101111099,LOC105615501,POLR2B,LOC101118954,TRNAC-GCA,NOA1,LOC101119217,LOC101118699,ADGRL3,LOC105611520
6	74430601	74431900	72167112	77140289	Fecal egg count QTL (95612)	LOC105611517,IGFBP7,LOC105611516,LOC101111099,LOC105615501,POLR2B,LOC101118954,TRNAC-GCA,NOA1,LOC101119217,LOC101118699,ADGRL3,LOC105611520
6	74449901	74451500	72167112	77140289	Fecal egg count QTL (95612)	LOC105611517,IGFBP7,LOC105611516,LOC101111099,LOC105615501,POLR2B,LOC101118954,TRNAC-GCA,NOA1,LOC101119217,LOC101118699,ADGRL3,LOC105611520
6	74816501	74818300	72167112	77140289	Fecal egg count QTL (95612)	LOC105611517,IGFBP7,LOC105611516,LOC101111099,LOC105615501,POLR2B,LOC101118954,TRNAC-GCA,NOA1,LOC101119217,LOC101118699,ADGRL3,LOC105611520
6	74841201	74843100	72167112	77140289	Fecal egg count QTL (95612)	LOC105611517,IGFBP7,LOC105611516,LOC101111099,LOC105615501,POLR2B,LOC101118954,TRNAC-GCA,NOA1,LOC101119217,LOC101118699,ADGRL3,LOC105611520
6	74999301	75000300	72167112	77140289	Fecal egg count QTL (95612)	LOC105611517,IGFBP7,LOC105611516,LOC101111099,LOC105615501,POLR2B,LOC101118954,TRNAC-GCA,NOA1,LOC101119217,LOC101118699,ADGRL3,LOC105611520
6	76004601	76006500	72167112	77140289	Fecal egg count QTL (95612)	LOC105611517,IGFBP7,LOC105611516,LOC101111099,LOC105615501,POLR2B,LOC101118954,TRNAC-GCA,NOA1,LOC101119217,LOC101118699,ADGRL3,LOC105611520
6	76191501	76195800	72167112	77140289	Fecal egg count QTL (95612)	LOC105611517,IGFBP7,LOC105611516,LOC101111099,LOC105615501,POLR2B,LOC101118954,TRNAC-GCA,NOA1,LOC101119217,LOC101118699,ADGRL3,LOC105611520
6	76820101	76821100	72167112	77140289	Fecal egg count QTL (95612)	LOC105611517,IGFBP7,LOC105611516,LOC101111099,LOC105615501,POLR2B,LOC101118954,TRNAC-GCA,NOA1,LOC101119217,LOC101118699,ADGRL3,LOC105611520
6	77120801	77122500	72167112	77140289	Fecal egg count QTL (95612)	LOC105611517,IGFBP7,LOC105611516,LOC101111099,LOC105615501,POLR2B,LOC101118954,TRNAC-GCA,NOA1,LOC101119217,LOC101118699,ADGRL3,LOC105611520
6	80986001	80987700	80789381	91274336	Fecal egg count QTL (95607)	LOC101123301,LOC105607844,EREG,CSN1S2,LOC101104999,LOC105607839,GC,CCDC158,AREG,LOC101115964,MTHFD2L,LOC101122029,LOC105614010,LOC101102392,GRSF1,LOC105609344,SULT1B1,PF4,LOC101102731,LOC101118447,LOC105613274,USO1,CXCL9,LOC101104151,LOC105615512,MOB1B,TMPRSS11B,SHROOM3,LOC105615517,ADAMTS3,CENPC,TRNAC-GCA,NUP54,LOC105615577,LOC105612991,LOC101117764,AFM,LOC101116729,CXCL1,LOC105615578,LOC1011225…
6	81303601	81304800	80789381	91274336	Fecal egg count QTL (95607)	LOC101123301,LOC105607844,EREG,CSN1S2,LOC101104999,LOC105607839,GC,CCDC158,AREG,LOC101115964,MTHFD2L,LOC101122029,LOC105614010,LOC101102392,GRSF1,LOC105609344,SULT1B1,PF4,LOC101102731,LOC101118447,LOC105613274,USO1,CXCL9,LOC101104151,LOC105615512,MOB1B,TMPRSS11B,SHROOM3,LOC105615517,ADAMTS3,CENPC,TRNAC-GCA,NUP54,LOC105615577,LOC105612991,LOC101117764,AFM,LOC101116729,CXCL1,LOC105615578,LOC1011225…
6	82007001	82014500	80789381	91274336	Fecal egg count QTL (95607)	LOC101123301,LOC105607844,EREG,CSN1S2,LOC101104999,LOC105607839,GC,CCDC158,AREG,LOC101115964,MTHFD2L,LOC101122029,LOC105614010,LOC101102392,GRSF1,LOC105609344,SULT1B1,PF4,LOC101102731,LOC101118447,LOC105613274,USO1,CXCL9,LOC101104151,LOC105615512,MOB1B,TMPRSS11B,SHROOM3,LOC105615517,ADAMTS3,CENPC,TRNAC-GCA,NUP54,LOC105615577,LOC105612991,LOC101117764,AFM,LOC101116729,CXCL1,LOC105615578,LOC1011225…
6	82060701	82061700	80789381	91274336	Fecal egg count QTL (95607)	LOC101123301,LOC105607844,EREG,CSN1S2,LOC101104999,LOC105607839,GC,CCDC158,AREG,LOC101115964,MTHFD2L,LOC101122029,LOC105614010,LOC101102392,GRSF1,LOC105609344,SULT1B1,PF4,LOC101102731,LOC101118447,LOC105613274,USO1,CXCL9,LOC101104151,LOC105615512,MOB1B,TMPRSS11B,SHROOM3,LOC105615517,ADAMTS3,CENPC,TRNAC-GCA,NUP54,LOC105615577,LOC105612991,LOC101117764,AFM,LOC101116729,CXCL1,LOC105615578,LOC1011225…
6	82303201	82308900	80789381	91274336	Fecal egg count QTL (95607)	LOC101123301,LOC105607844,EREG,CSN1S2,LOC101104999,LOC105607839,GC,CCDC158,AREG,LOC101115964,MTHFD2L,LOC101122029,LOC105614010,LOC101102392,GRSF1,LOC105609344,SULT1B1,PF4,LOC101102731,LOC101118447,LOC105613274,USO1,CXCL9,LOC101104151,LOC105615512,MOB1B,TMPRSS11B,SHROOM3,LOC105615517,ADAMTS3,CENPC,TRNAC-GCA,NUP54,LOC105615577,LOC105612991,LOC101117764,AFM,LOC101116729,CXCL1,LOC105615578,LOC1011225…
6	82340001	82341300	80789381	91274336	Fecal egg count QTL (95607)	LOC101123301,LOC105607844,EREG,CSN1S2,LOC101104999,LOC105607839,GC,CCDC158,AREG,LOC101115964,MTHFD2L,LOC101122029,LOC105614010,LOC101102392,GRSF1,LOC105609344,SULT1B1,PF4,LOC101102731,LOC101118447,LOC105613274,USO1,CXCL9,LOC101104151,LOC105615512,MOB1B,TMPRSS11B,SHROOM3,LOC105615517,ADAMTS3,CENPC,TRNAC-GCA,NUP54,LOC105615577,LOC105612991,LOC101117764,AFM,LOC101116729,CXCL1,LOC105615578,LOC1011225…
6	82481101	82483200	80789381	91274336	Fecal egg count QTL (95607)	LOC101123301,LOC105607844,EREG,CSN1S2,LOC101104999,LOC105607839,GC,CCDC158,AREG,LOC101115964,MTHFD2L,LOC101122029,LOC105614010,LOC101102392,GRSF1,LOC105609344,SULT1B1,PF4,LOC101102731,LOC101118447,LOC105613274,USO1,CXCL9,LOC101104151,LOC105615512,MOB1B,TMPRSS11B,SHROOM3,LOC105615517,ADAMTS3,CENPC,TRNAC-GCA,NUP54,LOC105615577,LOC105612991,LOC101117764,AFM,LOC101116729,CXCL1,LOC105615578,LOC1011225…
6	82654101	82673700	80789381	91274336	Fecal egg count QTL (95607)	LOC101123301,LOC105607844,EREG,CSN1S2,LOC101104999,LOC105607839,GC,CCDC158,AREG,LOC101115964,MTHFD2L,LOC101122029,LOC105614010,LOC101102392,GRSF1,LOC105609344,SULT1B1,PF4,LOC101102731,LOC101118447,LOC105613274,USO1,CXCL9,LOC101104151,LOC105615512,MOB1B,TMPRSS11B,SHROOM3,LOC105615517,ADAMTS3,CENPC,TRNAC-GCA,NUP54,LOC105615577,LOC105612991,LOC101117764,AFM,LOC101116729,CXCL1,LOC105615578,LOC1011225…
6	82913101	82914500	80789381	91274336	Fecal egg count QTL (95607)	LOC101123301,LOC105607844,EREG,CSN1S2,LOC101104999,LOC105607839,GC,CCDC158,AREG,LOC101115964,MTHFD2L,LOC101122029,LOC105614010,LOC101102392,GRSF1,LOC105609344,SULT1B1,PF4,LOC101102731,LOC101118447,LOC105613274,USO1,CXCL9,LOC101104151,LOC105615512,MOB1B,TMPRSS11B,SHROOM3,LOC105615517,ADAMTS3,CENPC,TRNAC-GCA,NUP54,LOC105615577,LOC105612991,LOC101117764,AFM,LOC101116729,CXCL1,LOC105615578,LOC1011225…
6	82952801	82955400	80789381	91274336	Fecal egg count QTL (95607)	LOC101123301,LOC105607844,EREG,CSN1S2,LOC101104999,LOC105607839,GC,CCDC158,AREG,LOC101115964,MTHFD2L,LOC101122029,LOC105614010,LOC101102392,GRSF1,LOC105609344,SULT1B1,PF4,LOC101102731,LOC101118447,LOC105613274,USO1,CXCL9,LOC101104151,LOC105615512,MOB1B,TMPRSS11B,SHROOM3,LOC105615517,ADAMTS3,CENPC,TRNAC-GCA,NUP54,LOC105615577,LOC105612991,LOC101117764,AFM,LOC101116729,CXCL1,LOC105615578,LOC1011225…
6	82979601	82981400	80789381	91274336	Fecal egg count QTL (95607)	LOC101123301,LOC105607844,EREG,CSN1S2,LOC101104999,LOC105607839,GC,CCDC158,AREG,LOC101115964,MTHFD2L,LOC101122029,LOC105614010,LOC101102392,GRSF1,LOC105609344,SULT1B1,PF4,LOC101102731,LOC101118447,LOC105613274,USO1,CXCL9,LOC101104151,LOC105615512,MOB1B,TMPRSS11B,SHROOM3,LOC105615517,ADAMTS3,CENPC,TRNAC-GCA,NUP54,LOC105615577,LOC105612991,LOC101117764,AFM,LOC101116729,CXCL1,LOC105615578,LOC1011225…
6	83474801	83477900	80789381	91274336	Fecal egg count QTL (95607)	LOC101123301,LOC105607844,EREG,CSN1S2,LOC101104999,LOC105607839,GC,CCDC158,AREG,LOC101115964,MTHFD2L,LOC101122029,LOC105614010,LOC101102392,GRSF1,LOC105609344,SULT1B1,PF4,LOC101102731,LOC101118447,LOC105613274,USO1,CXCL9,LOC101104151,LOC105615512,MOB1B,TMPRSS11B,SHROOM3,LOC105615517,ADAMTS3,CENPC,TRNAC-GCA,NUP54,LOC105615577,LOC105612991,LOC101117764,AFM,LOC101116729,CXCL1,LOC105615578,LOC1011225…
6	83592301	83593400	80789381	91274336	Fecal egg count QTL (95607)	LOC101123301,LOC105607844,EREG,CSN1S2,LOC101104999,LOC105607839,GC,CCDC158,AREG,LOC101115964,MTHFD2L,LOC101122029,LOC105614010,LOC101102392,GRSF1,LOC105609344,SULT1B1,PF4,LOC101102731,LOC101118447,LOC105613274,USO1,CXCL9,LOC101104151,LOC105615512,MOB1B,TMPRSS11B,SHROOM3,LOC105615517,ADAMTS3,CENPC,TRNAC-GCA,NUP54,LOC105615577,LOC105612991,LOC101117764,AFM,LOC101116729,CXCL1,LOC105615578,LOC1011225…
6	83609001	83610000	80789381	91274336	Fecal egg count QTL (95607)	LOC101123301,LOC105607844,EREG,CSN1S2,LOC101104999,LOC105607839,GC,CCDC158,AREG,LOC101115964,MTHFD2L,LOC101122029,LOC105614010,LOC101102392,GRSF1,LOC105609344,SULT1B1,PF4,LOC101102731,LOC101118447,LOC105613274,USO1,CXCL9,LOC101104151,LOC105615512,MOB1B,TMPRSS11B,SHROOM3,LOC105615517,ADAMTS3,CENPC,TRNAC-GCA,NUP54,LOC105615577,LOC105612991,LOC101117764,AFM,LOC101116729,CXCL1,LOC105615578,LOC1011225…
6	83672001	83674000	80789381	91274336	Fecal egg count QTL (95607)	LOC101123301,LOC105607844,EREG,CSN1S2,LOC101104999,LOC105607839,GC,CCDC158,AREG,LOC101115964,MTHFD2L,LOC101122029,LOC105614010,LOC101102392,GRSF1,LOC105609344,SULT1B1,PF4,LOC101102731,LOC101118447,LOC105613274,USO1,CXCL9,LOC101104151,LOC105615512,MOB1B,TMPRSS11B,SHROOM3,LOC105615517,ADAMTS3,CENPC,TRNAC-GCA,NUP54,LOC105615577,LOC105612991,LOC101117764,AFM,LOC101116729,CXCL1,LOC105615578,LOC1011225…
6	83872701	83876200	80789381	91274336	Fecal egg count QTL (95607)	LOC101123301,LOC105607844,EREG,CSN1S2,LOC101104999,LOC105607839,GC,CCDC158,AREG,LOC101115964,MTHFD2L,LOC101122029,LOC105614010,LOC101102392,GRSF1,LOC105609344,SULT1B1,PF4,LOC101102731,LOC101118447,LOC105613274,USO1,CXCL9,LOC101104151,LOC105615512,MOB1B,TMPRSS11B,SHROOM3,LOC105615517,ADAMTS3,CENPC,TRNAC-GCA,NUP54,LOC105615577,LOC105612991,LOC101117764,AFM,LOC101116729,CXCL1,LOC105615578,LOC1011225…
6	83916301	83918800	80789381	91274336	Fecal egg count QTL (95607)	LOC101123301,LOC105607844,EREG,CSN1S2,LOC101104999,LOC105607839,GC,CCDC158,AREG,LOC101115964,MTHFD2L,LOC101122029,LOC105614010,LOC101102392,GRSF1,LOC105609344,SULT1B1,PF4,LOC101102731,LOC101118447,LOC105613274,USO1,CXCL9,LOC101104151,LOC105615512,MOB1B,TMPRSS11B,SHROOM3,LOC105615517,ADAMTS3,CENPC,TRNAC-GCA,NUP54,LOC105615577,LOC105612991,LOC101117764,AFM,LOC101116729,CXCL1,LOC105615578,LOC1011225…
6	84127601	84135000	80789381	91274336	Fecal egg count QTL (95607)	LOC101123301,LOC105607844,EREG,CSN1S2,LOC101104999,LOC105607839,GC,CCDC158,AREG,LOC101115964,MTHFD2L,LOC101122029,LOC105614010,LOC101102392,GRSF1,LOC105609344,SULT1B1,PF4,LOC101102731,LOC101118447,LOC105613274,USO1,CXCL9,LOC101104151,LOC105615512,MOB1B,TMPRSS11B,SHROOM3,LOC105615517,ADAMTS3,CENPC,TRNAC-GCA,NUP54,LOC105615577,LOC105612991,LOC101117764,AFM,LOC101116729,CXCL1,LOC105615578,LOC1011225…
6	84227801	84229600	80789381	91274336	Fecal egg count QTL (95607)	LOC101123301,LOC105607844,EREG,CSN1S2,LOC101104999,LOC105607839,GC,CCDC158,AREG,LOC101115964,MTHFD2L,LOC101122029,LOC105614010,LOC101102392,GRSF1,LOC105609344,SULT1B1,PF4,LOC101102731,LOC101118447,LOC105613274,USO1,CXCL9,LOC101104151,LOC105615512,MOB1B,TMPRSS11B,SHROOM3,LOC105615517,ADAMTS3,CENPC,TRNAC-GCA,NUP54,LOC105615577,LOC105612991,LOC101117764,AFM,LOC101116729,CXCL1,LOC105615578,LOC1011225…
6	84239501	84243200	80789381	91274336	Fecal egg count QTL (95607)	LOC101123301,LOC105607844,EREG,CSN1S2,LOC101104999,LOC105607839,GC,CCDC158,AREG,LOC101115964,MTHFD2L,LOC101122029,LOC105614010,LOC101102392,GRSF1,LOC105609344,SULT1B1,PF4,LOC101102731,LOC101118447,LOC105613274,USO1,CXCL9,LOC101104151,LOC105615512,MOB1B,TMPRSS11B,SHROOM3,LOC105615517,ADAMTS3,CENPC,TRNAC-GCA,NUP54,LOC105615577,LOC105612991,LOC101117764,AFM,LOC101116729,CXCL1,LOC105615578,LOC1011225…
6	84370001	84371600	80789381	91274336	Fecal egg count QTL (95607)	LOC101123301,LOC105607844,EREG,CSN1S2,LOC101104999,LOC105607839,GC,CCDC158,AREG,LOC101115964,MTHFD2L,LOC101122029,LOC105614010,LOC101102392,GRSF1,LOC105609344,SULT1B1,PF4,LOC101102731,LOC101118447,LOC105613274,USO1,CXCL9,LOC101104151,LOC105615512,MOB1B,TMPRSS11B,SHROOM3,LOC105615517,ADAMTS3,CENPC,TRNAC-GCA,NUP54,LOC105615577,LOC105612991,LOC101117764,AFM,LOC101116729,CXCL1,LOC105615578,LOC1011225…
6	85088101	85089300	80789381	91274336	Fecal egg count QTL (95607)	LOC101123301,LOC105607844,EREG,CSN1S2,LOC101104999,LOC105607839,GC,CCDC158,AREG,LOC101115964,MTHFD2L,LOC101122029,LOC105614010,LOC101102392,GRSF1,LOC105609344,SULT1B1,PF4,LOC101102731,LOC101118447,LOC105613274,USO1,CXCL9,LOC101104151,LOC105615512,MOB1B,TMPRSS11B,SHROOM3,LOC105615517,ADAMTS3,CENPC,TRNAC-GCA,NUP54,LOC105615577,LOC105612991,LOC101117764,AFM,LOC101116729,CXCL1,LOC105615578,LOC1011225…
6	85628401	85629600	80789381	91274336	Fecal egg count QTL (95607)	LOC101123301,LOC105607844,EREG,CSN1S2,LOC101104999,LOC105607839,GC,CCDC158,AREG,LOC101115964,MTHFD2L,LOC101122029,LOC105614010,LOC101102392,GRSF1,LOC105609344,SULT1B1,PF4,LOC101102731,LOC101118447,LOC105613274,USO1,CXCL9,LOC101104151,LOC105615512,MOB1B,TMPRSS11B,SHROOM3,LOC105615517,ADAMTS3,CENPC,TRNAC-GCA,NUP54,LOC105615577,LOC105612991,LOC101117764,AFM,LOC101116729,CXCL1,LOC105615578,LOC1011225…
[truncated: 915 more rows]
