# Supplementary material for: A global analysis of CNVs in Chinese indigenous fine-wool sheep populations using whole-genome resequencing
Source: BMC Genomics. 2021 Jan 23;22:78. doi: 10.1186/s12864-021-07387-7 (PMC7825165; doi:10.1186/s12864-021-07387-7)
Supplement: Supplementary file 12 — Additional file 12: Table S10. KEGG analysis of CNVR-harbored genes differentially expressed between the horned and polled groups. [file 12864_2021_7387_MOESM12_ESM.xlsx]

## Sheet: Table S10
Table S10 KEGG analysis of CNVR-harbored genes differentially expressed between the horned and polled groups.
ID	Description	Input number	Background number	pValue	Corrected pValue
oas04740	Olfactory transduction	15	832	0.00626576	0.516724
oas04330	Notch signaling pathway	3	52	0.0115815	0.516724
oas04614	Renin-angiotensin system	2	20	0.0149426	0.516724
oas00511	Other glycan degradation	2	21	0.0162748	0.516724
oas03008	Ribosome biogenesis in eukaryotes	3	80	0.0341409	0.817722
oas04512	ECM-receptor interaction	3	89	0.0441689	0.817722
oas04144	Endocytosis	5	226	0.0483792	0.817722
