# Supplementary material for: A global analysis of CNVs in Chinese indigenous fine-wool sheep populations using whole-genome resequencing
Source: BMC Genomics. 2021 Jan 23;22:78. doi: 10.1186/s12864-021-07387-7 (PMC7825165; doi:10.1186/s12864-021-07387-7)
Supplement: Supplementary file 15 — Additional file 15: Table S12. Primers used in this study for qPCR. [file 12864_2021_7387_MOESM15_ESM.xlsx]

## Sheet: Table S12
Table S12. Primers used in this study for qPCR.
Chr	Start	End	Length	Type	Gene name	Gene type	F	R	Products length (bp)
12	5622101	5627200	5100	duplication	LOC101116750	exonic	AACCAGCTTCCTGCTTCTCT	GTTTGCAGGGTCCATTCCTC	177
14	56101801	56105800	4000	duplication	LOC101121369	exonic	TCCTCCCGCCTTCAATCTTT	AGGACTGATGCTGAAGCTGA	104
2	246250201	246251300	1100	duplication	EMC1	exonic	GGAGAAAGAAGAGCCACCCT	TGGGAGGATGAAACGAGAGG	139
2	220240101	220241500	1400	deletion	LOC101113571	exonic	CAGTGCACAAGCACAGATCA	GCCTGGACACAAACGAGTTC	138
3	647401	650200	2800	deletion	LOC101108730	exonic	CTTCGTGTTGACTTGCTGGT	ACTTTGGAGGTAGGGAGTGC	114
21	47730101	47731400	1300	deletion	CARS	exonic	GCTCATCAAGATGGCAGGAC	ACCCGGCTCTAAACACAGAG	120
13	59890401	59891600	1200	deletion	SOX12	exonic	CGGGATCTTCTCCGAGTCCA	GCGGAAGATCATGACCAGTG	101
26	17850701	17852100	1400	deletion	FRG1	intronic	TGGGAAACAGTTGAGGAGCA	CGGACCTTGGGTTGACAAAG	176
25	1606601	1608900	2300	duplication	GALNT2	intronic	ATCCCTGACCTGTGACCTTG	GTGACAGCCTCGTGCTATTG	185
9	13041401	13042900	1500	deletion	LOC101105008,LOC101105510,	intergenic	CCTGGCATACACCAGGTTTG	AGTCTACGCTGGATCAGTGG	194
9	13566142	13575279	9138	reference	DGAT1		TCAACGACTGGATGACTGCC	TTTCCCACTTGGGCCAGTTT	109
